# Supplementary material for: Comparative Genomic Analysis of Asian Cultivated Rice and Its Wild Progenitor (Oryza rufipogon) Has Revealed Evolutionary Innovation of the Pentatricopeptide Repeat Gene Family through Gene Duplication
Source: MDPI journal article supplement (doi:10.3390/ijms242216313), 2023-11-14

# LOC\_Os01g01115 RUF000036

Osa\_Chr1  
0.01-0.15Mb

Oru\_Chr1  
0.43-0.55Mb

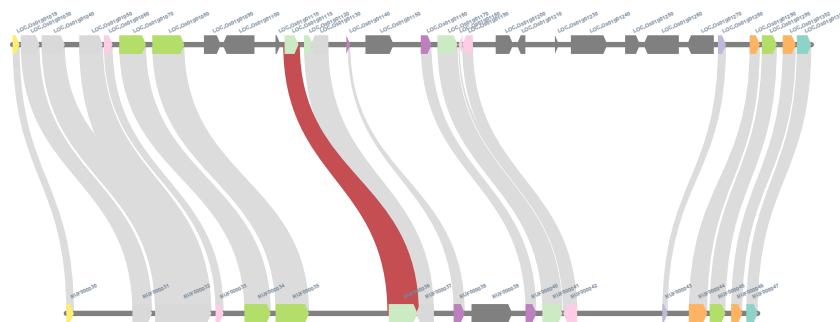

## LOC\_Os01g05860 RUF000374

Osa\_Chr1  
2.69-2.92Mb

Oru\_Chr1  
3.07-3.34Mb

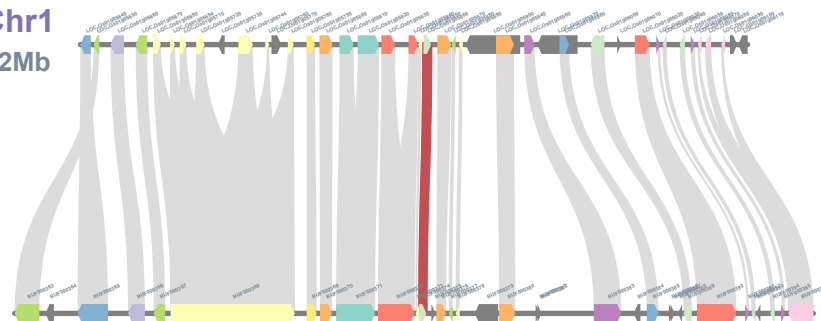

# LOC\_Os01g06000 RUF000389

Osa\_Chr1  
2.74-2.96Mb

Oru\_Chr1  
3.12-3.37Mb

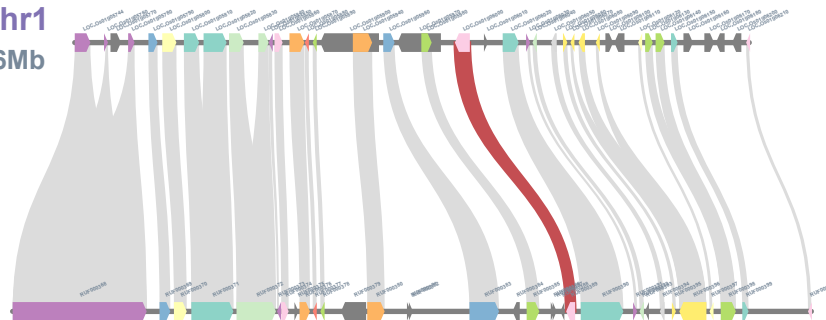

LOC\_Os01g07340 RUF000487

Osa\_Chr1  
3.35-3.60Mb

Oru\_Chr1  
3.77-4.04Mb

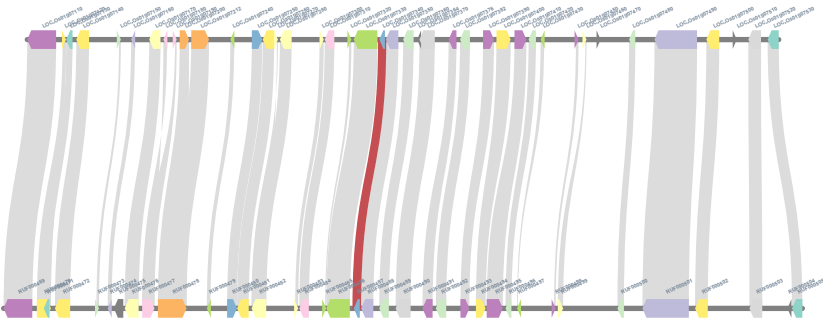



## LOC\_Os01g08120 RUF000550

Osa\_Chr1  
3.82-4.09Mb

Oru\_Chr1  
4.27-4.53Mb

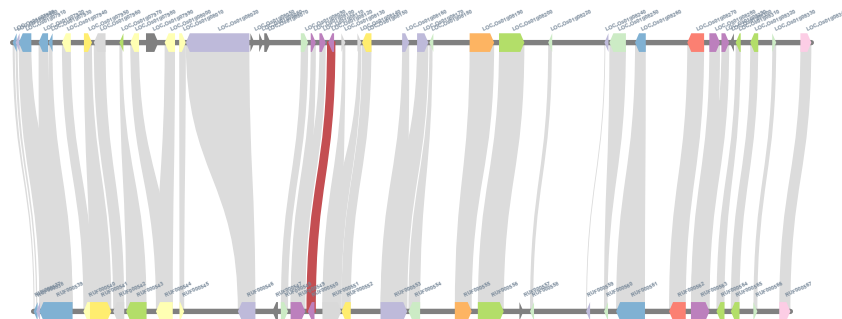

# LOC\_Os01g10090 RUF000699

Osa\_Chr1  
5.13-5.42Mb

Oru\_Chr1  
5.48-5.79Mb

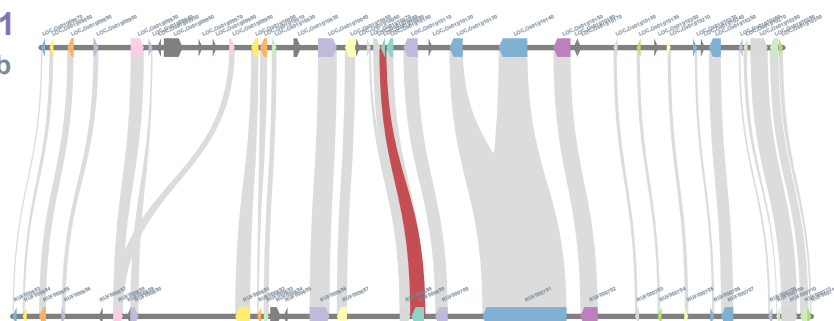

## LOC\_Os01g10800 RUF000745

**Osa\_Chr1**  
5.64-5.87Mb

**Oru\_Chr1**  
6.02-6.26Mb

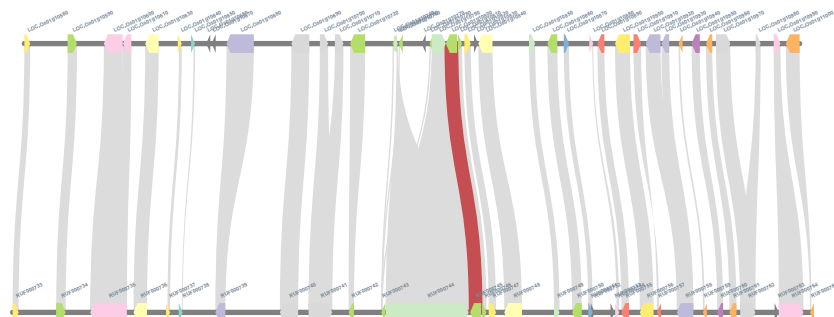

LOC\_Os01g12810 RUF000907

Osa\_Chr1  
6.93-7.25Mb

Oru\_Chr1  
7.37-7.72Mb

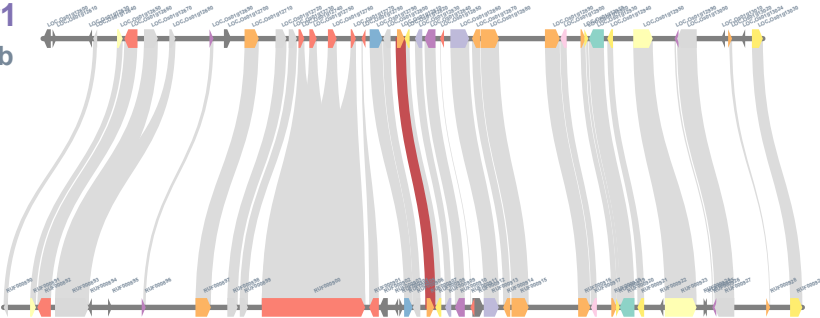

**LOC\_Os01g15530 RUF001055**

## Osa\_Chr1

8.56-8.87Mb

Oru\_Chr1

8.90-9.13Mb

# LOC\_Os01g15840 RUF001075

Osa\_Chr1  
8.77-9.05Mb

Oru\_Chr1  
9.09-9.32Mb

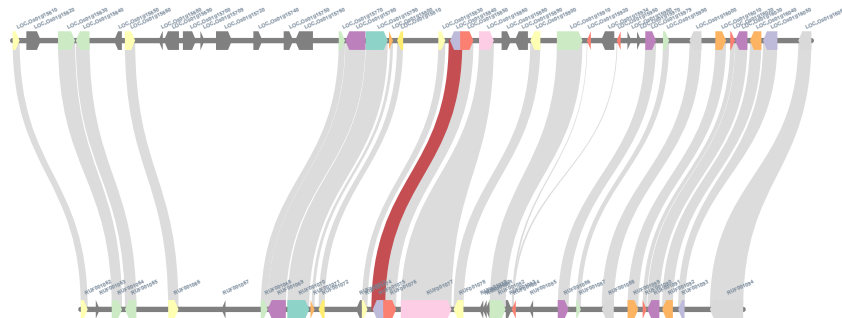

## LOC\_Os01g17320 RUF001201

**Osa\_Chr1**  
9.81-10.08Mb

**Oru\_Chr1**  
10.12-10.37Mb

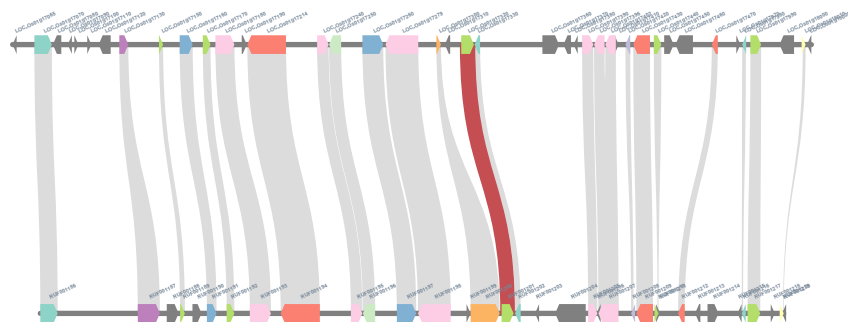

LOC\_Os01g19380 RUF001315

Osa\_Chr1  
10.83-11.13Mb

Oru\_Chr1  
11.19-11.89Mb

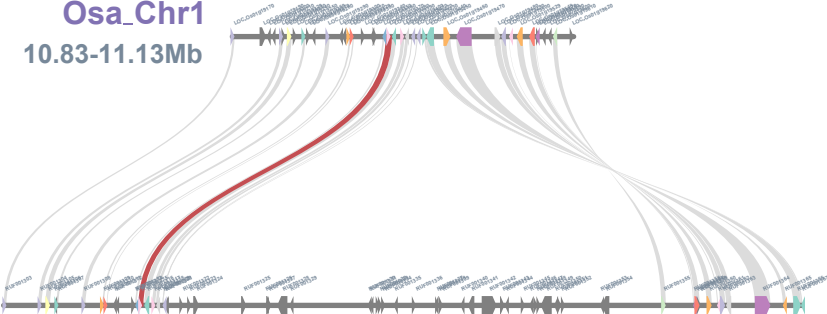



# LOC\_Os01g19490 RUF001362

**Osa\_Chr1**  
10.91-11.20Mb

**Oru\_Chr1**  
11.26-11.89Mb

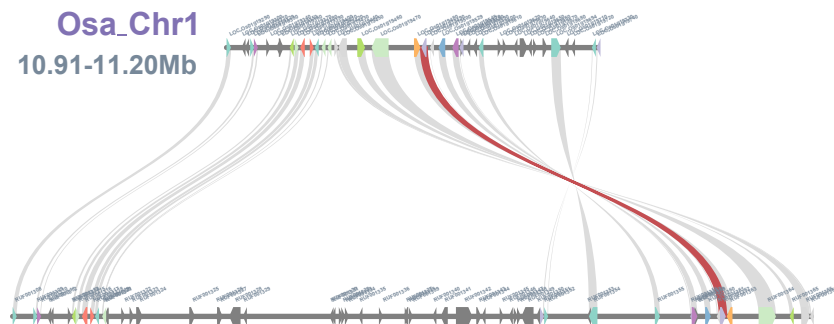

LOC\_Os01g19529 RUF001360

Osa\_Chr1  
10.93-11.22Mb

Oru\_Chr1  
11.28-11.89Mb

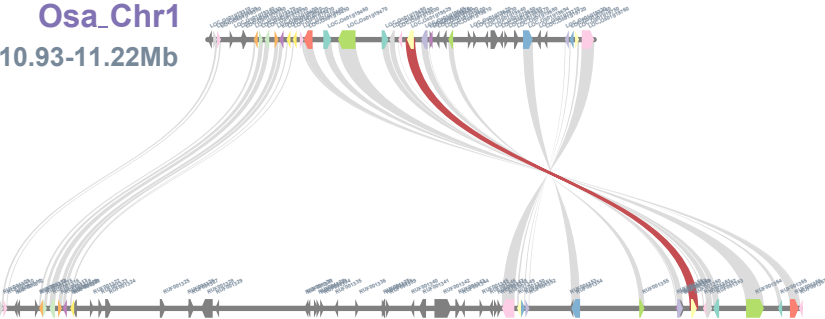

# LOC\_Os01g19548 RUF001357

Osa\_Chr1  
10.93-11.22Mb

Oru\_Chr1  
11.28-11.89Mb

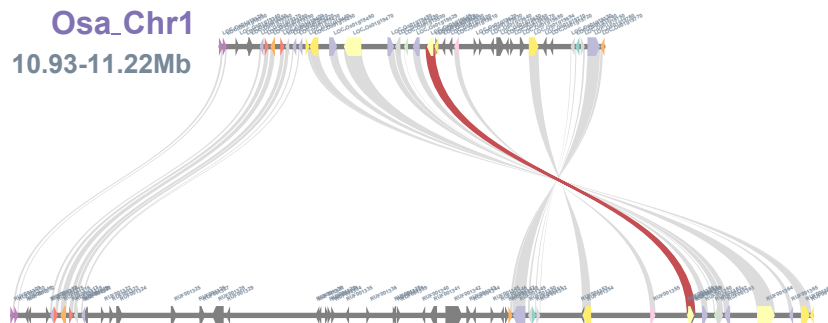

**LOC\_Os01g25270 RUF001627**

## Osa\_Chr1

14.13-14.48Mb

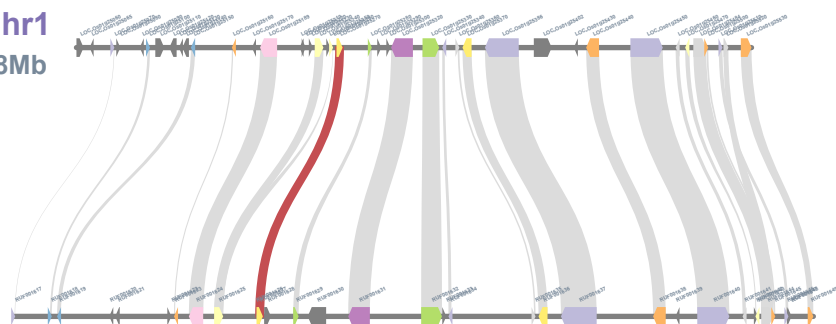

Oru\_Chr1

14.55-14.96Mb

# LOC\_Os01g25530 RUF001649

Osa\_Chr1  
14.26-14.60Mb

Oru\_Chr1  
14.67-15.05Mb

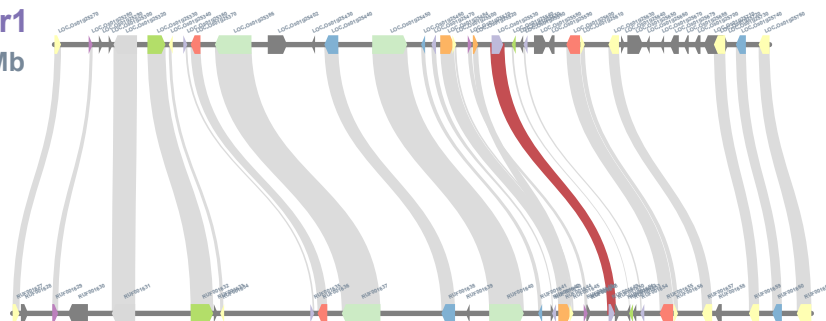

LOC\_Os01g27650 RUF001730

Osa\_Chr1  
15.36-15.58Mb

Oru\_Chr1  
15.71-15.91Mb

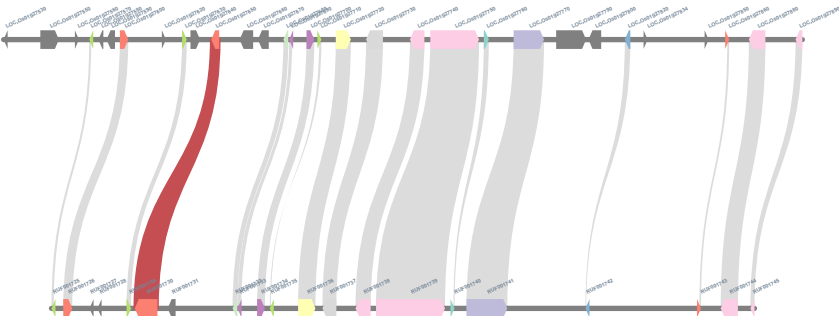

LOC\_Os01g29430 RUF001799

Osa\_Chr1  
16.36-16.58Mb

Oru\_Chr1  
16.64-16.82Mb

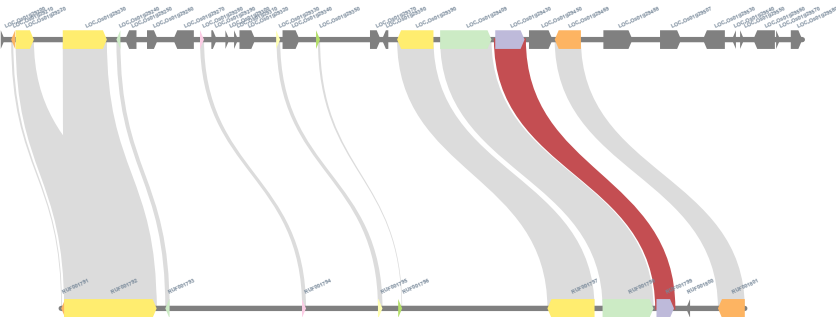

# LOC\_Os01g33070 RUF001876

Osa\_Chr1  
18.03-18.35Mb

Oru\_Chr1  
17.77-18.12Mb

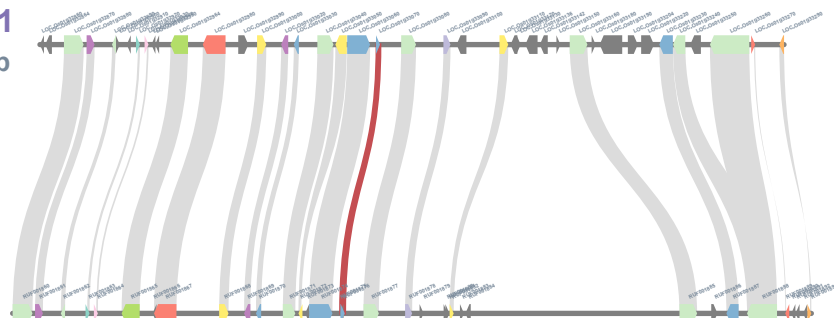



LOC\_Os01g36540 RUF002036

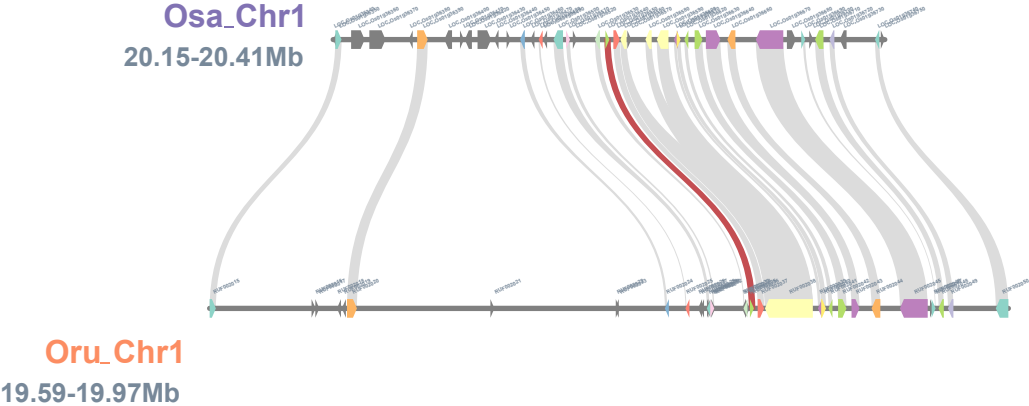

# LOC\_Os01g36600 RUF002039

Osa\_Chr1  
20.20-20.47Mb

Oru\_Chr1  
19.81-20.02Mb

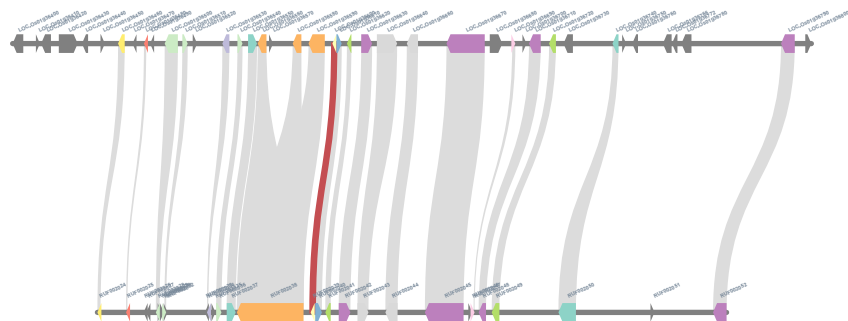

## LOC\_Os01g36610 RUF002040

Osa\_Chr1  
20.21-20.48Mb

Oru\_Chr1  
19.81-20.02Mb

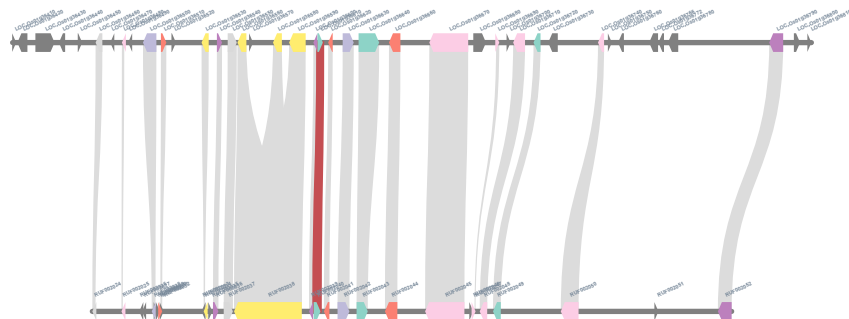

# LOC\_Os01g40680 RUF002304

Osa\_Chr1  
22.85-23.13Mb

Oru\_Chr1  
22.27-22.52Mb

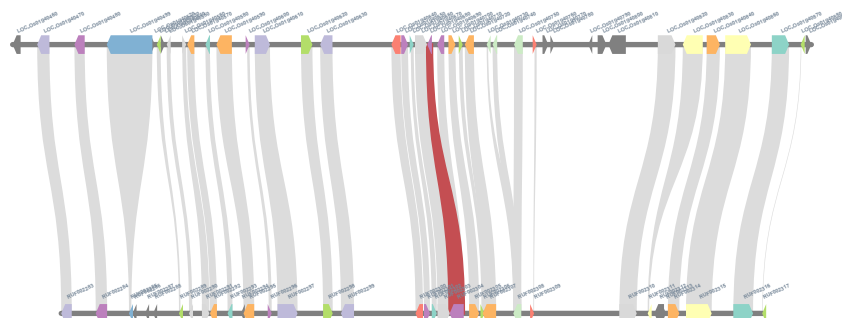

LOC\_Os01g40720 RUF002307

Osa\_Chr1  
22.90-23.16Mb

Oru\_Chr1  
22.31-22.55Mb

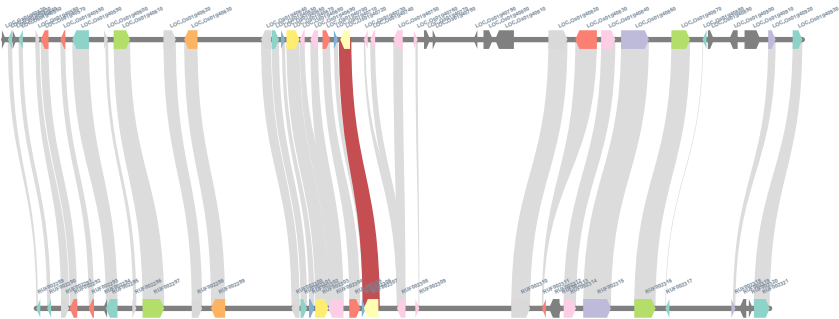

LOC\_Os01g41650 RUF002373

Osa\_Chr1  
23.47-23.71Mb

Oru\_Chr1  
22.85-23.06Mb

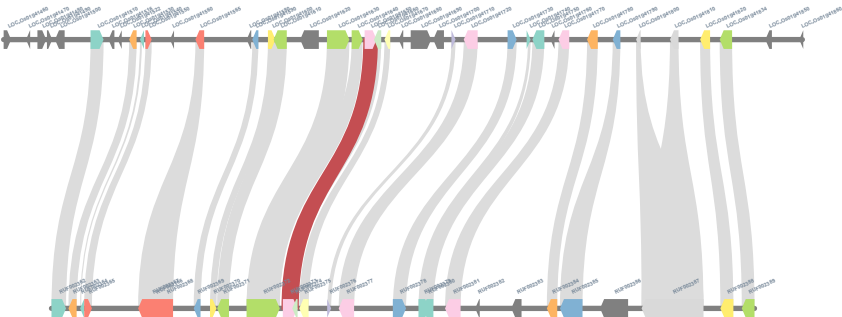

**LOC\_Os01g42280 RUF002433**

## Osa\_Chr1

23.84-24.17Mb

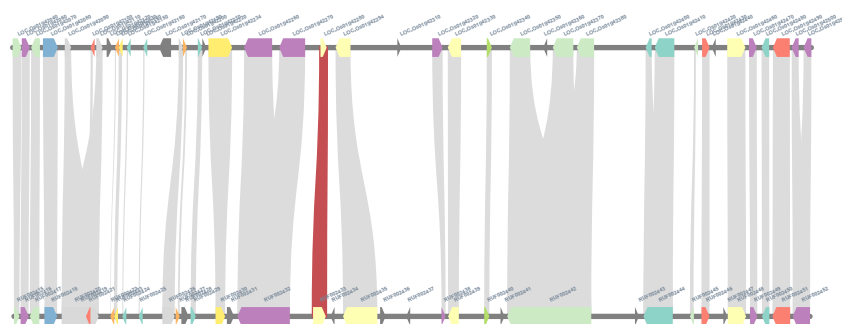

Oru\_Chr1

**23.25-23.58Mb**

## LOC\_Os01g42620 RUF002459

**Osa\_Chr1**  
24.10-24.38Mb

**Oru\_Chr1**  
23.51-23.84Mb

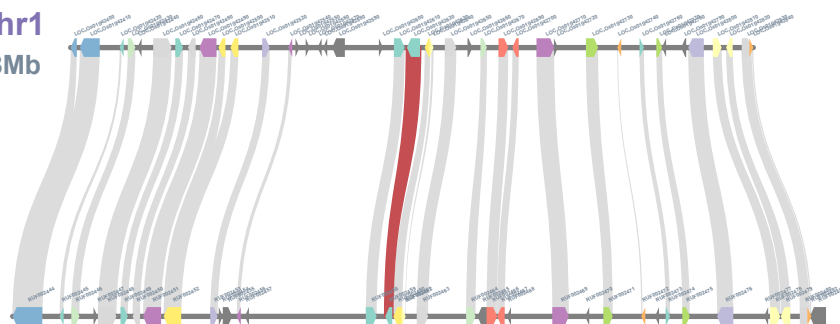



LOC\_Os01g46230 RUF002698

Osa\_Chr1  
26.12-26.42Mb

Oru\_Chr1  
25.50-25.77Mb

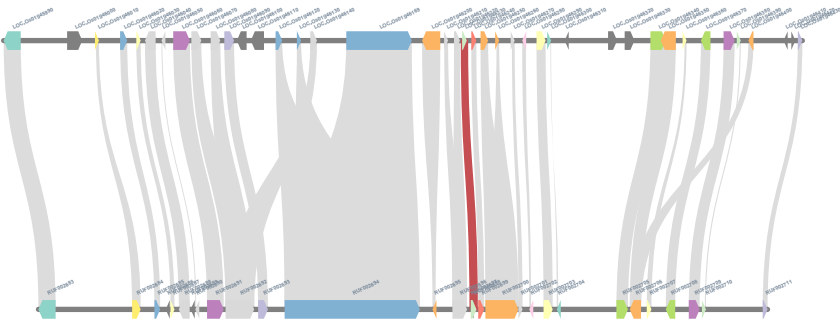

**LOC\_Os01g48140 RUF002832**

Osa\_Chr1  
27.43-27.72Mb

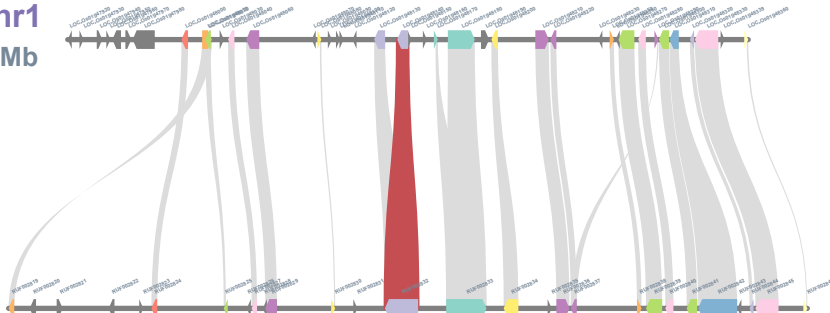

Oru\_Chr1  
26.59-26.93Mb

LOC\_Os01g48380 RUF002848

Osa\_Chr1  
27.58-27.86Mb

Oru\_Chr1  
26.78-27.08Mb

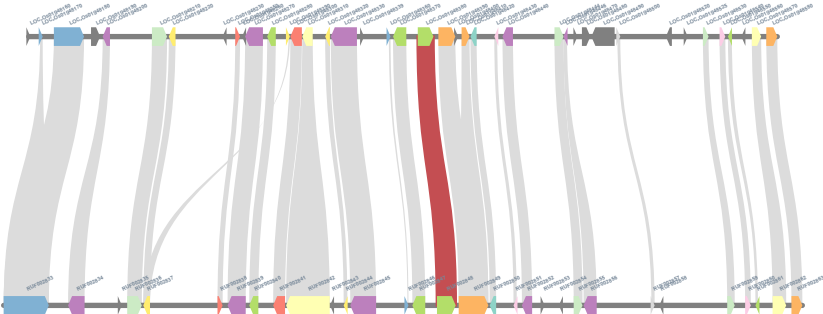

**LOC\_Os01g51790 RUF003138**

## Osa\_Chr1

**29.64-29.89Mb**

Oru\_Chr1

**28.89-29.13Mb**

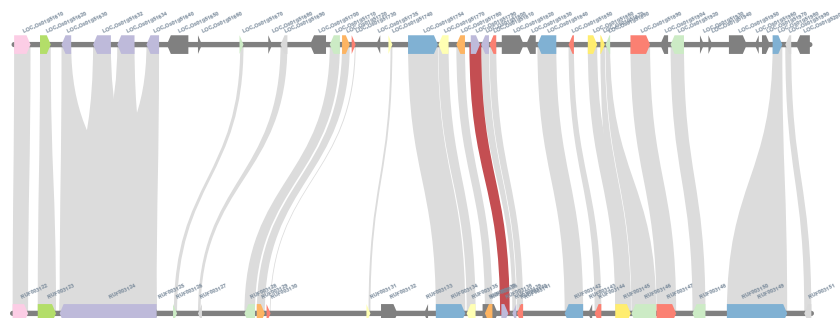

# LOC\_Os01g51810 RUF003140

Osa\_Chr1  
29.65-29.90Mb

Oru\_Chr1  
28.90-29.13Mb

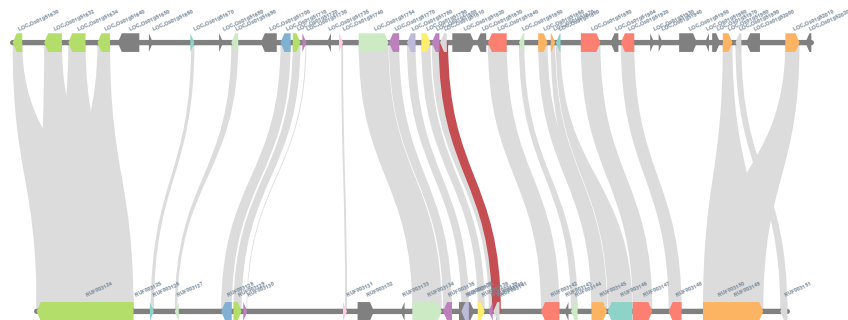

# LOC\_Os01g53610 RUF003287

Osa\_Chr1  
30.66-30.94Mb

Oru\_Chr1  
29.87-30.16Mb

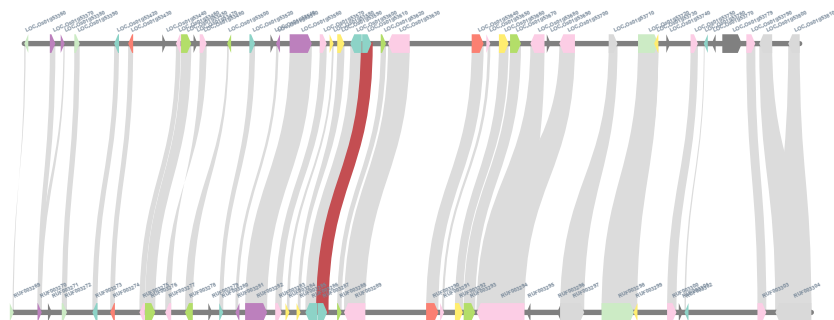

# LOC\_Os01g55070 RUF003408

Osa\_Chr1  
31.56-31.81Mb

Oru\_Chr1  
30.78-31.03Mb

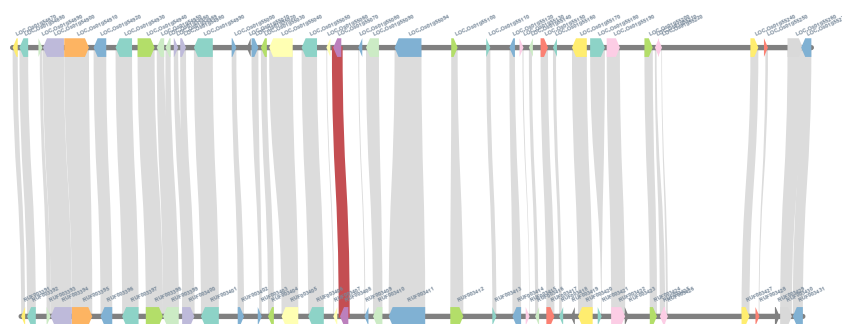

# LOC\_Os01g55960 RUF003492

Osa\_Chr1  
32.11-32.34Mb

Oru\_Chr1  
31.34-31.54Mb

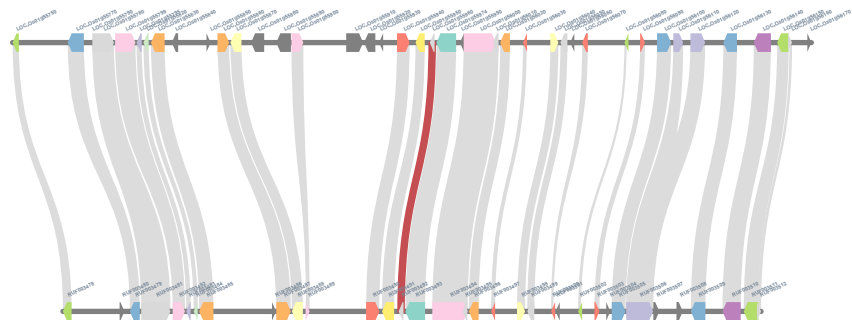



LOC\_Os01g57410 RUF003604

Osa\_Chr1  
33.04-33.30Mb

Oru\_Chr1  
32.22-32.40Mb

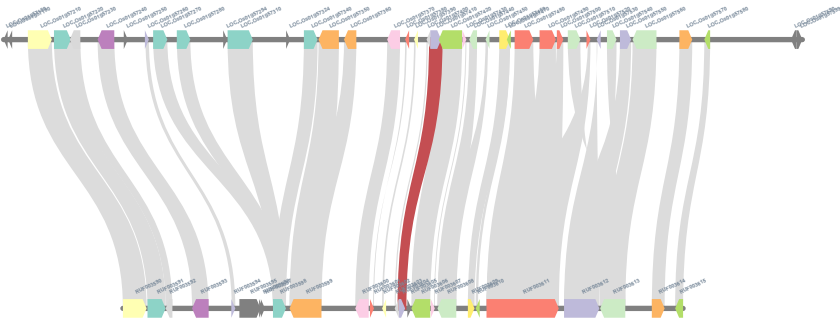

## LOC\_Os01g58630 RUF003643

**Osa\_Chr1**  
33.78-33.97Mb

**Oru\_Chr1**  
1.51-1.67Mb

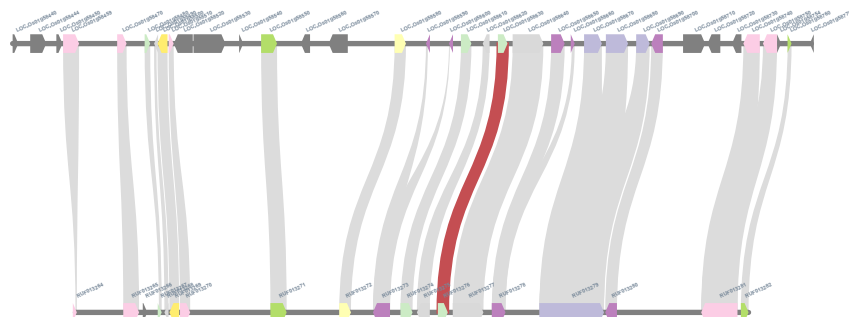

LOC\_Os01g59890 RUF003683

Osa\_Chr1  
34.51-34.77Mb

Oru\_Chr1  
32.92-33.18Mb

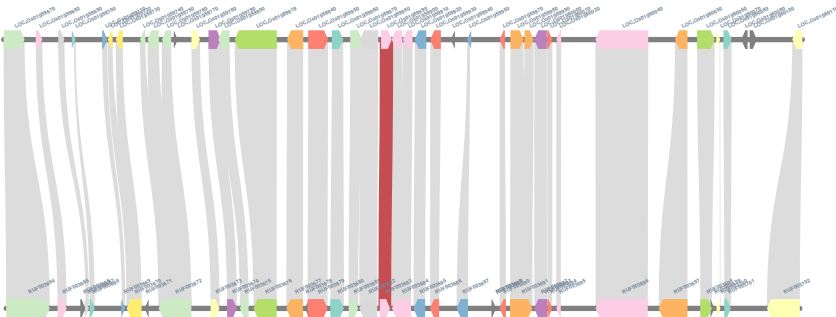

**LOC\_Os01g60000 RUF003692**

## Osa\_Chr1

34.57-34.82Mb

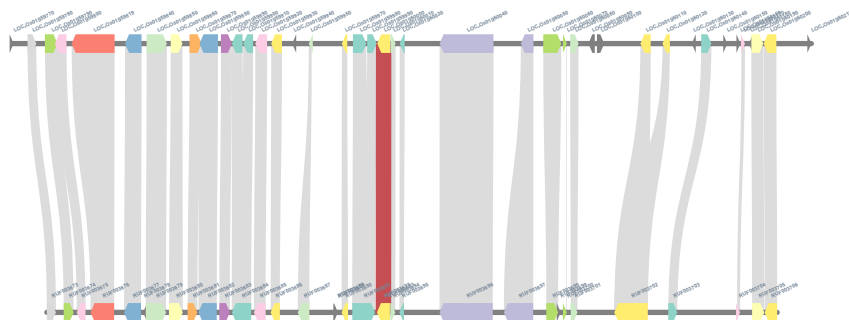

Oru\_Chr1

32.98-33.22Mb

**LOC Os01g60010 RUF003694**

## Osa\_Chr1

34.57-34.83Mb

Oru\_Chr1

## 32.98-33.22Mb

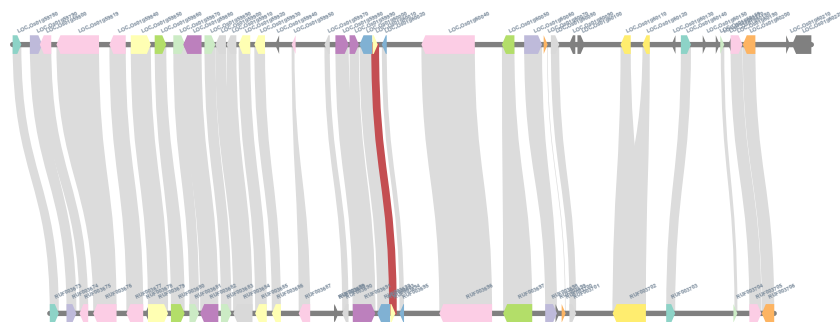

LOC\_Os01g60250 RUF003710

Osa\_Chr1  
34.71-34.98Mb

Oru\_Chr1  
33.11-33.38Mb

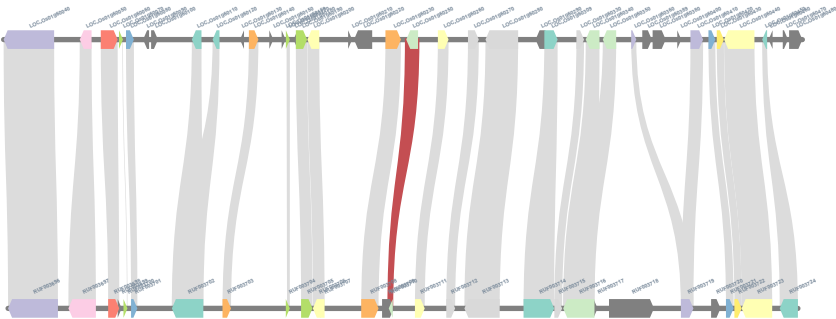

## LOC\_Os01g60430 RUF003722

Osa\_Chr1  
34.80-35.06Mb

Oru\_Chr1  
33.21-33.46Mb

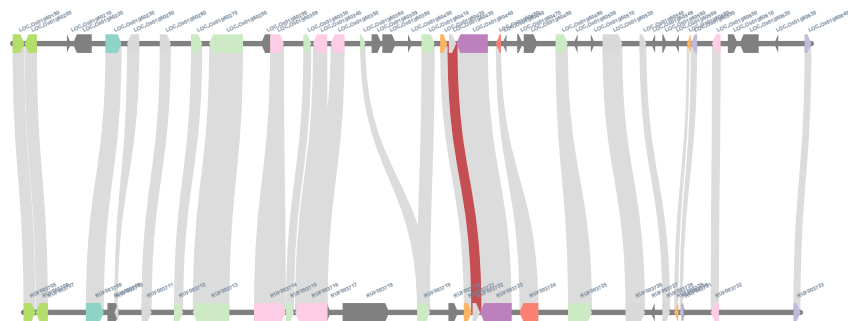

## LOC\_Os01g62220 RUF003865

Osa\_Chr1  
35.89-36.15Mb

Oru\_Chr1  
34.28-34.55Mb

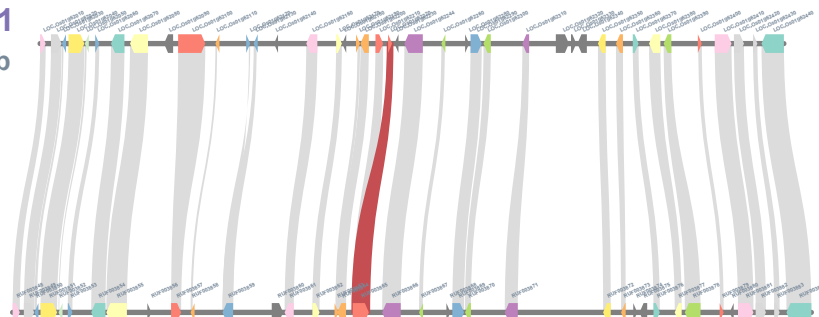



LOC\_Os01g62910 RUF003922

Osa\_Chr1  
36.31-36.59Mb

Oru\_Chr1  
34.73-34.95Mb

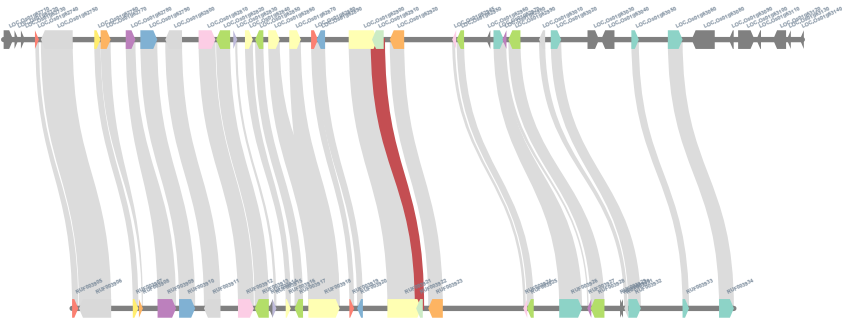

LOC\_Os01g63400 RUF003951

Osa Chr1  
36.62-36.91Mb

Ora Chr1  
34.98-35.23Mb

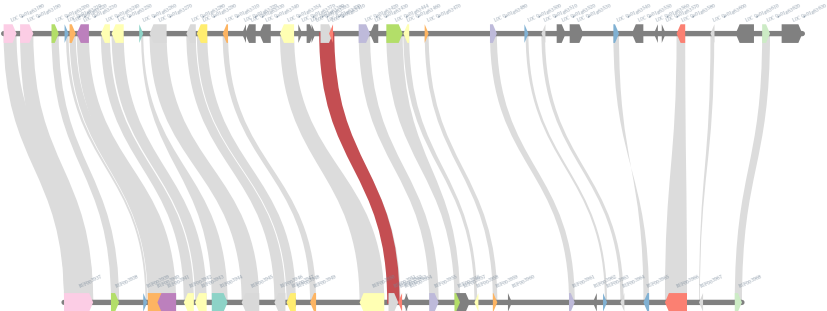

**LOC\_Os01g65840 RUF004142**

## Osa\_Chr1

### 38.11-38.33Mb

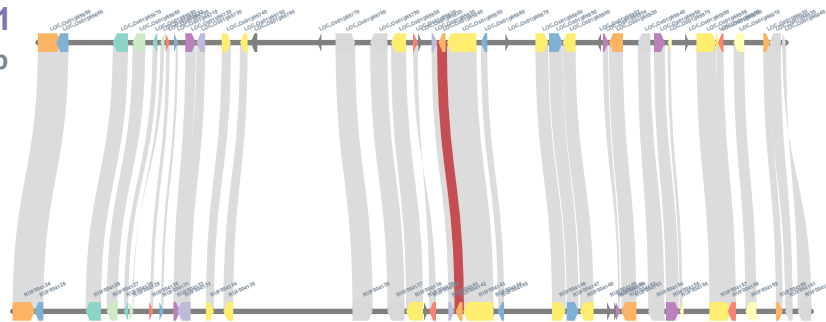

Oru\_Chr1

### 36.43-36.65Mb

# LOC\_Os01g66160 RUF004172

Osa\_Chr1  
38.29-38.56Mb

Oru\_Chr1  
36.62-36.87Mb

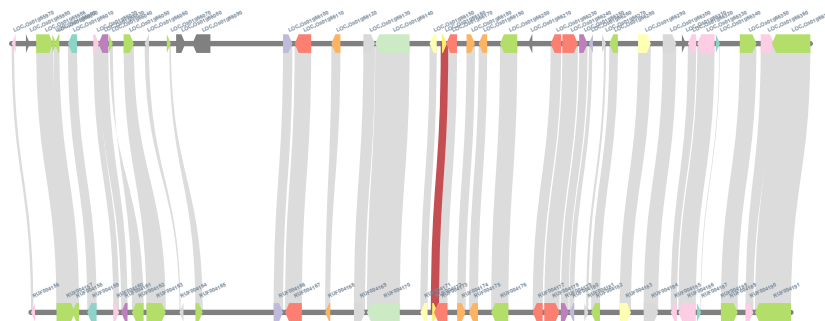

## LOC\_Os01g67210 RUF004256

Osa\_Chr1  
38.90-39.14Mb

Oru\_Chr1  
37.21-37.45Mb

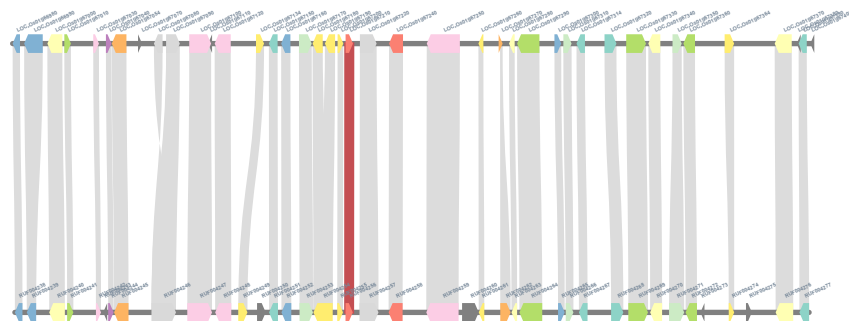

**LOC\_Os01g68070 RUF004332**

## Osa\_Chr1

### 39.44-39.70Mb

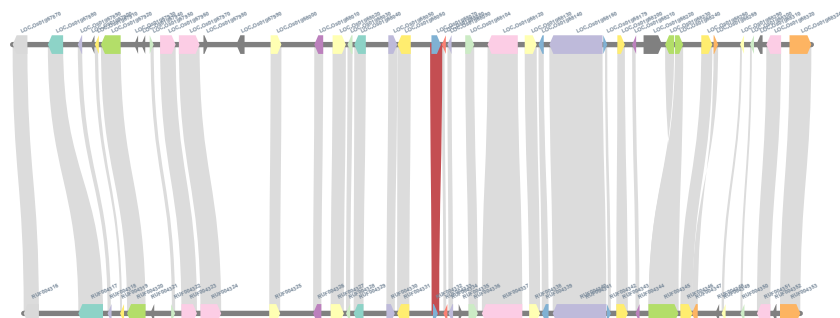

Oru\_Chr1

37.77-38.03Mb

LOC\_Os01g68490 RUF004365

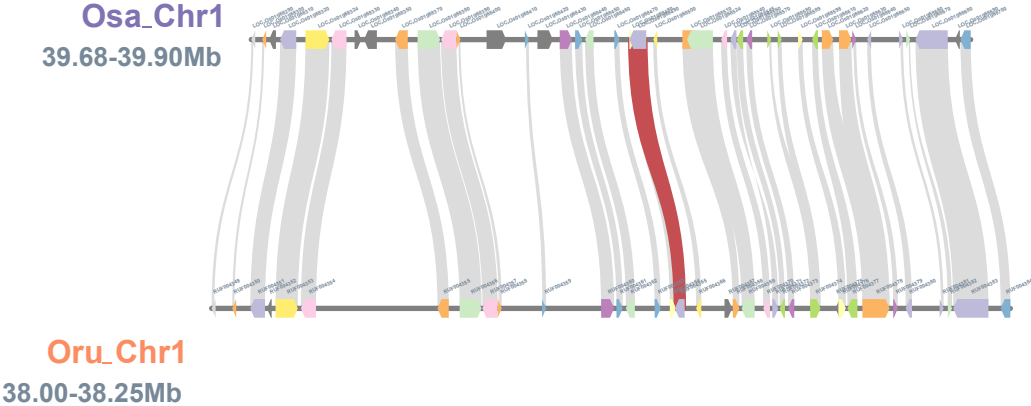

# LOC\_Os01g68524 RUF004369

Osa\_Chr1  
39.69-39.92Mb

Oru\_Chr1  
38.01-38.27Mb

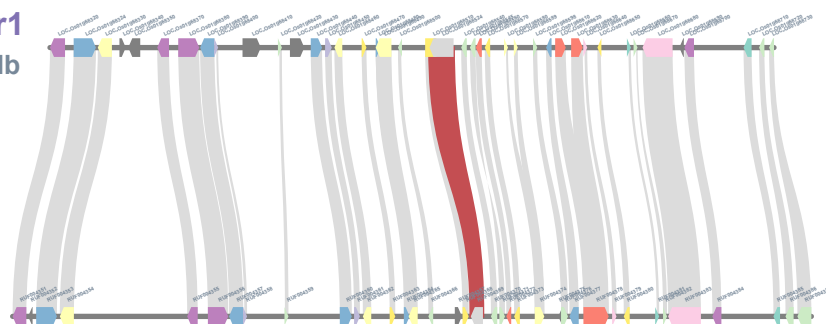



# LOC\_Os01g68610 RUF004377

Osa\_Chr1  
39.74-39.98Mb

Oru\_Chr1  
38.09-38.32Mb

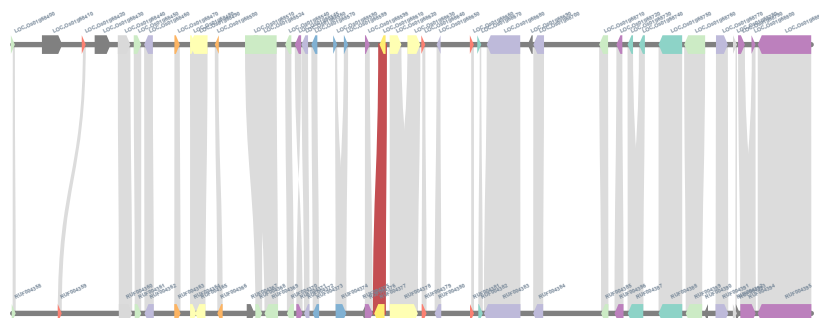

# LOC\_Os01g71180 RUF004565

Osa\_Chr1  
41.09-41.37Mb

Oru\_Chr1  
39.50-39.79Mb

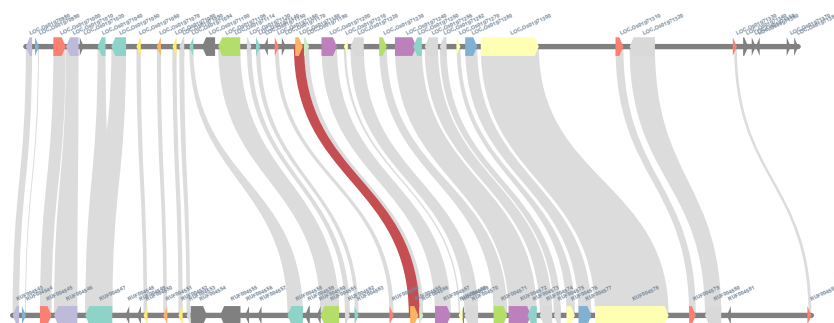

LOC\_Os01g72930 RUF004695

Osa\_Chr1  
42.18-42.42Mb

Oru\_Chr1  
40.54-40.78Mb

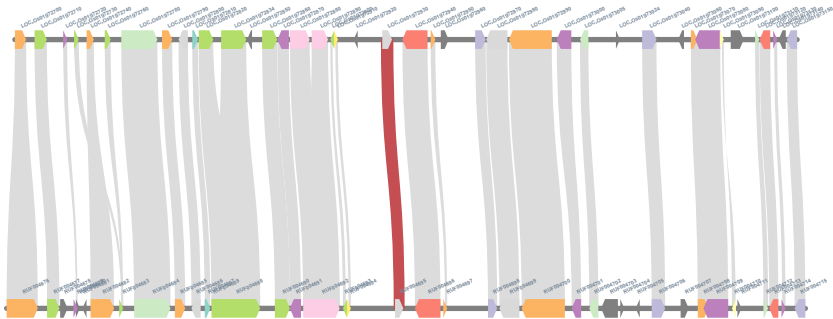

# LOC\_Os01g73950 RUF004777

Osa\_Chr1  
42.71-42.95Mb

Oru\_Chr1  
41.04-41.26Mb

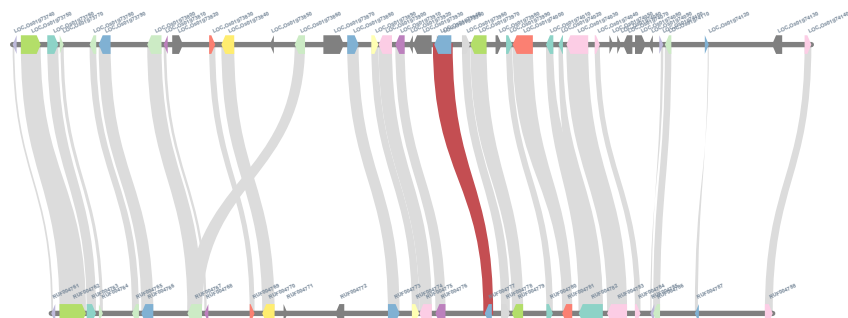

## LOC\_Os01g74600 RUF004823

**Osa\_Chr1**  
43.09-43.27Mb

**Oru\_Chr1**  
41.37-41.51Mb

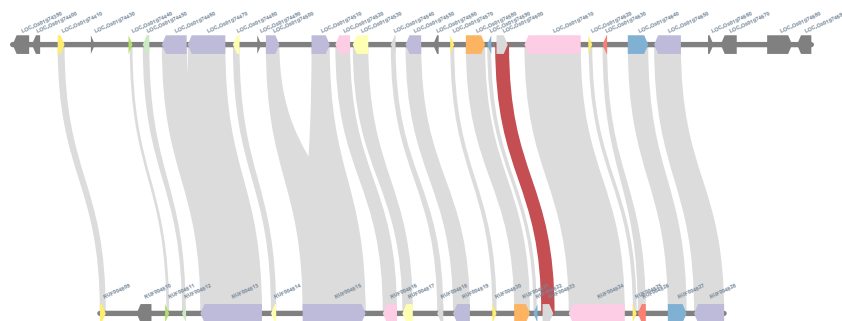

# LOC\_Os02g01610 RUF004886

Osa\_Chr2  
0.24-0.45Mb

Oru\_Chr2  
0.24-0.38Mb

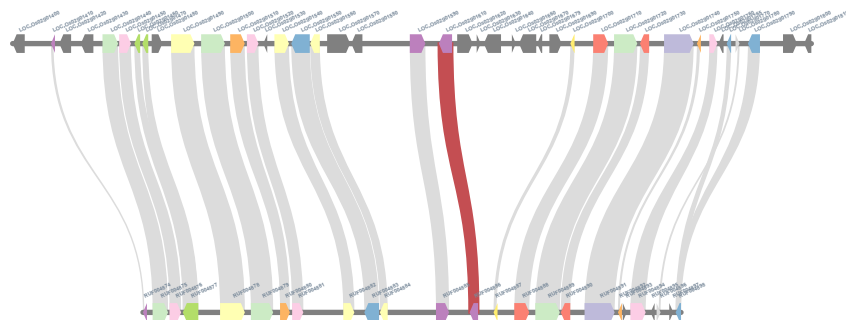

**LOC\_Os02g02020 RUF004921**

## Osa\_Chr2

### 0.46-0.72Mb

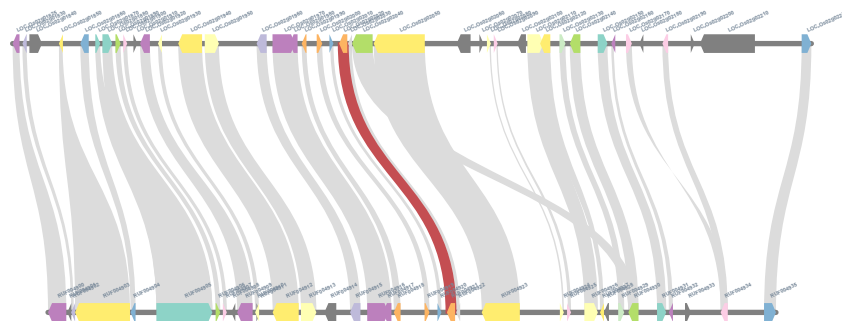

## Oru\_Chr2

## 0.40-0.63Mb

## LOC\_Os02g02590 RUF004960

**Osa\_Chr2**  
0.80-1.07Mb

**Oru\_Chr2**  
0.71-0.99Mb

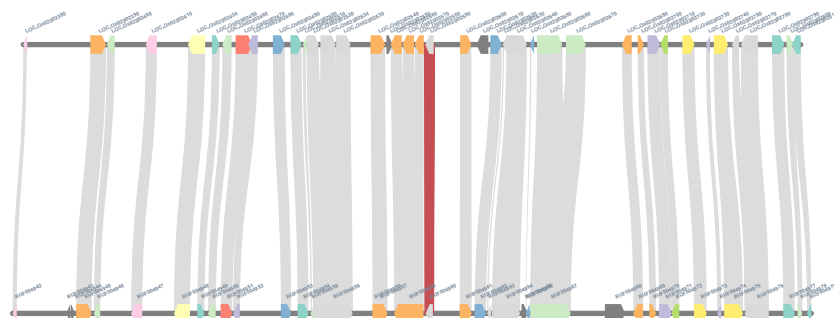



LOC\_Os02g02740 RUF004974

Osa\_Chr2  
0.91-1.16Mb

Oru\_Chr2  
0.81-1.07Mb

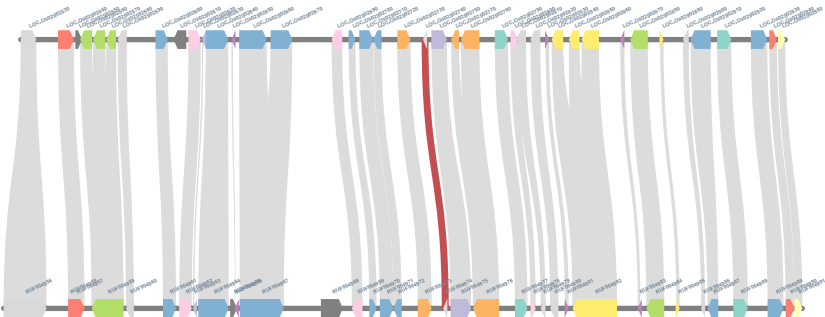

LOC\_Os02g02950 RUF004991

Osa\_Chr2

1.04-1.26Mb

Oru\_Chr2

0.96-1.17Mb

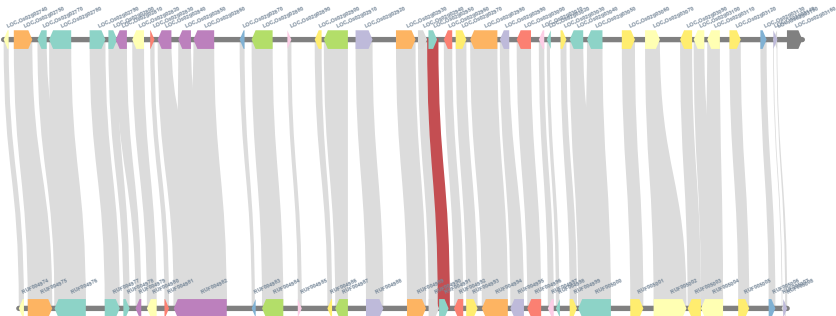

LOC\_Os02g03420 RUF005025

Osa\_Chr2  
1.27-1.48Mb

Oru\_Chr2  
1.18-1.40Mb

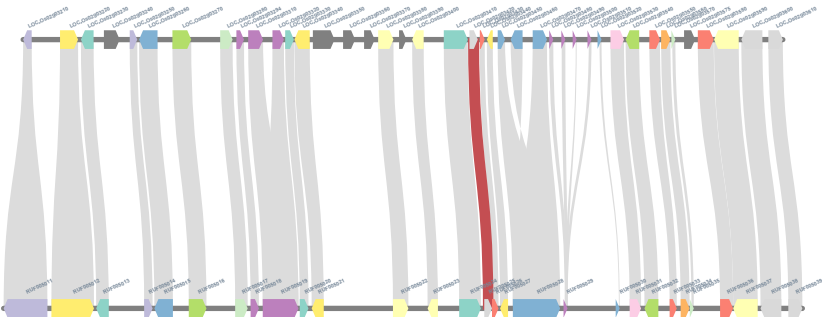

LOC\_Os02g03530 RUF005031

Osa\_Chr2  
1.34-1.56Mb

Oru\_Chr2  
1.26-1.48Mb

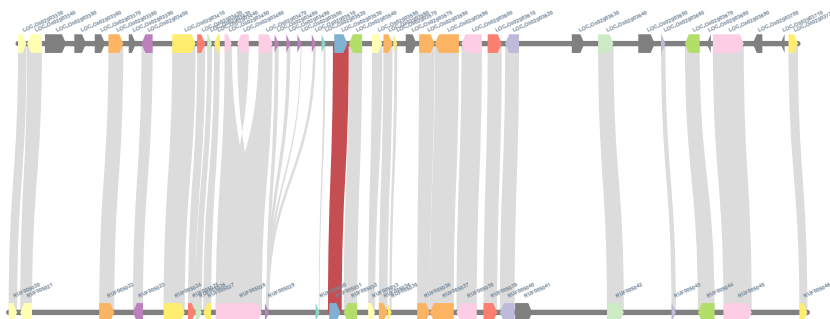

**LOC Os02g03930 RUF005061**

## Osa\_Chr2

## 1.56-1.80Mb

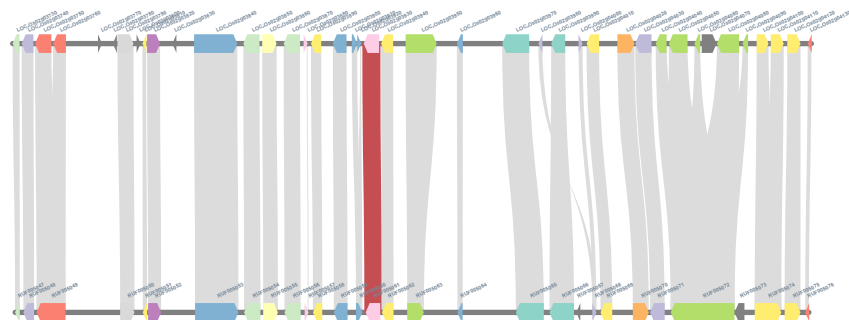

## Oru\_Chr2

1.49-1.72Mb

# LOC\_Os02g03970 RUF005065

Osa\_Chr2  
1.59-1.83Mb

Oru\_Chr2  
1.52-1.75Mb

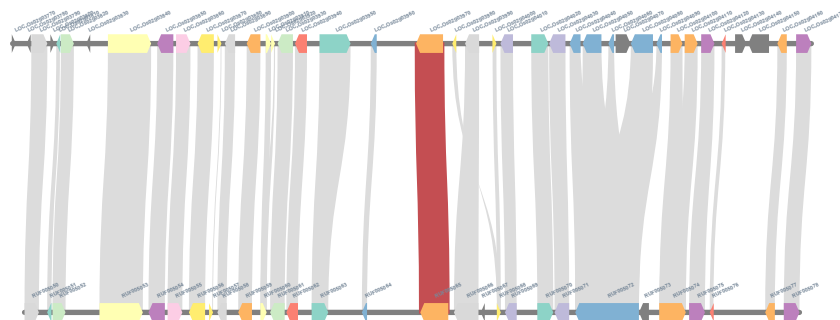

## LOC\_Os02g05720 RUF005171

Osa\_Chr2  
2.67-2.95Mb

Oru\_Chr2  
2.37-2.63Mb

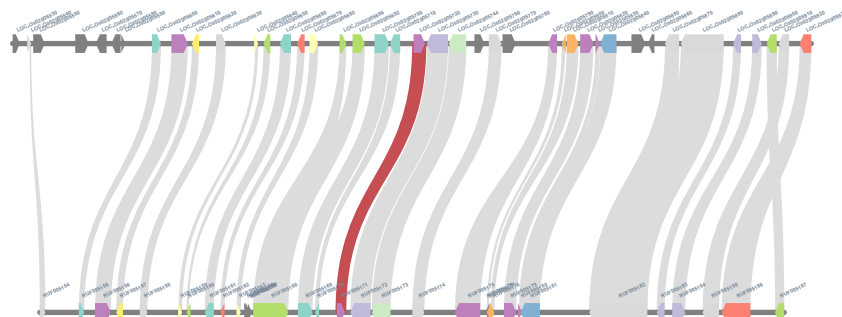

# LOC\_Os02g06880 RUF005238

Osa\_Chr2  
3.35-3.64Mb

Oru\_Chr2  
2.99-3.22Mb

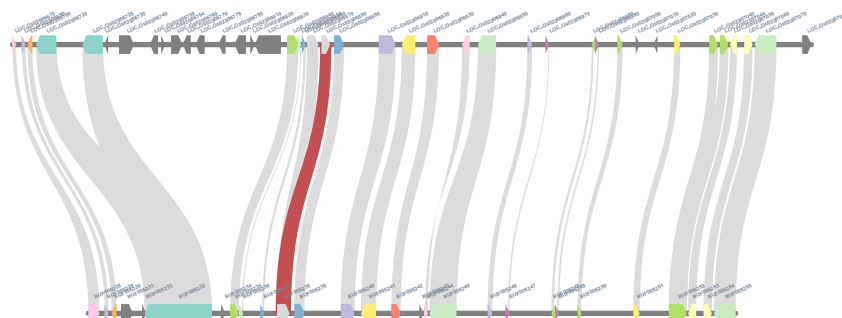



LOC\_Os02g07050 RUF005253

Osa\_Chr2  
3.46-3.72Mb

Oru\_Chr2  
3.04-3.32Mb

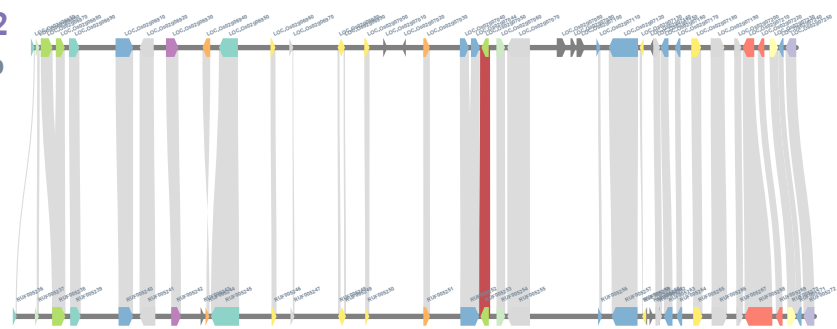

# LOC\_Os02g09800 RUF005437

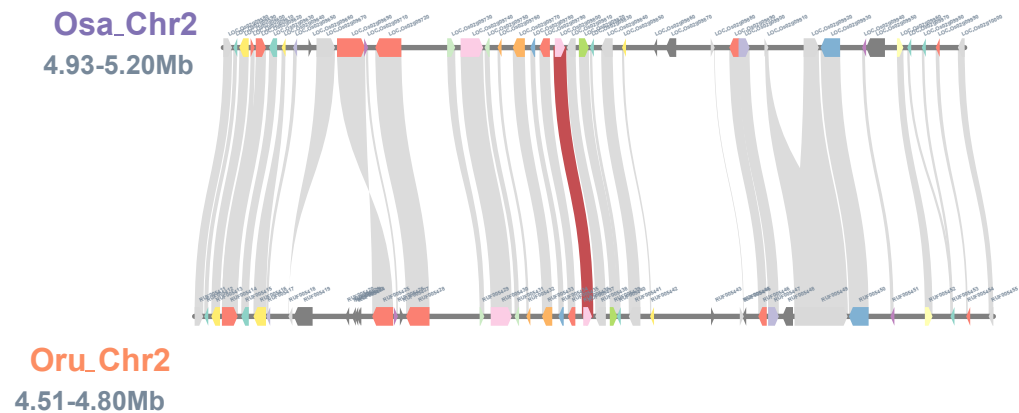

**LOC\_Os02g13340 RUF005719**

Osa\_Chr2  
6.99-7.26Mb

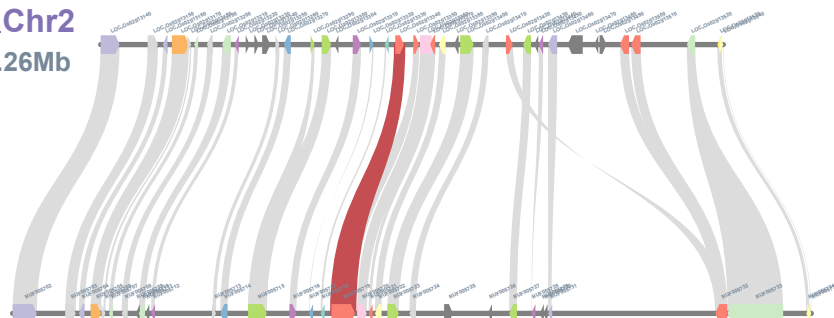

Oru\_Chr2  
6.89-7.25Mb

## LOC\_Os02g16650 RUF005942

Osa\_Chr2  
9.40-9.62Mb

Oru\_Chr2  
9.09-9.30Mb

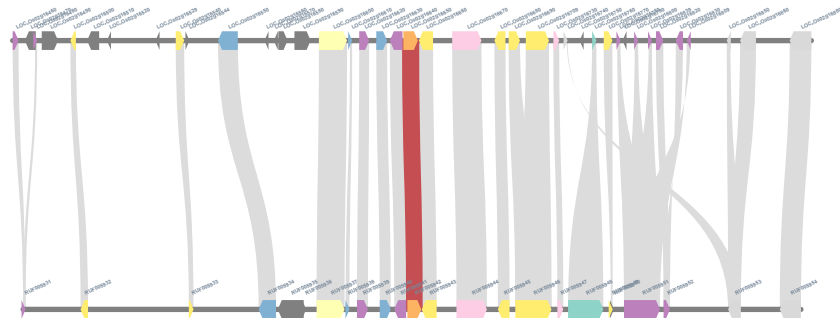

# LOC\_Os02g20160 RUF006133

Osa\_Chr2  
11.74-12.00Mb

Oru\_Chr2  
11.21-11.42Mb

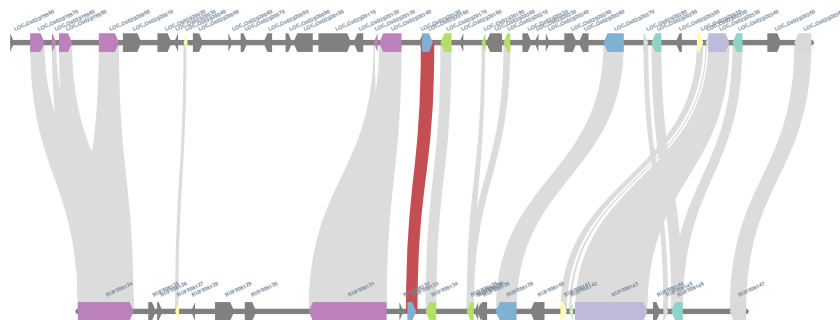

# LOC\_Os02g21580 RUF006243

Osa\_Chr2  
12.66-12.95Mb

Oru\_Chr2  
12.12-12.47Mb

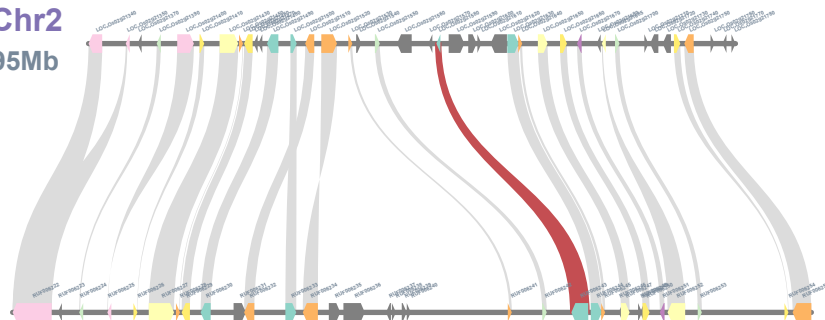

# LOC\_Os02g26890 RUF006468

Osa\_Chr2  
15.69-15.93Mb

Oru\_Chr2  
15.55-15.76Mb

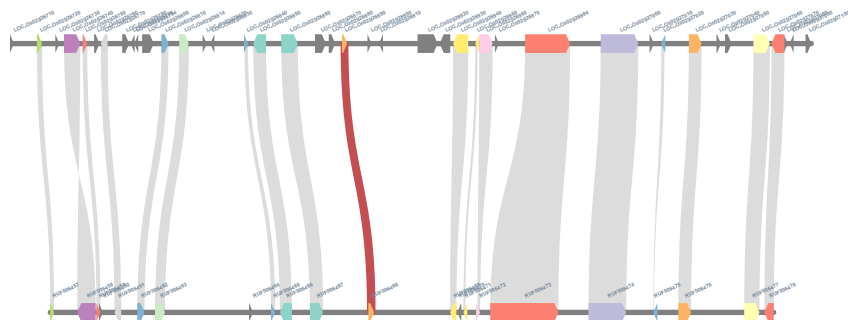

**LOC\_Os02g26940 RUF006469**

## Osa\_Chr2

**15.71-15.98Mb**

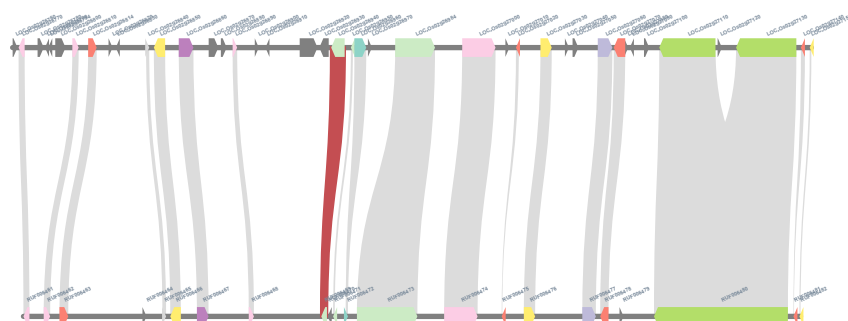

Oru\_Chr2

15.57-15.83Mb



# LOC\_Os02g27070 RUF006478

Osa\_Chr2  
15.77-16.06Mb

Oru\_Chr2  
15.62-15.86Mb

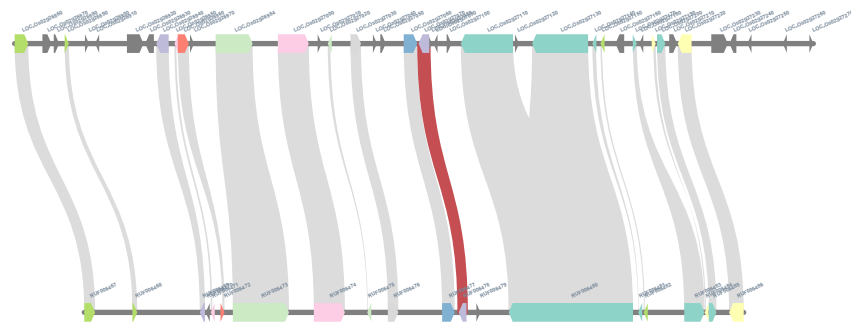

# LOC\_Os02g32780 RUF006808

Osa\_Chr2  
19.29-19.63Mb

Oru\_Chr2  
19.14-19.47Mb

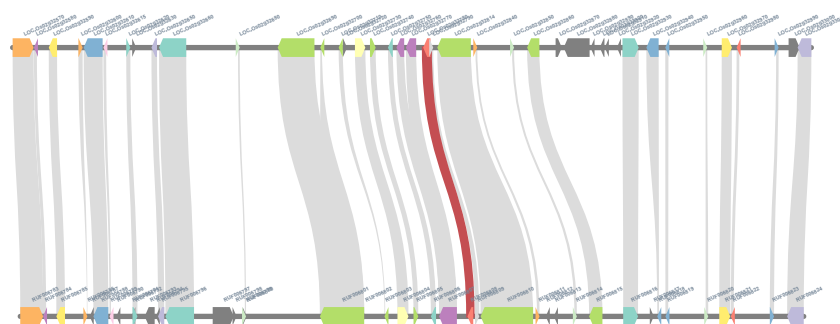

LOC\_Os02g34960 RUF006956

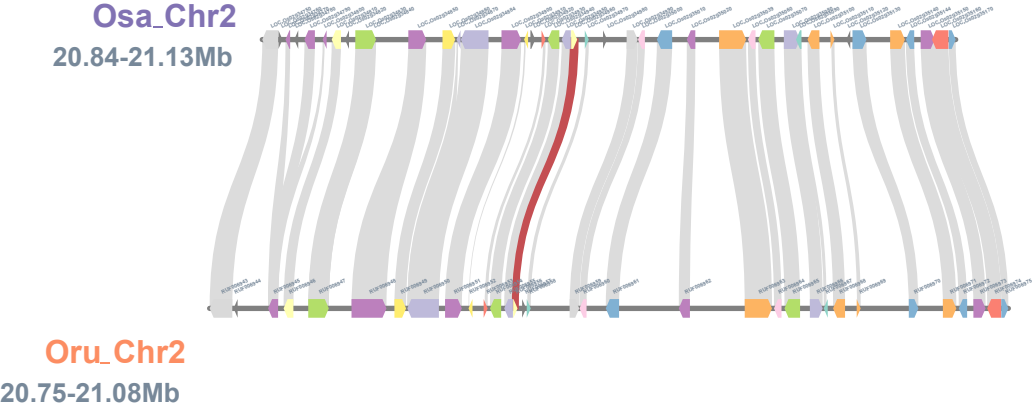

# LOC\_Os02g35750 RUF007019

Osa\_Chr2  
21.37-21.61Mb

Oru\_Chr2  
21.26-21.49Mb

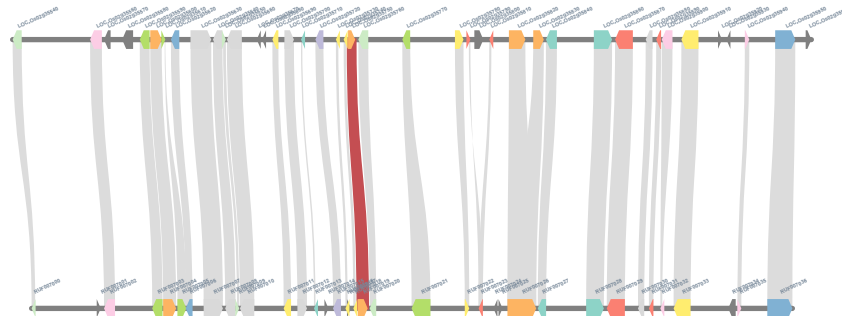

**LOC\_Os02g37140 RUF007128**

## Osa\_Chr2

22.29-22.56Mb

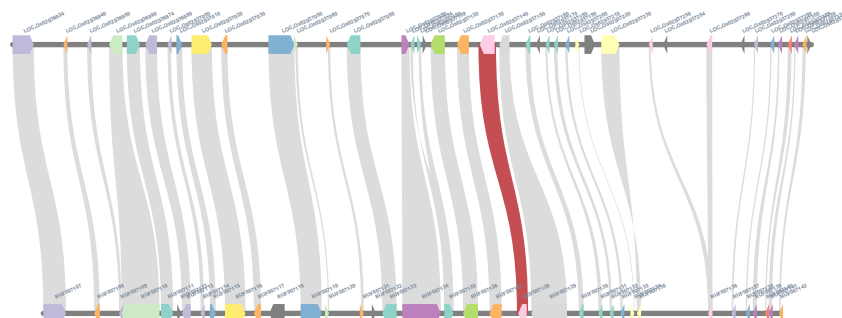

Oru\_Chr2

22.17-22.42Mb

## LOC\_Os02g38950 RUF007254

**Osa\_Chr2**  
23.43-23.65Mb

**Oru\_Chr2**  
23.17-23.40Mb

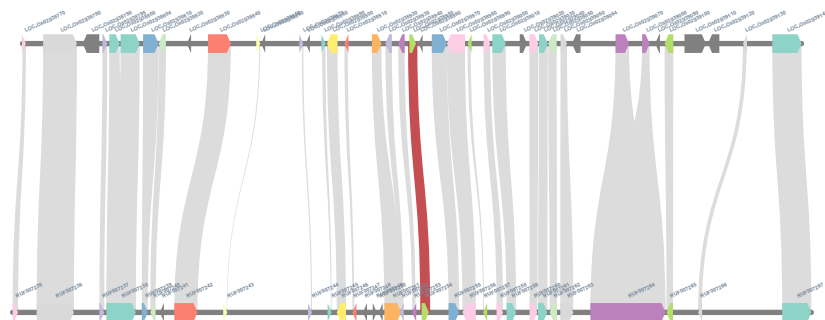

**LOC\_Os02g39820 RUF007343**

## Osa\_Chr2

**23.90-24.23Mb**

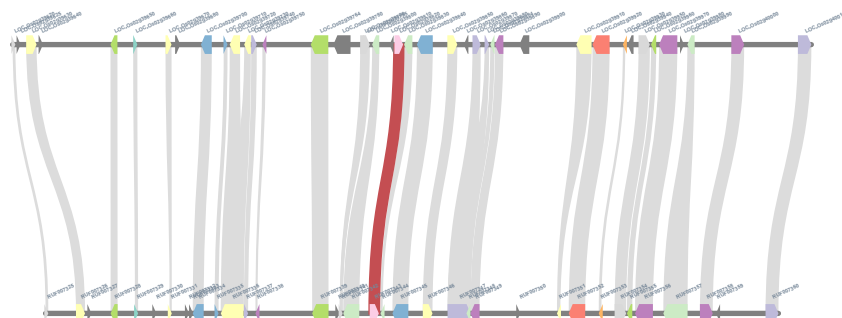

Oru\_Chr2

**23.66-23.95Mb**

## LOC\_Os02g40750 RUF007418

**Osa\_Chr2**  
24.58-24.82Mb

**Oru\_Chr2**  
24.28-24.52Mb

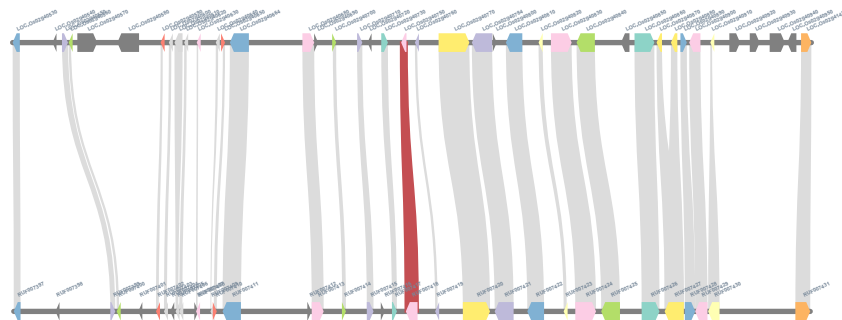



## LOC\_Os02g41560 RUF007444

Osa\_Chr2  
24.77-25.11Mb

Oru\_Chr2  
24.47-24.79Mb

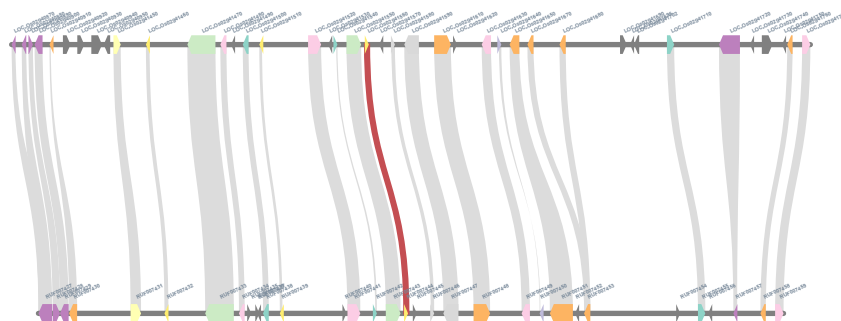

## LOC\_Os02g42210 RUF007492

Osa\_Chr2  
25.23-25.51Mb

Oru\_Chr2  
24.91-25.25Mb

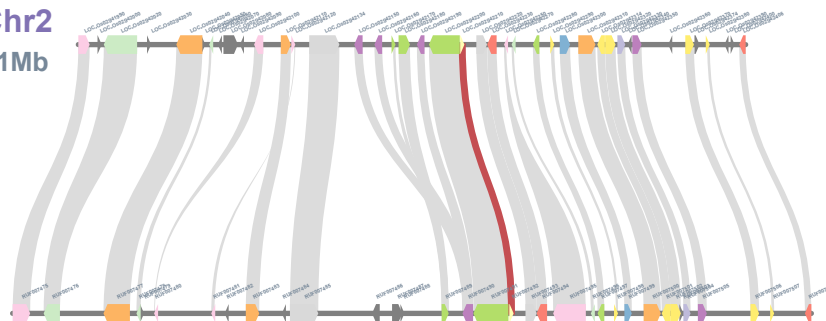

## LOC\_Os02g44970 RUF007722

Osa\_Chr2  
27.11-27.42Mb

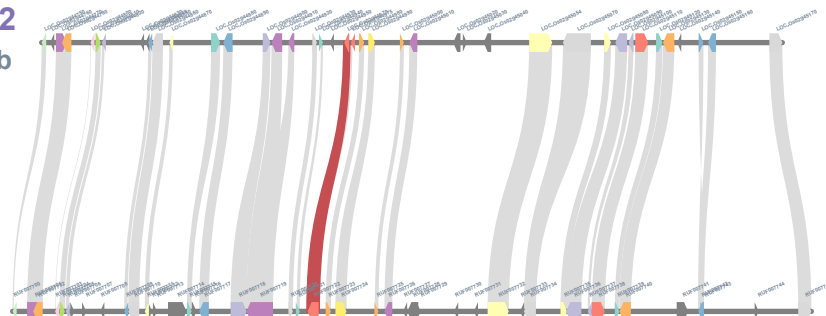

Oru\_Chr2  
26.70-27.03Mb

**LOC\_Os02g45590 RUF007784**

## Osa\_Chr2

**27.59-27.90Mb**

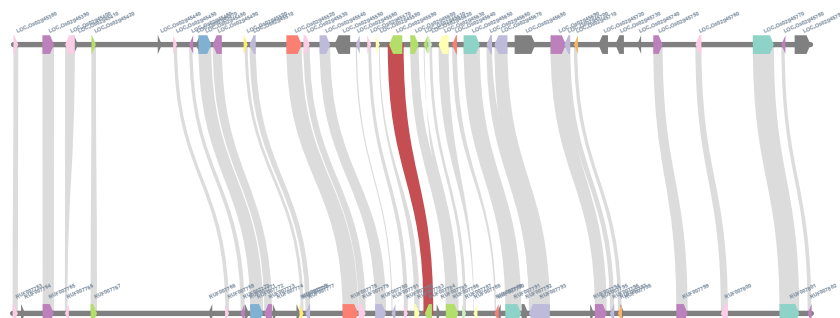

Oru\_Chr2

**27.18-27.49Mb**

# LOC\_Os02g46980 RUF007899

Osa\_Chr2  
28.57-28.81Mb

Oru\_Chr2  
28.15-28.39Mb

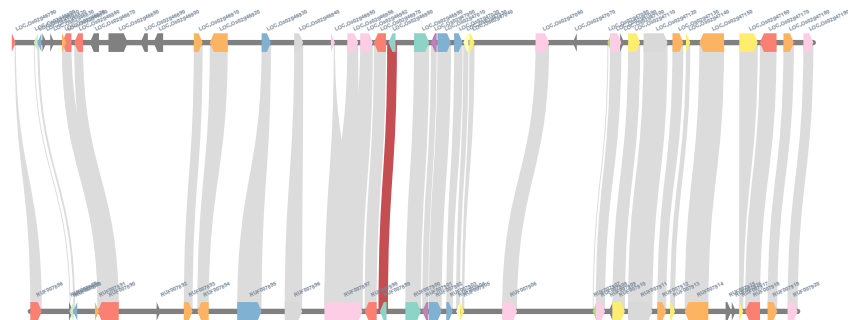

LOC\_Os02g47360 RUF007932

Osa\_Chr2  
28.79-29.06Mb

Oru\_Chr2  
28.37-28.64Mb

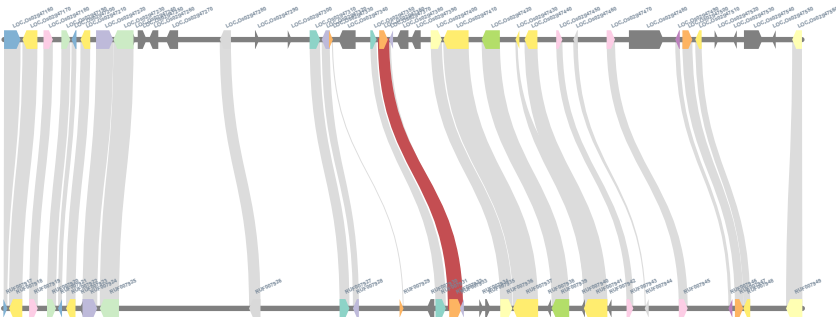

LOC\_Os02g48122 RUF007999

Osa\_Chr2  
29.32-29.57Mb

Oru\_Chr2  
28.93-29.18Mb

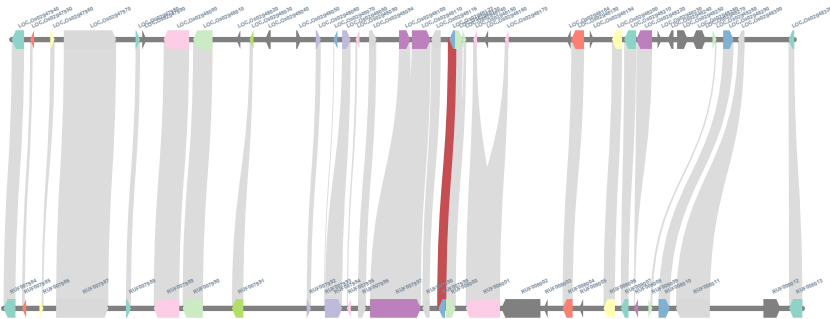

**LOC\_Os02g49830 RUF008147**

**Osa\_Chr2**  
30.33-30.56Mb

Oru\_Chr2  
29.92-30.20Mb

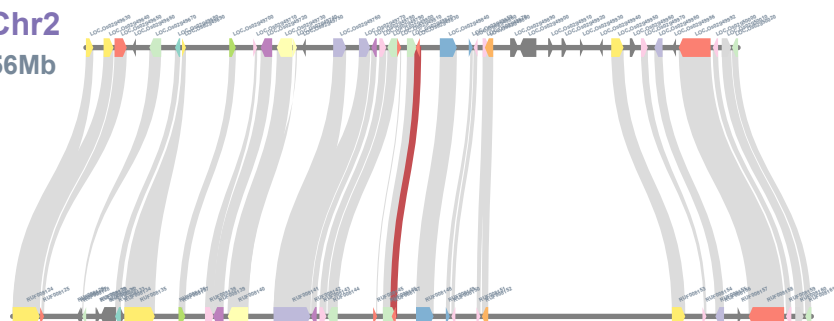



LOC\_Os02g50280 RUF008181

Osa\_Chr2  
30.58-30.80Mb

Oru\_Chr2  
30.22-30.41Mb

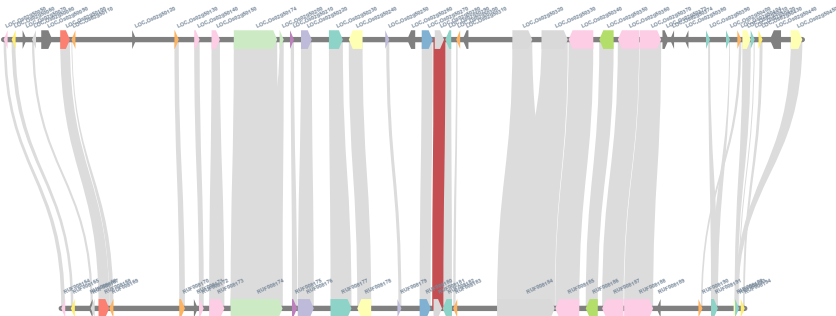

## LOC\_Os02g51480 RUF008284

**Osa\_Chr2**  
31.41-31.68Mb

**Oru\_Chr2**  
31.00-31.27Mb

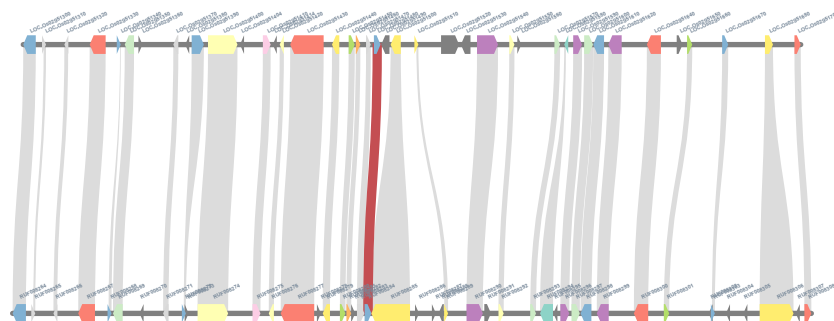

LOC\_Os02g52220 RUF008350

Osa\_Chr2  
31.84-32.09Mb

Oru\_Chr2  
31.46-31.66Mb

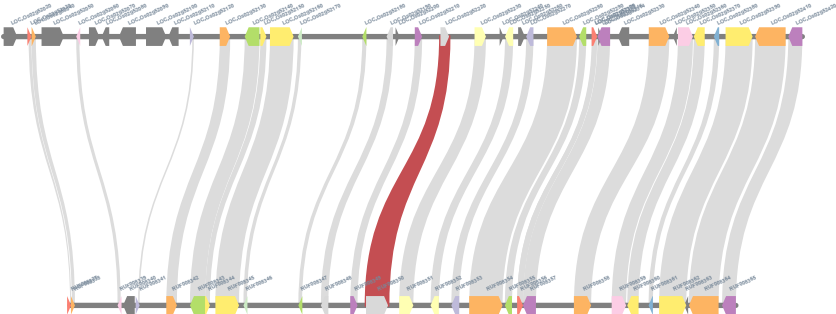

LOC\_Os02g53050 RUF008423

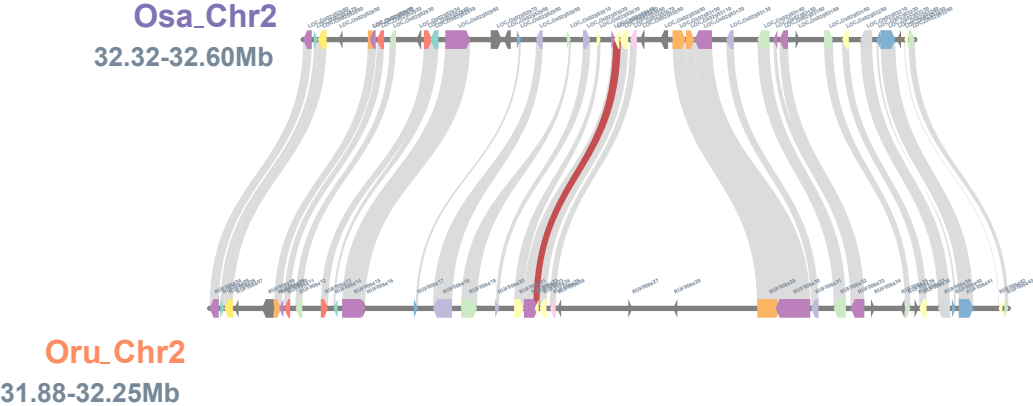

LOC\_Os02g55020 RUF008614

Osa\_Chr2  
33.57-33.82Mb

Oru\_Chr2  
33.44-33.69Mb

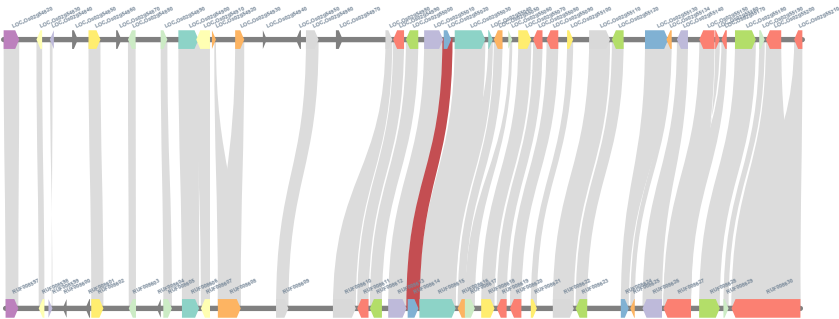

LOC\_Os02g55310 RUF008638

Osa\_Chr2  
33.76-34.01Mb

Oru\_Chr2  
33.62-33.86Mb

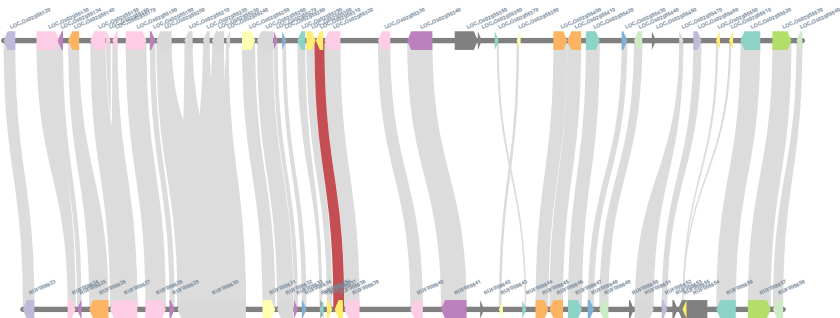

# LOC\_Os02g57340 RUF008792

Osa\_Chr2  
34.99-35.26Mb

Oru\_Chr2  
34.63-34.95Mb

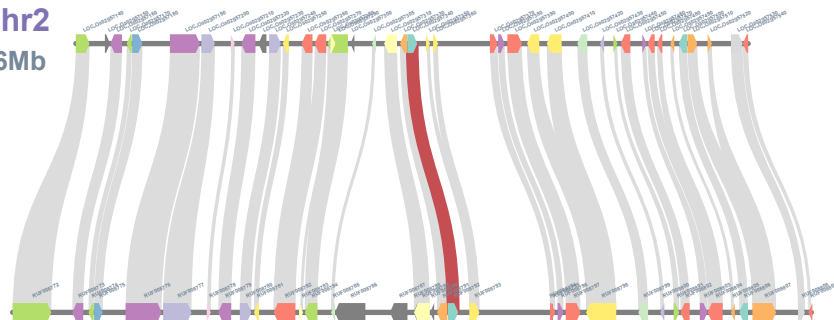

# LOC\_Os02g57800 RUF008832

Osa\_Chr2  
35.27-35.51Mb

Oru\_Chr2  
34.97-35.18Mb

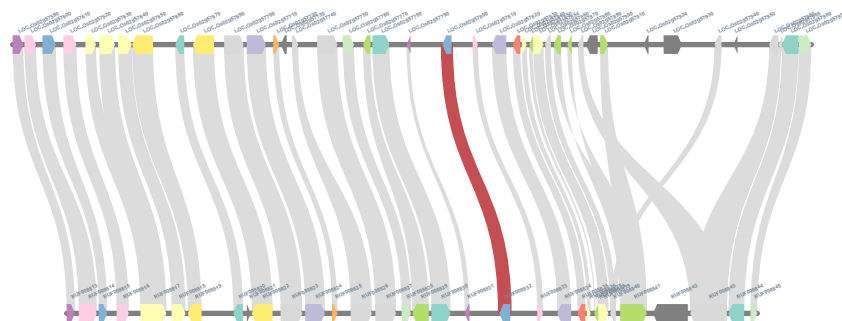



**LOC\_Os02g58139 RUF008856**

## Osa\_Chr2

**35.47-35.69Mb**

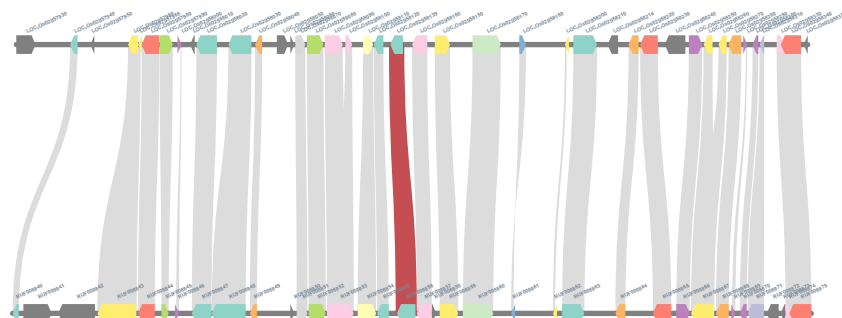

Oru\_Chr2

### 35.13-35.36Mb

**LOC\_Os02g58300 RUF008870**

## Osa\_Chr2

**35.55-35.77Mb**

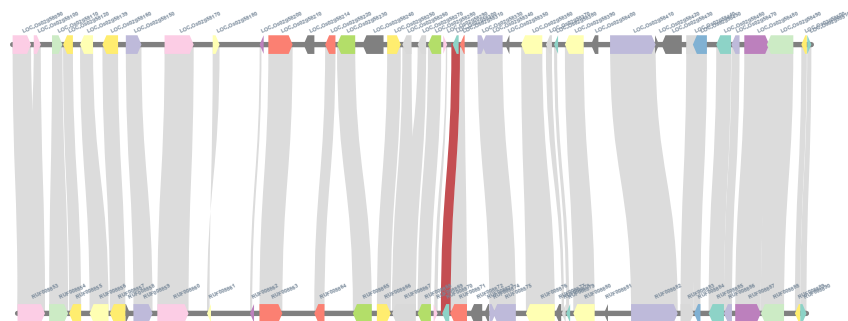

Oru\_Chr2

## 35.22-35.44Mb

LOC\_Os02g58330 RUF008874

Osa\_Chr2  
35.56-35.78Mb

Oru\_Chr2  
35.23-35.45Mb

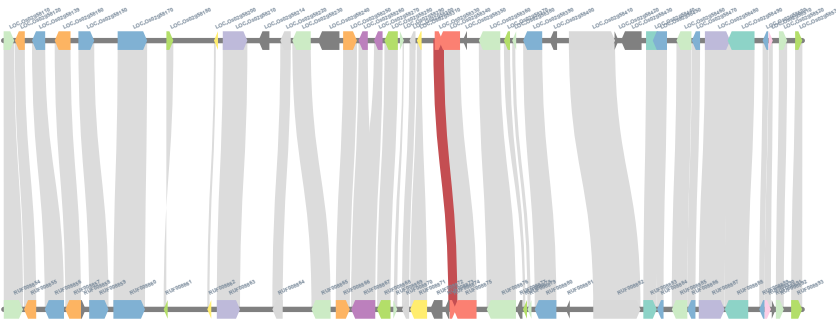

LOC\_Os02g58620 RUF008903

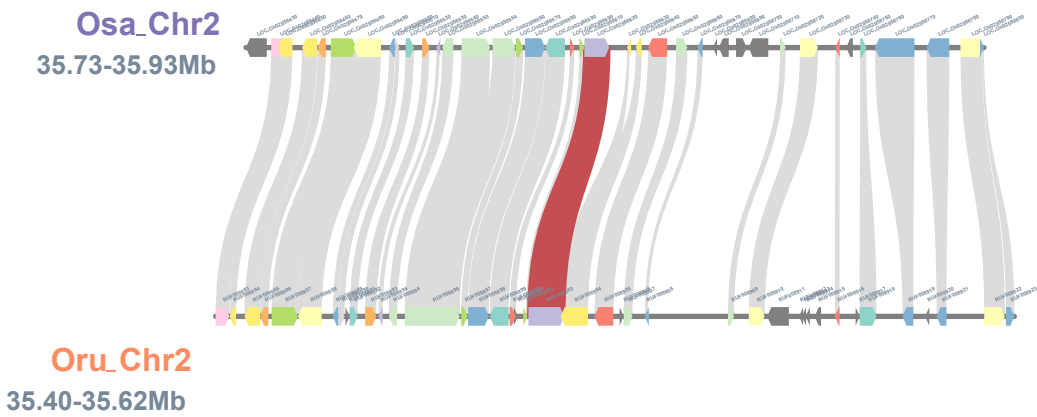

LOC\_Os03g02430 RUF009037

Osa\_Chr3  
0.74-0.98Mb

Oru\_Chr3  
0.74-0.96Mb

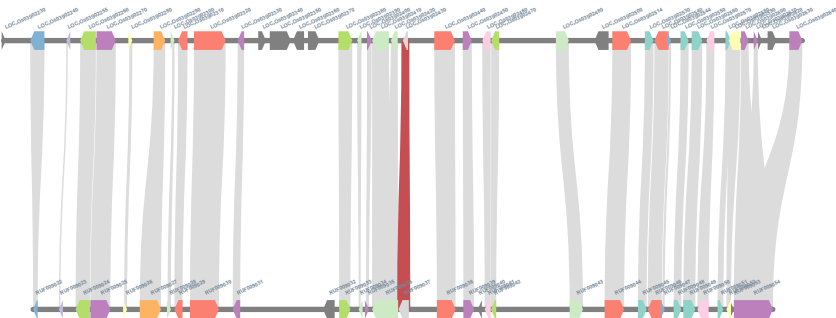

# LOC\_Os03g04390 RUF009148

Osa\_Chr3

1.91-2.15Mb

Oru\_Chr3

1.70-1.96Mb

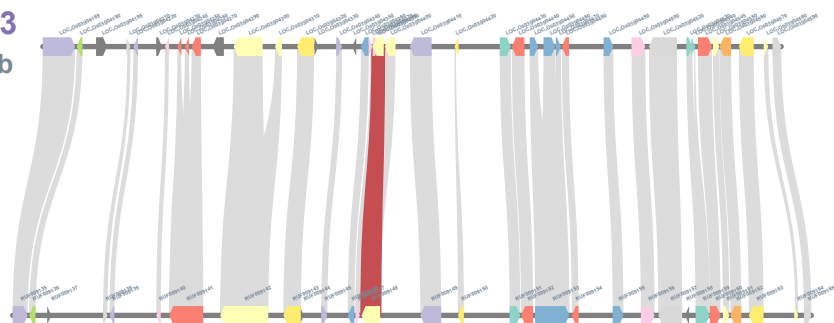

## LOC\_Os03g06370 RUF009308

Osa\_Chr3  
3.07-3.32Mb

Oru\_Chr3  
2.88-3.09Mb

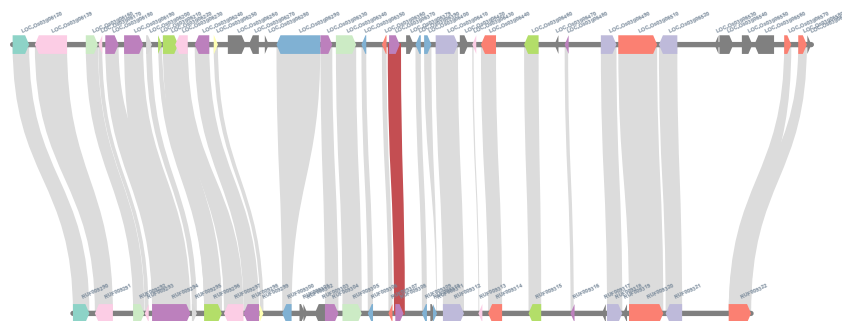

# LOC\_Os03g06910 RUF009348

Osa\_Chr3  
3.41-3.64Mb

Oru\_Chr3  
3.17-3.38Mb

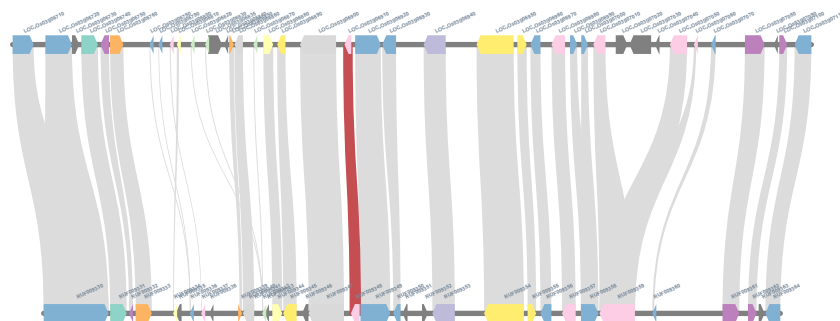



# LOC\_Os03g07220 RUF009375

Osa\_Chr3  
3.57-3.77Mb

Oru\_Chr3  
3.32-3.51Mb

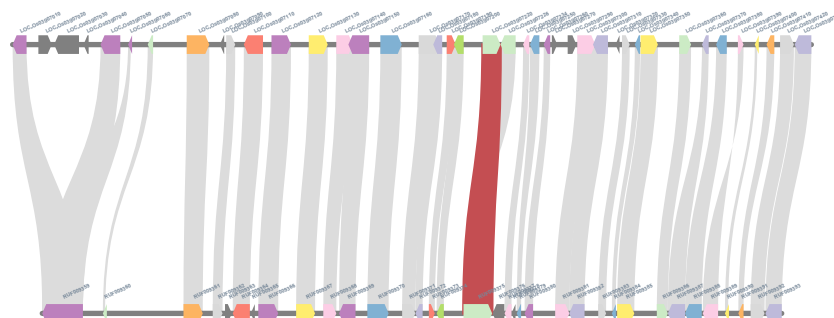

# LOC\_Os03g07234 RUF009377

Osa\_Chr3  
3.58-3.79Mb

Oru\_Chr3  
3.32-3.53Mb

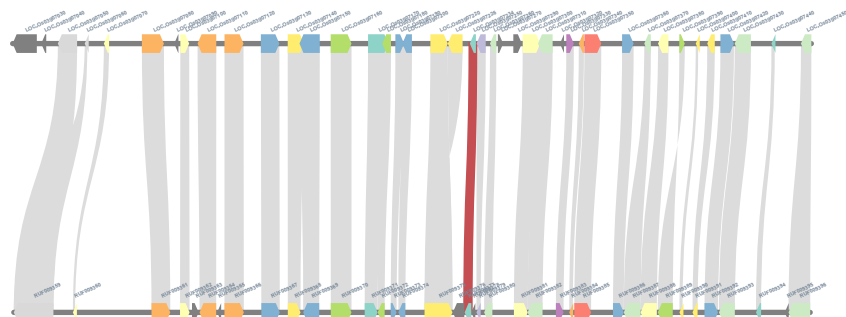

# LOC\_Os03g07330 RUF009383

Osa\_Chr3  
3.63-3.85Mb

Oru\_Chr3  
3.37-3.58Mb

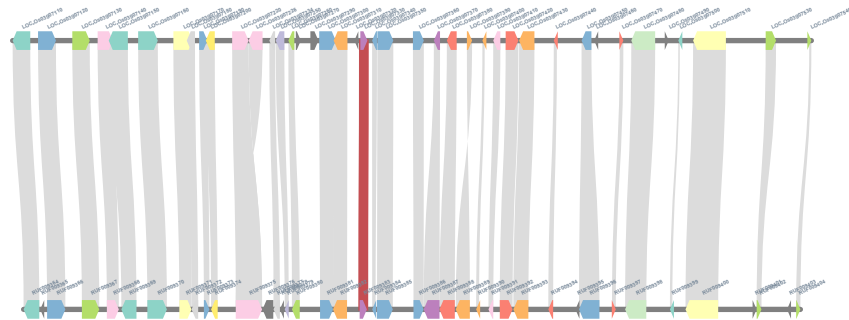

# LOC\_Os03g08680 RUF009498

Osa\_Chr3  
4.36-4.60Mb

Oru\_Chr3  
4.02-4.25Mb

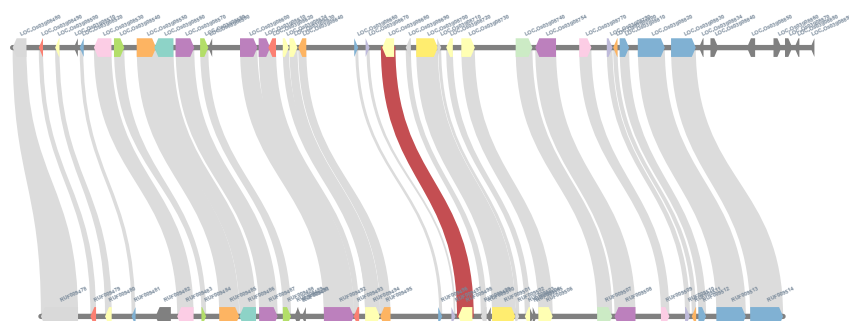

LOC\_Os03g10420 RUF009618

Osa\_Chr3  
5.21-5.44Mb

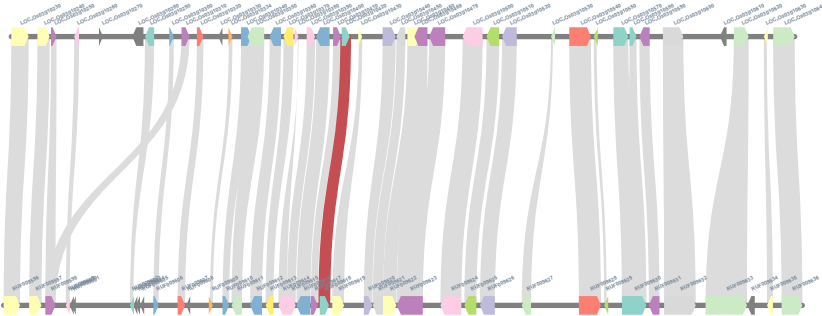

Oru\_Chr3  
4.92-5.16Mb

LOC\_Os03g11020 RUF009671

Osa\_Chr3  
5.54-5.79Mb

Oru\_Chr3  
5.26-5.51Mb

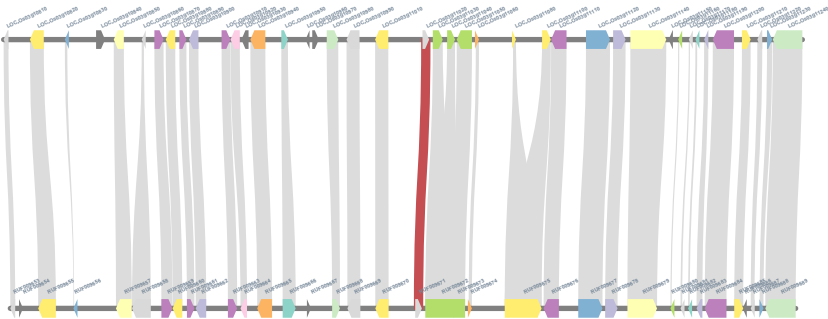

# LOC\_Os03g11310 RUF009696

Osa\_Chr3  
5.71-5.96Mb

Oru\_Chr3  
5.43-5.69Mb

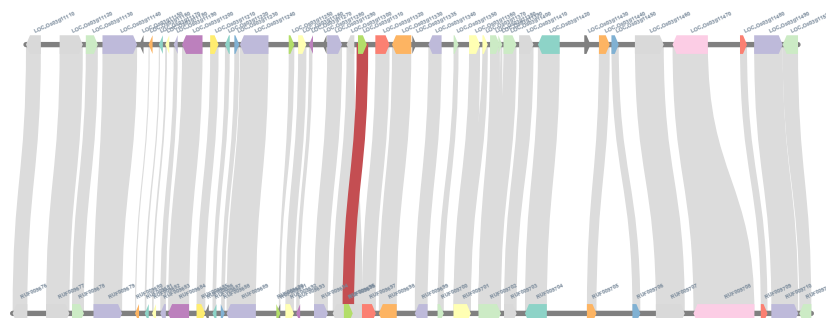

## LOC\_Os03g11670 RUF009725

Osa\_Chr3  
5.91-6.23Mb

Oru\_Chr3  
5.64-5.94Mb

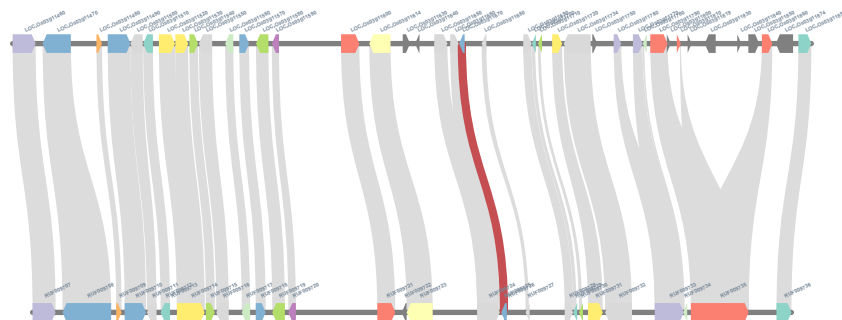



## LOC\_Os03g11690 RUF009728

**Osa\_Chr3**  
5.94-6.25Mb

**Oru\_Chr3**  
5.67-5.96Mb

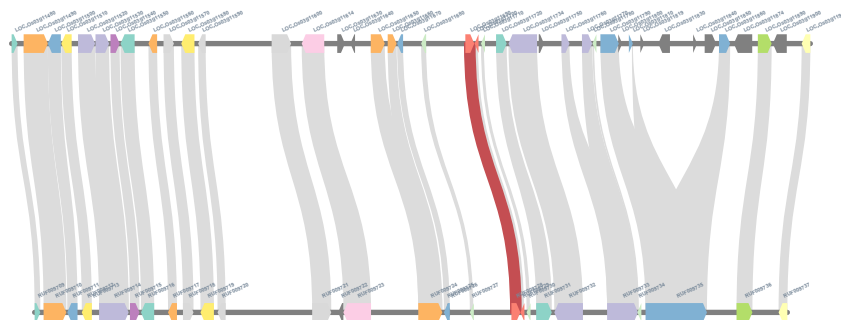

## LOC\_Os03g11700 RUF009729

Osa\_Chr3  
5.95-6.25Mb

Oru\_Chr3  
5.67-5.96Mb

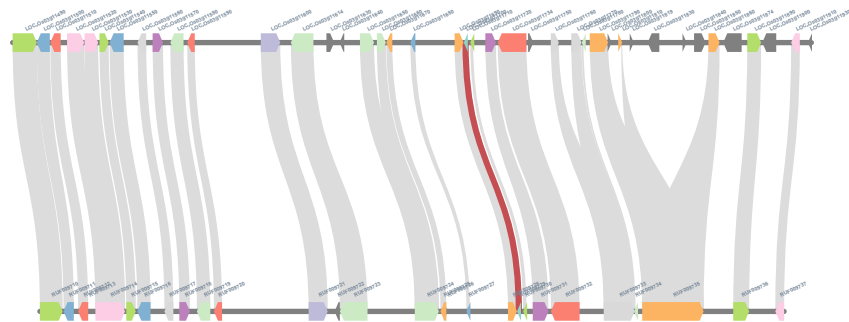

# LOC\_Os03g12430 RUF009787

Osa\_Chr3  
6.42-6.72Mb

Oru\_Chr3  
6.16-6.44Mb

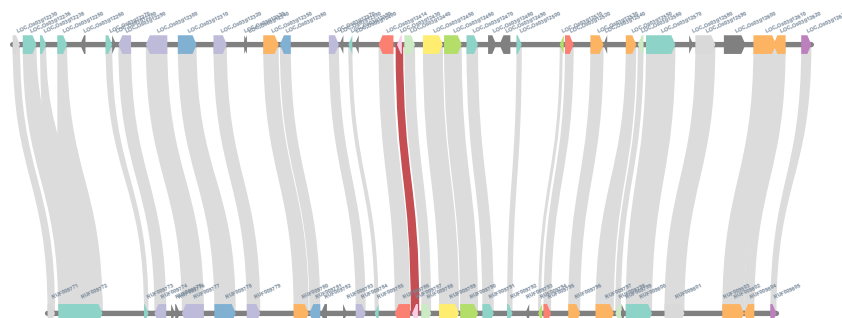

# LOC\_Os03g13230 RUF009850

Osa\_Chr3  
7.03-7.29Mb

Oru\_Chr3  
6.98-6.74Mb

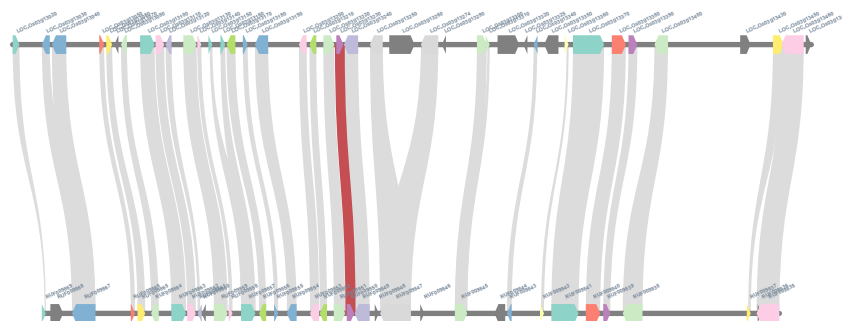

**LOC\_Os03g13830 RUF009895**

## Osa\_Chr3

7.36-7.61Mb

Oru\_Chr3

7.05-7.27Mb

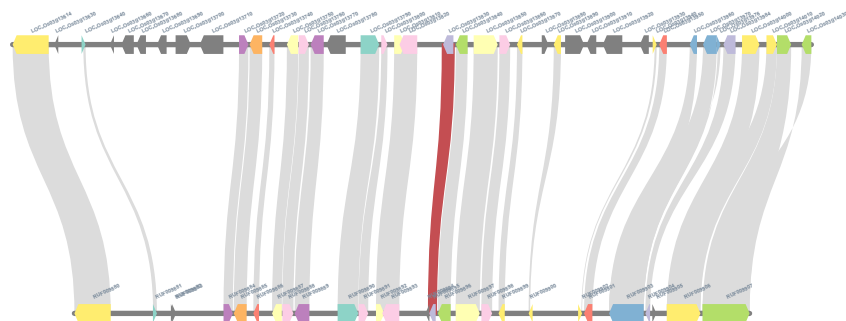

**LOC\_Os03g17634 RUF010179**

## Osa\_Chr3

9.70-9.95Mb

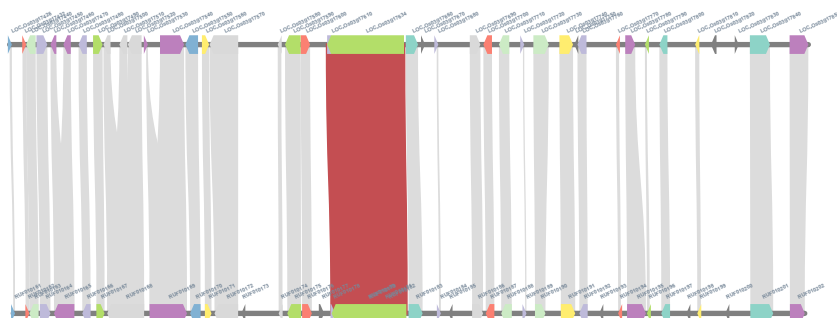

Oru\_Chr3

9.16-9.42Mb

## LOC\_Os03g19650 RUF010360

**Osa\_Chr3**  
10.94-11.18Mb

**Oru\_Chr3**  
10.39-10.66Mb

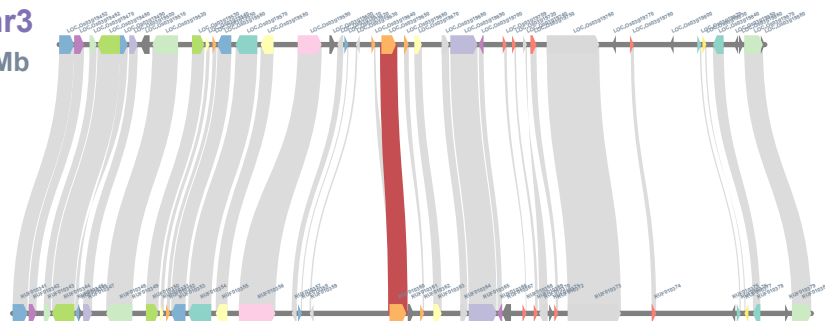

## LOC\_Os03g19980 RUF010391

**Osa\_Chr3**  
11.10-11.42Mb

**Oru\_Chr3**  
10.58-10.91Mb

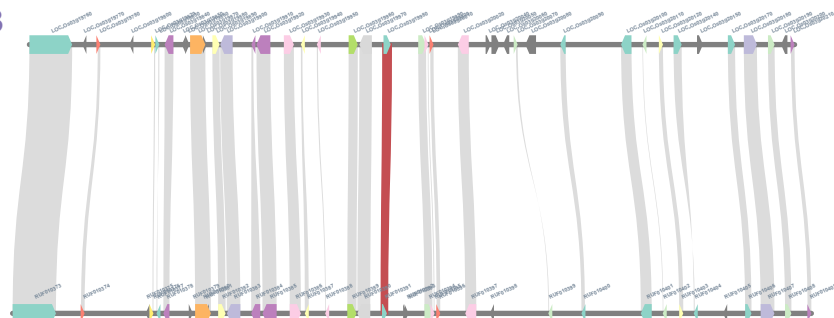



LOC\_Os03g20190 RUF010408

Osa\_Chr3  
11.24-11.54Mb

Oru\_Chr3  
10.72-11.04Mb

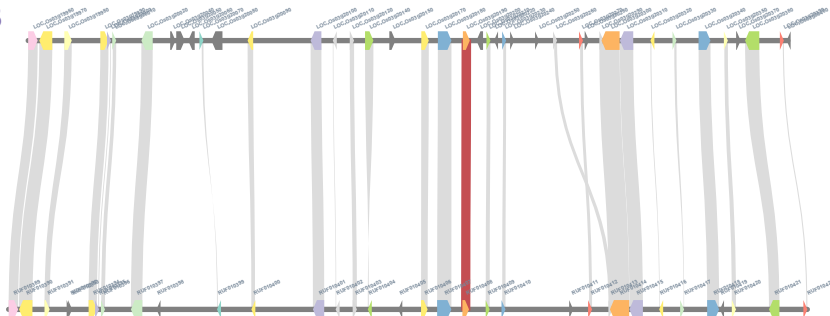

## LOC\_Os03g21780 RUF010545

Osa\_Chr3  
12.33-12.61Mb

Oru\_Chr3  
11.80-12.05Mb

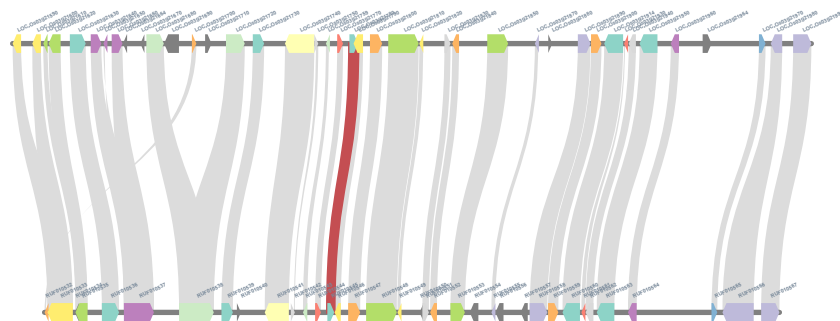

# LOC\_Os03g24880 RUF010720

Osa\_Chr3  
14.03-14.33Mb

Oru\_Chr3  
13.33-13.62Mb

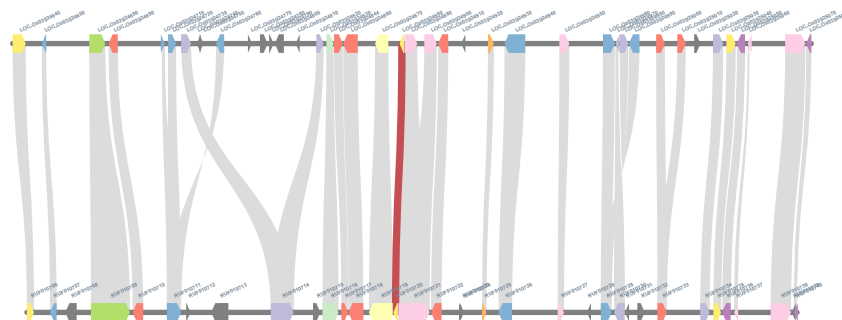

# LOC\_Os03g25380 RUF010773

Osa\_Chr3  
14.41-14.60Mb

Oru\_Chr3  
13.69-13.93Mb

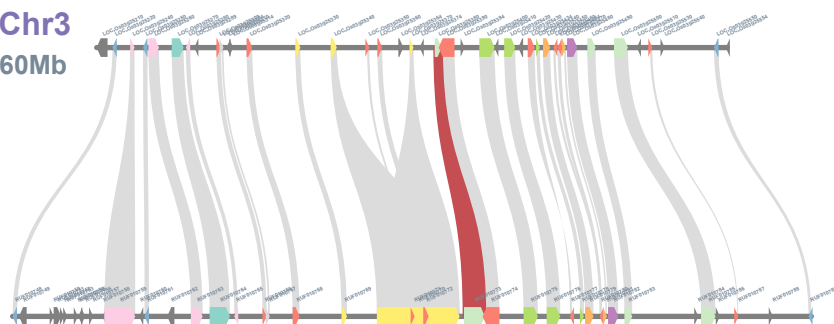

# LOC\_Os03g27880 RUF010950

Osa\_Chr3  
15.86-16.14Mb

Oru\_Chr3  
15.30-15.57Mb

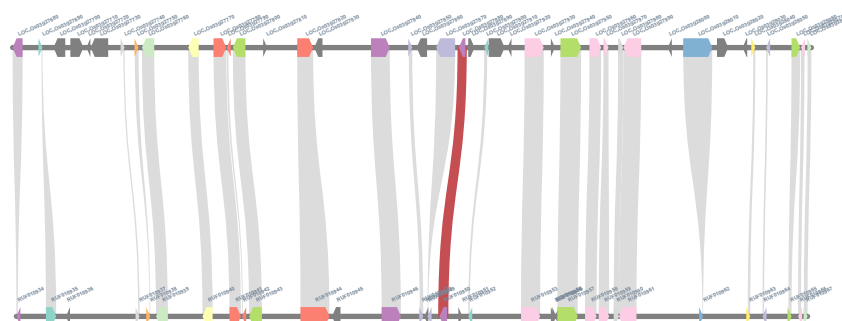

# LOC\_Os03g32090 RUF011169

**Osa\_Chr3**  
18.24-18.51Mb

**Oru\_Chr3**  
17.71-18.03Mb

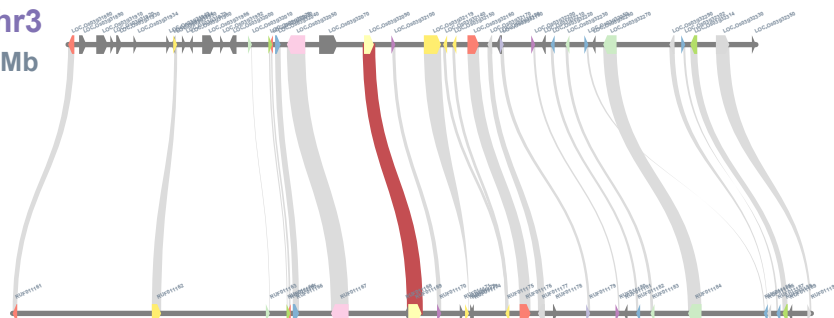

**LOC\_Os03g32620 RUF011199**

## Osa\_Chr3

**18.53-18.80Mb**

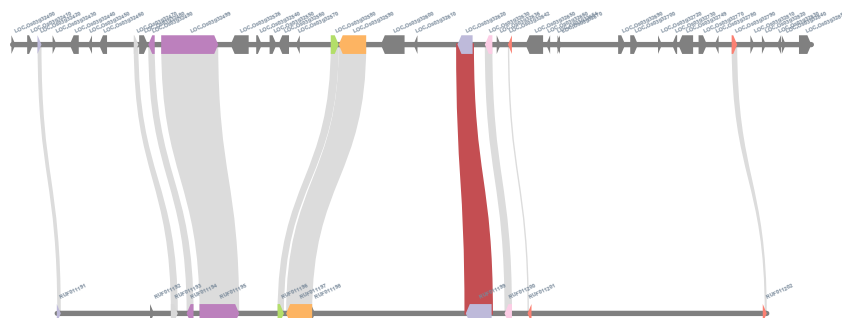

Oru\_Chr3

18.05-18.28Mb

## LOC\_Os03g37260 RUF011308

**Osa\_Chr3**  
20.52-20.83Mb

**Oru\_Chr3**  
20.12-20.42Mb

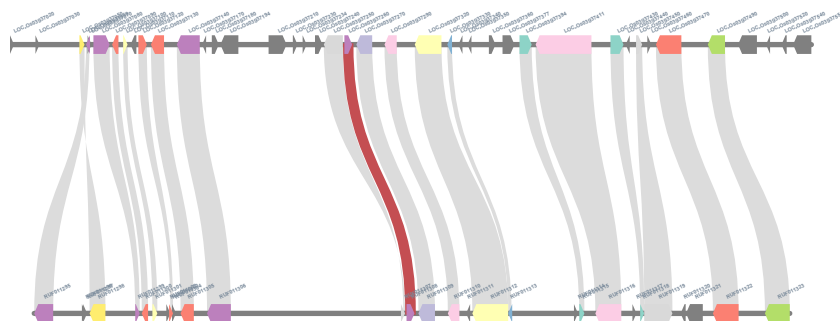



LOC\_Os03g38580 RUF011373

Osa\_Chr3  
21.30-21.54Mb

Oru\_Chr3  
20.96-21.18Mb

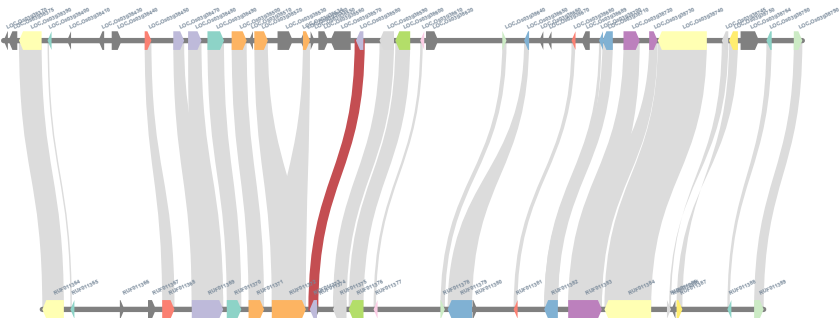

## LOC\_Os03g40020 RUF011443

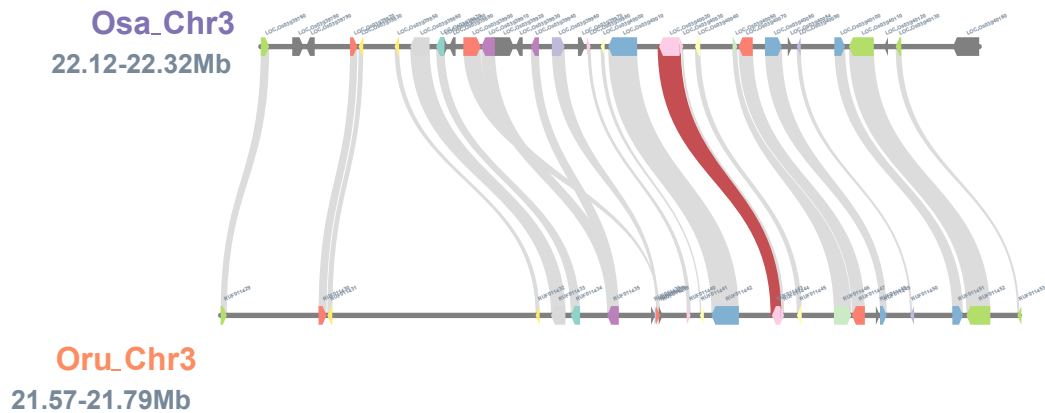

LOC\_Os03g40690 RUF011502

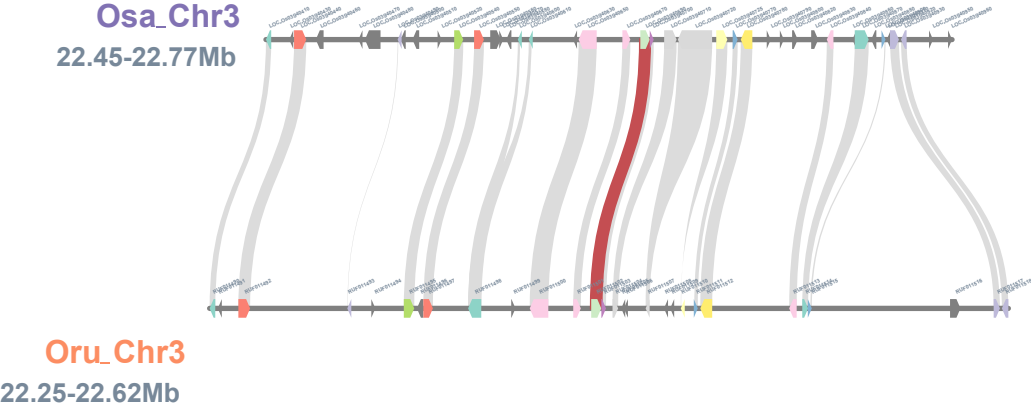

# LOC\_Os03g42650 RUF011588

Osa\_Chr3  
23.59-23.90Mb

Oru\_Chr3  
23.40-23.71Mb

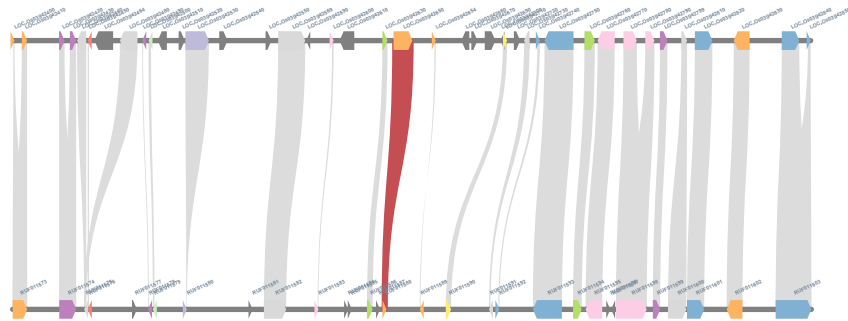

LOC\_Os03g43470 RUF011636

Osa\_Chr3  
24.11-24.44Mb

Oru\_Chr3  
23.88-24.19Mb

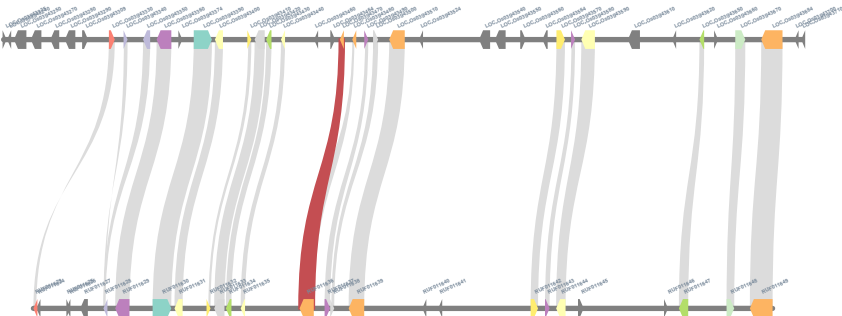

**LOC\_Os03g44210 RUF011690**

### Osa\_Chr3

**24.69-25.00Mb**

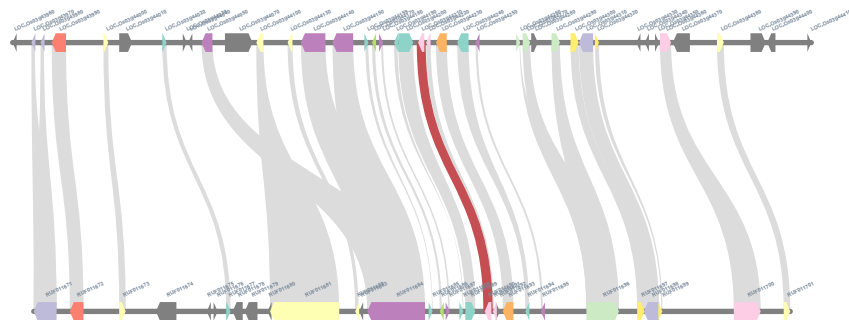

## Oru\_Chr3

24.44-24.74Mb

## LOC\_Os03g49464 RUF012073

Osa\_Chr3  
28.04-28.28Mb

Oru\_Chr3  
27.79-27.99Mb

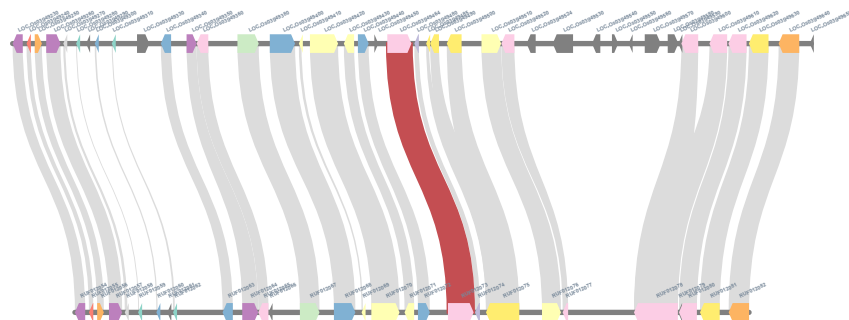

**LOC\_Os03g50500 RUF012148**

**Osa\_Chr3**  
**28.67-28.96Mb**

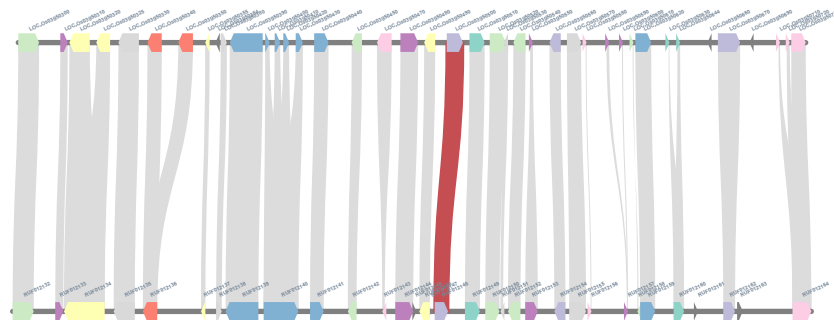

Oru\_Chr3  
28.37-28.67Mb



**LOC Os03g51840 RUF012261**

## Osa\_Chr3

29.54-29.84Mb

## Oru\_Chr3

## 29.25-29.56Mb

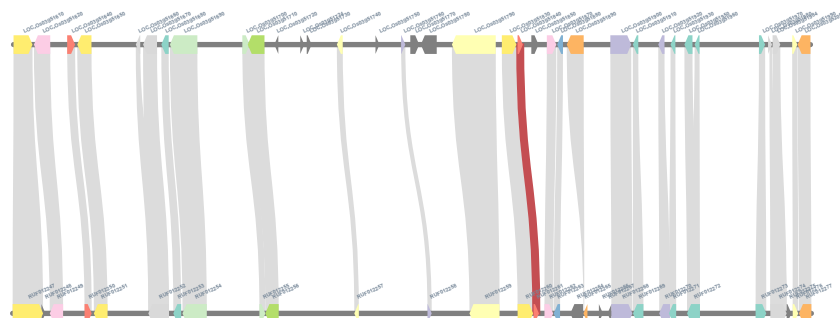

**LOC\_Os03g53170 RUF012300**

**Osa\_Chr3**  
30.03-30.74Mb

**Oru\_Chr3**  
29.58-30.02Mb

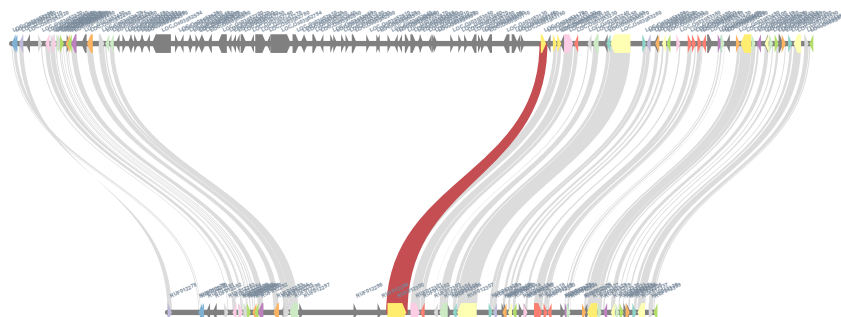

# LOC\_Os03g53490 RUF012326

Osa\_Chr3  
30.55-30.79Mb

Oru\_Chr3  
29.82-30.06Mb

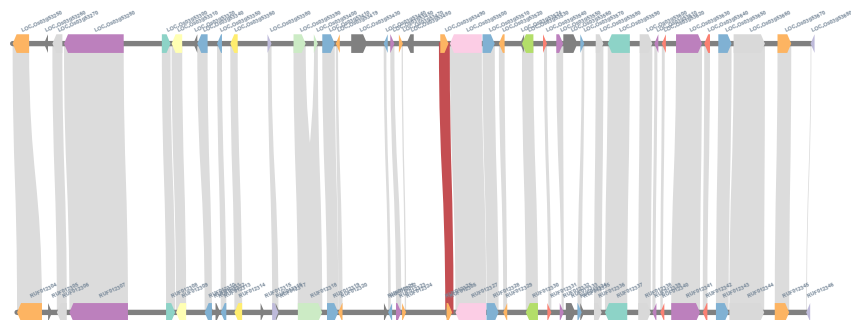

# LOC\_Os03g55340 RUF012437

Osa\_Chr3  
31.36-31.62Mb

Oru\_Chr3  
30.63-30.90Mb

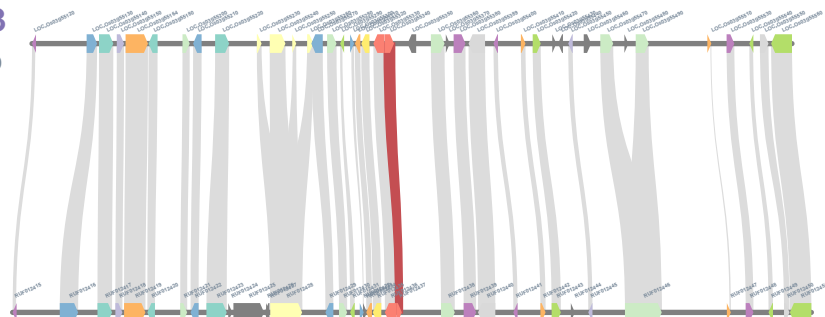

# LOC\_Os03g56400 RUF012522

Osa\_Chr3  
32.02-32.24Mb

Oru\_Chr3  
31.26-31.52Mb

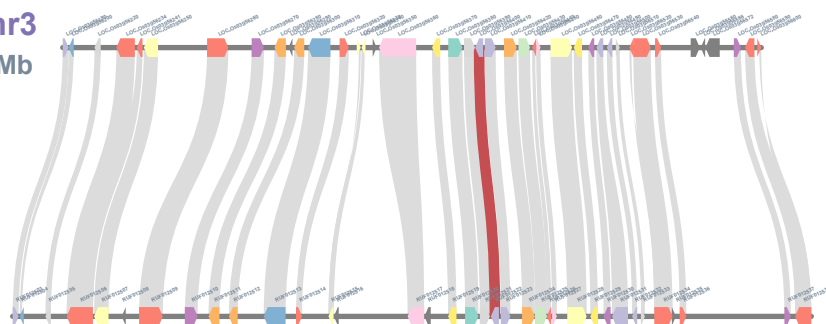

# LOC\_Os03g56850 RUF012556

Osa\_Chr3  
32.31-32.49Mb

Oru\_Chr3  
31.58-31.72Mb

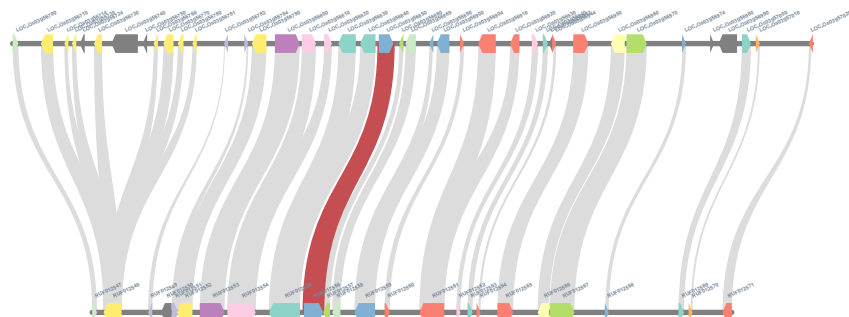

# LOC\_Os03g56960 RUF012566

Osa\_Chr3  
32.36-32.59Mb

Oru\_Chr3  
31.59-31.82Mb

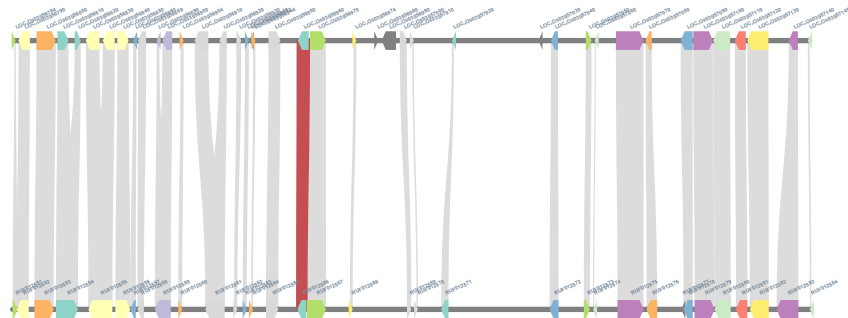

# LOC\_Os03g58100 RUF012654

Osa\_Chr3  
32.98-33.23Mb

Oru\_Chr3  
32.24-32.50Mb

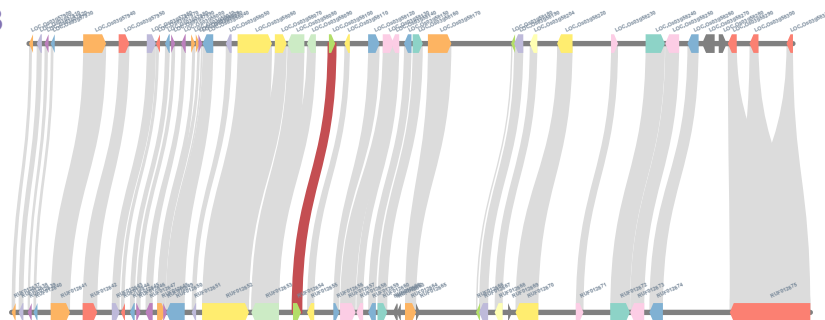



# LOC\_Os03g58120 RUF012656

Osa\_Chr3  
32.99-33.24Mb

Oru\_Chr3  
32.25-32.52Mb

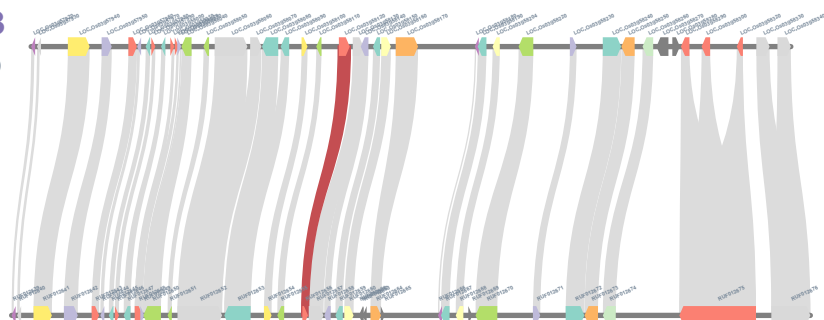

LOC\_Os03g59264 RUF012753

Osa\_Chr3  
33.62-33.85Mb

Oru\_Chr3  
32.90-33.13Mb

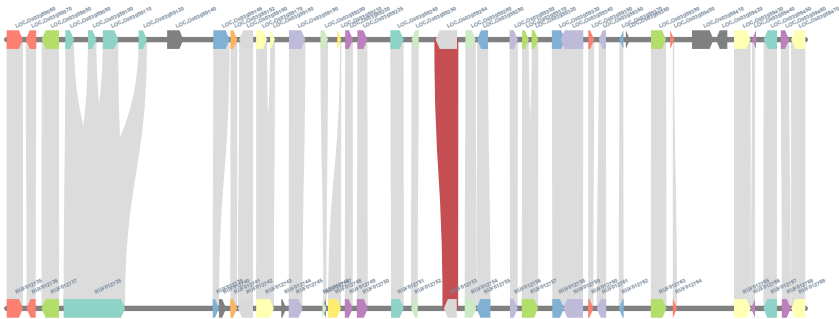

LOC\_Os03g60200 RUF012817

Osa\_Chr3  
34.12-34.37Mb

Oru\_Chr3  
33.38-33.59Mb

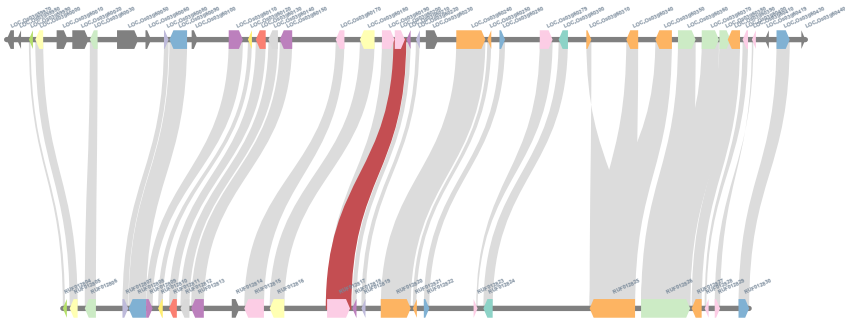

**LOC\_Os03g60690 RUF012851**

### Osa\_Chr3

34.38-34.61Mb

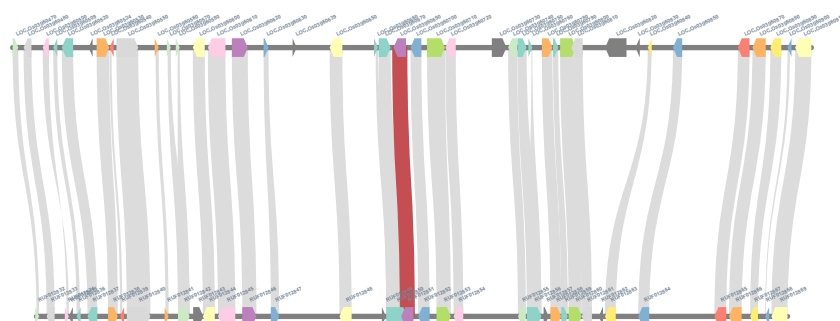

Oru\_Chr3

**33.61-33.83Mb**

## LOC\_Os03g60910 RUF012869

**Osa\_Chr3**  
34.49-34.73Mb

**Oru\_Chr3**  
33.72-33.94Mb

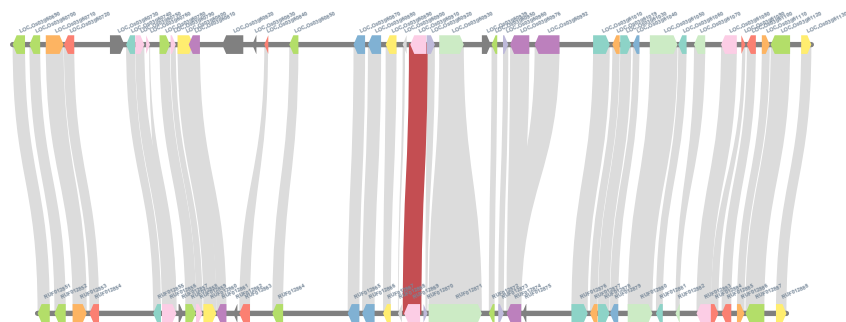

## LOC\_Os03g62690 RUF013013

**Osa\_Chr3**  
35.38-35.59Mb

**Oru\_Chr3**  
34.59-34.80Mb

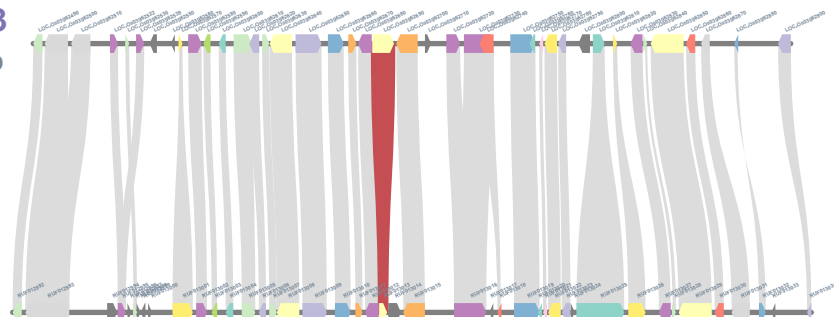

# LOC\_Os03g63260 RUF013053

Osa\_Chr3  
35.63-35.86Mb

Oru\_Chr3  
34.84-35.03Mb

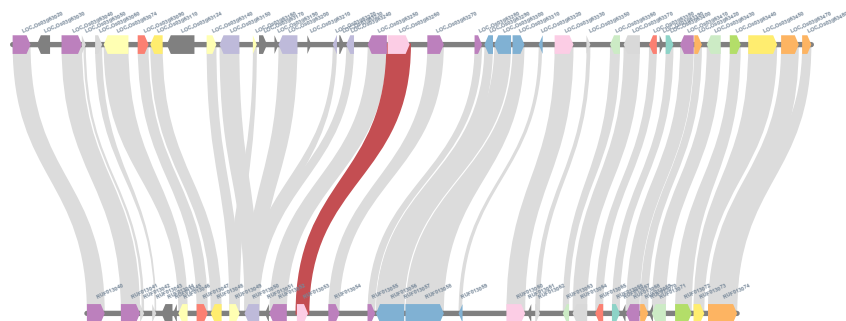

# LOC\_Os03g63510 RUF013078

Osa\_Chr3

35.77-35.97Mb

Oru\_Chr3

34.93-35.13Mb

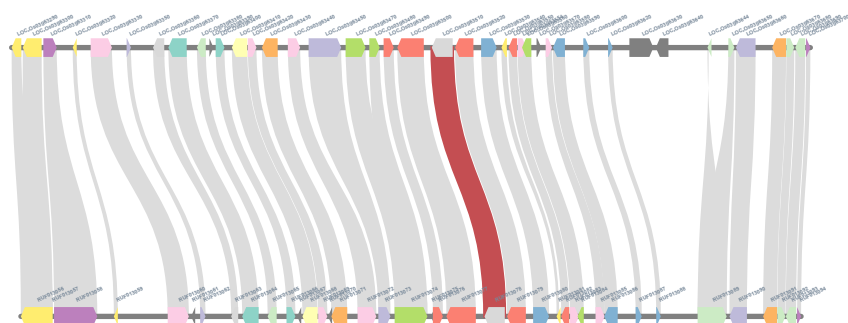



# LOC\_Os03g63560 RUF013084

Osa\_Chr3  
35.81-36.00Mb

Oru\_Chr3  
34.98-35.15Mb

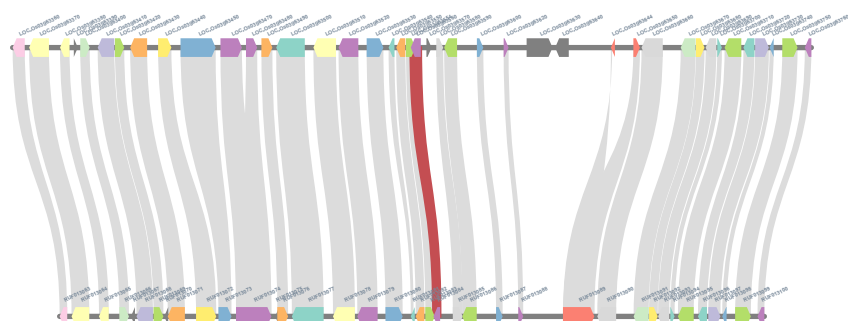

## LOC\_Os03g63910 RUF013110

**Osa\_Chr3**  
35.98-36.25Mb

**Oru\_Chr3**  
35.13-35.38Mb

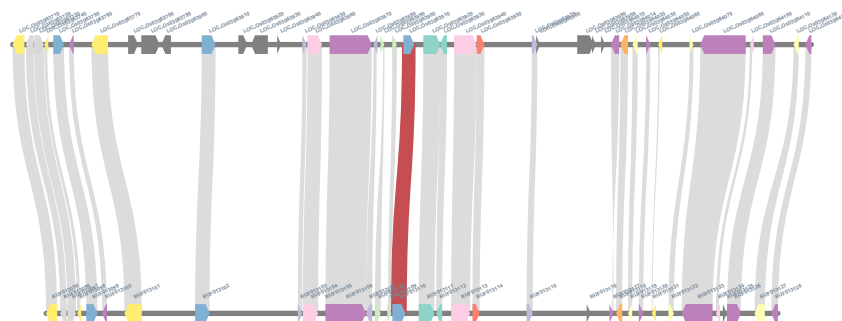

**LOC\_Os03g64370 RUF013147**

Osa\_Chr3  
36.25-36.41Mb

Oru\_Chr3  
35.38-35.56Mb

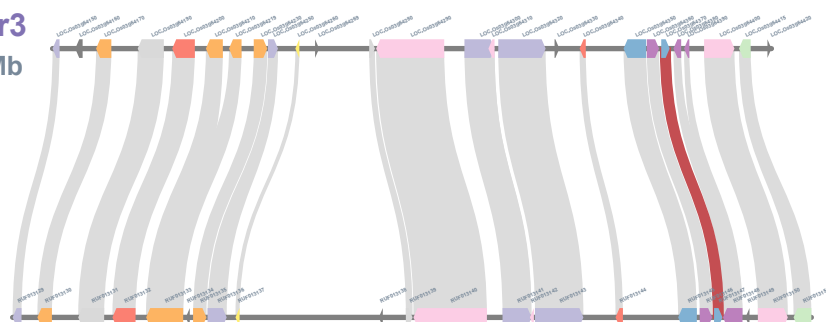

**LOC\_Os04g02850 RUF013409**

**Osa\_Chr4**  
0.98-1.27Mb

**Oru\_Chr4**  
3.16-3.64Mb

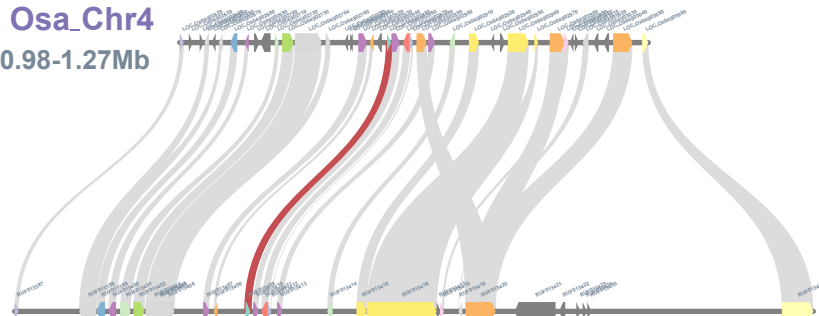

**LOC\_Os04g25410 RUF014104**

Osa\_Chr4  
14.55-14.85Mb

Oru\_Chr4  
13.94-13.63Mb

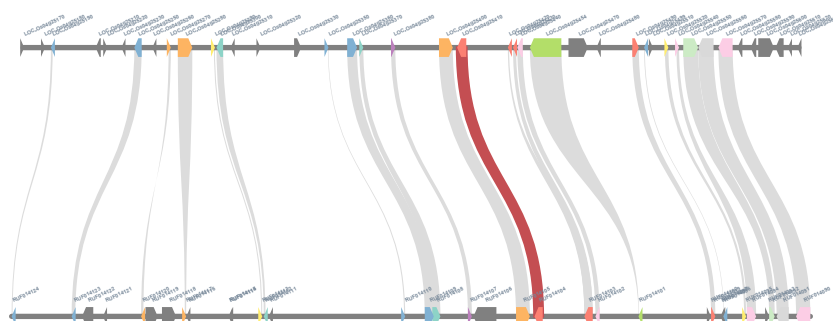

# LOC\_Os04g28234 RUF014227

Osa\_Chr4  
16.53-16.86Mb

Oru\_Chr4  
15.03-15.46Mb

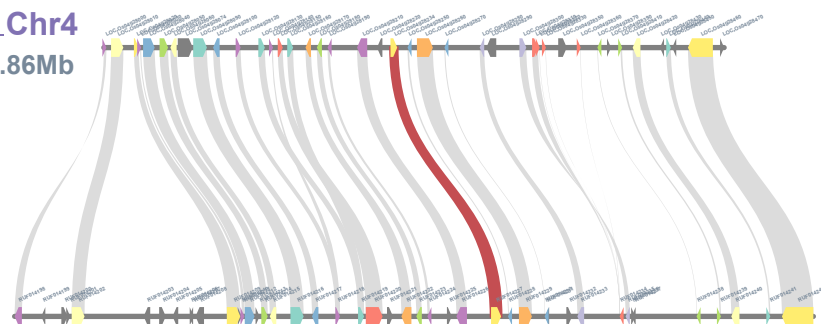

LOC\_Os04g28300 RUF014235

Osa\_Chr4  
16.57-16.90Mb

Oru\_Chr4  
15.17-15.52Mb

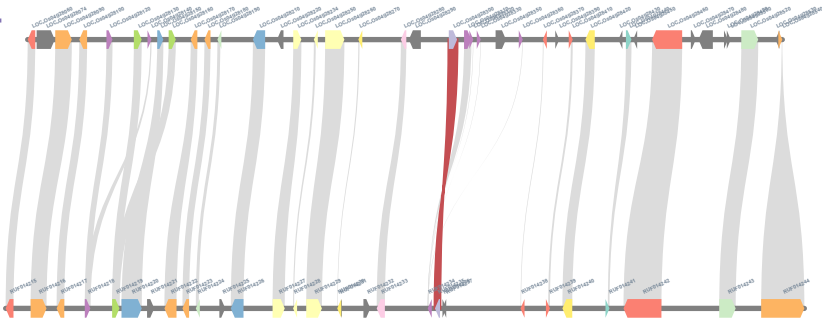

LOC\_Os04g32870 RUF014521

Osa\_Chr4  
19.69-20.04Mb

Oru\_Chr4  
18.48-18.82Mb

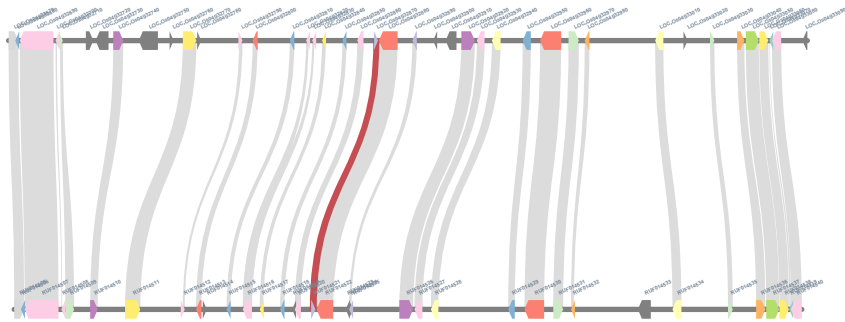



# LOC\_Os04g33840 RUF014614

Osa\_Chr4  
20.36-20.62Mb

Oru\_Chr4  
19.20-19.45Mb

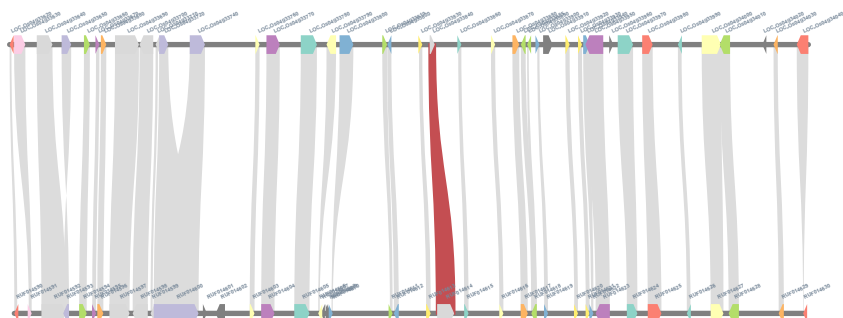

# LOC\_Os04g35305 RUF014711

Osa\_Chr4  
21.33-21.63Mb

Oru\_Chr4  
20.14-20.40Mb

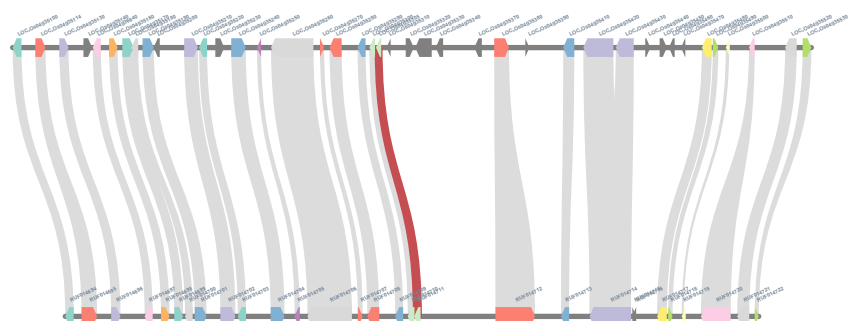

## LOC\_Os04g35610 RUF014732

Osa\_Chr4  
21.55-21.83Mb

Oru\_Chr4  
20.34-20.60Mb

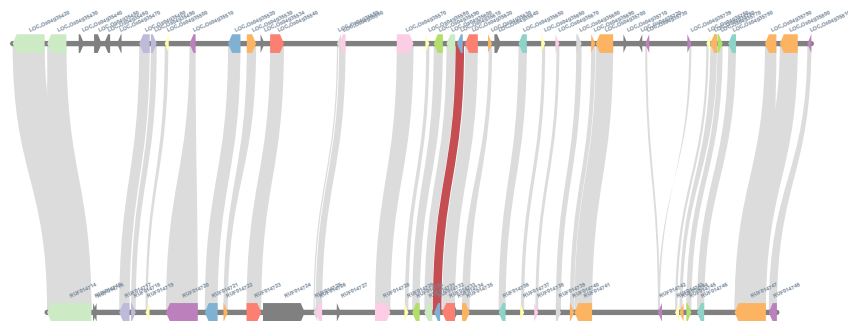

# LOC\_Os04g35650 RUF014736

Osa\_Chr4  
21.58-21.86Mb

Oru\_Chr4  
20.37-20.63Mb

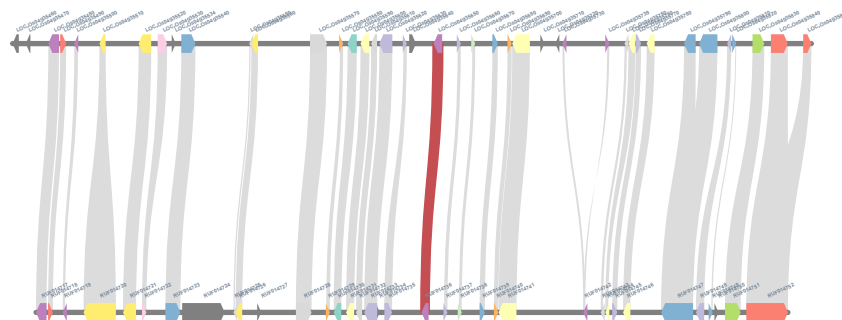

# LOC\_Os04g36840 RUF014810

Osa\_Chr4  
22.09-22.35Mb

Oru\_Chr4  
20.84-21.16Mb

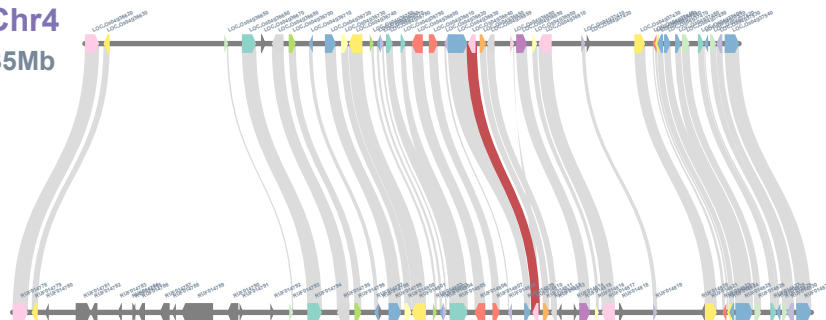

LOC\_Os04g37720 RUF014847

Osa\_Chr4  
22.33-22.57Mb

Oru\_Chr4  
21.15-21.38Mb

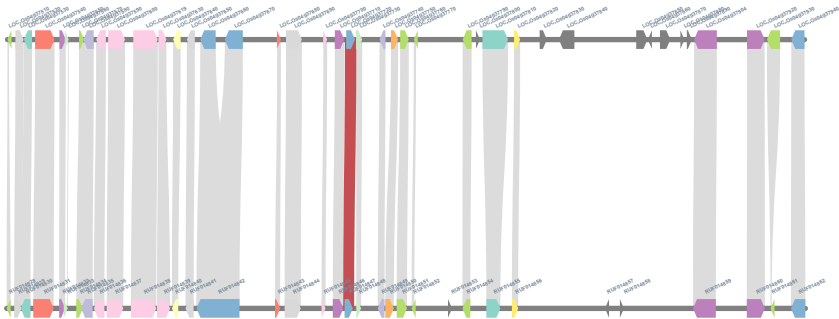

## LOC\_Os04g38930 RUF014939

**Osa\_Chr4**  
23.03-23.28Mb

**Oru\_Chr4**  
21.75-22.00Mb

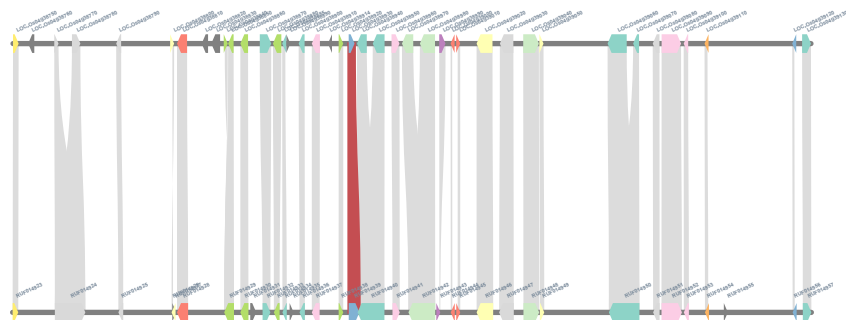

**LOC\_Os04g38980 RUF014942**

## Osa\_Chr4

**23.08-23.30Mb**

## Oru\_Chr4

21.80-22.02Mb



**LOC\_Os04g39000 RUF014944**

Osa\_Chr4  
23.09-23.31Mb

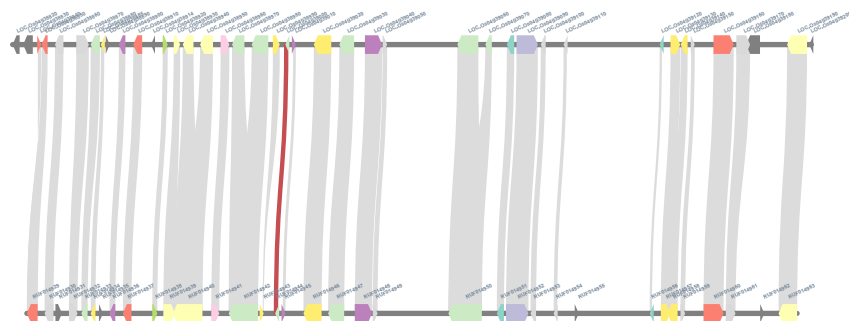

Oru\_Chr4  
21.82-22.04Mb

# LOC\_Os04g39410 RUF014979

Osa\_Chr4  
23.32-23.63Mb

Oru\_Chr4  
22.04-22.35Mb

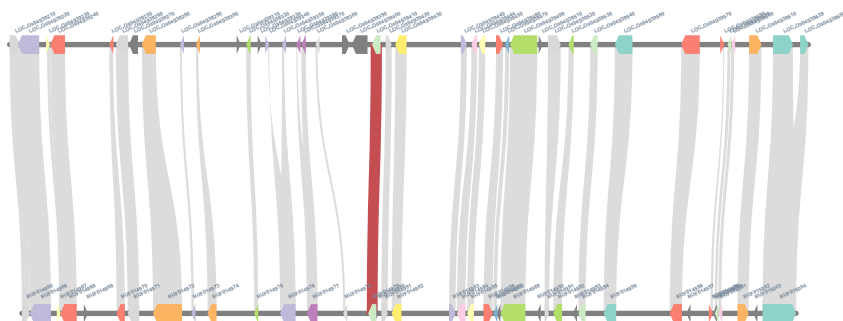

## LOC\_Os04g40010 RUF015020

**Osa\_Chr4**  
23.69-23.93Mb

**Oru\_Chr4**  
22.40-22.60Mb

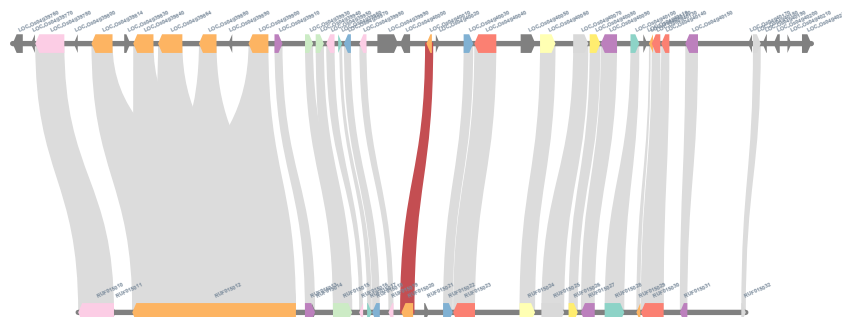

## LOC\_Os04g43430 RUF015250

**Osa\_Chr4**  
25.57-25.84Mb

**Oru\_Chr4**  
24.02-24.30Mb

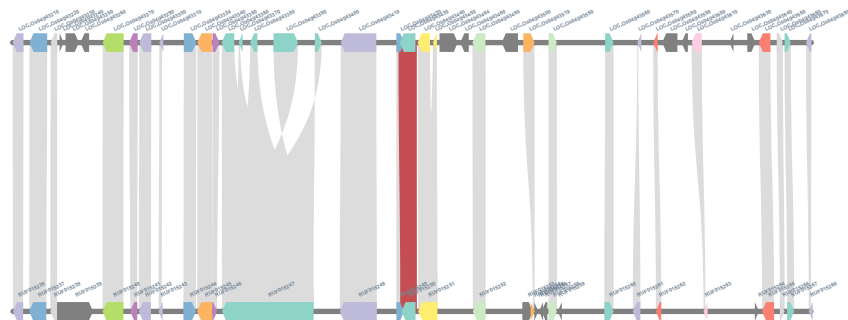

**LOC\_Os04g44030 RUF015291**

## Osa\_Chr4

**25.96-26.20Mb**

Oru\_Chr4

**24.42-24.65Mb**

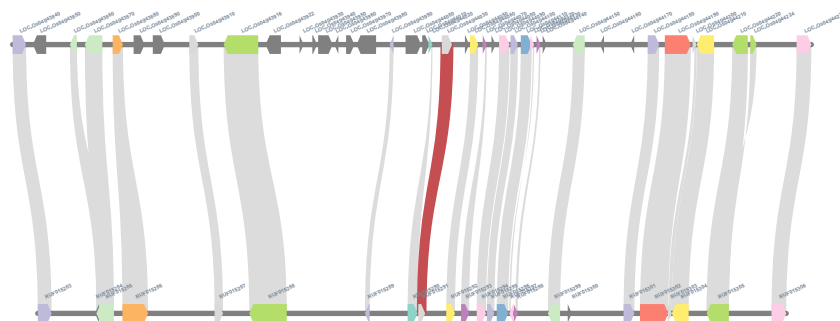

# LOC\_Os04g46010 RUF015463

Osa\_Chr4  
27.11-27.40Mb

Oru\_Chr4  
25.54-25.82Mb

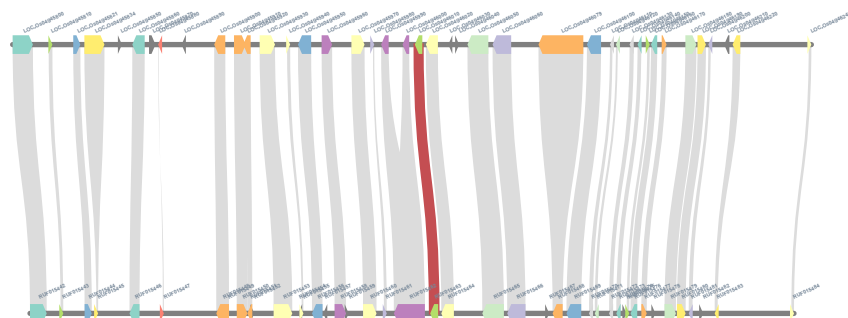

**LOC\_Os04g49350 RUF015724**

## Osa\_Chr4

**29.29-29.57Mb**

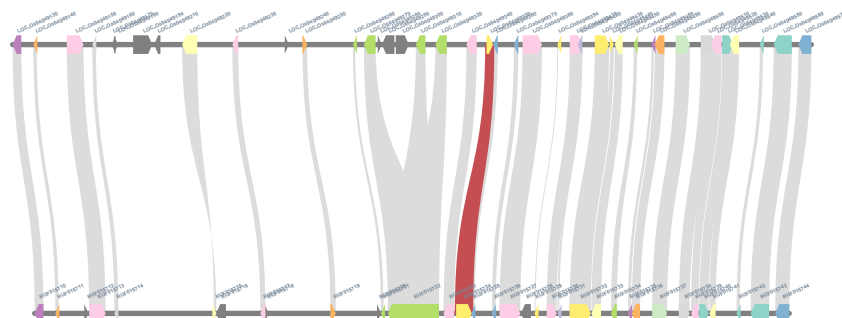

Oru\_Chr4

**27.73-28.00Mb**

## LOC\_Os04g49520 RUF015739

**Osa\_Chr4**  
29.42-29.65Mb

**Oru\_Chr4**  
27.86-28.09Mb

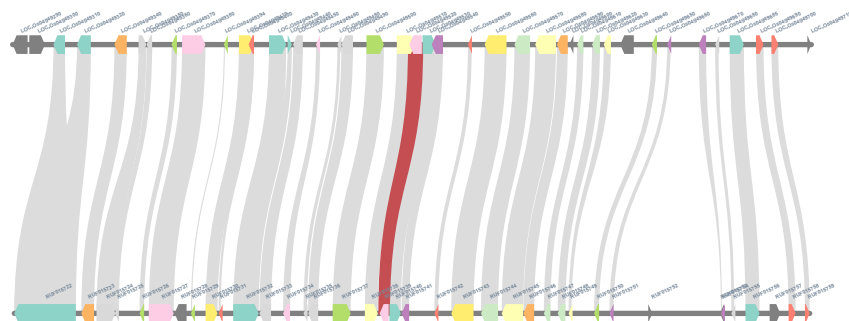



# LOC\_Os04g51350 RUF015870

Osa\_Chr4  
30.29-30.53Mb

Oru\_Chr4  
28.70-28.90Mb

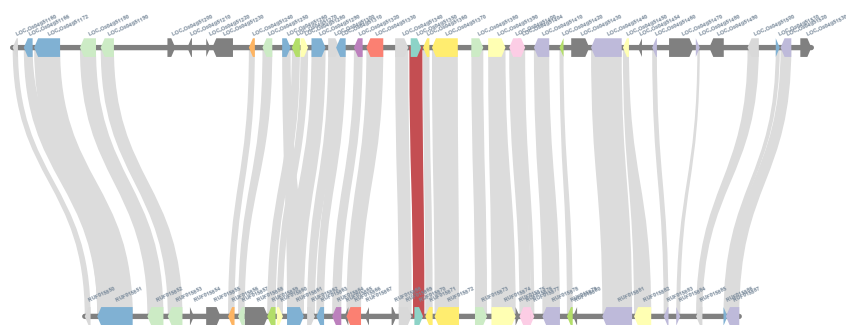

## LOC\_Os04g52290 RUF015953

**Osa\_Chr4**  
30.92-31.23Mb

**Oru\_Chr4**  
29.29-29.65Mb

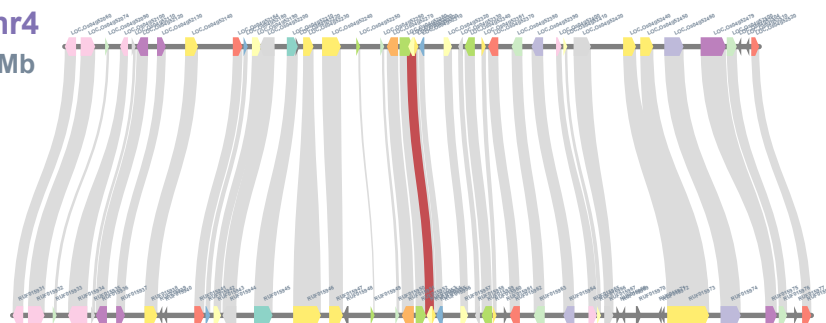

LOC\_Os04g52725 RUF015996

Osa\_Chr4  
31.24-31.53Mb

Oru\_Chr4  
29.66-29.96Mb

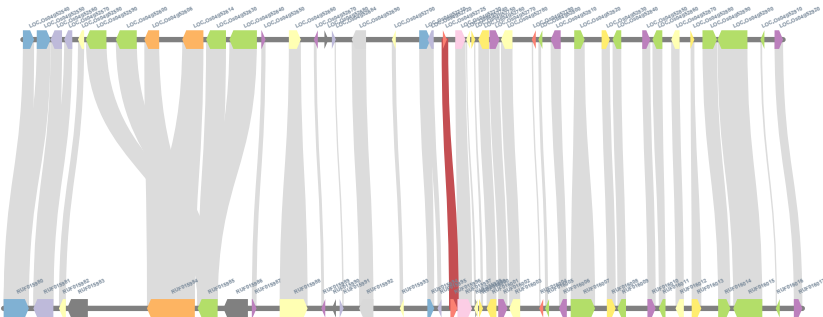

# LOC\_Os04g53630 RUF016085

Osa\_Chr4  
31.82-32.08Mb

Oru\_Chr4  
30.47-30.68Mb

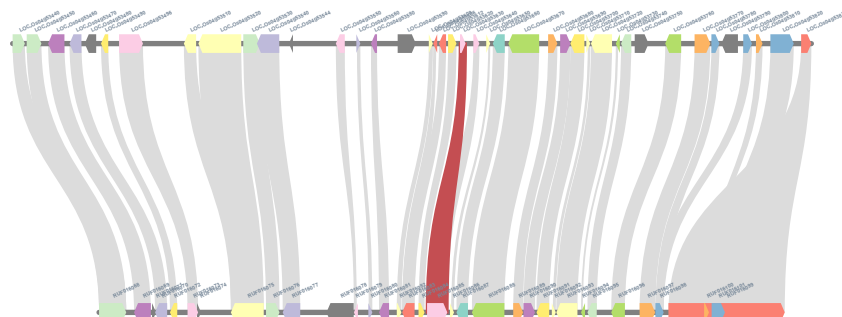

# LOC\_Os04g55090 RUF016173

Osa\_Chr4  
32.63-32.87Mb

Oru\_Chr4  
31.13-31.35Mb

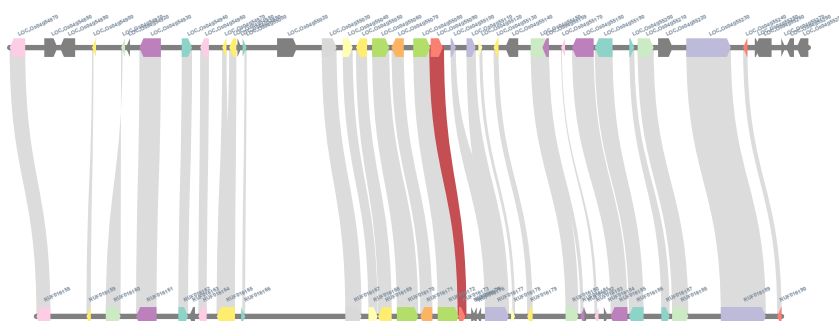

LOC\_Os04g57900 RUF016363

Osa\_Chr4  
34.35-34.61Mb

Oru\_Chr4  
32.45-32.69Mb

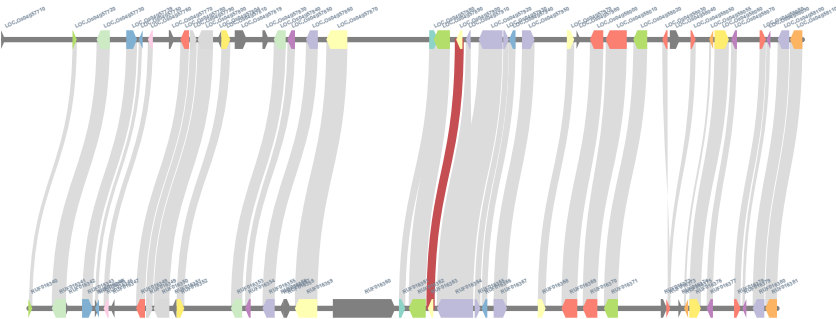

**LOC\_Os04g57940 RUF016366**

## Osa\_Chr4

### 34.40-34.64Mb

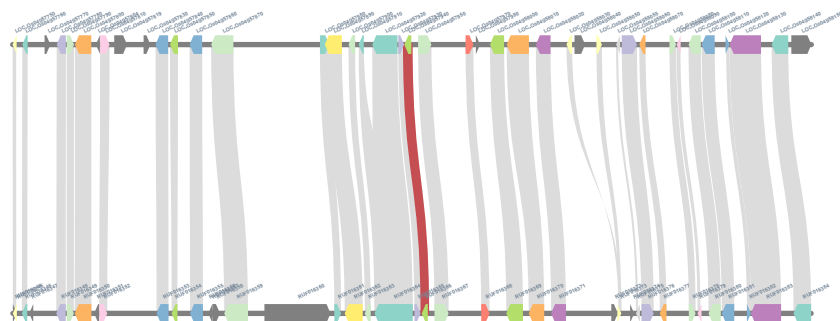

Oru\_Chr4

32.47-32.71Mb

**LOC\_Os04g58780 RUF016441**

## Osa\_Chr4

34.82-35.10Mb

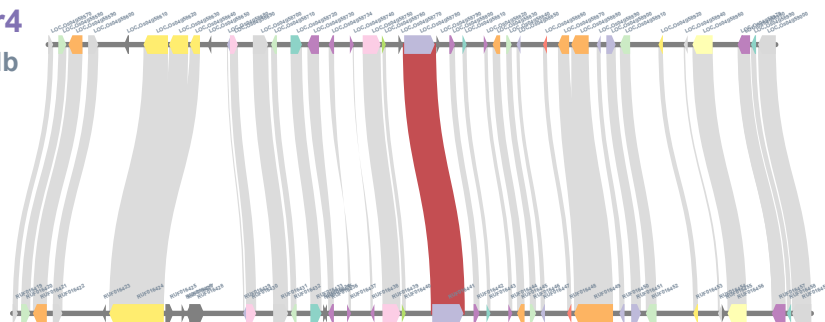

## Oru\_Chr4

**32.91-33.21Mb**



**LOC\_Os04g58980 RUF016457**

## Osa\_Chr4

34.95-35.21Mb

Oru\_Chr4

**33.06-33.28Mb**

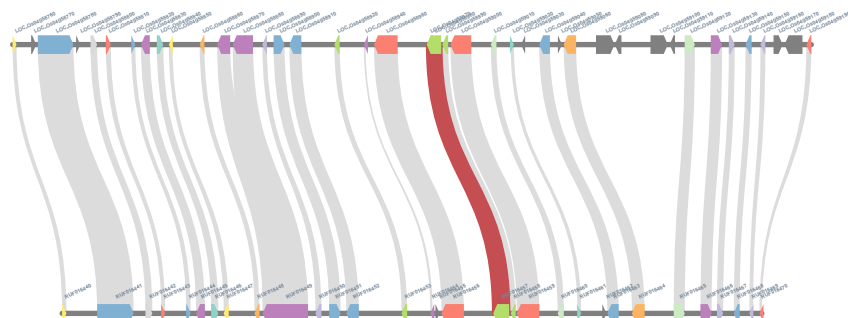

**LOC\_Os05g01635 RUF016552**

**Osa\_Chr5**  
0.26-0.50Mb

**Oru\_Chr5**  
0.27-0.48Mb

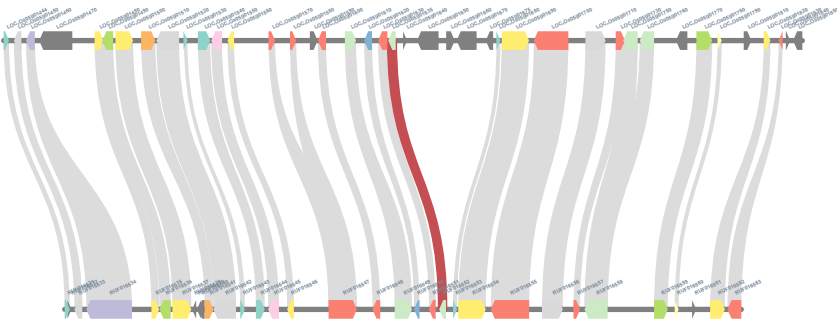

# LOC\_Os05g02210 RUF016595

Osa\_Chr5  
0.57-0.80Mb

Oru\_Chr5  
0.57-0.81Mb

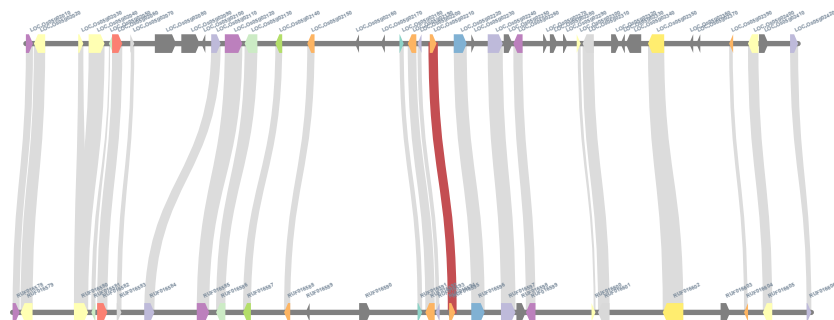

# LOC\_Os05g04160 RUF016732

Osa\_Chr5  
1.77-2.02Mb

Oru\_Chr5  
1.94-2.14Mb

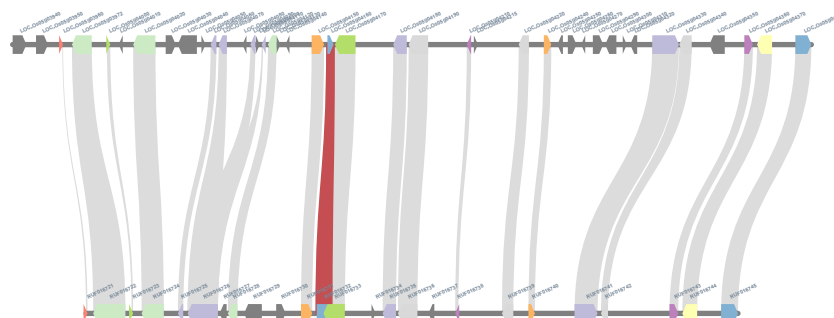

# LOC\_Os05g05490 RUF016840

Osa\_Chr5  
2.61-2.84Mb

Oru\_Chr5  
2.72-2.94Mb

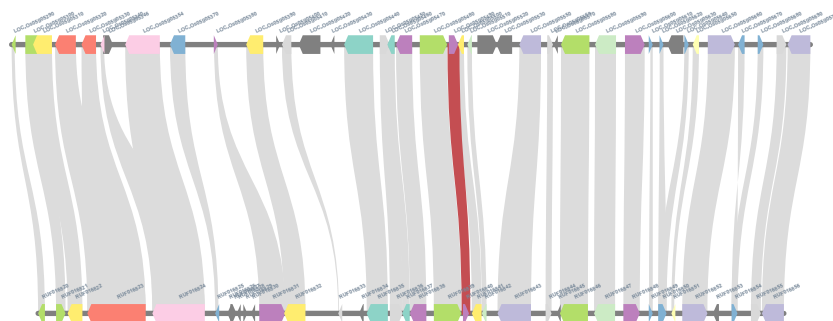

# LOC\_Os05g05490 RUF016840

Osa\_Chr5  
2.97-3.26Mb

Oru\_Chr5  
3.06-3.33Mb

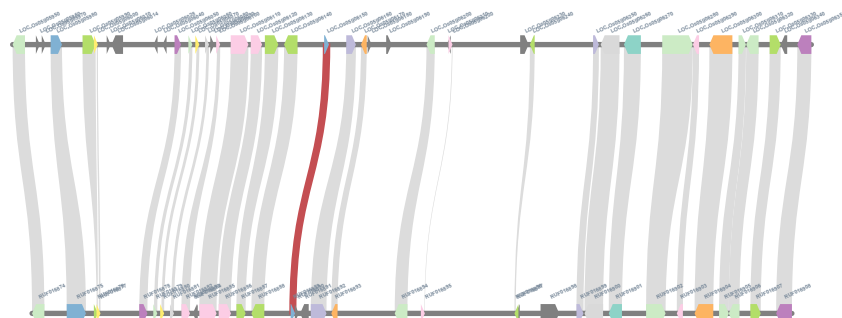

**LOC\_Os05g11700 RUF017220**

## Osa\_Chr5

6.51-6.79Mb

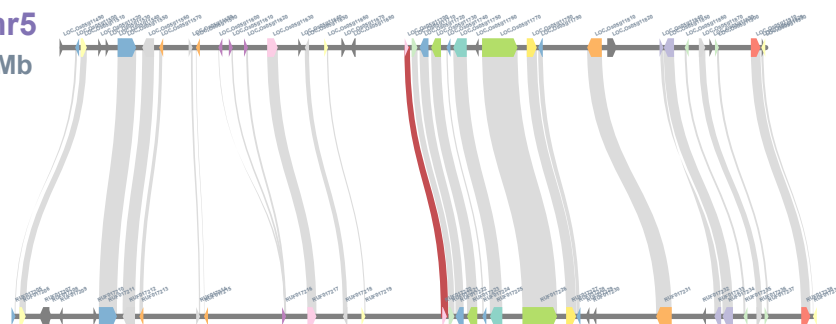

Oru\_Chr5

## 6.36-6.69Mb

## LOC\_Os05g12130 RUF017254

**Osa\_Chr5**  
6.79-7.09Mb

**Oru\_Chr5**  
6.72-7.03Mb

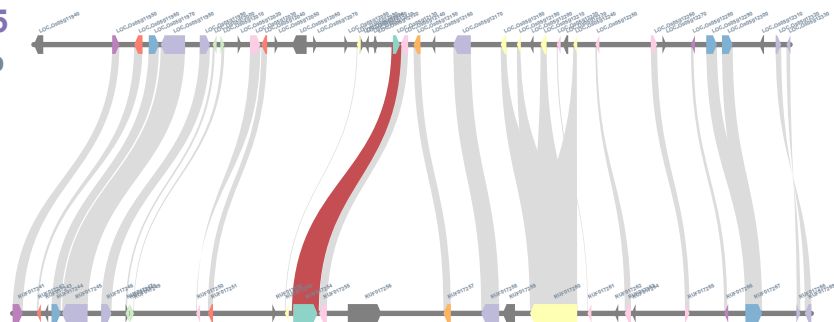



# LOC\_Os05g18950 RUF017564

Osa\_Chr5  
10.88-11.12Mb

Oru\_Chr5  
10.51-10.74Mb

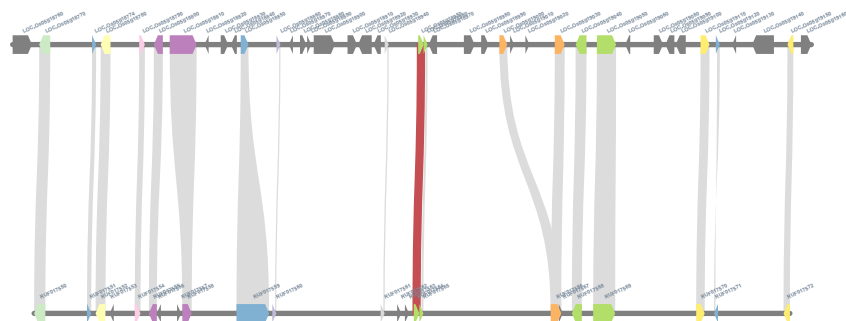

# LOC\_Os05g19380 RUF017580

Osa\_Chr5  
11.12-11.41Mb

Oru\_Chr5  
10.79-11.01Mb

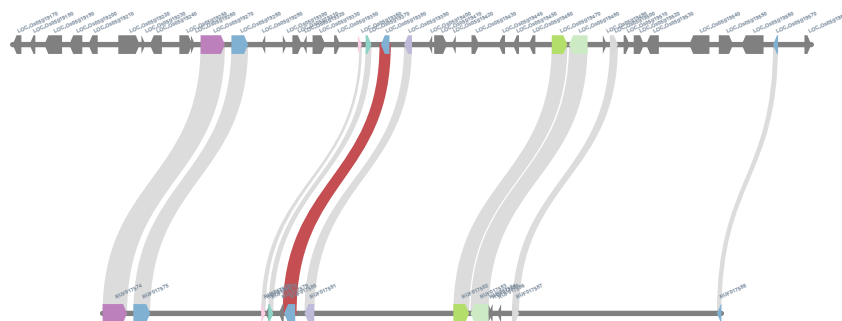

## LOC\_Os05g19390 RUF017581

Osa\_Chr5  
11.13-11.42Mb

Oru\_Chr5  
10.79-11.01Mb

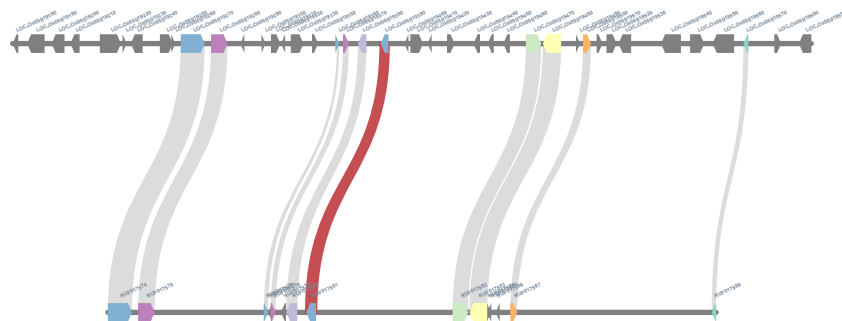

LOC\_Os05g22870 RUF017639

Osa\_Chr5  
12.88-13.16Mb

Oru\_Chr5  
12.02-12.24Mb

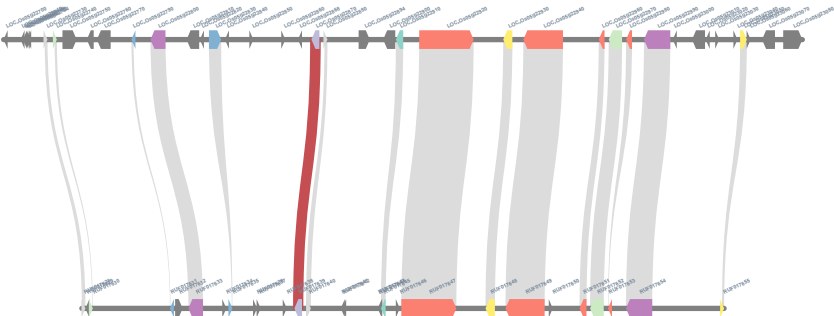

# LOC\_Os05g24930 RUF017735

Osa\_Chr5  
14.33-14.55Mb

Oru\_Chr5  
13.24-13.40Mb

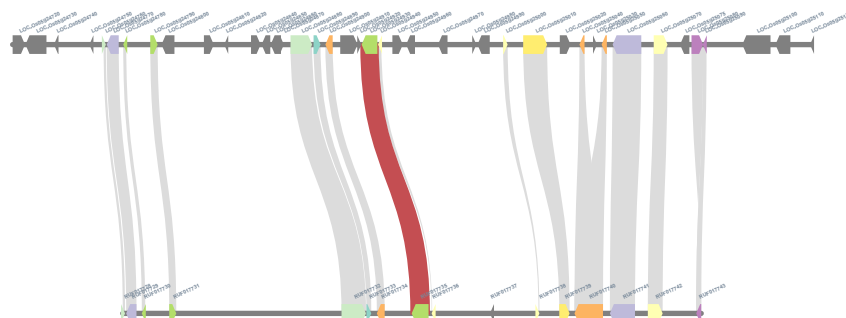

LOC\_Os05g25060 RUF017741

Osa\_Chr5  
14.40-14.66Mb

Oru\_Chr5  
13.30-13.55Mb

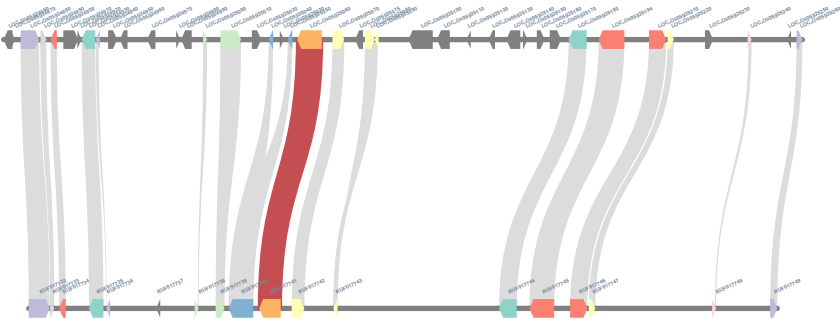

# LOC\_Os05g28720 RUF017950

Osa\_Chr5  
16.67-16.95Mb

Oru\_Chr5  
15.41-15.68Mb

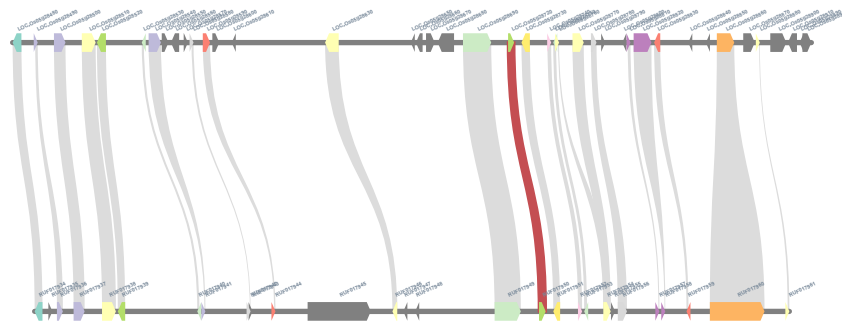

## LOC\_Os05g30240 RUF018011

**Osa\_Chr5**  
17.38-17.66Mb

**Oru\_Chr5**  
16.24-16.50Mb

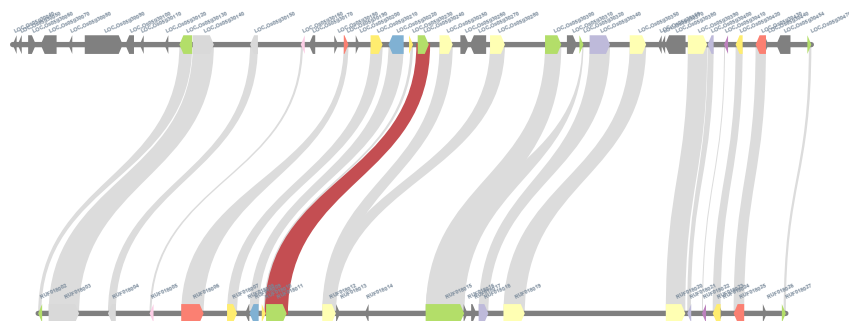



## LOC\_Os05g30710 RUF018052

Osa\_Chr5  
17.69-17.95Mb

Oru\_Chr5  
16.55-16.86Mb

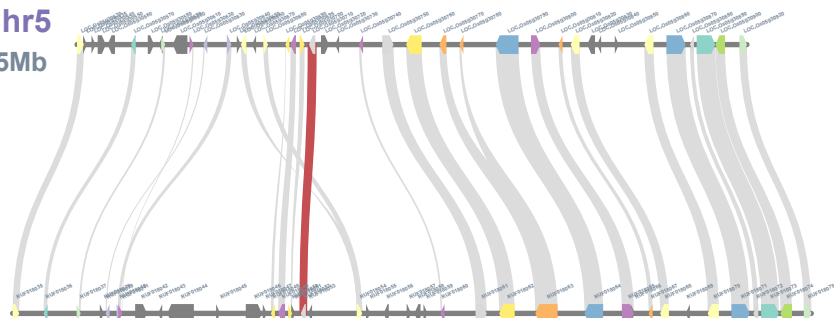

# LOC\_Os05g32730 RUF018213

Osa\_Chr5  
19.00-19.29Mb

Oru\_Chr5  
17.90-18.17Mb

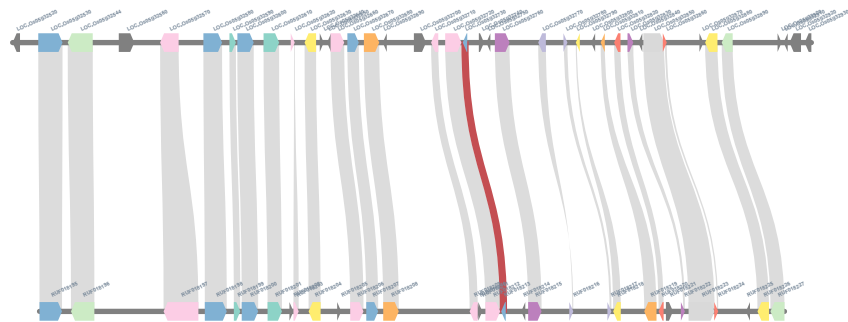

# LOC\_Os05g33760 RUF018297

Osa\_Chr5  
19.71-20.06Mb

Oru\_Chr5  
18.63-18.97Mb

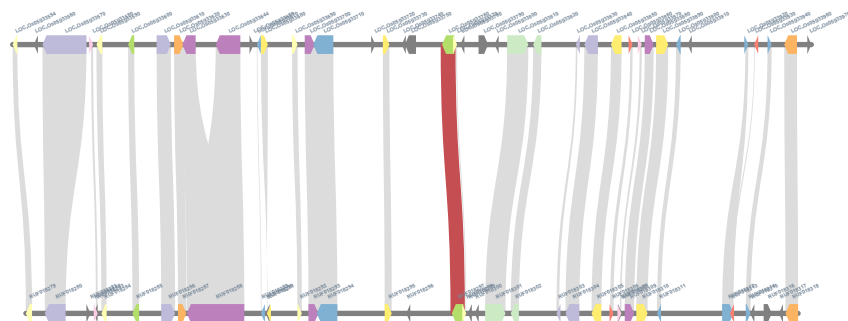

## LOC\_Os05g33920 RUF018312

**Osa\_Chr5**  
19.86-20.18Mb

**Oru\_Chr5**  
18.79-19.07Mb

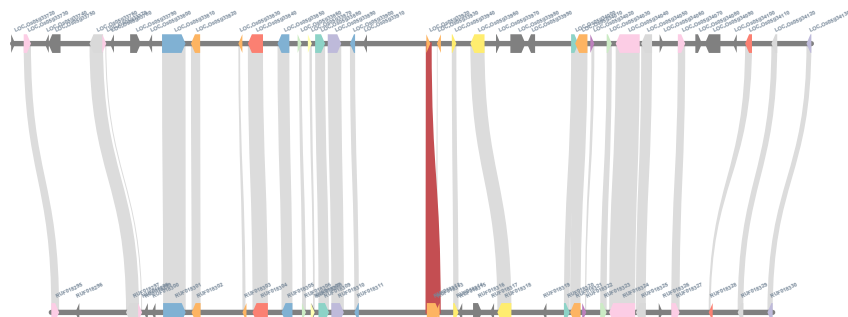

# LOC\_Os05g34570 RUF018377

Osa\_Chr5  
20.37-20.63Mb

Oru\_Chr5  
19.39-19.68Mb

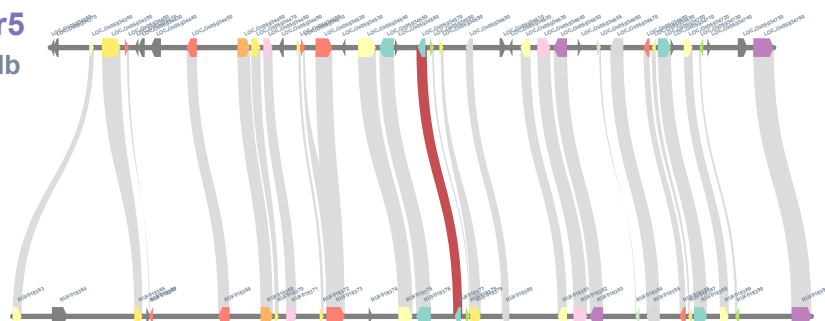

LOC\_Os05g36350 RUF018496

Osa\_Chr5  
21.44-21.64Mb

Oru\_Chr5  
20.57-20.69Mb

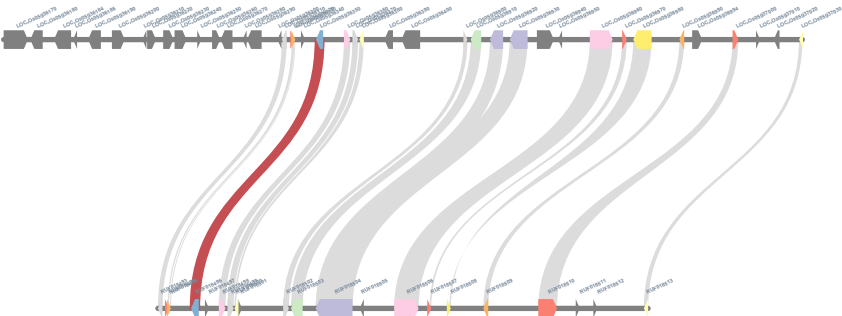

## LOC\_Os05g38190 RUF018588

Osa\_Chr5  
22.29-22.50Mb

Oru\_Chr5  
21.30-21.49Mb

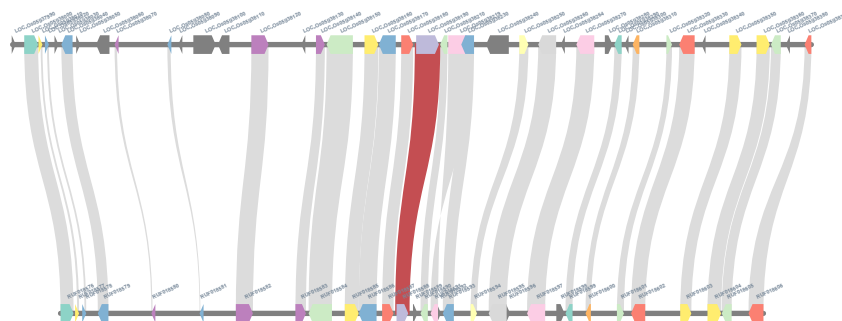

LOC\_Os05g40320 RUF018772

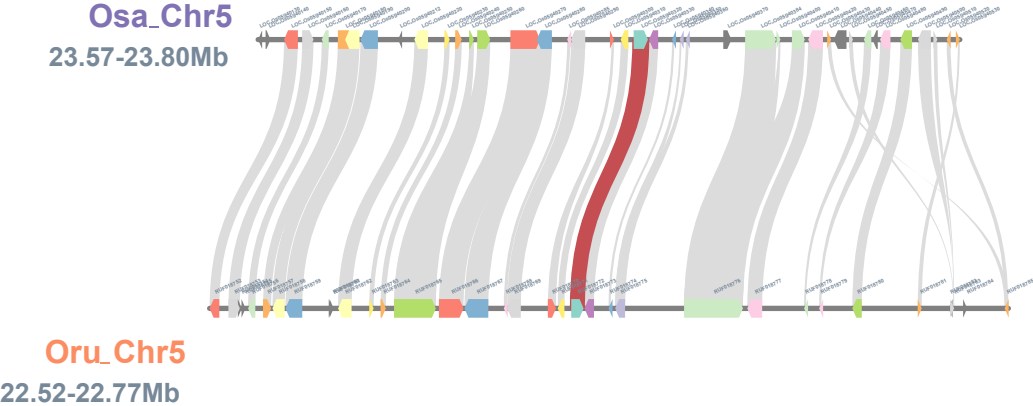



LOC\_Os05g45760 RUF019143

Osa\_Chr5  
26.41-26.63Mb

Oru\_Chr5  
25.27-25.45Mb

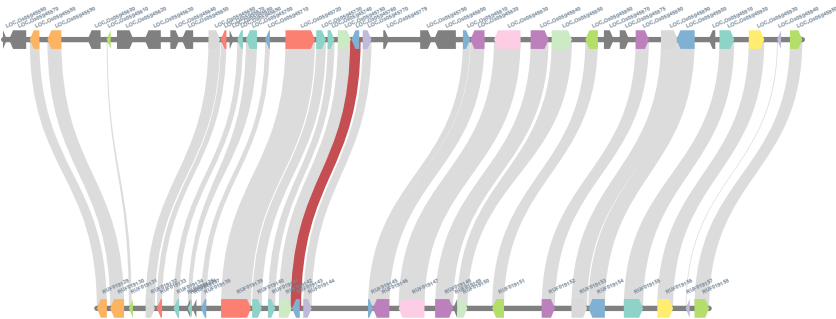

LOC\_Os05g45850 RUF019150

Osa\_Chr5  
26.46-26.71Mb

Oru\_Chr5  
25.29-25.52Mb

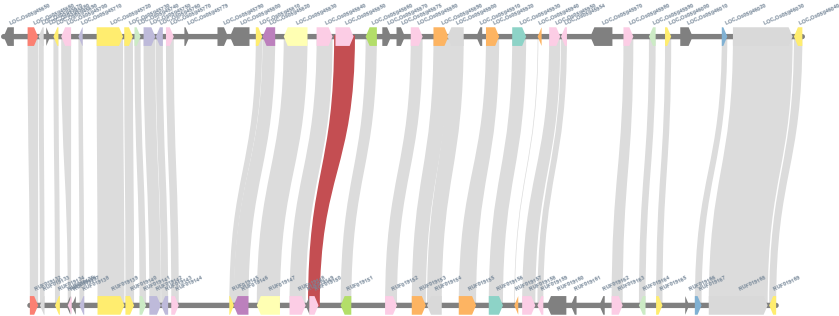

## LOC\_Os05g47510 RUF019239

**Osa\_Chr5**  
27.12-27.34Mb

**Oru\_Chr5**  
25.91-26.07Mb

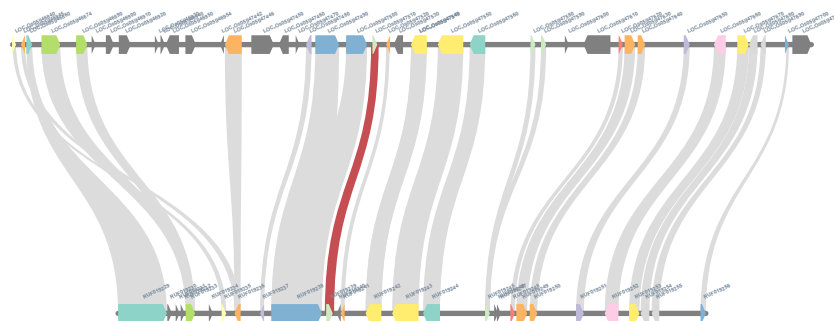

# LOC\_Os05g49740 RUF019430

Osa\_Chr5  
28.42-28.65Mb

Oru\_Chr5  
27.16-27.36Mb

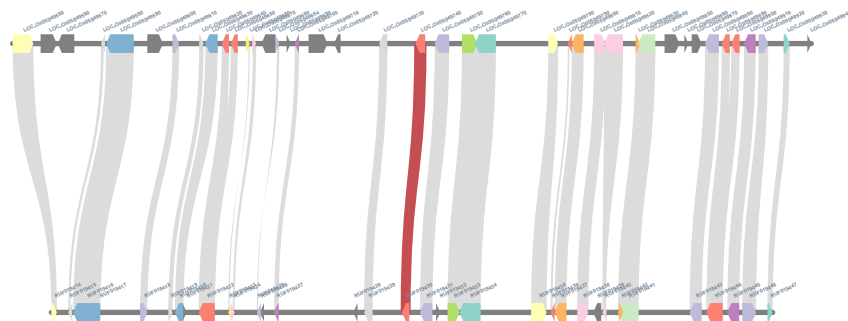

LOC\_Os05g49920 RUF019446

Osa\_Chr5  
28.51-28.74Mb

Oru\_Chr5  
27.25-27.45Mb

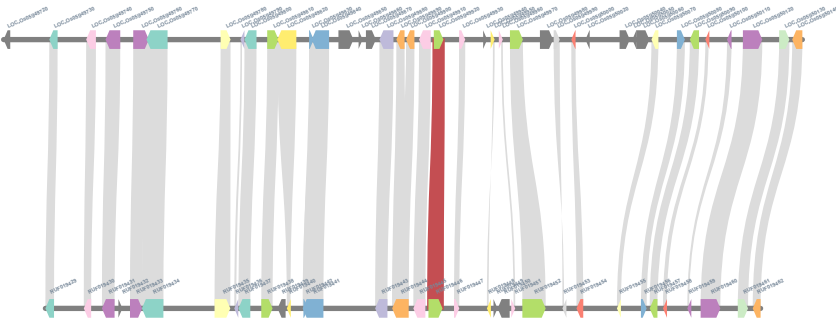

# LOC\_Os05g50460 RUF019488

Osa\_Chr5  
28.80-29.05Mb

Oru\_Chr5  
27.50-27.76Mb

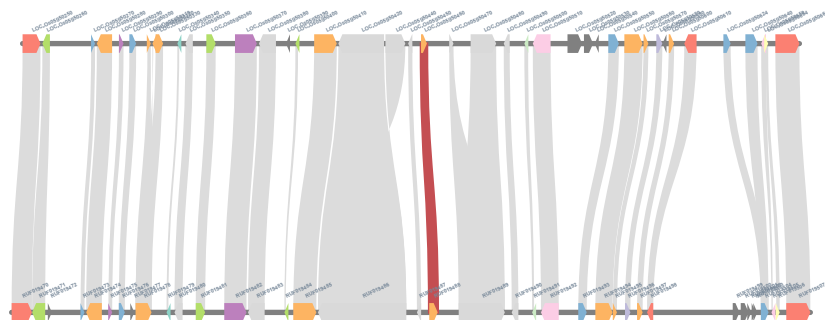

**LOC\_Os05g50690 RUF019508**

## Osa\_Chr5

**28.95-29.18Mb**

Oru\_Chr5

**27.66-27.87Mb**

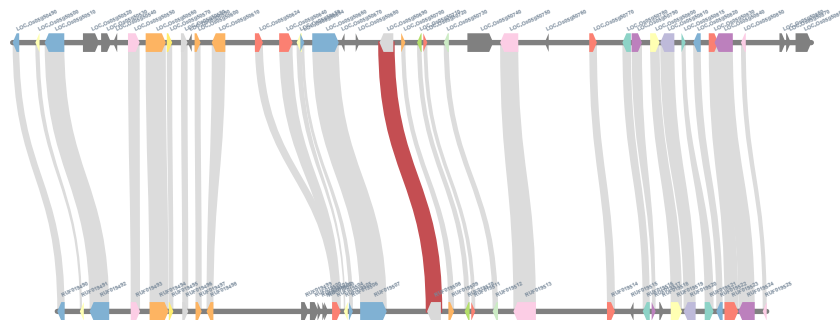

LOC\_Os05g50950 RUF019536

Osa\_Chr5  
29.11-29.35Mb

Oru\_Chr5  
27.82-28.06Mb

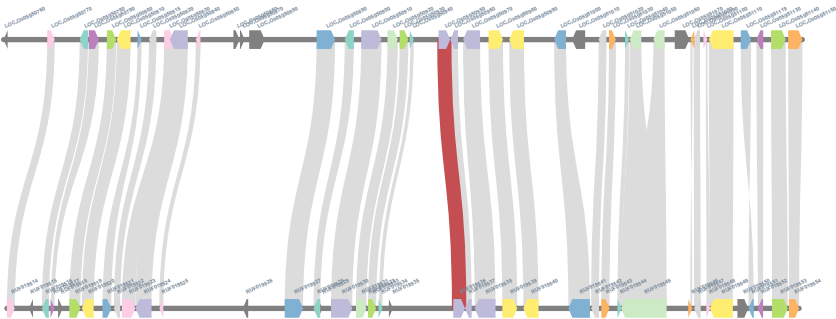



LOC\_Os06g02120 RUF019649

Osa\_Chr6  
0.49-0.78Mb

Oru\_Chr6  
0.10-0.39Mb

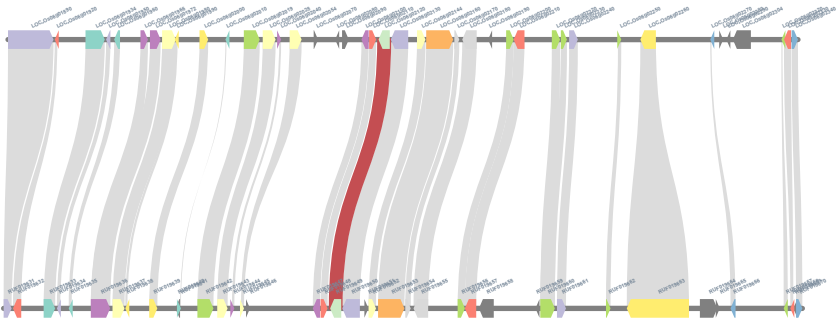

# LOC\_Os06g02200 RUF019656

Osa\_Chr6  
0.55-0.83Mb

Oru\_Chr6  
0.14-0.44Mb

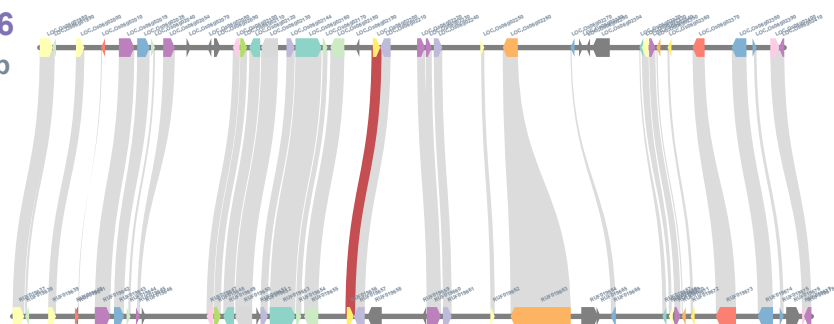

# LOC\_Os06g02400 RUF019677

Osa\_Chr6  
0.67-0.92Mb

Oru\_Chr6  
0.27-0.53Mb

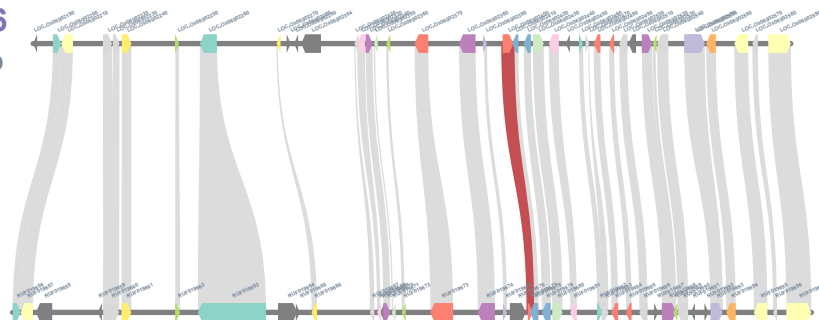

**LOC\_Os06g03530 RUF019756**

## Osa\_Chr6

1.27-1.47Mb

Oru\_Chr6

1.34-1.48Mb

## LOC\_Os06g03570 RUF019760

Osa\_Chr6  
1.28-1.50Mb

Oru\_Chr6  
1.34-1.51Mb

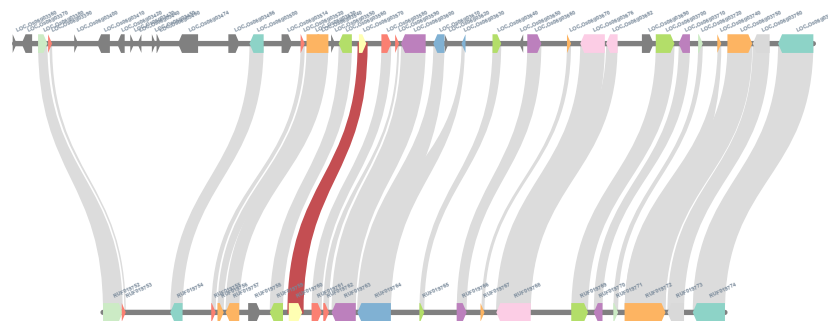

# LOC\_Os06g05140 RUF019886

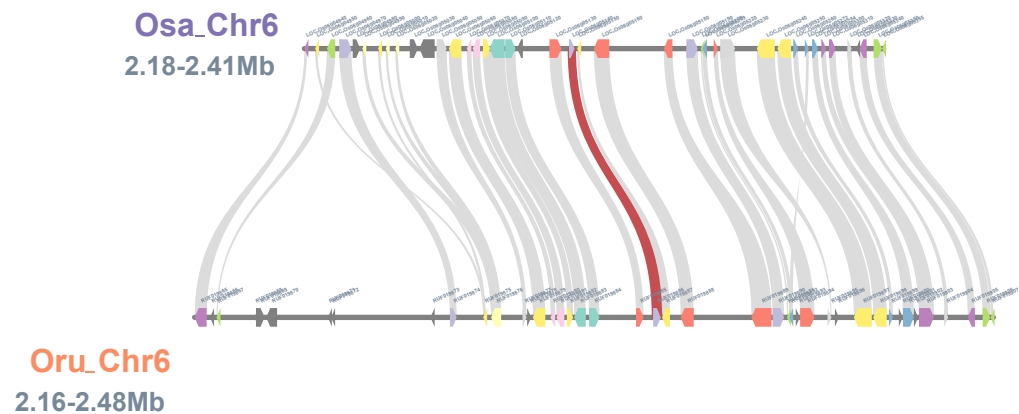

## LOC\_Os06g05920 RUF019965

Osa\_Chr6  
2.59-2.84Mb

Oru\_Chr6  
2.67-2.91Mb

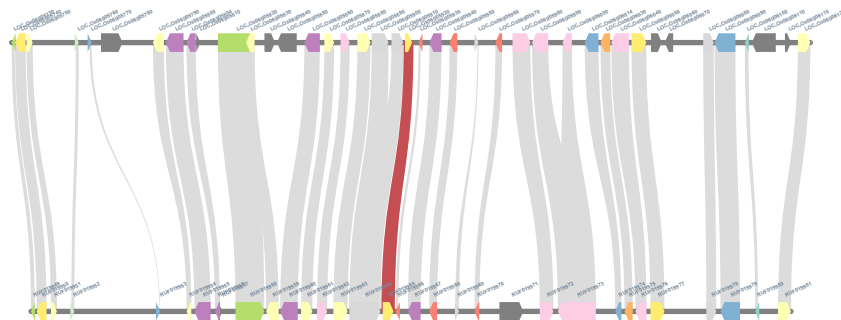

# LOC\_Os06g07550 RUF020110

Osa\_Chr6  
3.54-3.77Mb

Oru\_Chr6  
3.58-3.80Mb

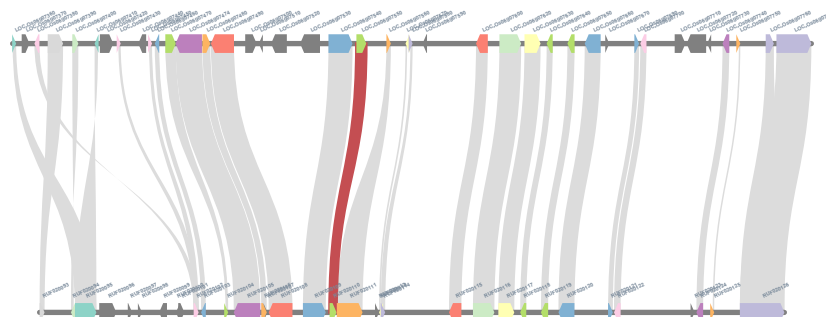



**LOC\_Os06g08570 RUF020177**

## Osa\_Chr6

## Oru\_Chr6

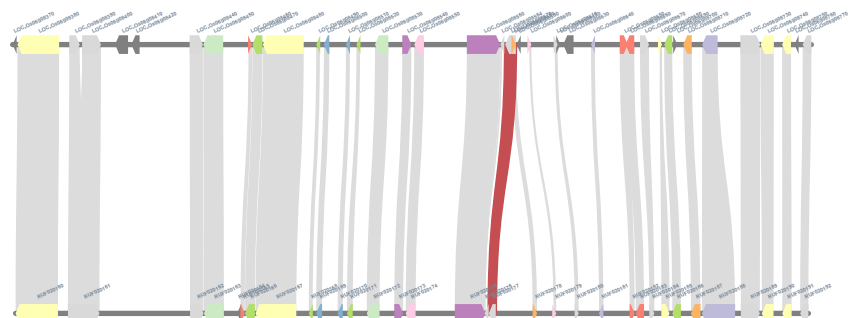

LOC\_Os06g08650 RUF020182

Osa\_Chr6  
4.16-4.44Mb

Oru\_Chr6  
4.14-4.42Mb

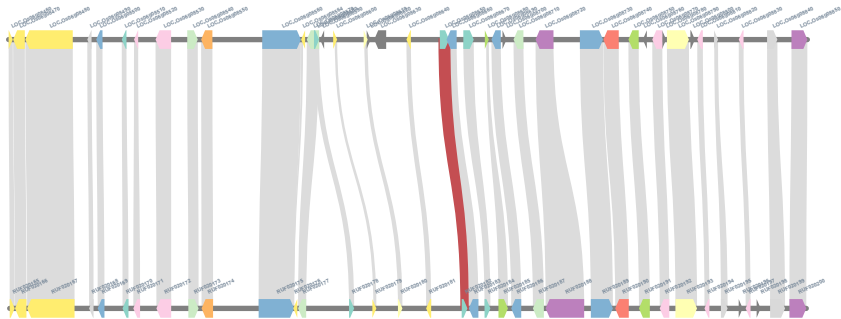

**LOC\_Os06g08660 RUF020183**

**Osa\_Chr6**  
4.16-4.45Mb

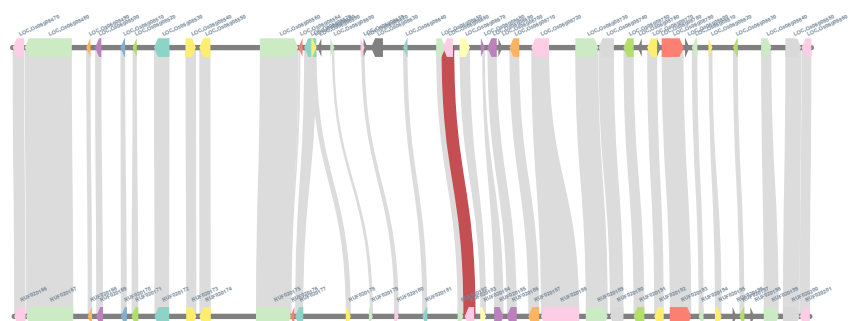

Oru\_Chr6  
4.14-4.43Mb

LOC\_Os06g09880 RUF020270

Osa\_Chr6  
4.91-5.14Mb

Oru\_Chr6  
4.89-5.10Mb

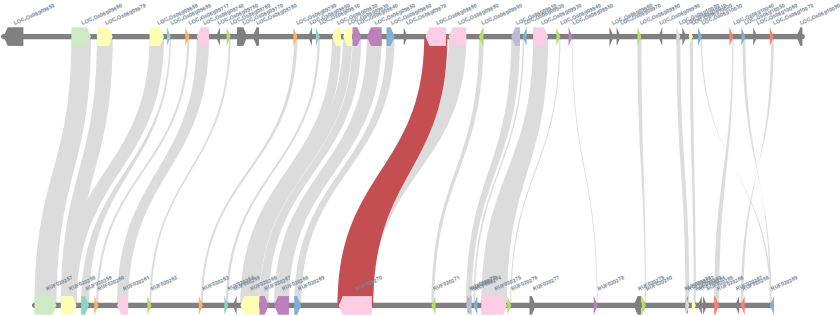

# LOC\_Os06g11300 RUF020385

Osa\_Chr6  
5.82-6.08Mb

Oru\_Chr6  
5.82-6.05Mb

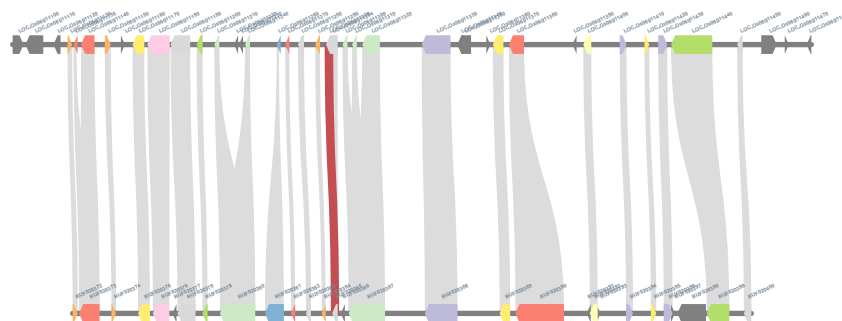

# LOC\_Os06g12360 RUF020471

Osa\_Chr6  
6.50-6.81Mb

Oru\_Chr6  
6.49-6.80Mb

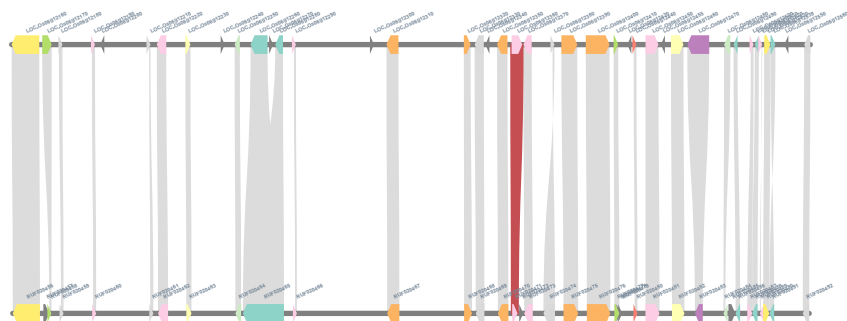

**LOC\_Os06g12510 RUF020488**

## Osa\_Chr6

## 6.65-6.95Mb

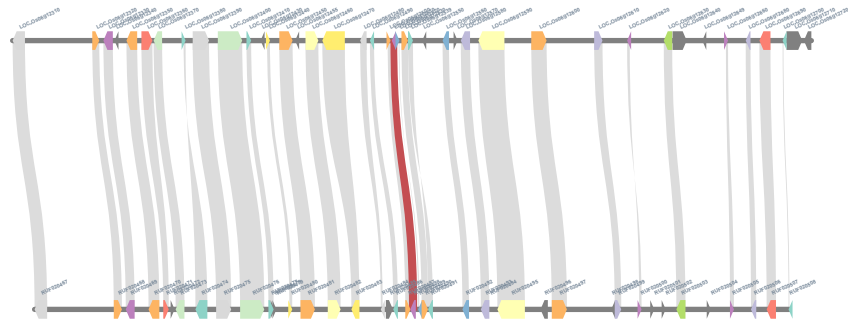

Oru\_Chr6

## 6.63-6.92Mb

# LOC\_Os06g13950 RUF020601

Osa\_Chr6  
7.61-7.90Mb

Oru\_Chr6  
7.65-7.90Mb

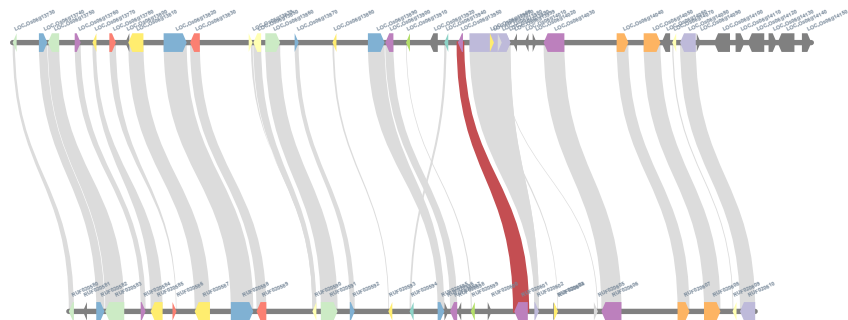



**LOC\_Os06g20870 RUF020951**

## Osa\_Chr6

11.90-12.18Mb

Oru\_Chr6

11.53-11.77Mb

**LOC\_Os06g27790 RUF021238**

**Osa\_Chr6**  
15.61-15.89Mb

**Oru\_Chr6**  
14.39-16.37Mb

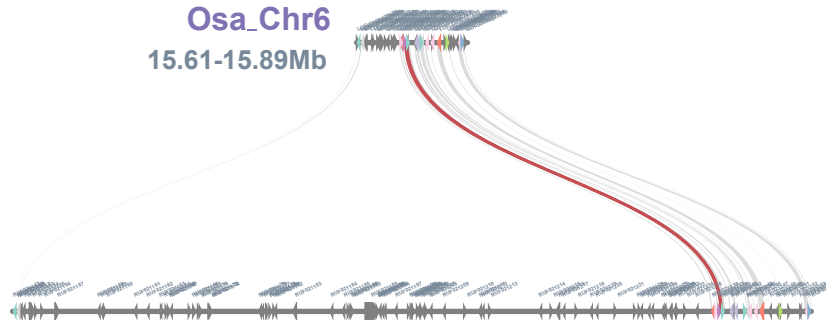

LOC\_Os06g29800 RUF021356

Osa\_Chr6  
16.95-17.29Mb

Oru\_Chr6  
17.78-18.08Mb

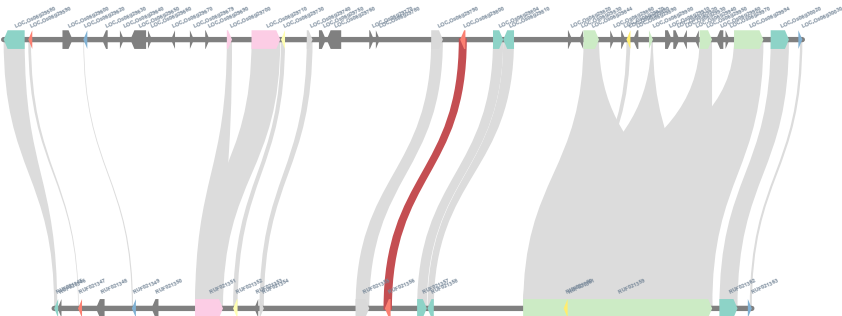

# LOC\_Os06g30420 RUF021381

Osa\_Chr6  
17.41-17.72Mb

Oru\_Chr6  
18.19-18.61Mb

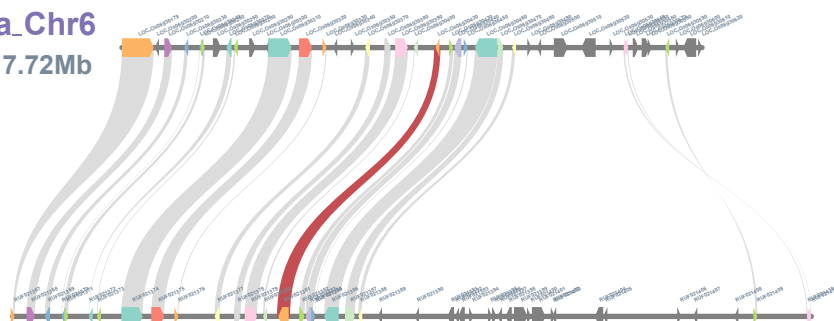

**LOC\_Os06g30940 RUF021426**

**Osa\_Chr6**  
17.83-18.09Mb

**Oru\_Chr6**  
18.40-18.90Mb

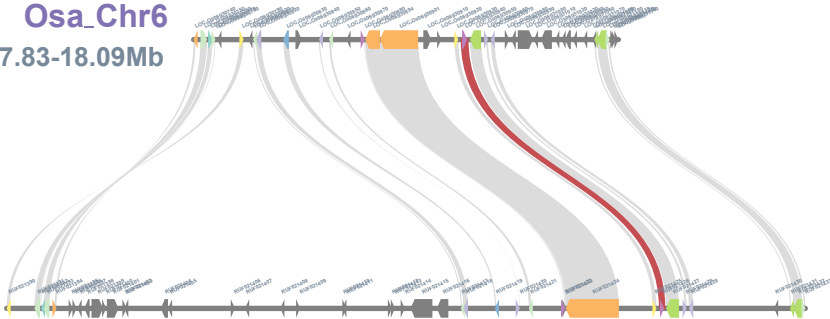

# LOC\_Os06g36910 RUF021672

Osa\_Chr6  
21.61-21.92Mb

Oru\_Chr6  
21.78-22.07Mb

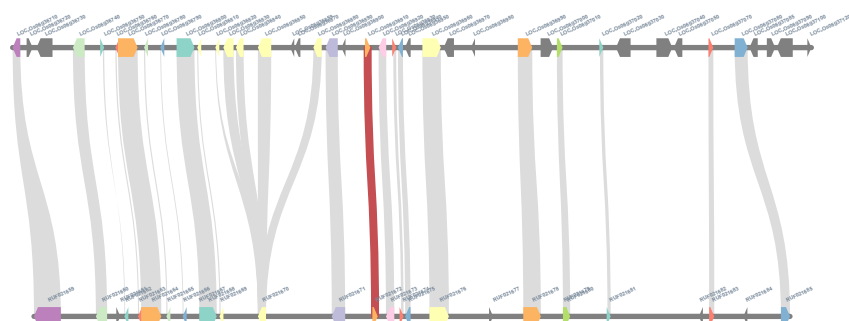

# LOC\_Os06g39650 RUF021796

Osa\_Chr6  
23.41-23.62Mb

Oru\_Chr6  
23.19-23.35Mb

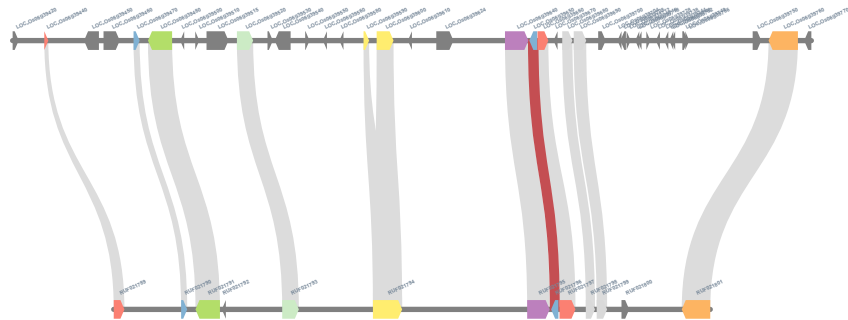

# LOC\_Os06g40860 RUF021883

Osa\_Chr6  
24.24-24.53Mb

Oru\_Chr6  
23.95-24.24Mb

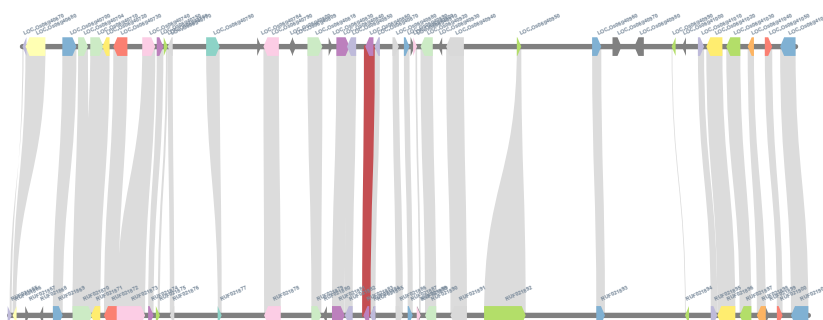



# LOC\_Os06g41040 RUF021898

Osa\_Chr6  
24.36-24.71Mb

Oru\_Chr6  
24.07-24.34Mb

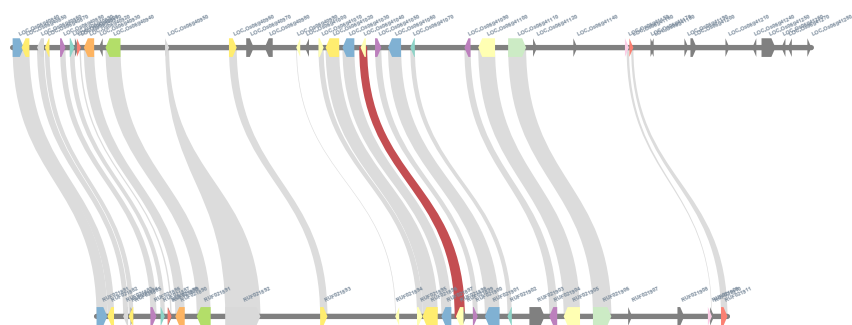

# LOC\_Os06g46840 RUF022354

Osa\_Chr6  
28.29-28.52Mb

Oru\_Chr6  
28.01-28.25Mb

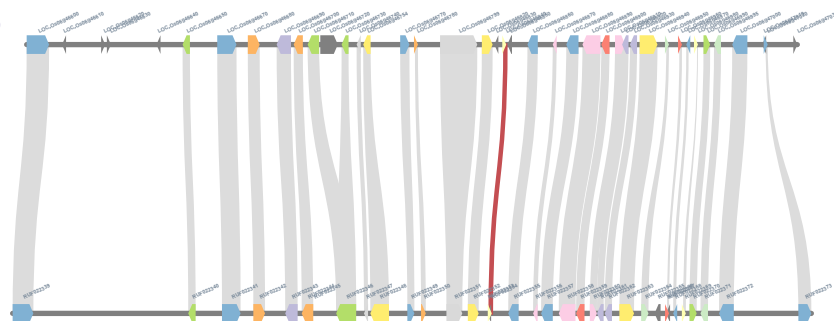

## LOC\_Os06g47570 RUF022412

**Osa\_Chr6**  
28.71-28.92Mb

**Oru\_Chr6**  
28.42-28.64Mb

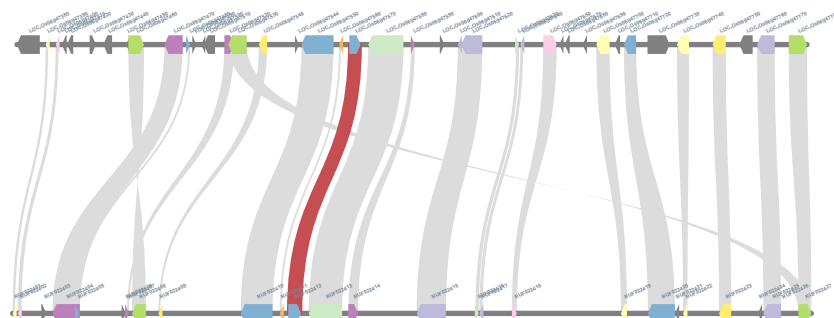

# LOC\_Os06g47920 RUF022442

Osa\_Chr6  
28.87-29.12Mb

Oru\_Chr6  
28.59-28.80Mb

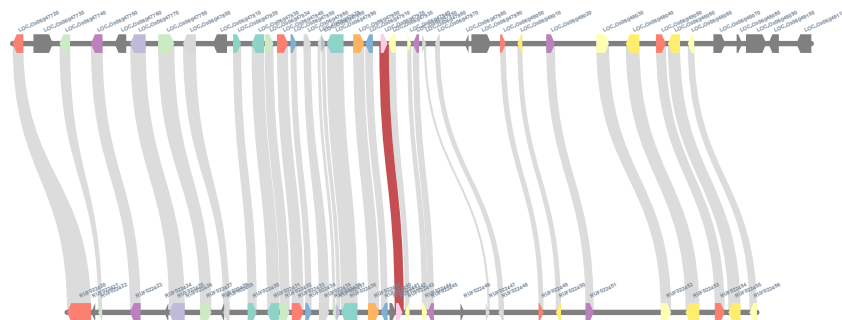

## LOC\_Os06g47950 RUF022445

**Osa\_Chr6**  
28.90-29.12Mb

**Oru\_Chr6**  
28.61-28.80Mb

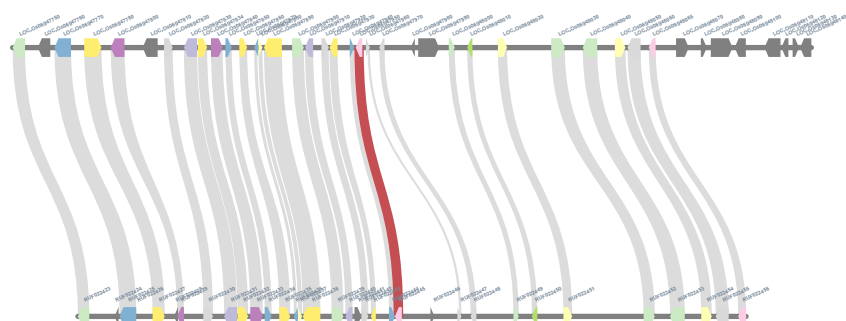

LOC\_Os06g49670 RUF022558

Osa\_Chr6  
29.97-30.19Mb

Oru\_Chr6  
29.50-29.69Mb

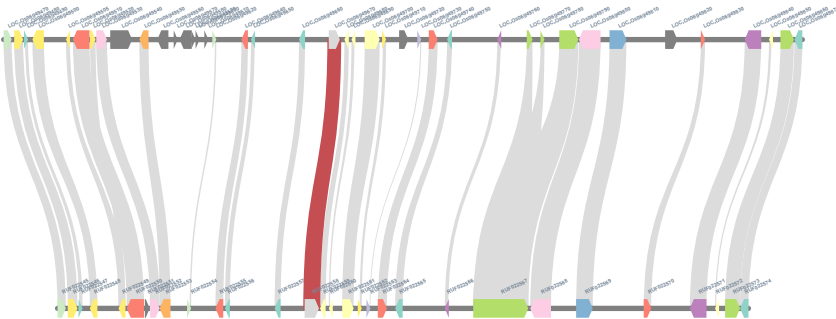

LOC\_Os07g02280 RUF022780

Osa\_Chr7  
0.63-0.87Mb

Oru\_Chr7  
0.63-0.87Mb

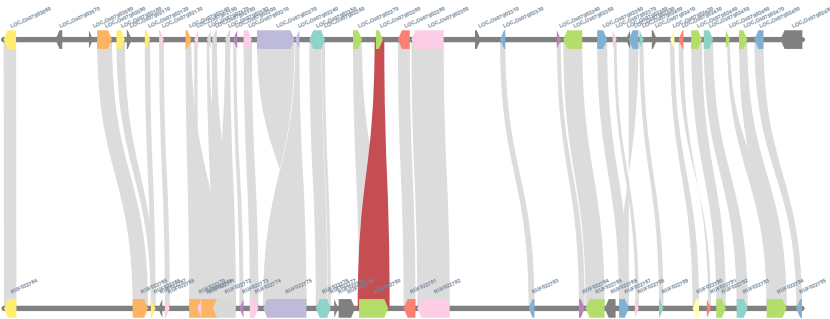

**LOC\_Os07g05560 RUF022958**

## Osa\_Chr7

2.46-2.78Mb

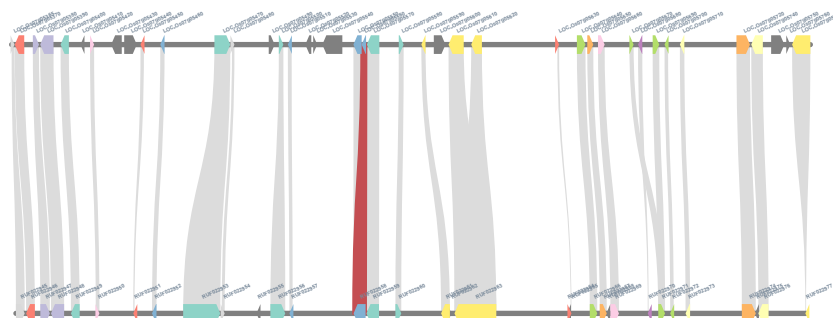

Oru\_Chr7

**2.38-2.70Mb**



## LOC\_Os07g06960 RUF023051

Osa\_Chr7  
3.31-3.57Mb

Oru\_Chr7  
3.18-3.52Mb

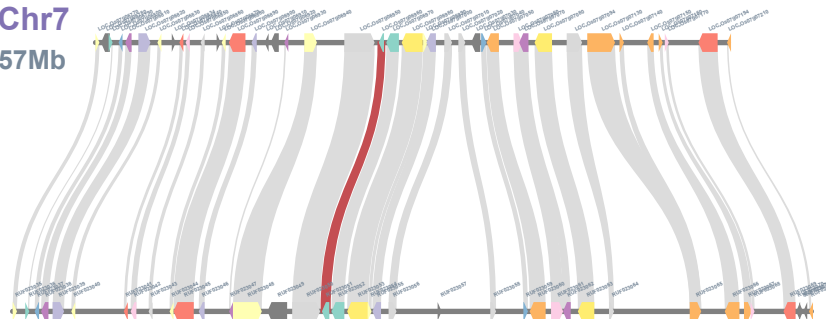

## LOC\_Os07g07620 RUF023118

**Osa\_Chr7**  
3.70-3.93Mb

**Oru\_Chr7**  
3.65-3.84Mb

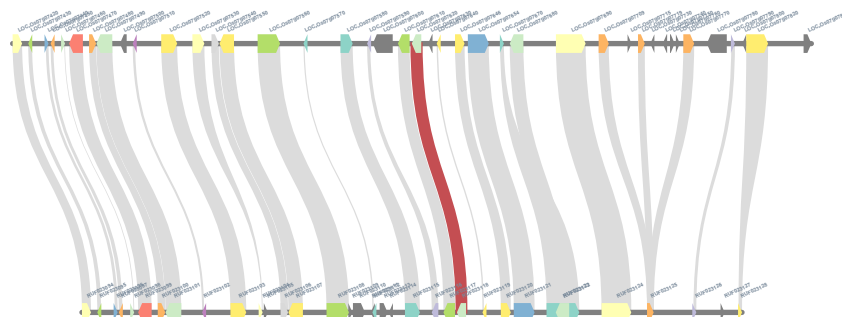

# LOC\_Os07g08180 RUF023153

Osa\_Chr7  
3.98-4.32Mb

Oru\_Chr7  
3.87-4.24Mb

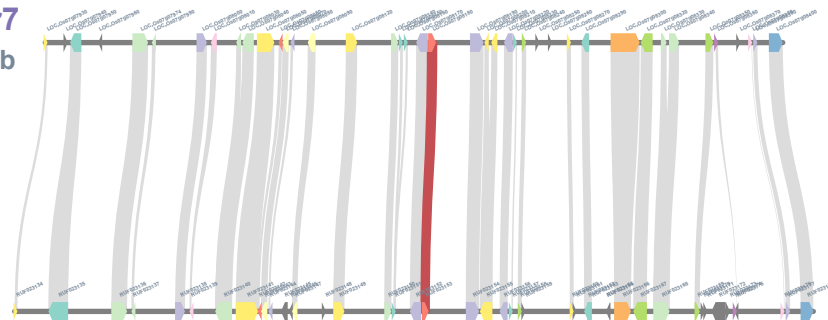

LOC\_Os07g09370 RUF023258

Osa\_Chr7  
4.77-5.10Mb

Oru\_Chr7  
4.72-5.04Mb

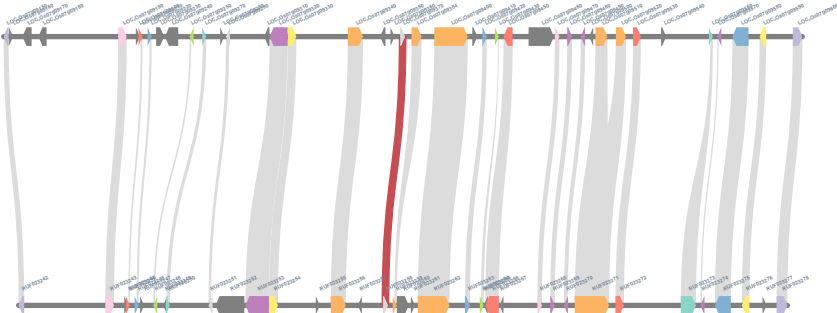

## LOC\_Os07g10400 RUF023348

Osa\_Chr7  
5.49-5.75Mb

Oru\_Chr7  
5.45-5.70Mb

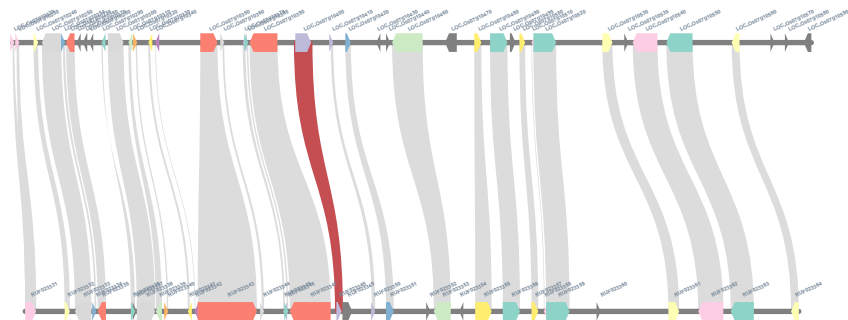

# LOC\_Os07g11280 RUF023408

Osa\_Chr7  
6.12-6.32Mb

Oru\_Chr7  
6.10-6.31Mb

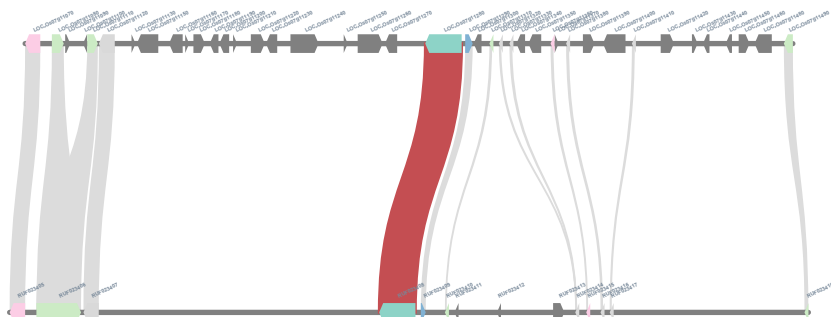

# LOC\_Os07g12140 RUF023435

Osa\_Chr7  
6.61-6.95Mb

Oru\_Chr7  
6.49-6.77Mb

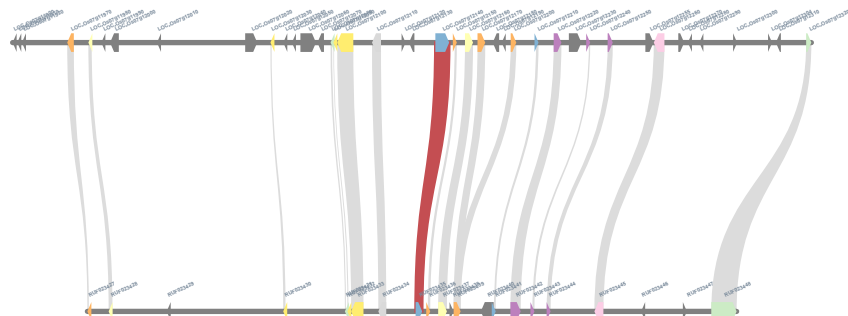

LOC\_Os07g13540 RUF023508

Osa\_Chr7  
7.65-7.91Mb

Oru\_Chr7  
7.40-8.15Mb

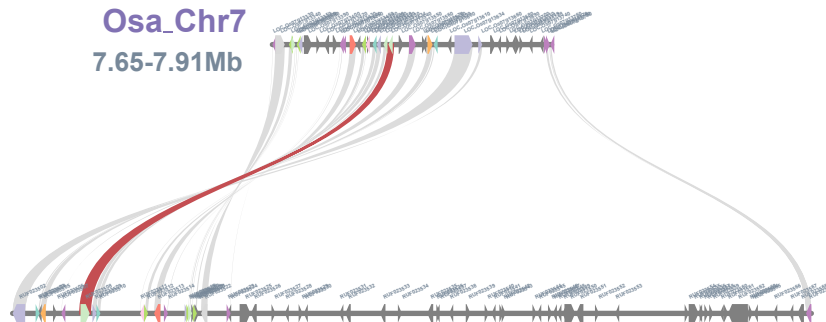



## LOC\_Os07g14100 RUF023550

Osa\_Chr7  
7.95-8.16Mb

Oru\_Chr7  
8.09-7.85Mb

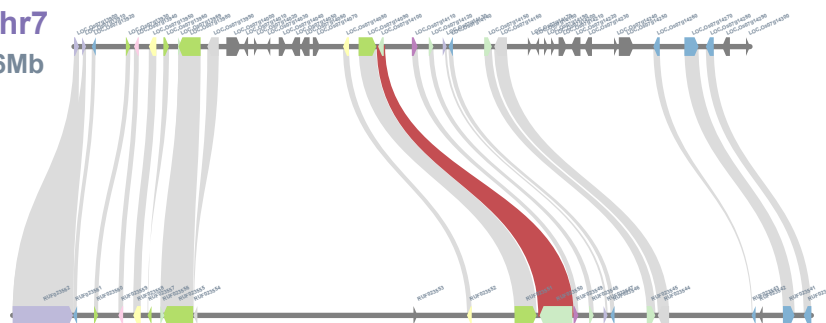

LOC\_Os07g14530 RUF023583

Osa\_Chr7  
8.17-8.43Mb

Oru\_Chr7  
7.79-8.58Mb

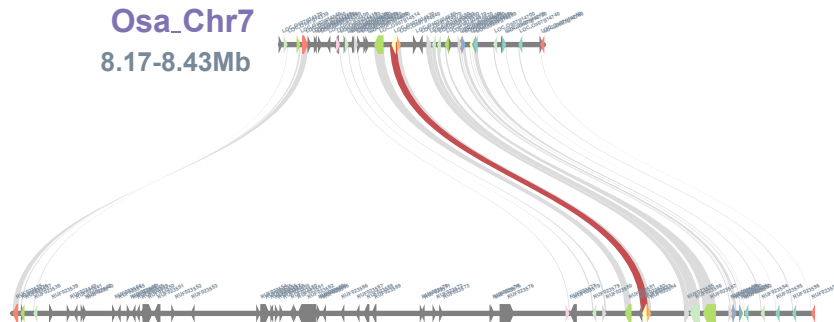

LOC\_Os07g15570 RUF023640

Osa\_Chr7  
8.86-9.16Mb

Oru\_Chr7  
8.99-9.33Mb

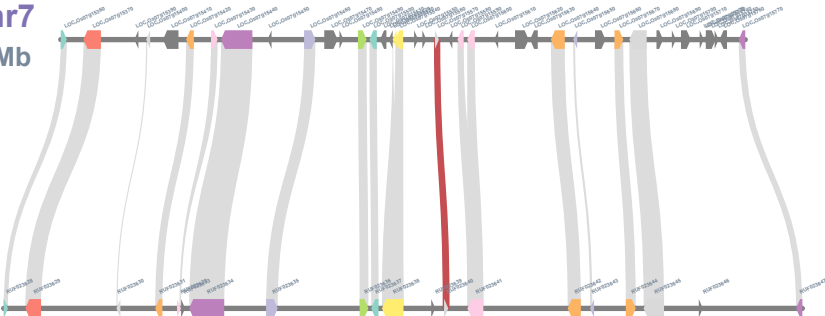

# LOC\_Os07g15640 RUF023642

Osa\_Chr7  
8.93-9.21Mb

Oru\_Chr7  
9.07-9.36Mb

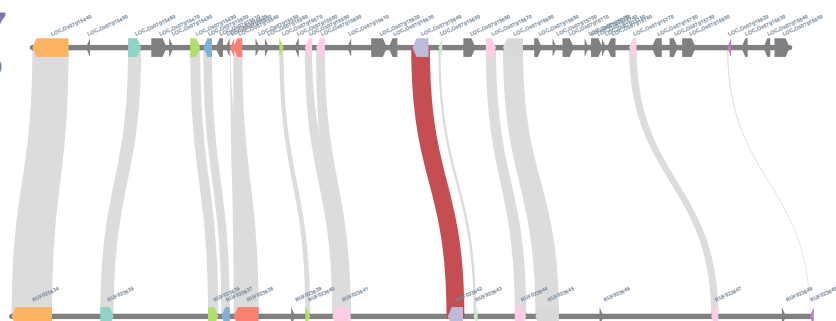

# LOC\_Os07g20510 RUF025656

Osa\_Chr7  
11.81-11.99Mb

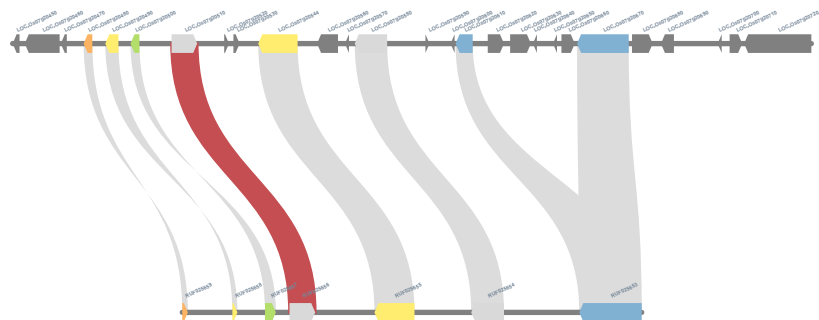

Oru\_Chr7  
11.14-11.03Mb

## LOC\_Os07g25500 RUF023918

Osa\_Chr7  
14.44-14.76Mb

Oru\_Chr7  
12.80-13.08Mb

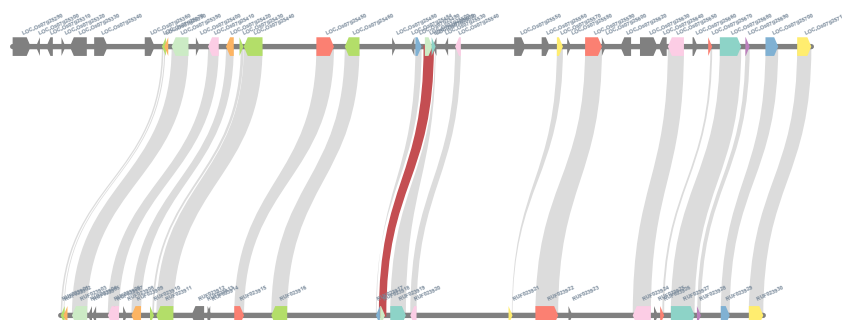

LOC\_Os07g30930 RUF024185

Osa\_Chr7  
18.18-18.43Mb

Oru\_Chr7  
16.21-16.44Mb

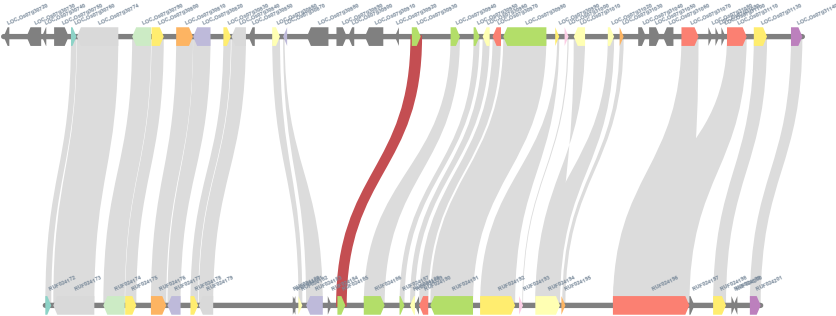

# LOC\_Os07g32900 RUF024339

Osa\_Chr7  
19.50-19.77Mb

Oru\_Chr7  
17.49-17.70Mb

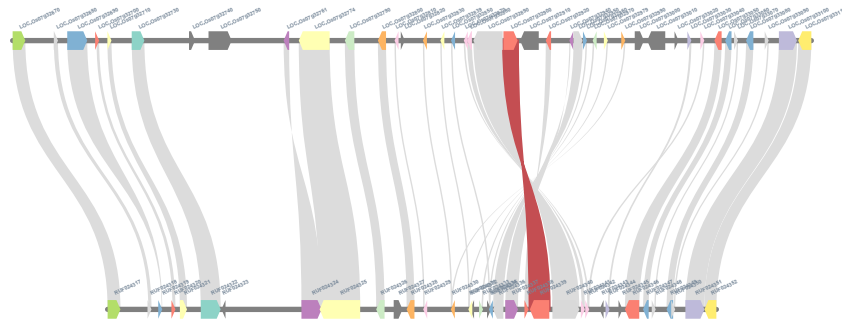



LOC\_Os07g36390 RUF024596

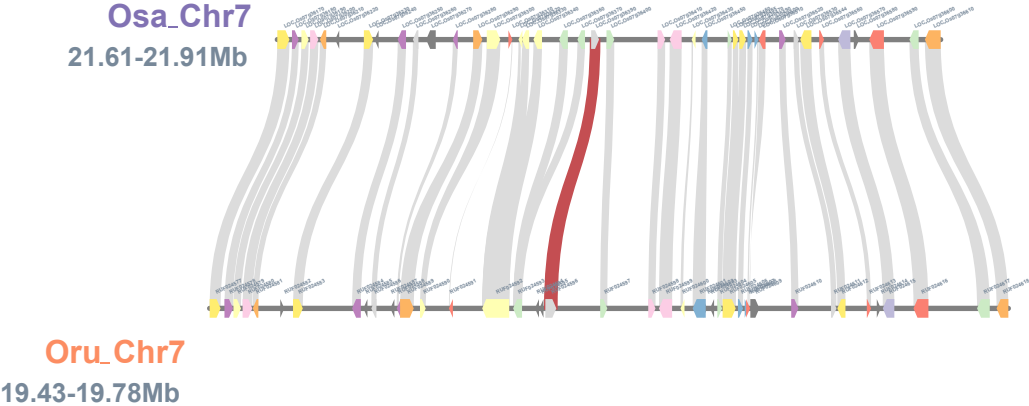

LOC\_Os07g39090 RUF024803

Osa\_Chr7  
23.32-23.53Mb

Oru\_Chr7  
21.20-21.36Mb

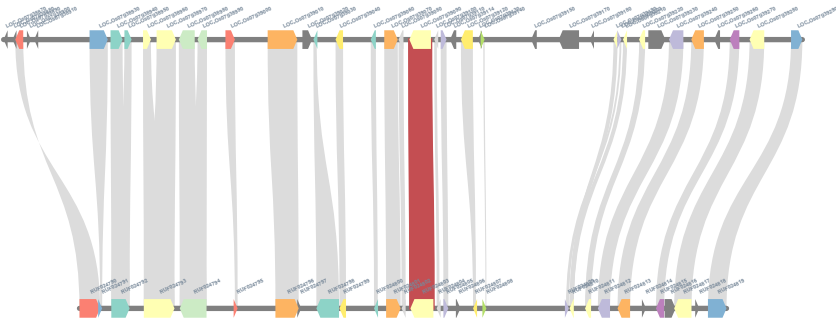

LOC\_Os07g39910 RUF024871

Osa\_Chr7  
23.80-24.07Mb

Oru\_Chr7  
21.64-21.94Mb

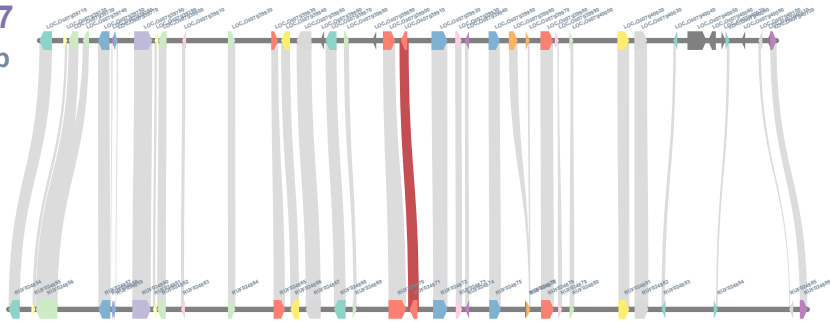

# LOC\_Os07g40120 RUF024886

Osa\_Chr7  
23.93-24.18Mb

Oru\_Chr7  
21.79-22.06Mb

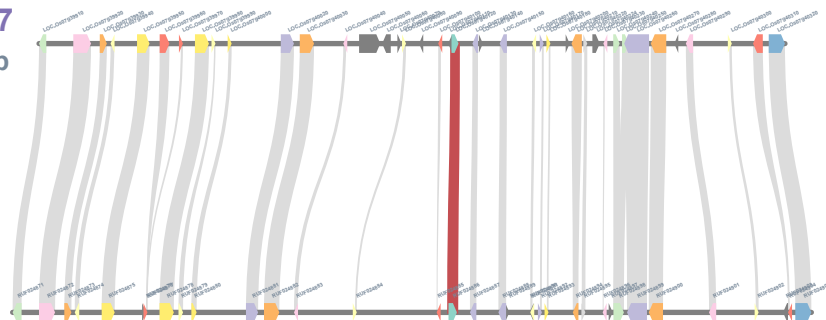

**LOC\_Os07g40750 RUF024935**

Osa\_Chr7  
24.29-24.51Mb

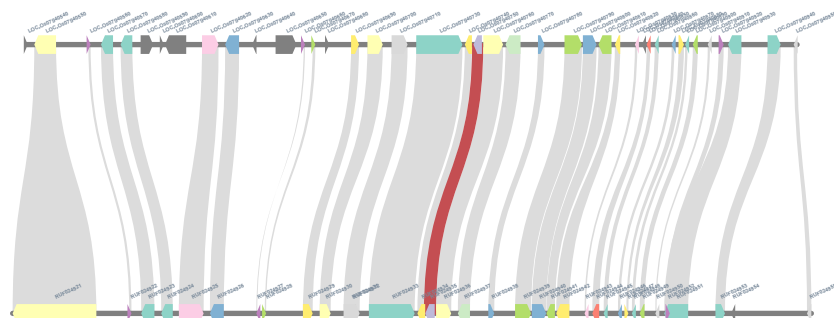

Oru\_Chr7  
22.14-22.37Mb

## LOC\_Os07g40800 RUF024940

Osa\_Chr7  
24.32-24.54Mb

Oru\_Chr7  
22.19-22.38Mb

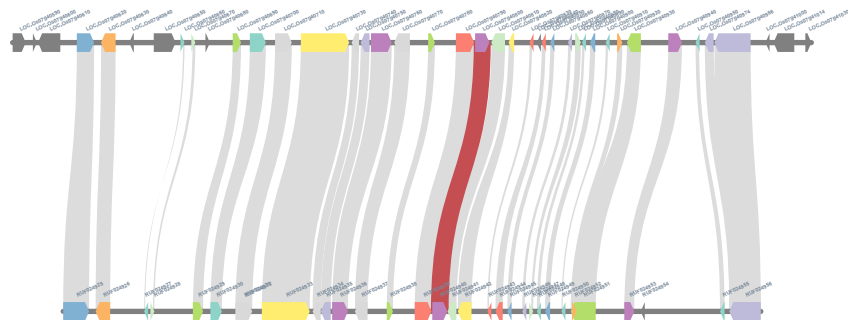

# LOC\_Os07g40820 RUF024942

Osa\_Chr7  
24.33-24.56Mb

Oru\_Chr7  
22.19-22.42Mb

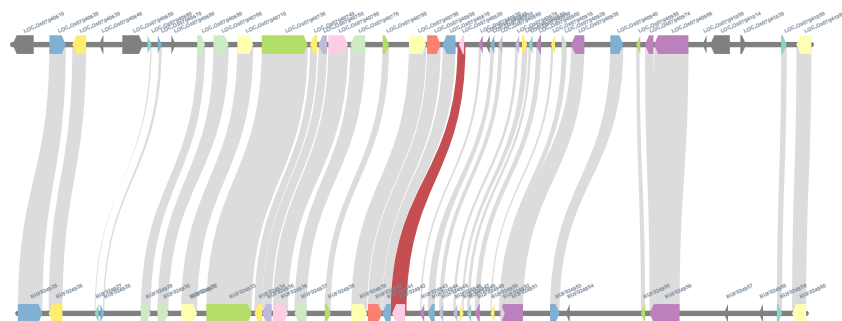

**LOC\_Os07g41260 RUF024978**

## Osa\_Chr7

**24.56-24.85Mb**

Oru\_Chr7

**22.41-22.70Mb**

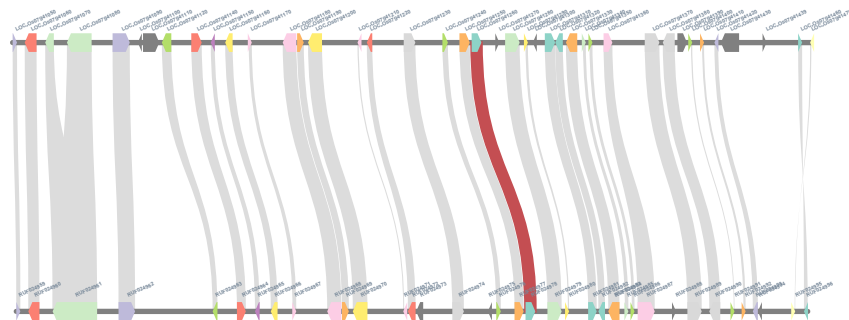



LOC\_Os07g42354 RUF025043

Osa\_Chr7  
25.20-25.47Mb

Oru\_Chr7  
22.91-23.19Mb

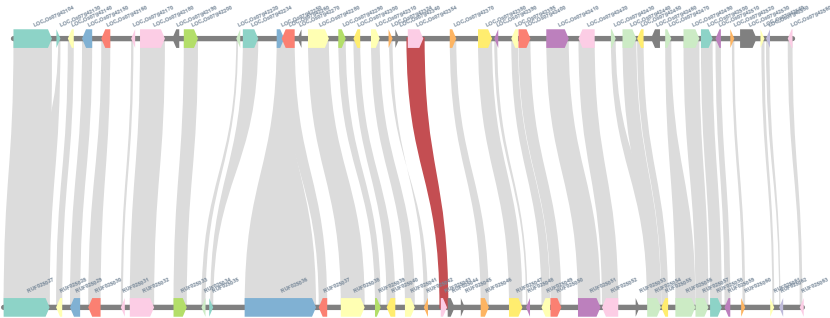

# LOC\_Os07g42880 RUF025087

Osa\_Chr7  
25.53-25.82Mb

Oru\_Chr7  
23.25-23.54Mb

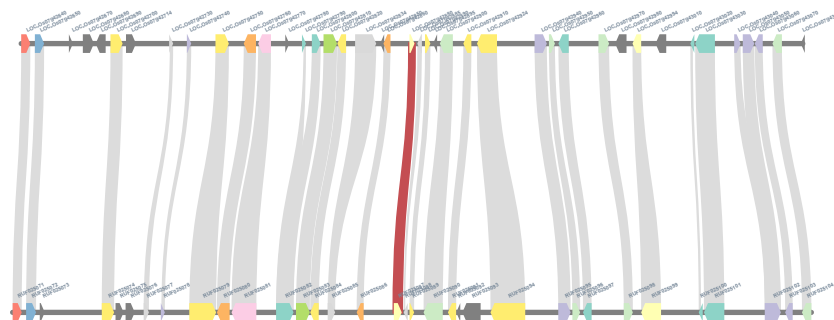

## LOC\_Os07g42880 RUF025087

**Osa\_Chr7**  
26.29-26.52Mb

**Oru\_Chr7**  
24.01-24.24Mb

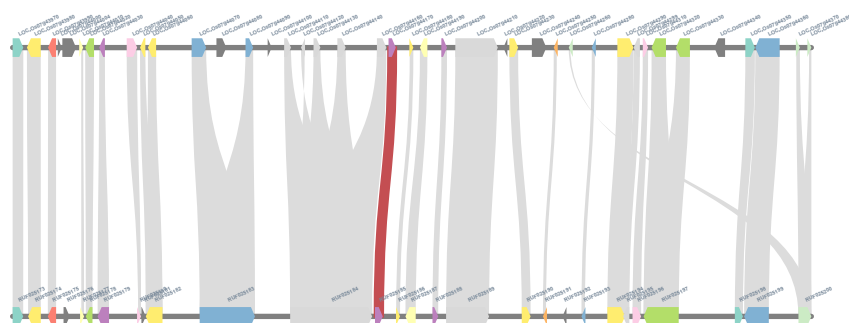

# LOC\_Os07g44299 RUF025195

Osa\_Chr7  
26.35-26.59Mb

Oru\_Chr7  
24.06-24.28Mb

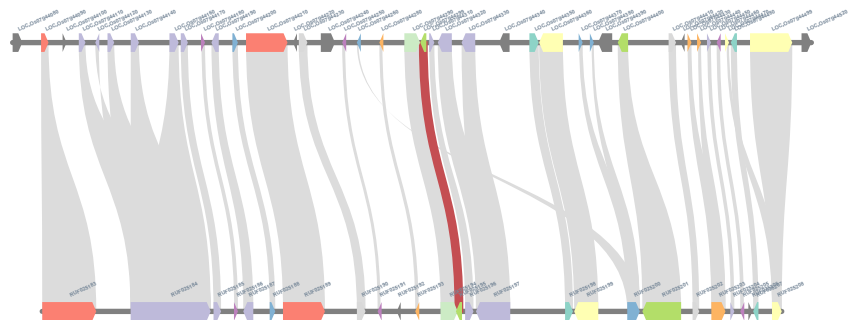

LOC\_Os07g46730 RUF025381

Osa\_Chr7  
27.79-28.06Mb

Oru\_Chr7  
25.42-25.67Mb

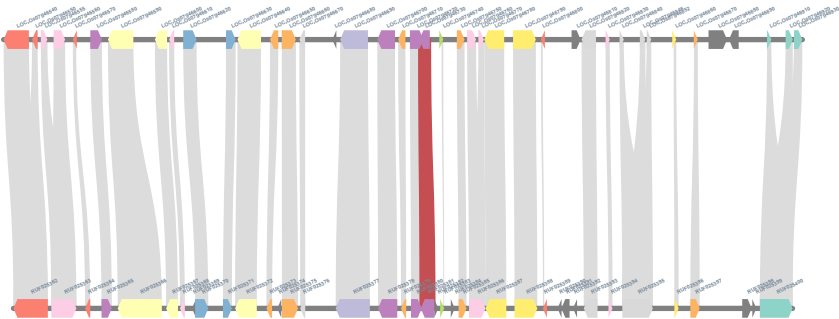

## LOC\_Os07g46770 RUF025386

Osa\_Chr7  
27.81-28.07Mb

Oru\_Chr7  
25.44-25.69Mb

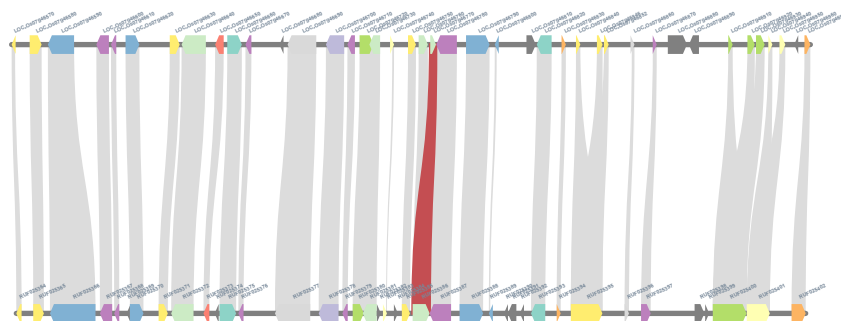

LOC\_Os07g47370 RUF025442

Osa\_Chr7  
28.21-28.45Mb

Oru\_Chr7  
25.83-26.07Mb

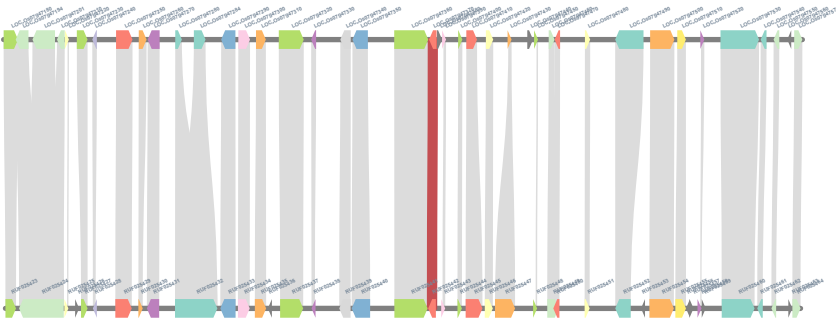

## LOC\_Os07g47470 RUF025450

Osa\_Chr7  
28.26-28.49Mb

Oru\_Chr7  
25.88-26.10Mb

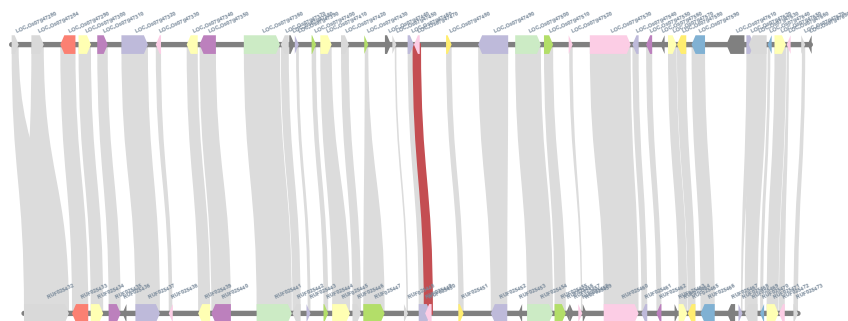



**LOC\_Os07g47720 RUF025476**

**Osa\_Chr7**  
28.41-28.62Mb

**Oru\_Chr7**  
26.03-26.37Mb

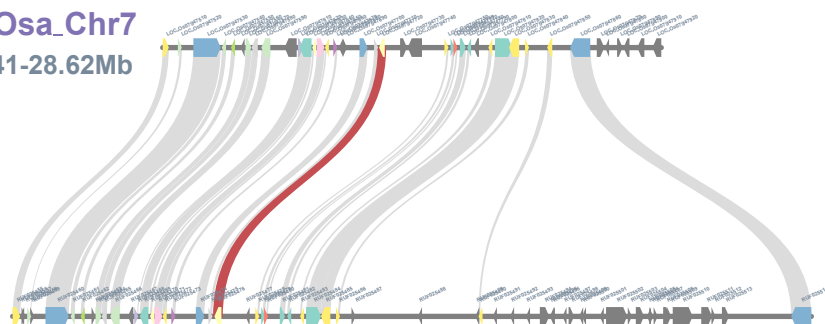

LOC\_Os07g48850 RUF025592

Osa\_Chr7  
29.12-29.38Mb

Oru\_Chr7  
27.08-27.35Mb

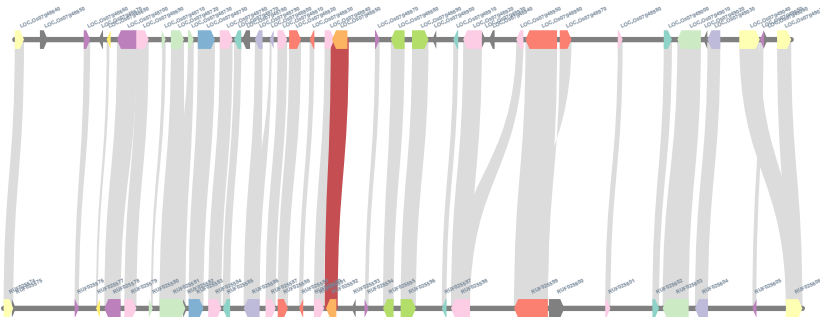

## LOC\_Os08g01640 RUF025726

Osa\_Chr8  
0.29-0.53Mb

Oru\_Chr8  
0.95-1.20Mb

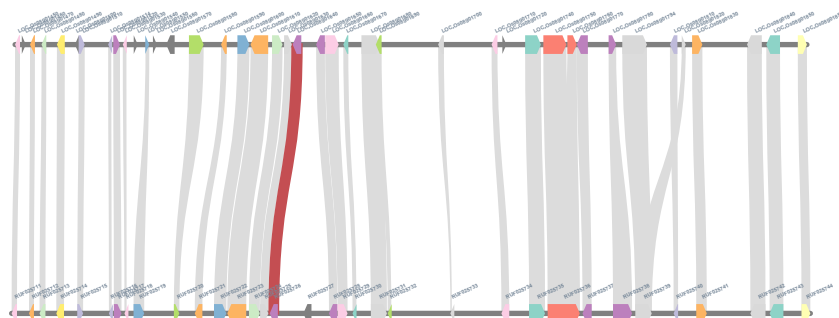

## LOC\_Os08g01650 RUF025728

**Osa\_Chr8**  
0.29-0.54Mb

**Oru\_Chr8**  
0.96-1.20Mb

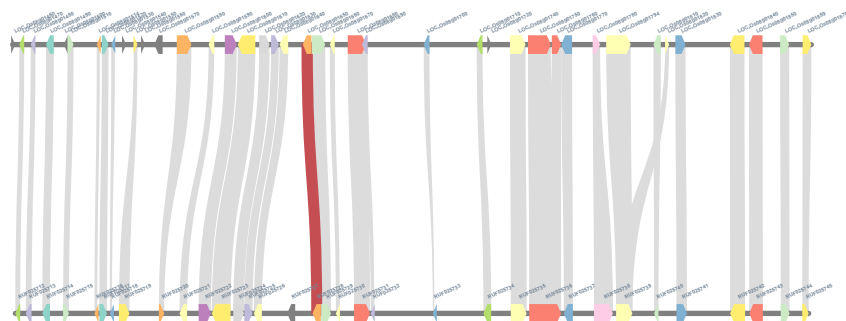

# LOC\_Os08g01870 RUF025745

Osa\_Chr8  
0.38-0.68Mb

Oru\_Chr8  
1.05-1.34Mb

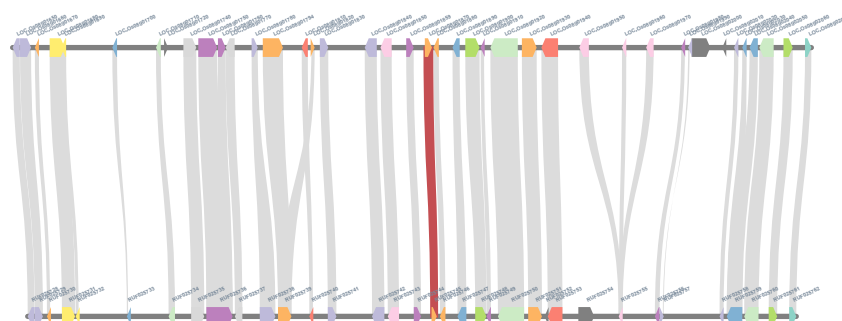

## LOC\_Os08g02040 RUF025759

**Osa\_Chr8**  
0.51-0.80Mb

**Oru\_Chr8**  
1.18-1.46Mb

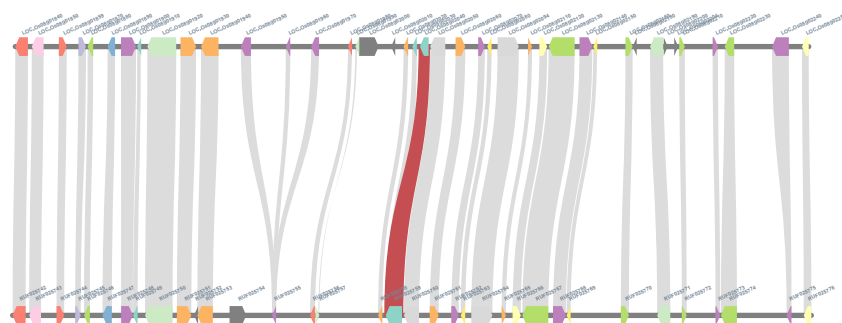

**LOC\_Os08g03676 RUF025885**

## Osa\_Chr8

1.63-1.84Mb

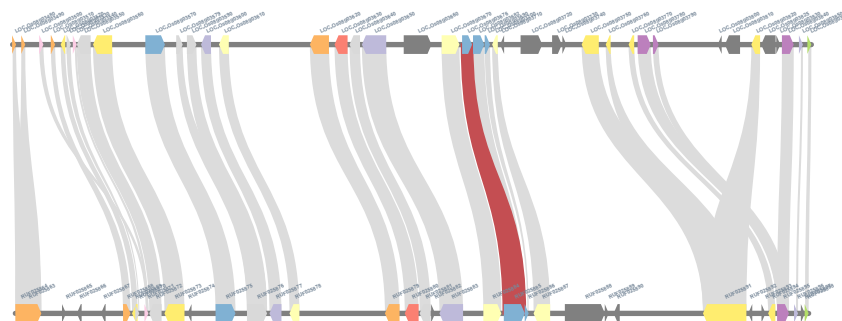

## Oru\_Chr8

## 2.30-2.51Mb

LOC\_Os08g04400 RUF025928

Osa\_Chr8  
2.03-2.30Mb

Oru\_Chr8  
2.66-2.90Mb

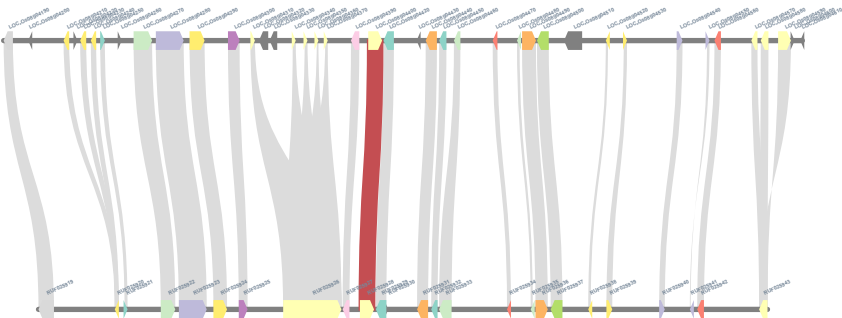



# LOC\_Os08g05750 RUF026027

Osa\_Chr8  
2.97-3.24Mb

Oru\_Chr8  
3.66-4.01Mb

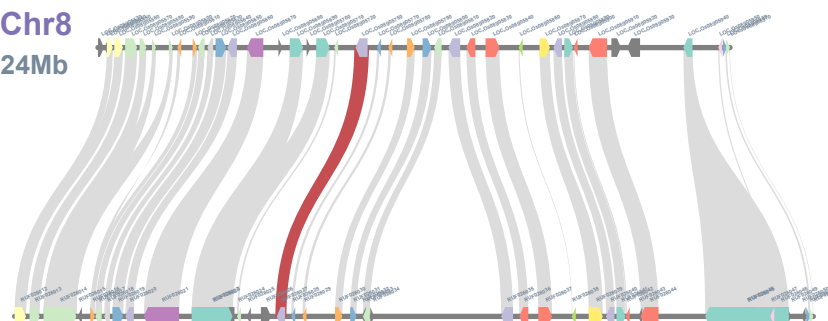

## LOC\_Os08g06490 RUF026101

Osa\_Chr8  
3.48-3.76Mb

Oru\_Chr8  
4.25-4.51Mb

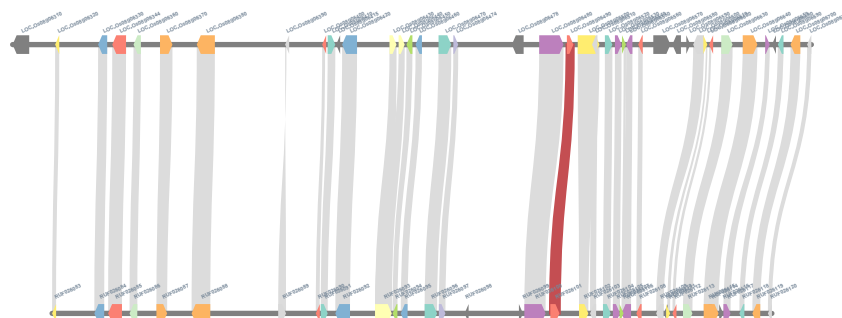

**LOC\_Os08g06500 RUF026102**

## Osa\_Chr8

3.49-3.77Mb

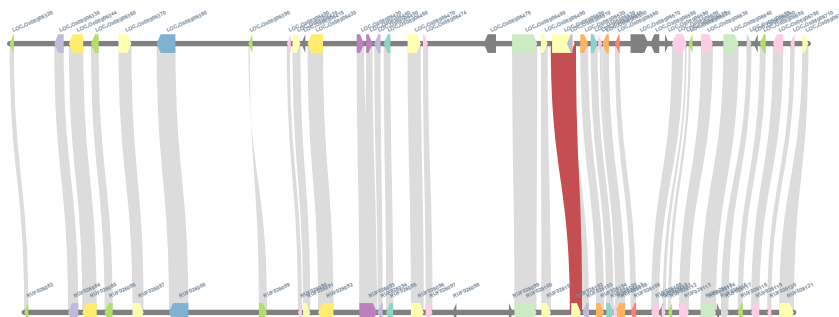

## Oru\_Chr8

4.25-4.52Mb

## LOC\_Os08g09270 RUF026277

**Osa\_Chr8**  
5.26-5.49Mb

**Oru\_Chr8**  
5.85-6.12Mb

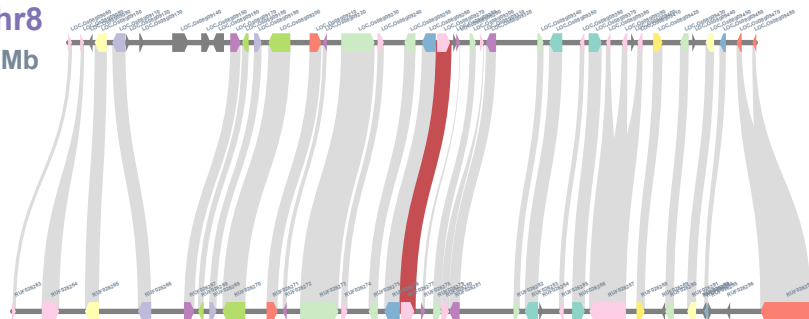

# LOC\_Os08g15090 RUF026566

Osa\_Chr8  
8.98-9.26Mb

Oru\_Chr8  
9.69-9.94Mb

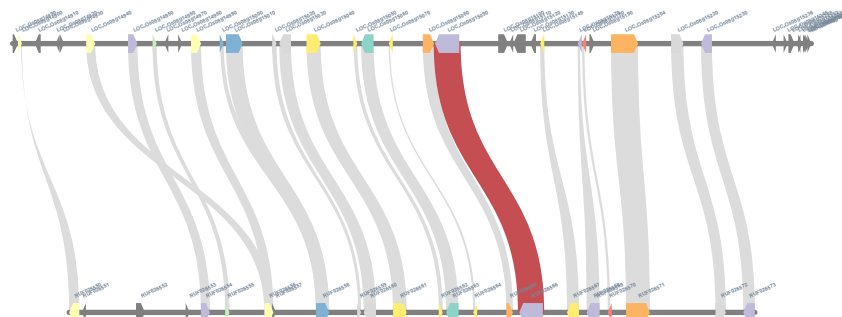

# LOC\_Os08g17080 RUF026651

Osa\_Chr8  
10.33-10.60Mb

Oru\_Chr8  
10.87-11.18Mb

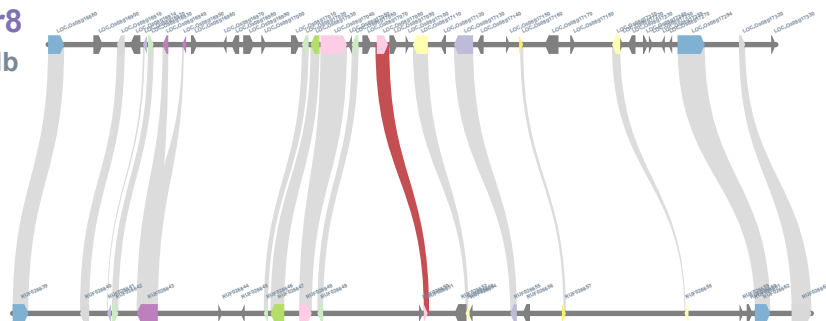

# LOC\_Os08g20610 RUF026749

Osa\_Chr8  
12.21-12.50Mb

Oru\_Chr8  
13.47-13.28Mb

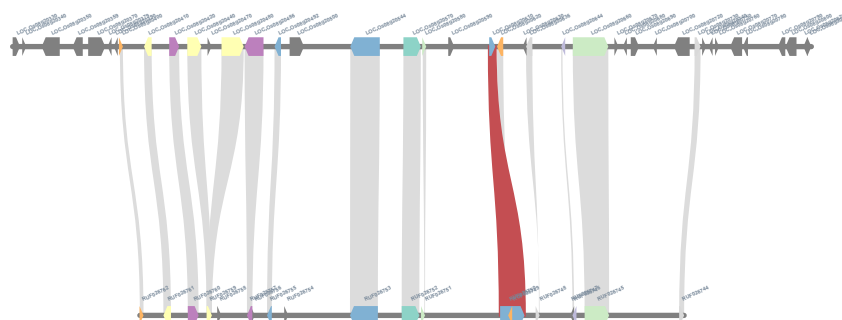

# LOC\_Os08g21561 RUF026790

Osa\_Chr8  
12.72-13.05Mb

Oru\_Chr8  
14.16-13.94Mb

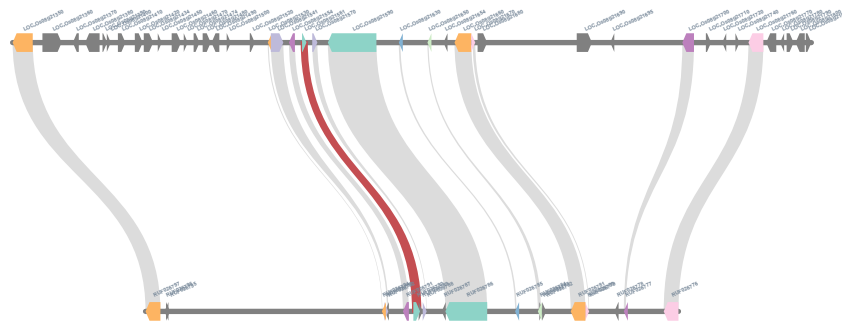



## LOC\_Os08g25280 RUF026936

**Osa\_Chr8**  
15.20-15.52Mb

**Oru\_Chr8**  
15.83-16.13Mb

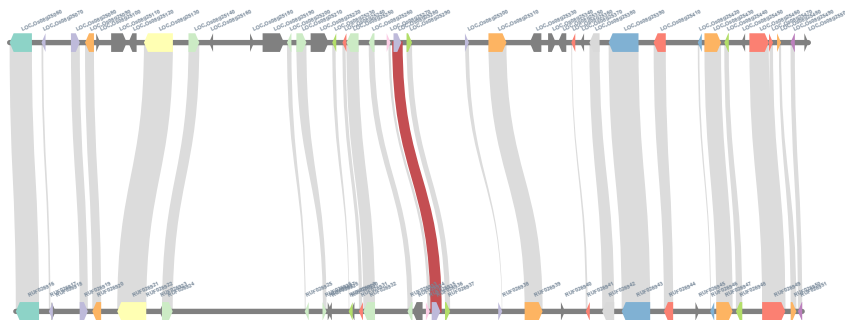

LOC\_Os08g28180 RUF027097

Osa\_Chr8  
17.05-17.32Mb

Oru\_Chr8  
18.08-18.53Mb

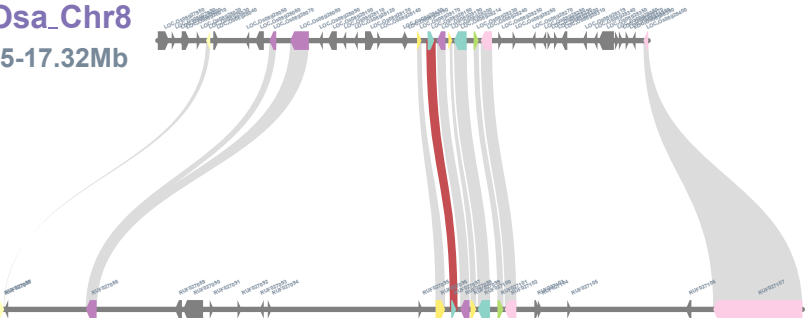

## LOC\_Os08g28830 RUF027124

**Osa\_Chr8**  
17.50-17.79Mb

**Oru\_Chr8**  
18.65-18.94Mb

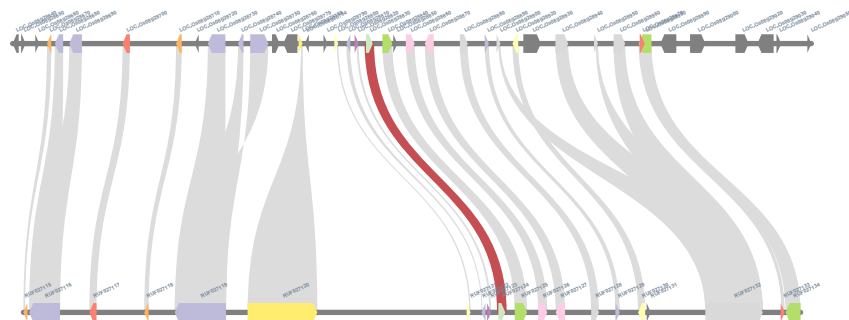

# LOC\_Os08g31110 RUF027240

Osa\_Chr8  
19.05-19.37Mb

Oru\_Chr8  
20.09-20.40Mb

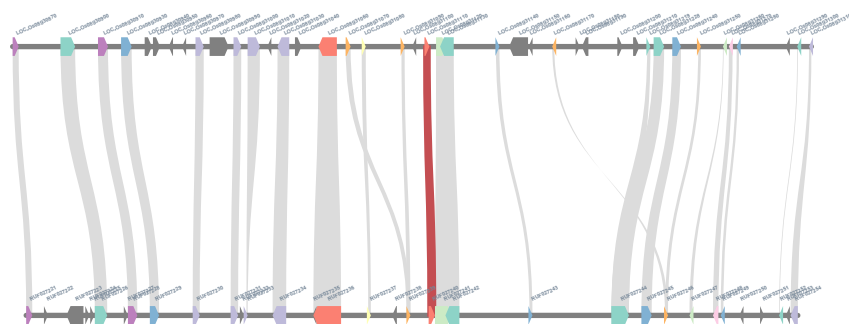

# LOC\_Os08g33700 RUF027415

Osa\_Chr8  
20.91-21.21Mb

Oru\_Chr8  
21.81-22.07Mb

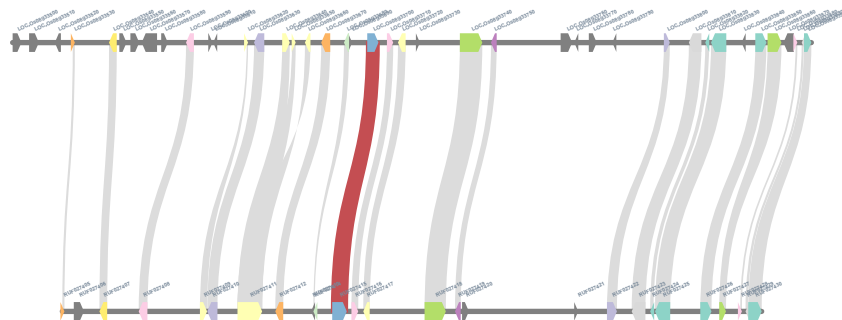

# LOC\_Os08g37520 RUF027703

Osa\_Chr8  
23.57-23.88Mb

Oru\_Chr8  
24.45-24.76Mb

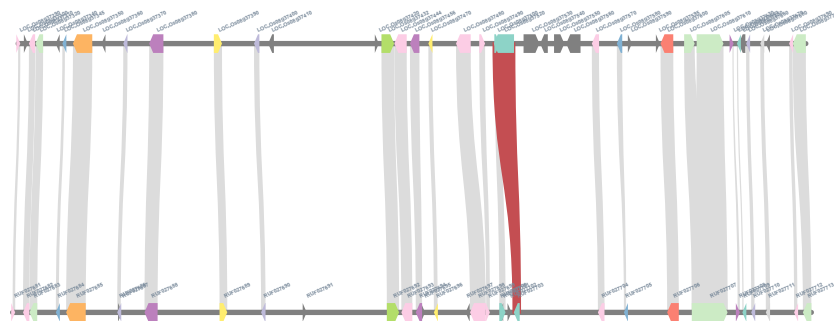

LOC\_Os08g38610 RUF027794

Osa\_Chr8  
24.31-24.54Mb

Oru\_Chr8  
25.19-25.42Mb

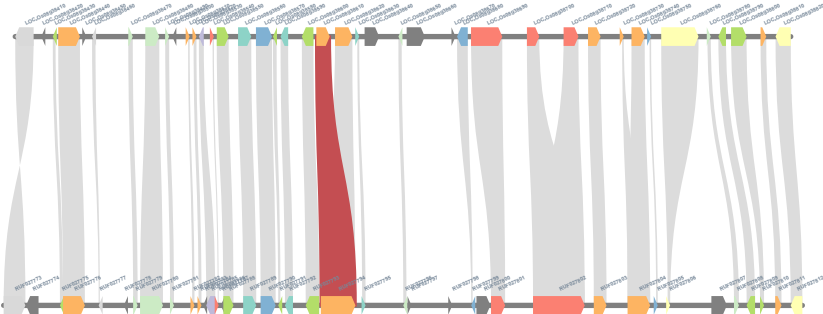

LOC\_Os08g39050 RUF027834

Osa\_Chr8  
24.55-24.81Mb

Oru\_Chr8  
25.44-25.69Mb

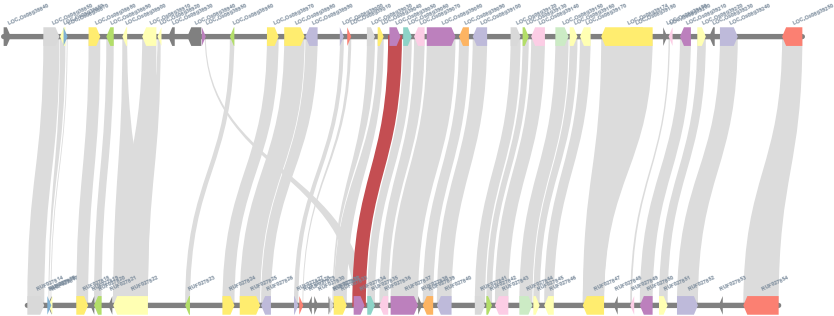



## LOC\_Os08g39130 RUF027842

**Osa\_Chr8**  
24.59-24.84Mb

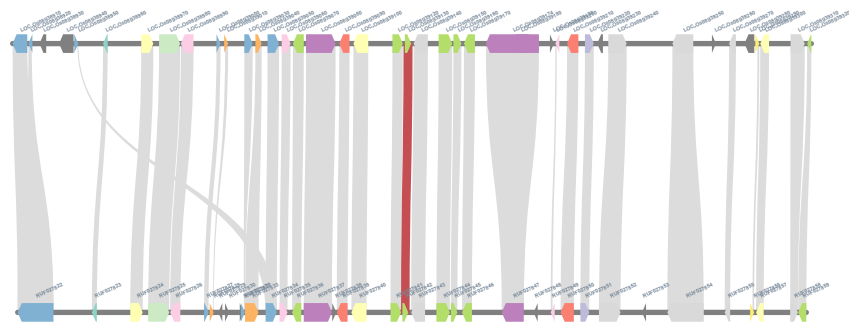

**Oru\_Chr8**  
25.47-25.72Mb

## LOC\_Os08g40020 RUF027911

**Osa\_Chr8**  
25.21-25.44Mb

**Oru\_Chr8**  
26.08-26.32Mb

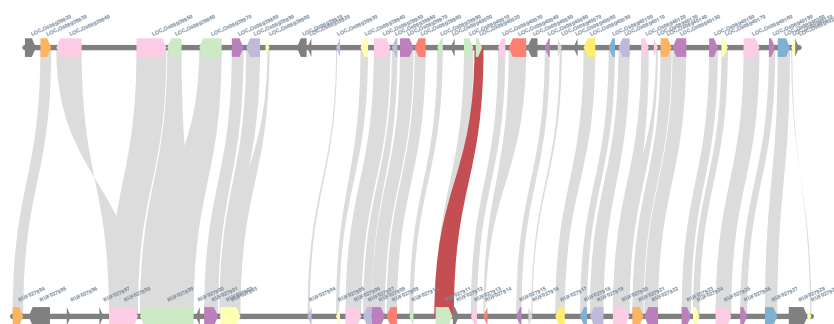

## LOC\_Os08g41380 RUF028025

**Osa\_Chr8**  
26.01-26.27Mb

**Oru\_Chr8**  
26.81-27.12Mb

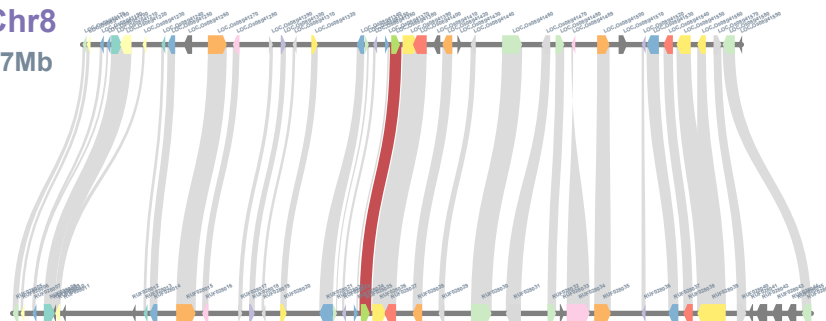

LOC\_Os08g42610 RUF028119

Osa\_Chr8  
26.78-27.08Mb

Oru\_Chr8  
27.51-27.80Mb

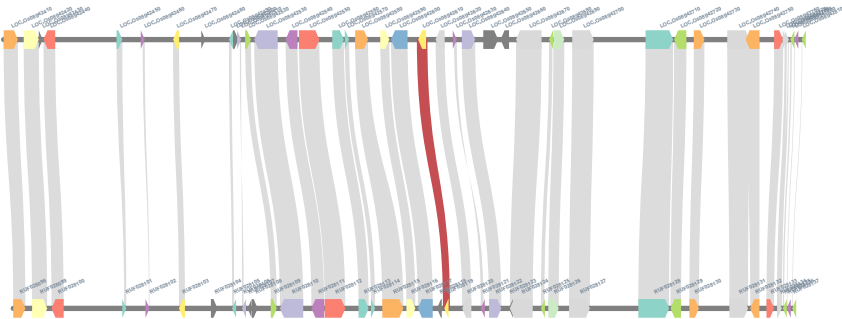

LOC\_Os09g02260 RUF028386

Osa\_Chr9  
0.75-1.03Mb

Oru\_Chr9  
0.60-0.85Mb

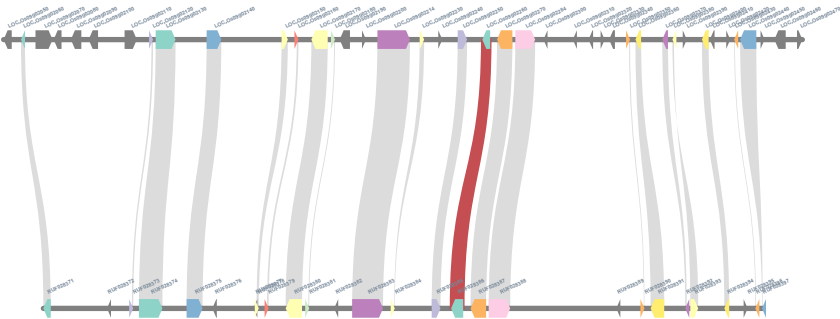

## LOC\_Os09g07780 RUF028549

Osa\_Chr9  
3.80-4.11Mb

Oru\_Chr9  
3.73-4.03Mb

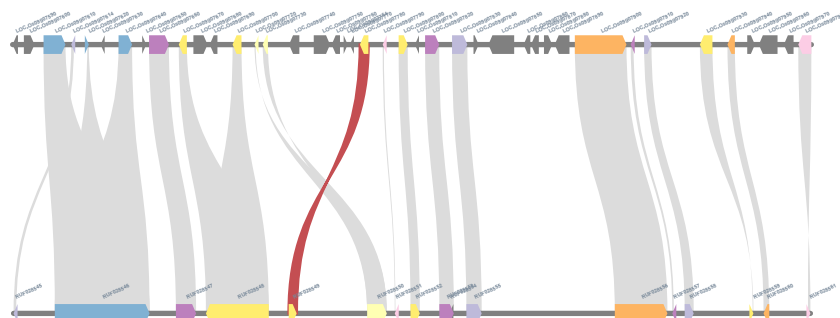

# LOC\_Os09g15800 RUF028908

Osa\_Chr9  
9.53-9.78Mb

Oru\_Chr9  
8.76-8.58Mb

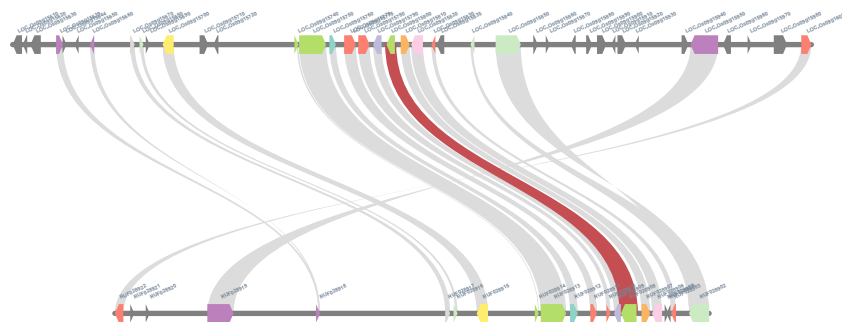

# LOC\_Os09g24240 RUF029323

Osa\_Chr9  
14.30-14.53Mb

Oru\_Chr9  
13.05-13.20Mb

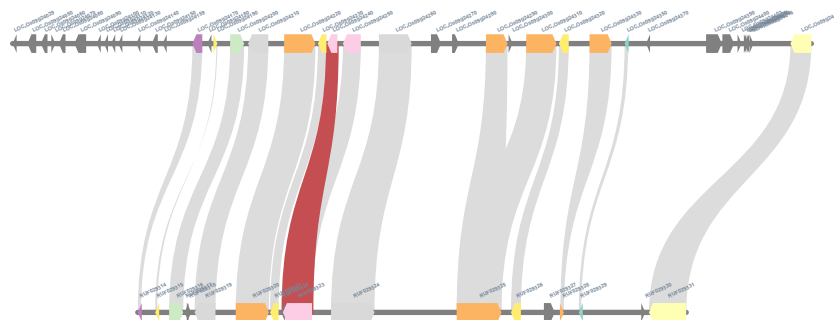



## LOC\_Os09g24520 RUF029340

**Osa\_Chr9**  
14.45-14.73Mb

**Oru\_Chr9**  
13.14-13.41Mb

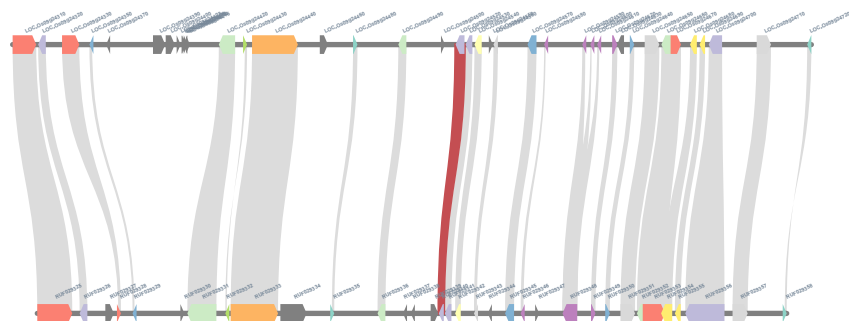

# LOC\_Os09g24640 RUF029350

Osa\_Chr9  
14.51-14.84Mb

Oru\_Chr9  
13.19-13.49Mb

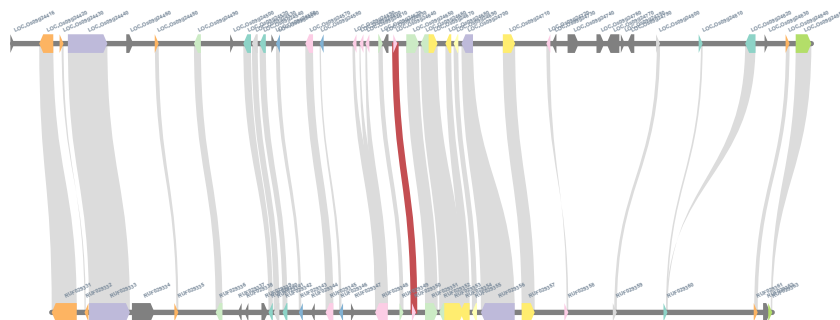

# LOC\_Os09g24680 RUF029354

Osa\_Chr9  
14.56-14.87Mb

Oru\_Chr9  
13.25-13.51Mb

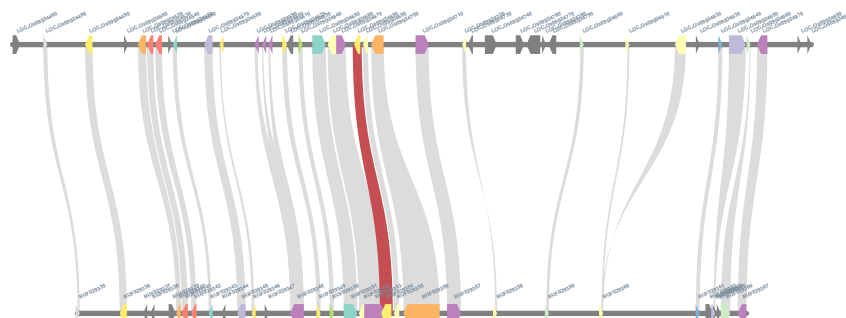

# LOC\_Os09g25050 RUF029384

Osa\_Chr9  
14.82-15.13Mb

Oru\_Chr9  
13.49-13.80Mb

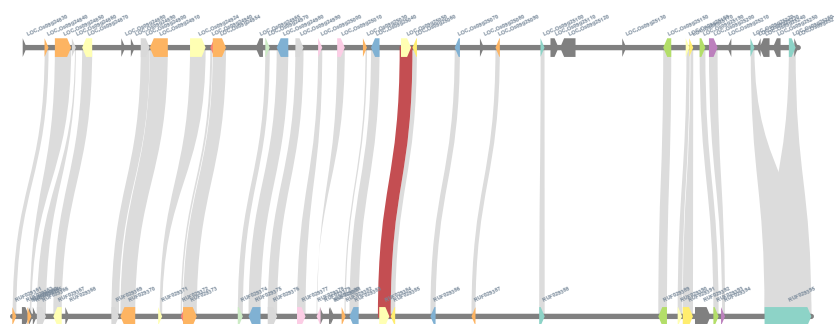

# LOC\_Os09g25550 RUF029413

Osa\_Chr9  
15.19-15.45Mb

Oru\_Chr9  
13.86-14.10Mb

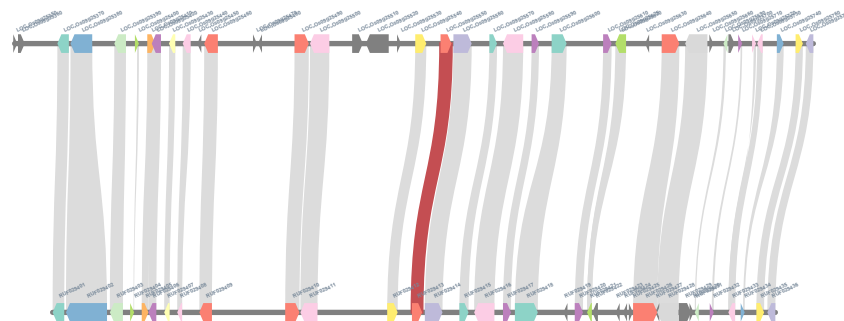

## LOC\_Os09g26190 RUF029470

Osa\_Chr9

15.61-15.94Mb

Oru\_Chr9

14.26-14.64Mb

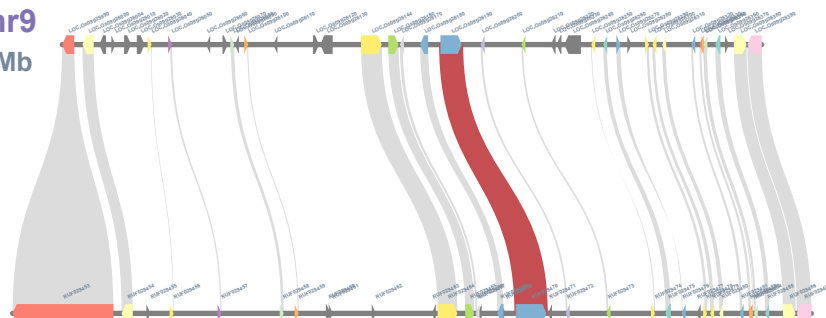

LOC\_Os09g29790 RUF029759

Osa\_Chr9  
17.98-18.25Mb

Oru\_Chr9  
16.72-16.97Mb

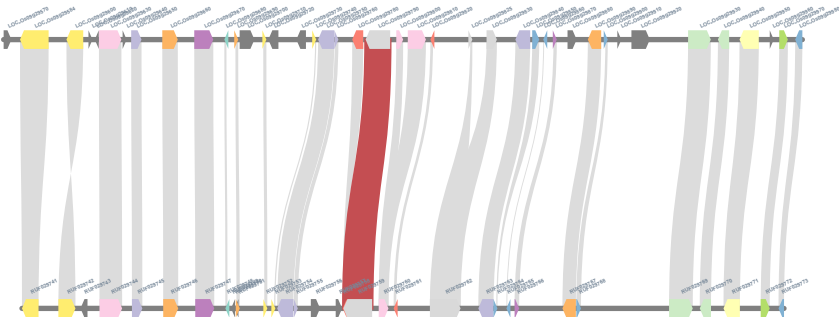

## LOC\_Os09g34870 RUF030031

**Osa\_Chr9**  
20.17-20.43Mb

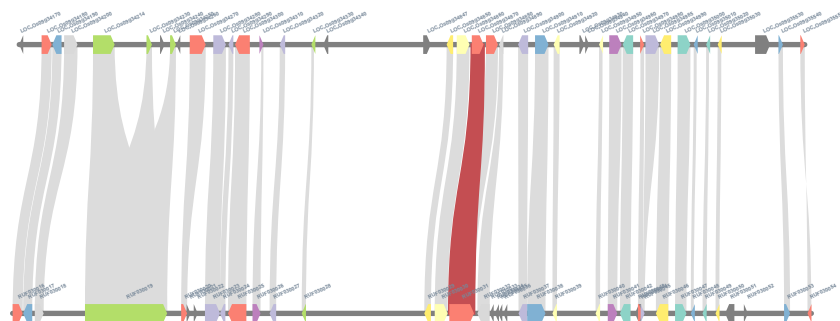

**Oru\_Chr9**  
18.93-19.20Mb



## LOC\_Os09g37070 RUF030179

Osa\_Chr9  
21.27-21.54Mb

Oru\_Chr9  
20.04-20.31Mb

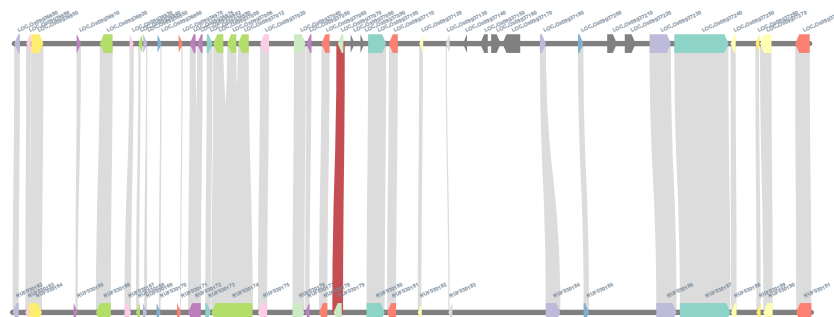

**LOC\_Os09g38310 RUF030281**

## Osa\_Chr9

**21.92-22.16Mb**

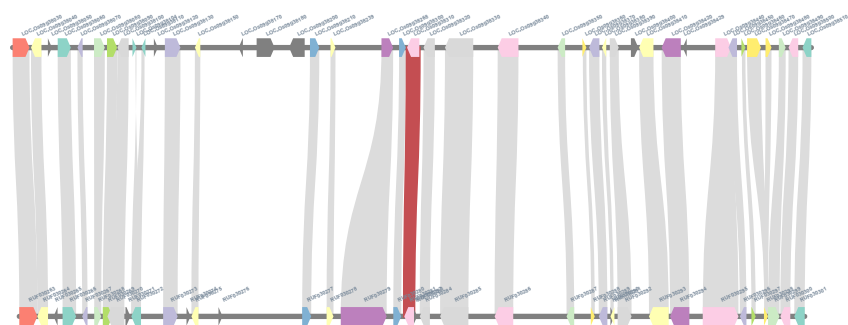

Oru\_Chr9

20.73-20.97Mb

LOC\_Os09g39970 RUF030412

Osa\_Chr9  
22.81-23.01Mb

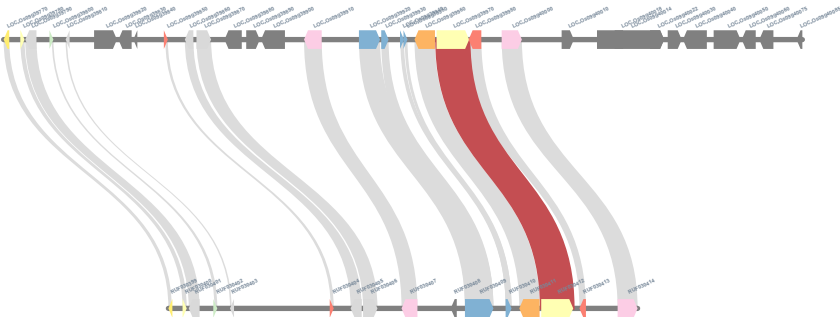

Oru\_Chr9  
21.59-21.71Mb

# LOC\_Os10g02650 RUF030501

Osa\_Chr10  
0.89-1.16Mb

Oru\_Chr10  
1.44-1.66Mb

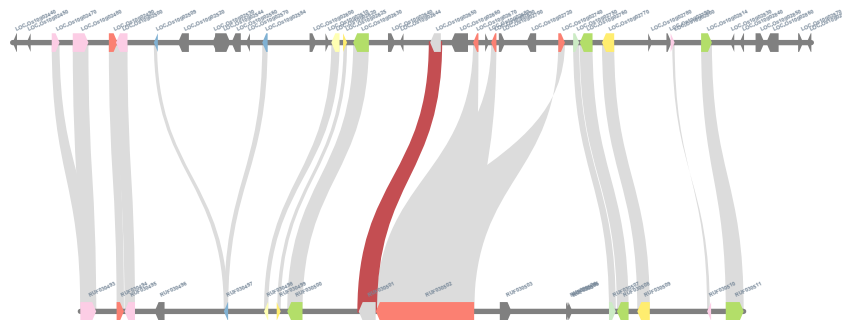

## LOC\_Os10g10170 RUF030929

Osa\_Chr10  
5.39-5.71Mb

Oru\_Chr10  
6.23-6.68Mb

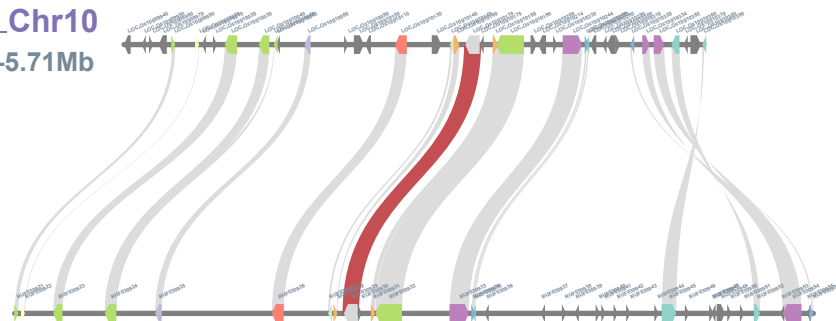

LOC\_Os10g21470 RUF031294

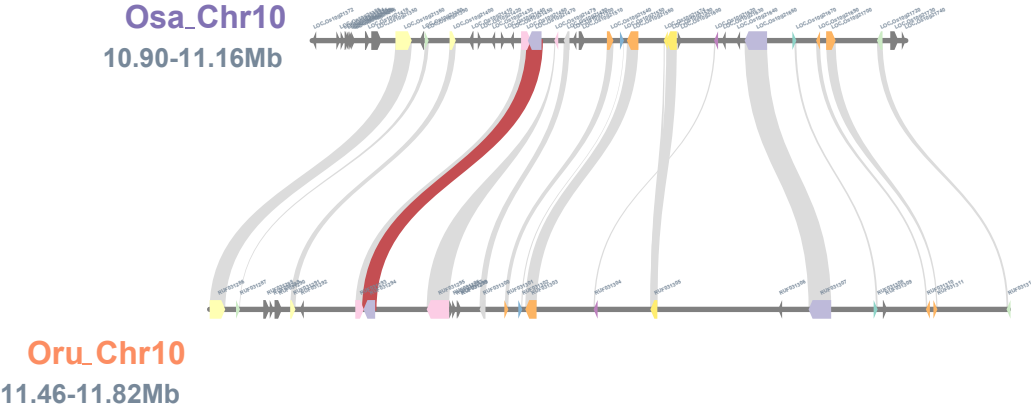

LOC\_Os10g21920 RUF031321

Osa\_Chr10  
11.12-11.42Mb

Oru\_Chr10  
11.79-12.05Mb

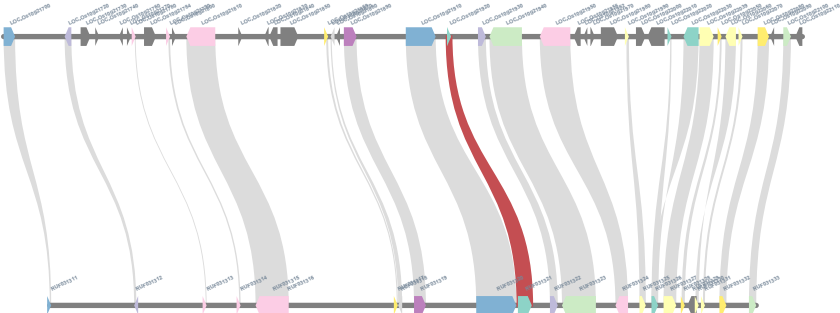

**LOC Os10g22370 RUF031351**

## Osa\_Chr10

## Oru\_Chr10

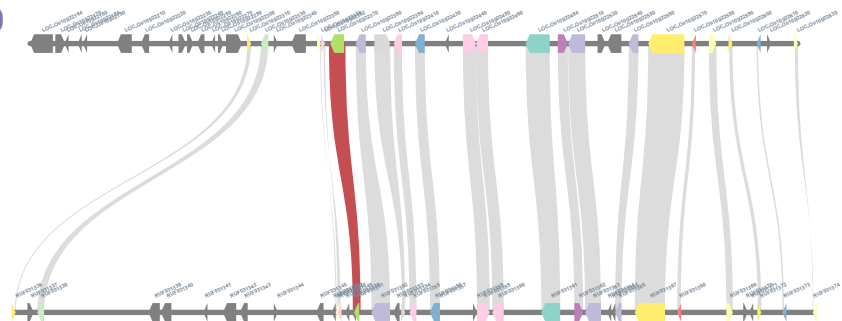



## LOC\_Os10g26070 RUF031528

**Osa\_Chr10**  
13.39-13.61Mb

**Oru\_Chr10**  
13.86-14.06Mb

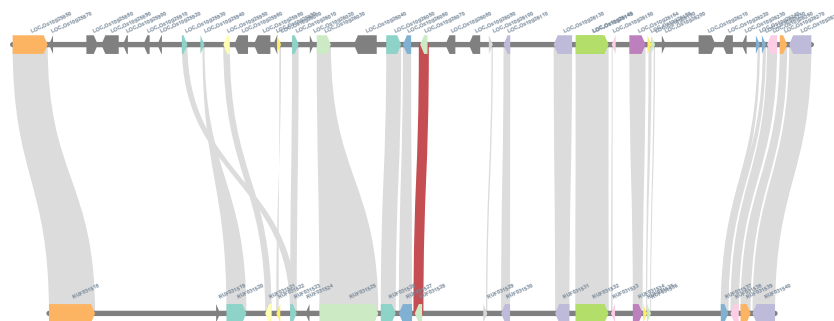

# LOC\_Os10g28600 RUF031674

Osa\_Chr10  
14.77-15.03Mb

Oru\_Chr10  
15.20-15.49Mb

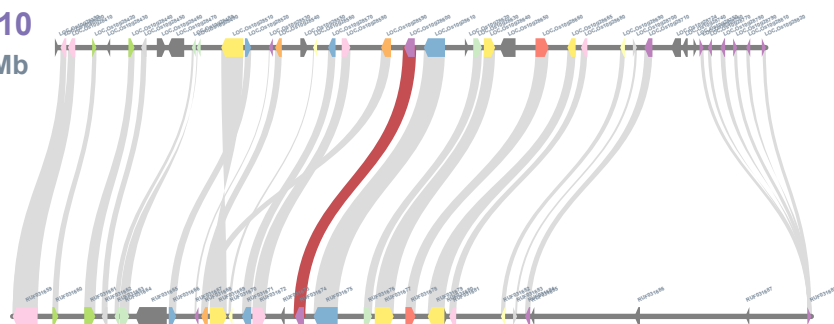

# LOC\_Os10g28640 RUF031677

Osa\_Chr10  
14.79-15.05Mb

Oru\_Chr10  
15.23-15.49Mb

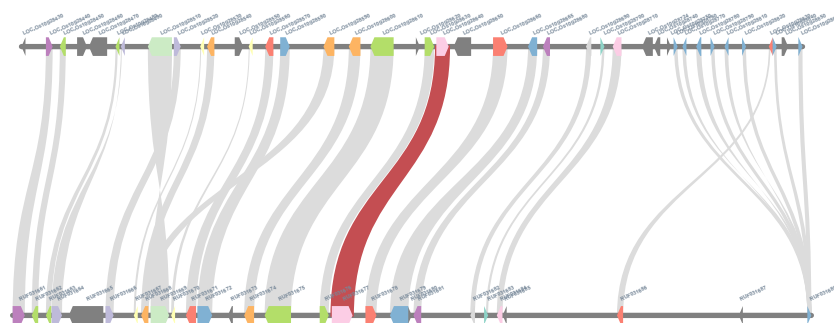

**LOC\_Os10g30760 RUF031772**

## Osa\_Chr10

15.87-16.17Mb

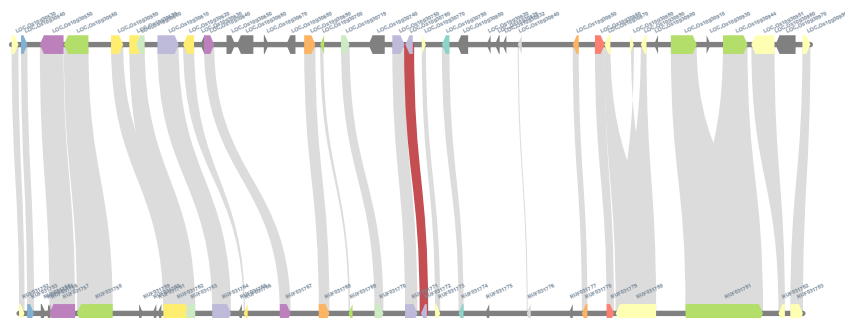

Oru\_Chr10

16.07-16.36Mb

**LOC\_Os10g33700 RUF031968**

**Osa\_Chr10**  
17.64-17.99Mb

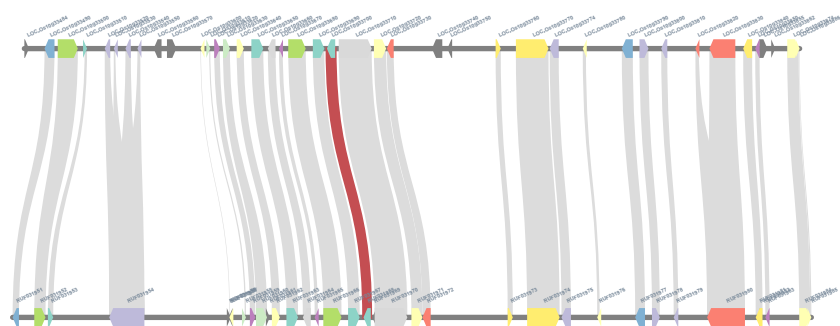

Oru\_Chr10  
17.89-18.24Mb

## LOC\_Os10g33730 RUF031972

**Osa\_Chr10**  
17.66-18.02Mb

**Oru\_Chr10**  
17.90-18.28Mb

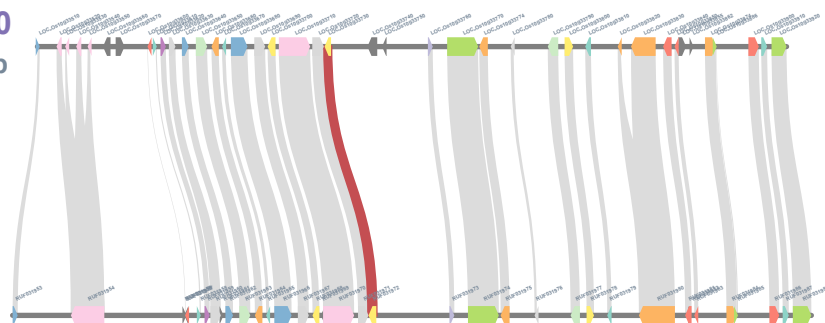

# LOC\_Os10g33874 RUF031984

Osa\_Chr10  
17.77-18.19Mb

Oru\_Chr10  
18.04-18.51Mb

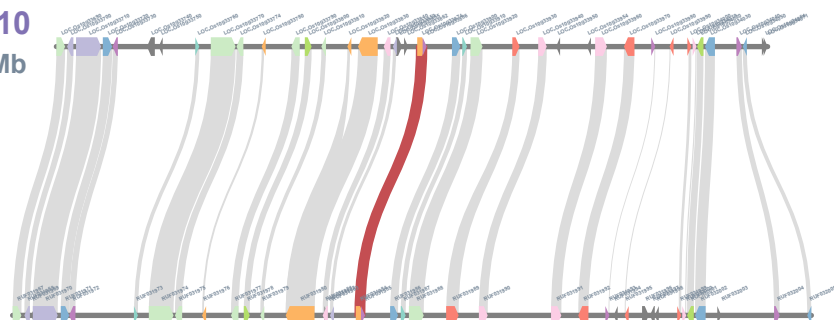

## LOC\_Os10g34310 RUF032021

**Osa\_Chr10**  
18.19-18.42Mb

**Oru\_Chr10**  
18.52-18.88Mb

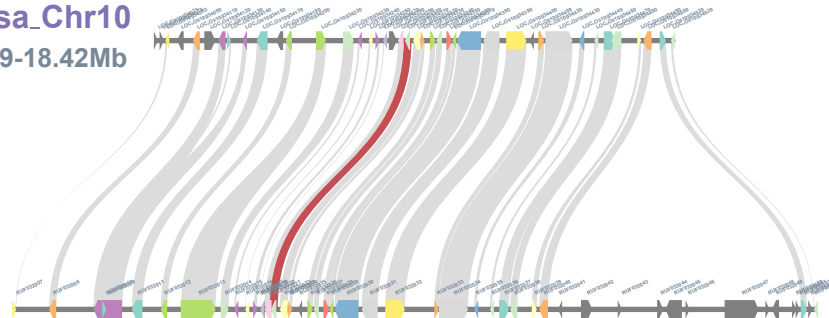



# LOC\_Os10g34370 RUF032029

Osa\_Chr10  
18.21-18.44Mb

Oru\_Chr10  
18.56-18.91Mb

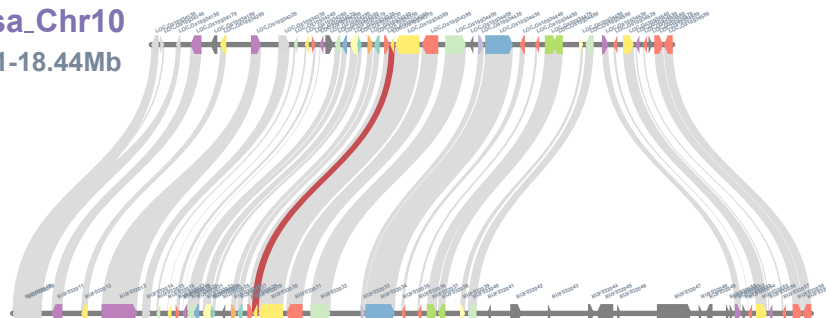

# LOC\_Os10g34720 RUF032067

Osa\_Chr10  
18.41-18.66Mb

Oru\_Chr10  
18.88-19.12Mb

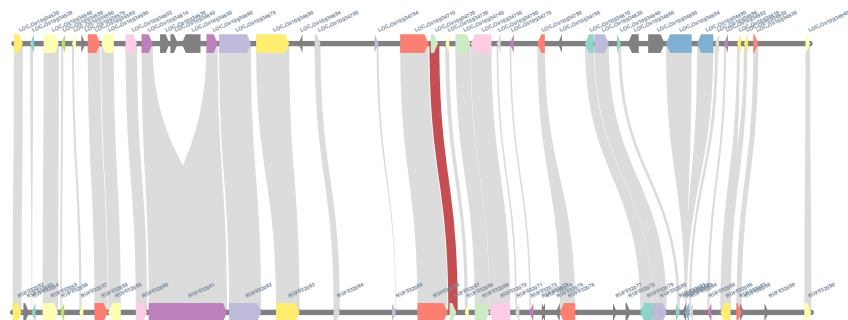

LOC\_Os10g35230 RUF032111

Osa\_Chr10  
18.69-18.93Mb

Oru\_Chr10  
19.16-19.39Mb

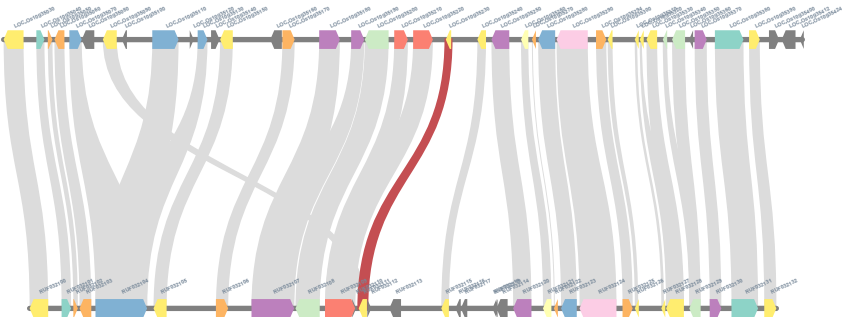

LOC\_Os10g35240 RUF032115

Osa\_Chr10  
18.70-18.94Mb

Oru\_Chr10  
19.17-19.41Mb

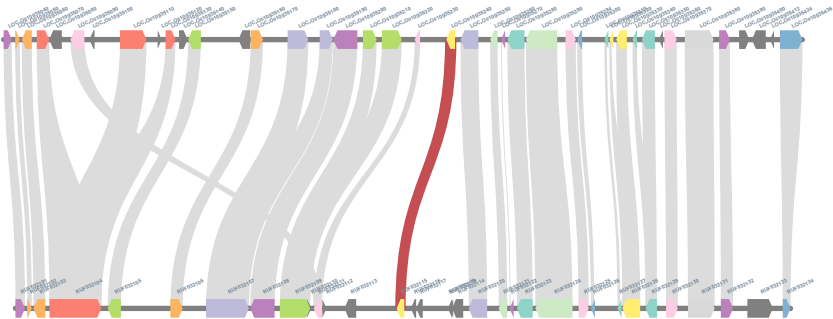

## LOC\_Os10g35260 RUF032121

**Osa\_Chr10**  
18.70-18.96Mb

**Oru\_Chr10**  
19.17-19.41Mb

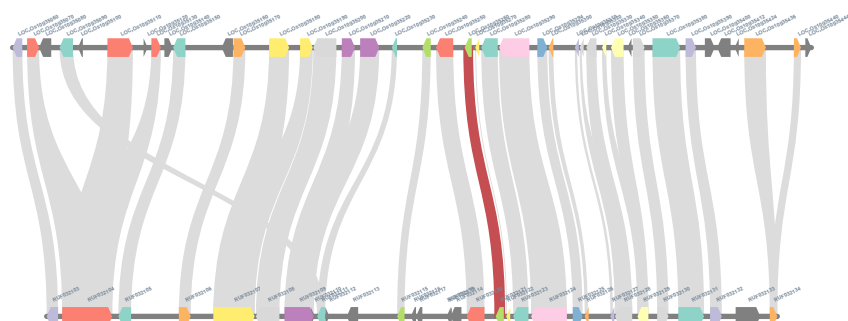

## LOC\_Os10g35436 RUF032134

**Osa\_Chr10**  
18.83-19.07Mb

**Oru\_Chr10**  
19.28-19.54Mb

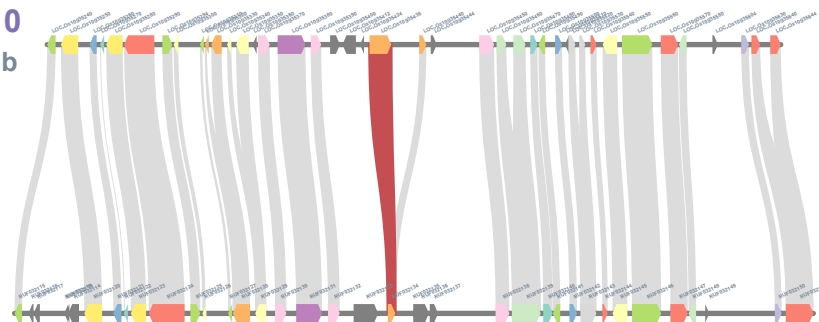

## LOC\_Os10g35436 RUF032134

**Osa\_Chr10**  
18.93-19.16Mb

**Oru\_Chr10**  
19.40-19.64Mb

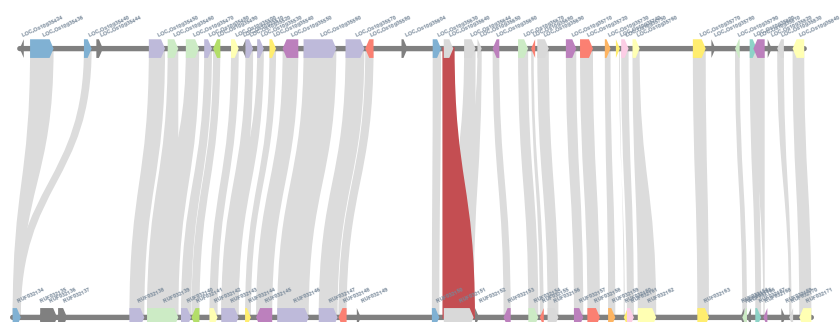

## LOC\_Os10g35730 RUF032159

**Osa\_Chr10**  
18.99-19.22Mb

**Oru\_Chr10**  
19.46-19.70Mb

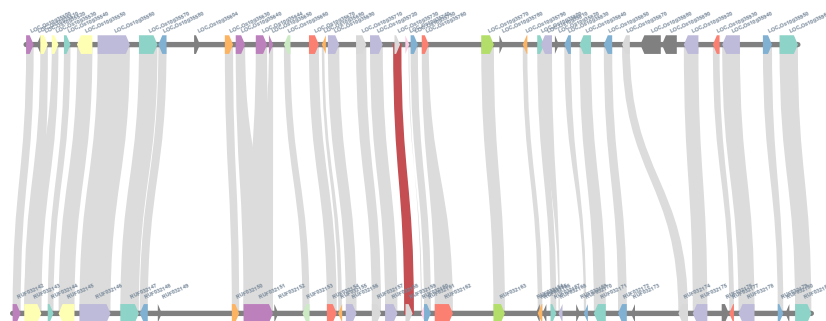



## LOC\_Os10g35750 RUF032161

Osa\_Chr10  
19.00-19.24Mb

Oru\_Chr10  
19.46-19.72Mb

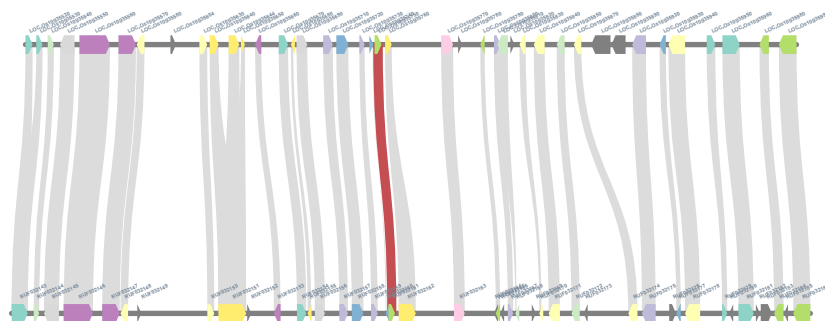

## LOC\_Os10g35760 RUF032162

Osa Chr10  
19.00–19.25Mb

Oru Chr10  
19.46–19.72Mb

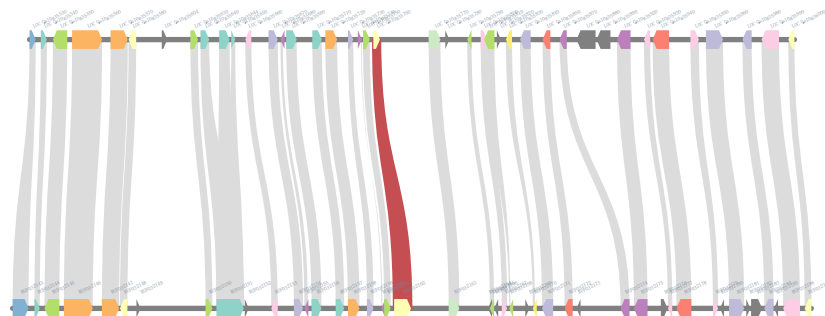

## LOC\_Os10g35790 RUF032165

**Osa\_Chr10**  
19.02-19.26Mb

**Ora\_Chr10**  
19.48-19.73Mb

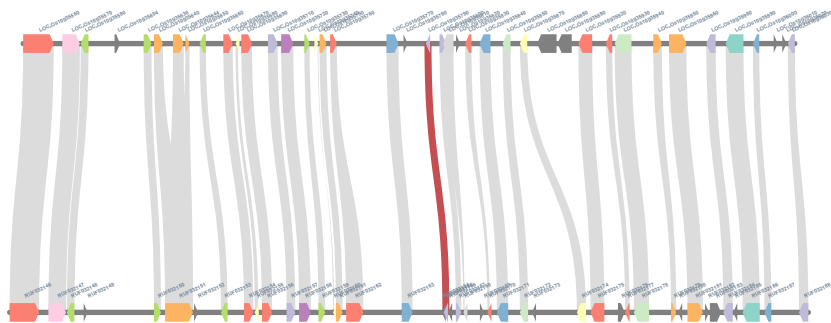

# LOC\_Os10g36190 RUF032198

Osa\_Chr10  
19.22-19.50Mb

Oru\_Chr10  
19.69-19.93Mb

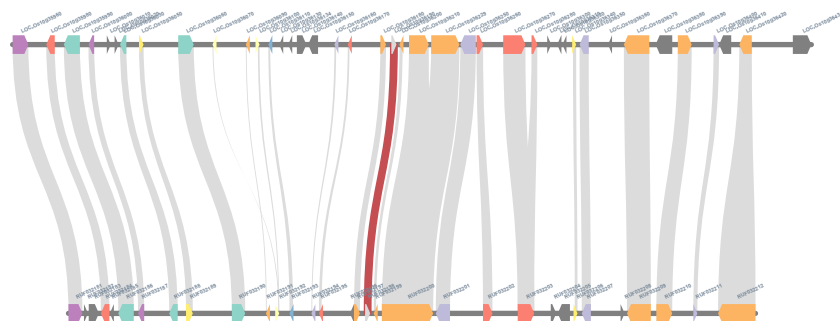

## LOC\_Os10g39460 RUF032417

**Osa\_Chr10**  
20.96-21.21Mb

**Oru\_Chr10**  
21.43-21.69Mb

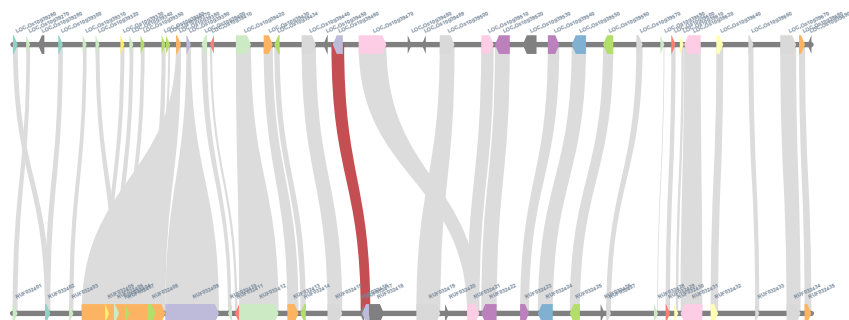

## LOC\_Os10g40920 RUF032533

**Osa\_Chr10**  
21.83-22.12Mb

**Oru\_Chr10**  
22.31-22.59Mb

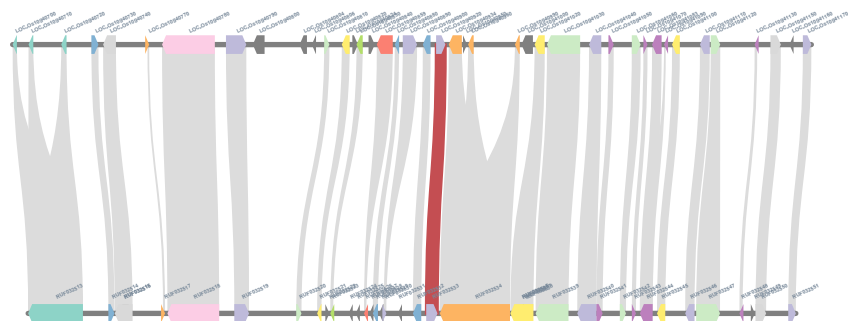

**LOC\_Os10g41740 RUF032598**

Osa\_Chr10  
22.30-22.57Mb

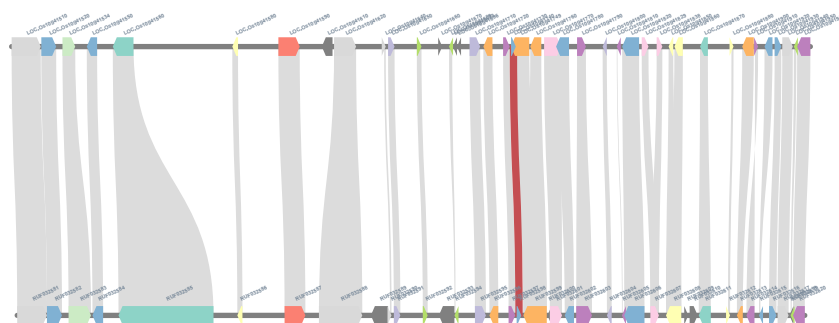

Oru\_Chr10  
22.77-23.03Mb

## LOC\_Os10g42760 RUF032681

**Osa\_Chr10**  
22.95-23.16Mb

**Oru\_Chr10**  
23.35-23.56Mb

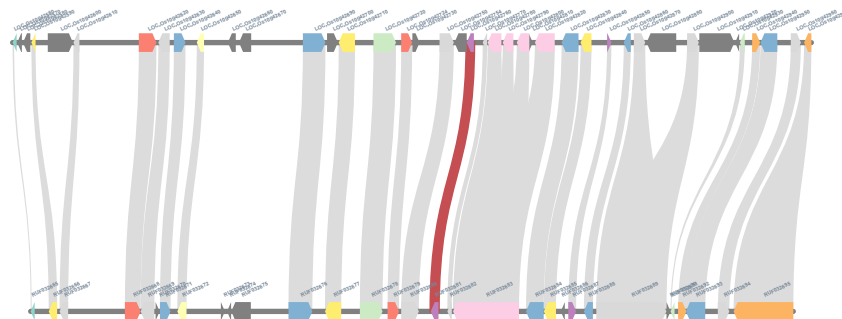



**LOC\_Os11g03690 RUF032847**

**Osa\_Chr11**  
**1.34-1.55Mb**

Oru\_Chr11  
1.27-1.52Mb

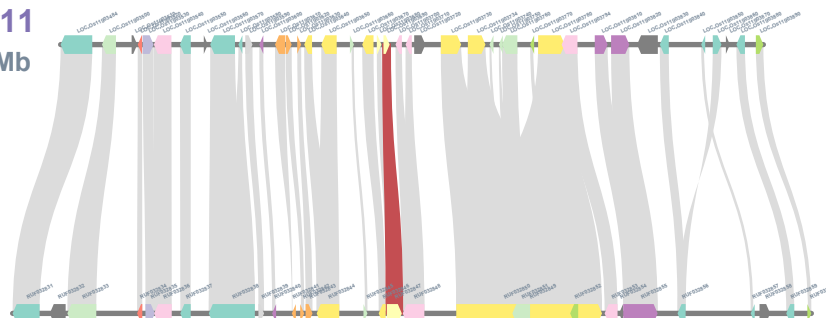

**LOC\_Os11g04295 RUF032883**

**Osa\_Chr11**  
**1.67-1.89Mb**

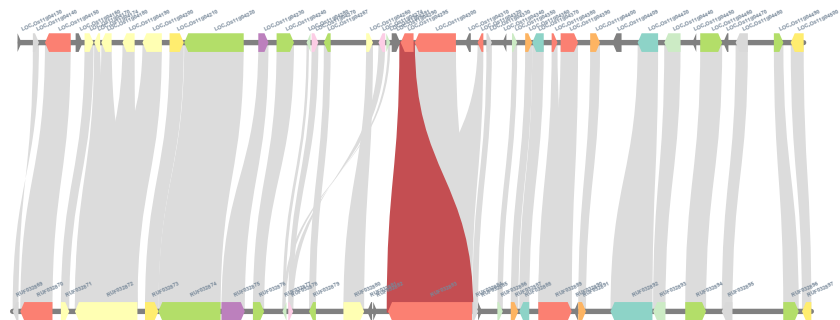

Oru\_Chr11  
1.62-1.84Mb

# LOC\_Os11g10740 RUF033344

Osa\_Chr11  
5.74-6.04Mb

Oru\_Chr11  
5.33-5.90Mb

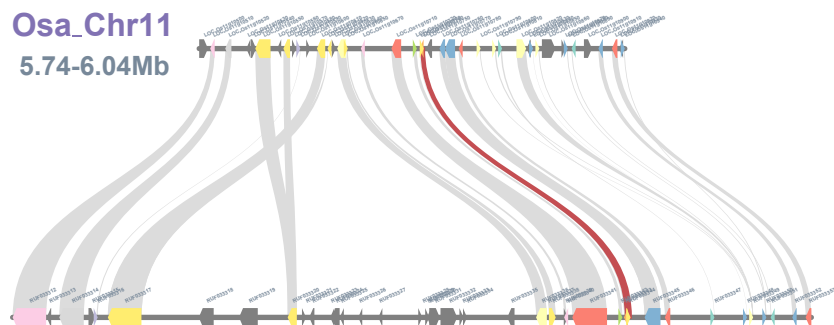

# LOC\_Os11g14980 RUF033553

Osa\_Chr11  
8.32-8.57Mb

Oru\_Chr11  
7.82-8.04Mb

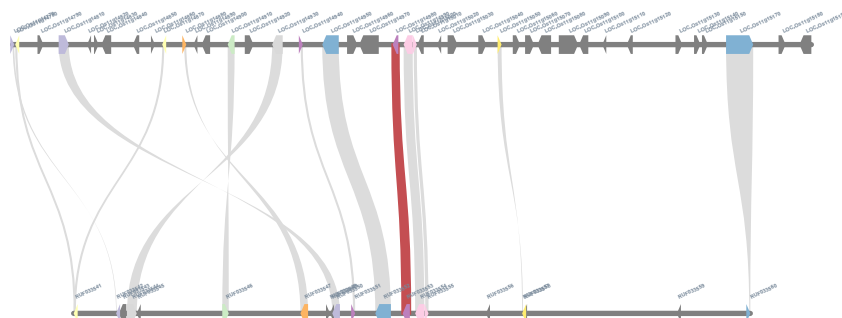

**LOC\_Os11g24530 RUF033804**

Osa\_Chr11  
13.83-14.11Mb

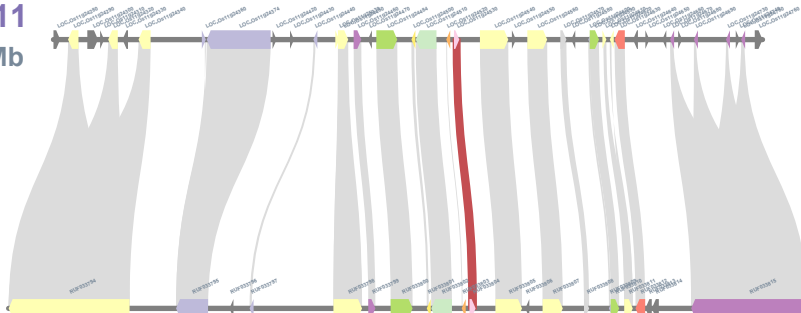

Oru\_Chr11  
12.73-13.04Mb

**LOC\_Os11g24570 RUF033808**

**Osa\_Chr11**  
**13.85-14.14Mb**

Oru\_Chr11  
12.73-13.05Mb

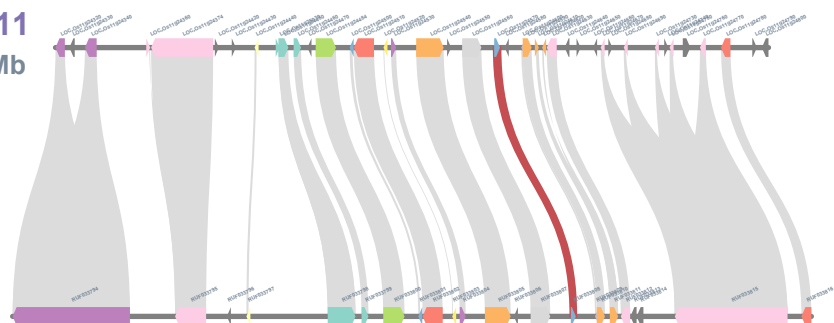

# LOC\_Os11g37330 RUF034583

Osa\_Chr11  
21.91-22.17Mb

Oru\_Chr11  
21.84-22.04Mb

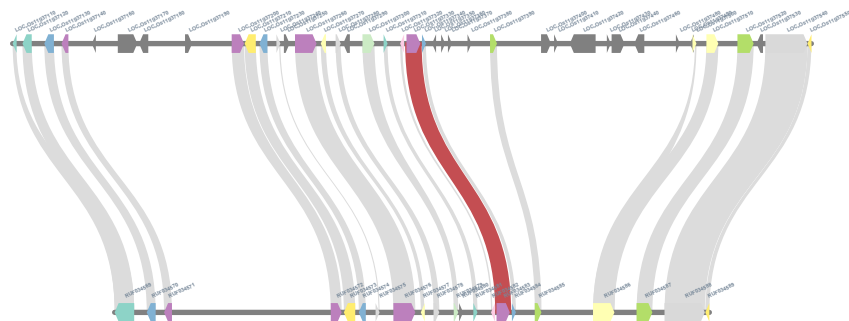

LOC\_Os11g37660 RUF034594

Osa\_Chr11  
22.11-22.42Mb

Oru\_Chr11  
22.00-22.26Mb

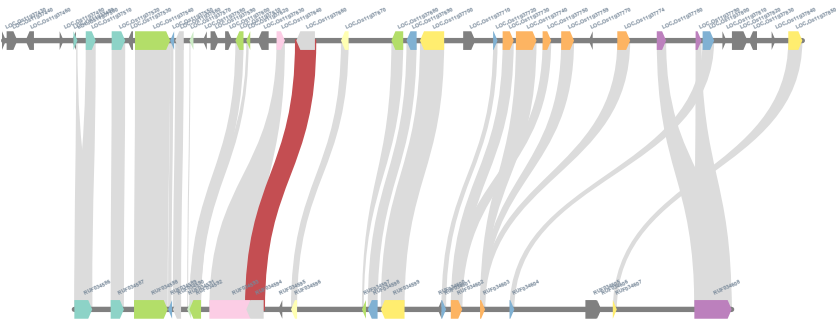



LOC\_Os11g39360 RUF034717

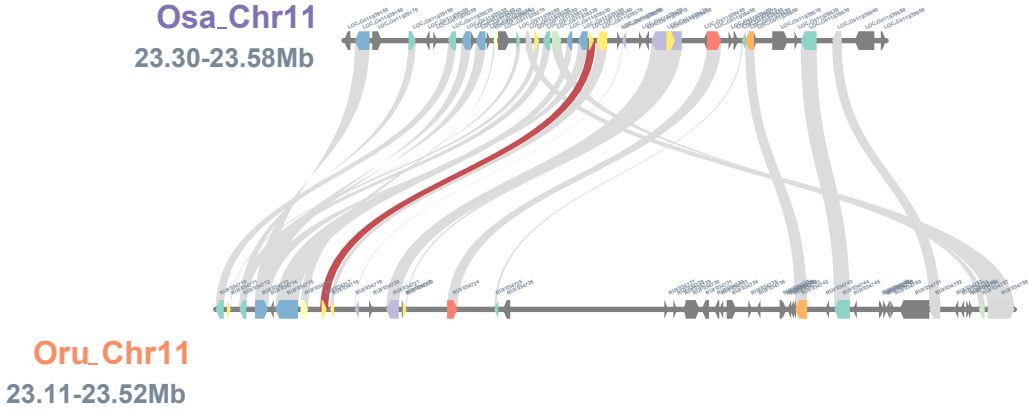

# LOC\_Os11g44930 RUF035139

Osa\_Chr11  
27.06-27.33Mb

Oru\_Chr11  
27.48-27.31Mb

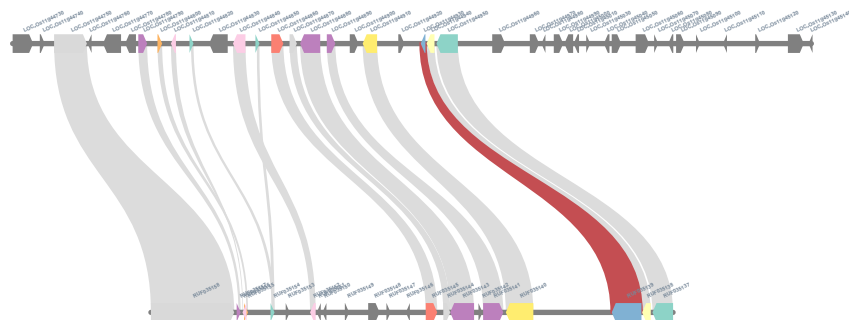

LOC\_Os12g01210 RUF035397

Osa\_Chr12  
0.00-0.26Mb

Oru\_Chr12  
0.45-0.92Mb

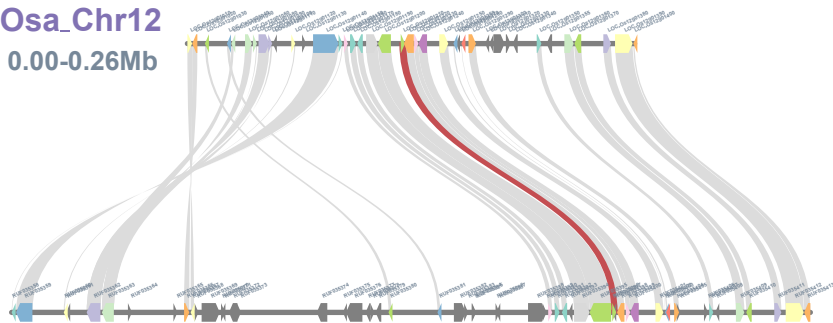

LOC\_Os12g01910 RUF035442

Osa\_Chr12  
0.42-0.63Mb

Oru\_Chr12  
1.08-1.26Mb

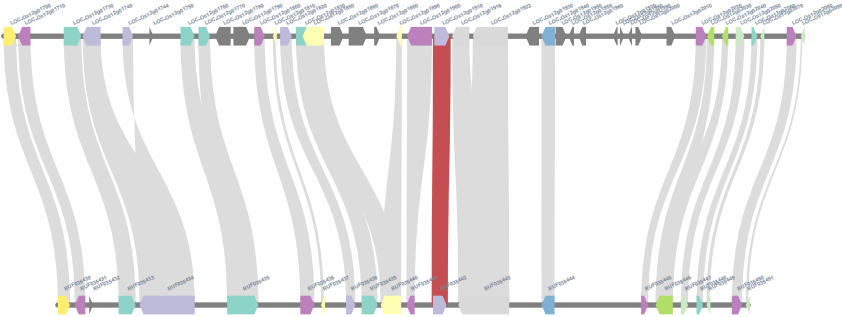

**LOC\_Os12g02280 RUF035463**

## Osa\_Chr12

0.62-0.85Mb

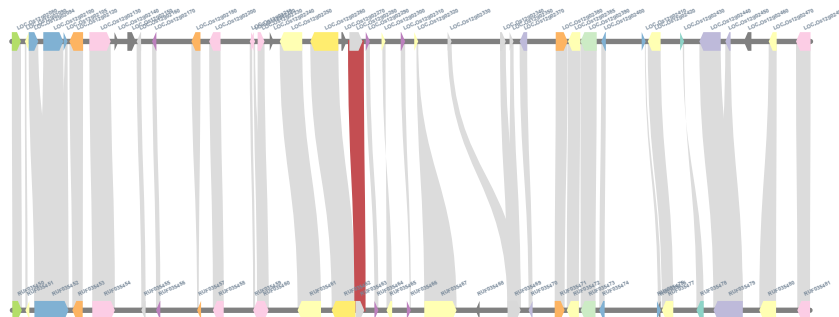

Oru\_Chr12

1.25-1.48Mb

## LOC\_Os12g03450 RUF035549

**Osa\_Chr12**  
1.24-1.49Mb

**Oru\_Chr12**  
1.89-2.19Mb

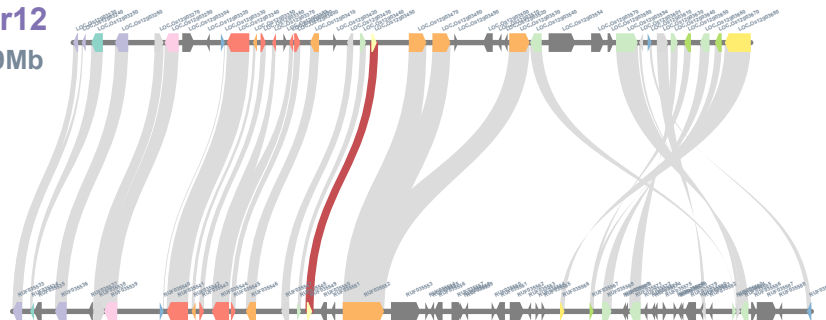

## LOC\_Os12g05640 RUF035737

**Osa\_Chr12**

2.46-2.69Mb

**Oru\_Chr12**

3.02-3.27Mb

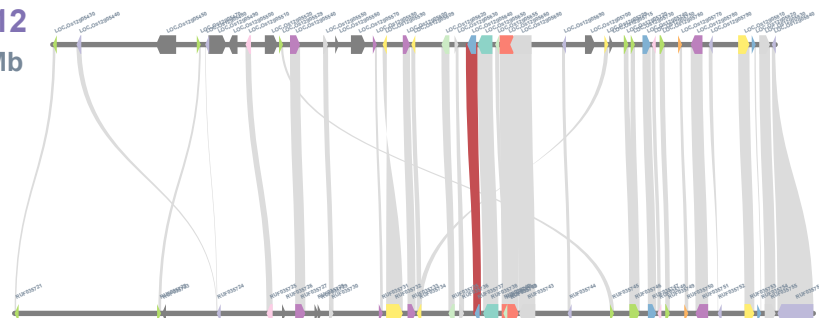

**LOC\_Os12g06070 RUF035773**

## Osa\_Chr12

## 2.69-2.99Mb

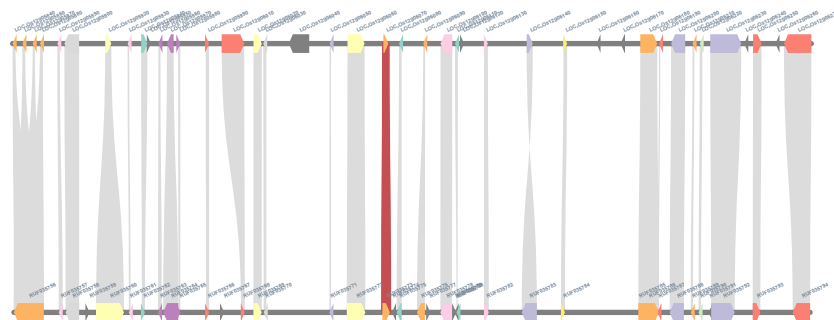

Oru\_Chr12

**3.26-3.56Mb**



**LOC\_Os12g06650 RUF035821**

**Osa\_Chr12**  
3.09-3.33Mb

Oru\_Chr12  
3.66-3.92Mb

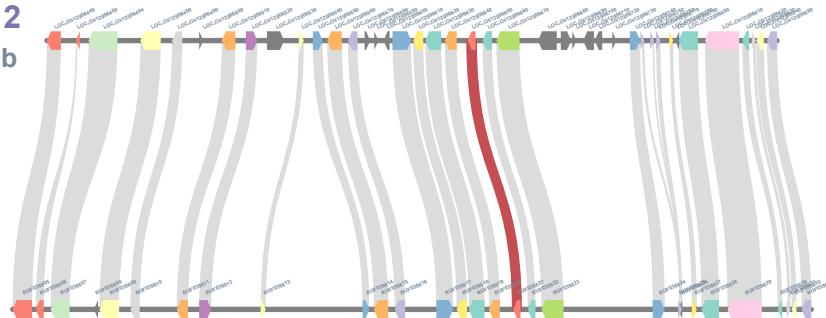

## LOC\_Os12g07260 RUF035863

**Osa\_Chr12**  
3.44-3.71Mb

**Oru\_Chr12**  
4.04-4.32Mb

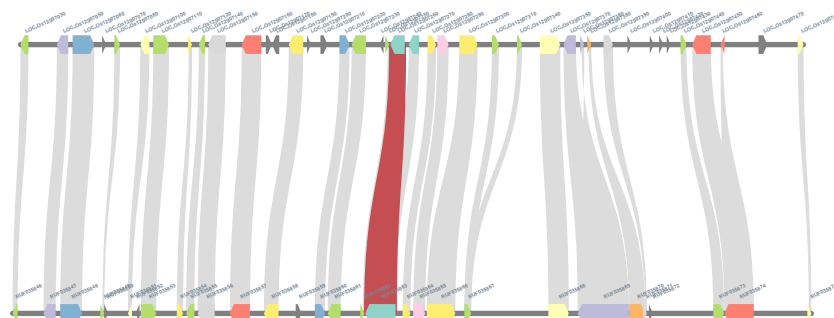

LOC\_Os12g08140 RUF035917

Osa\_Chr12  
4.03-4.25Mb

Oru\_Chr12  
4.62-4.79Mb

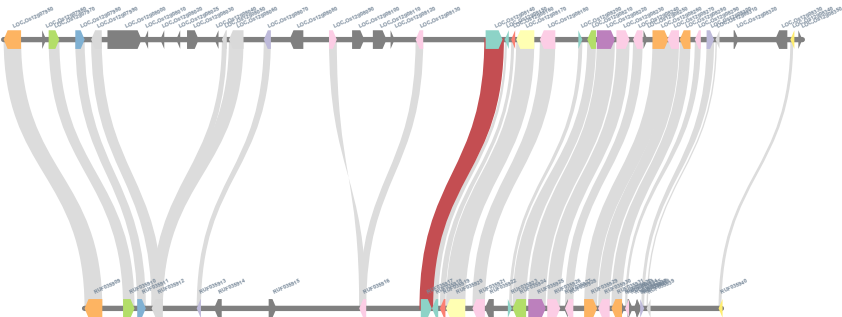

LOC\_Os12g13110 RUF036086

Osa\_Chr12  
7.13-7.41Mb

Oru\_Chr12  
6.36-6.62Mb

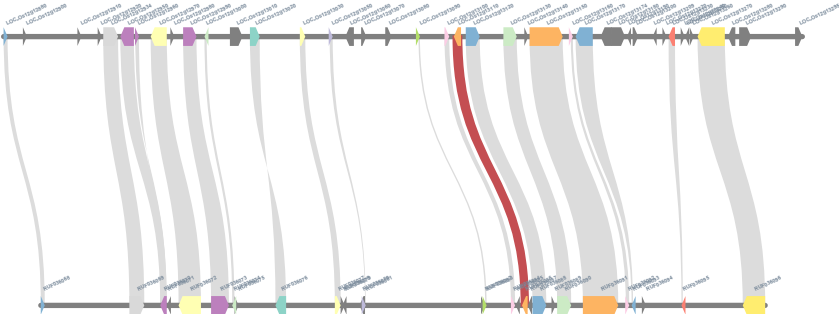

## LOC\_Os12g15460 RUF036173

**Osa\_Chr12**  
8.66-8.94Mb

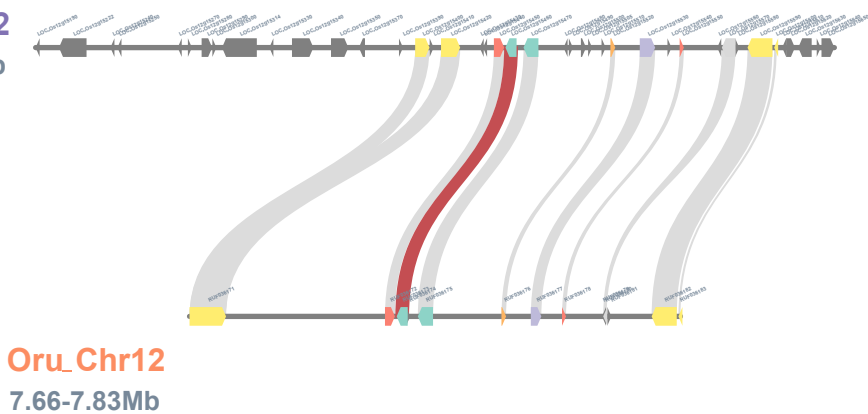

# LOC\_Os12g17080 RUF036231

Osa\_Chr12  
9.67-9.89Mb

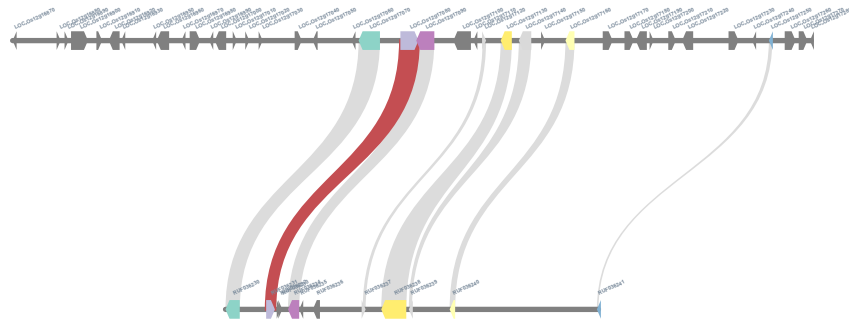

Oru\_Chr12  
8.70-8.80Mb

## LOC\_Os12g18640 RUF036324

**Osa\_Chr12**  
10.64-10.94Mb

**Oru\_Chr12**  
9.46-9.77Mb

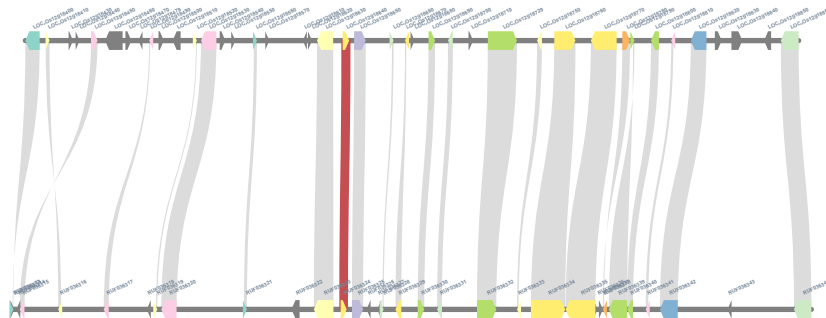

## LOC\_Os12g19260 RUF036357

Osa\_Chr12  
11.03-11.36Mb

Oru\_Chr12  
9.91-10.20Mb

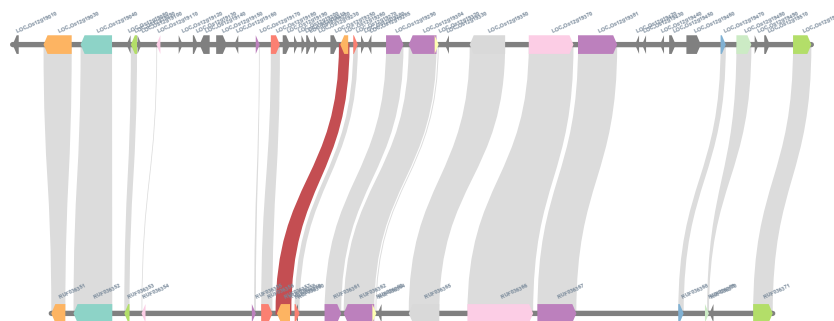



LOC\_Os12g27060 RUF036568

Osa\_Chr12  
15.75-16.01Mb

Oru\_Chr12  
13.69-14.24Mb

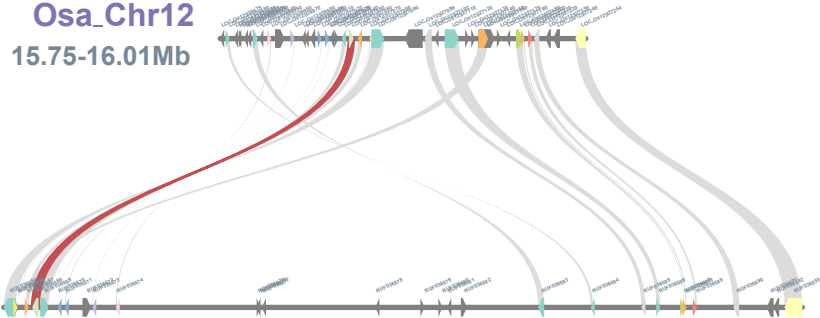

LOC\_Os12g30620 RUF036716

Osa\_Chr12  
18.25-18.53Mb

Oru\_Chr12  
15.76-15.94Mb

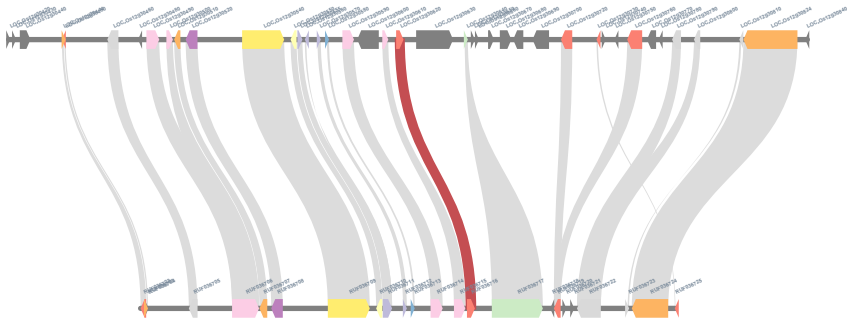

## LOC\_Os12g34340 RUF037004

**Osa\_Chr12**  
20.70-20.93Mb

**Oru\_Chr12**  
18.69-18.51Mb

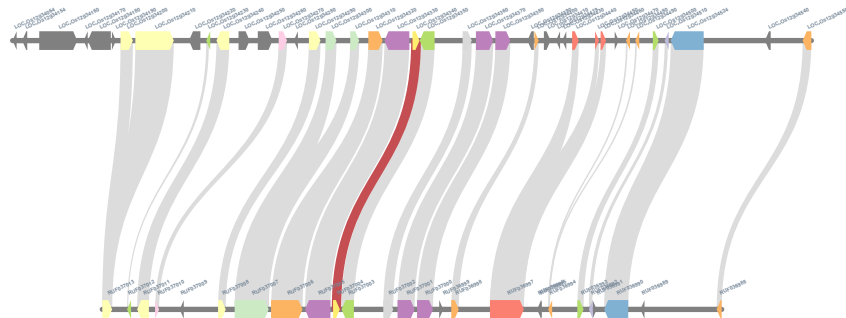

LOC\_Os12g36620 RUF036859

Osa\_Chr12  
22.29-22.58Mb

Oru\_Chr12  
17.05-19.04Mb

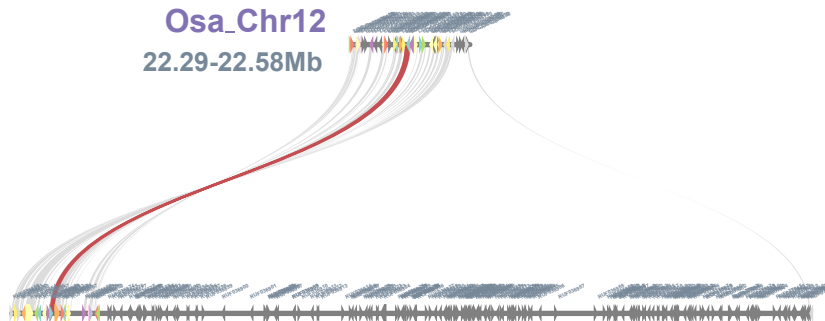

LOC\_Os12g37100 RUF037041

Osa\_Chr12  
22.62-22.90Mb

Oru\_Chr12  
18.78-19.09Mb

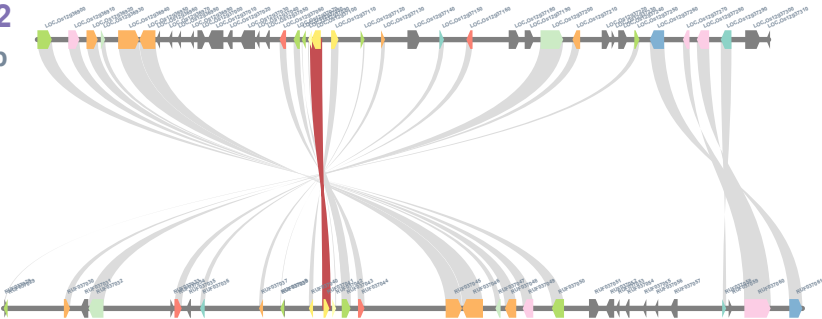

**LOC\_Os12g38880 RUF037179**

**Osa\_Chr12**  
23.76-24.05Mb

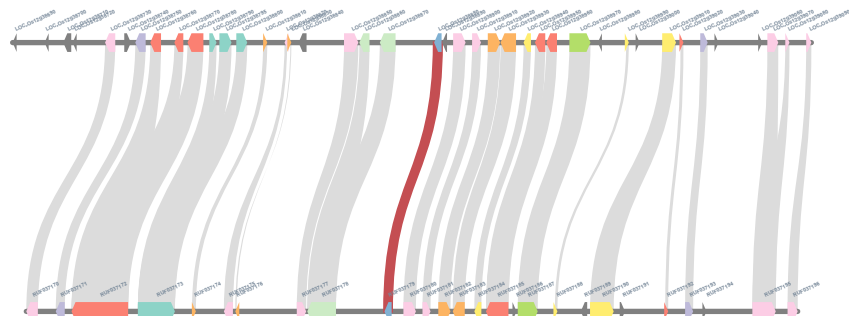

Oru\_Chr12  
19.83-20.11Mb

## LOC\_Os12g44170 RUF037528

**Osa\_Chr12**  
27.29-27.51Mb

**Oru\_Chr12**  
22.81-23.06Mb

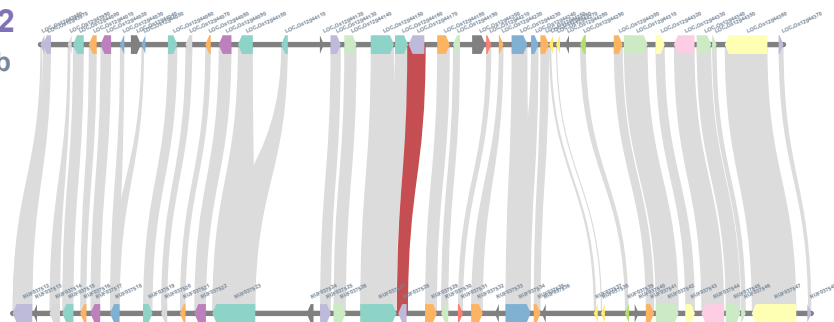

Supplement: s1 [file s1]
