# Supplementary material for: Comparative Genomic Analysis of Asian Cultivated Rice and Its Wild Progenitor (Oryza rufipogon) Has Revealed Evolutionary Innovation of the Pentatricopeptide Repeat Gene Family through Gene Duplication
Source: Int J Mol Sci. 2023 Nov 14;24(22):16313. doi: 10.3390/ijms242216313 (PMC10671101; doi:10.3390/ijms242216313)

|                   |
|-------------------|
| Osa_root_rep1     |
| Osa_root_rep2     |
| Osa_root_rep3     |
| Osa_leave_rep1    |
| Osa_leave_rep2    |
| Osa_leave_rep3    |
| Osa_seedling_rep1 |
| Osa_seedling_rep2 |
| Osa_seedling_rep3 |
| Osa_panicke_rep1  |
| Osa_panicke_rep2  |
| Osa_panicke_rep3  |
| Oru_root_rep1     |
| Oru_root_rep2     |
| Oru_root_rep3     |
| Oru_leave_rep1    |
| Oru_leave_rep2    |
| Oru_leave_rep3    |
| Oru_seedling_rep1 |
| Oru_seedling_rep2 |
| Oru_seedling_rep3 |
| Oru_panicke_rep1  |
| Oru_panicke_rep2  |
| Oru_panicke_rep3  |

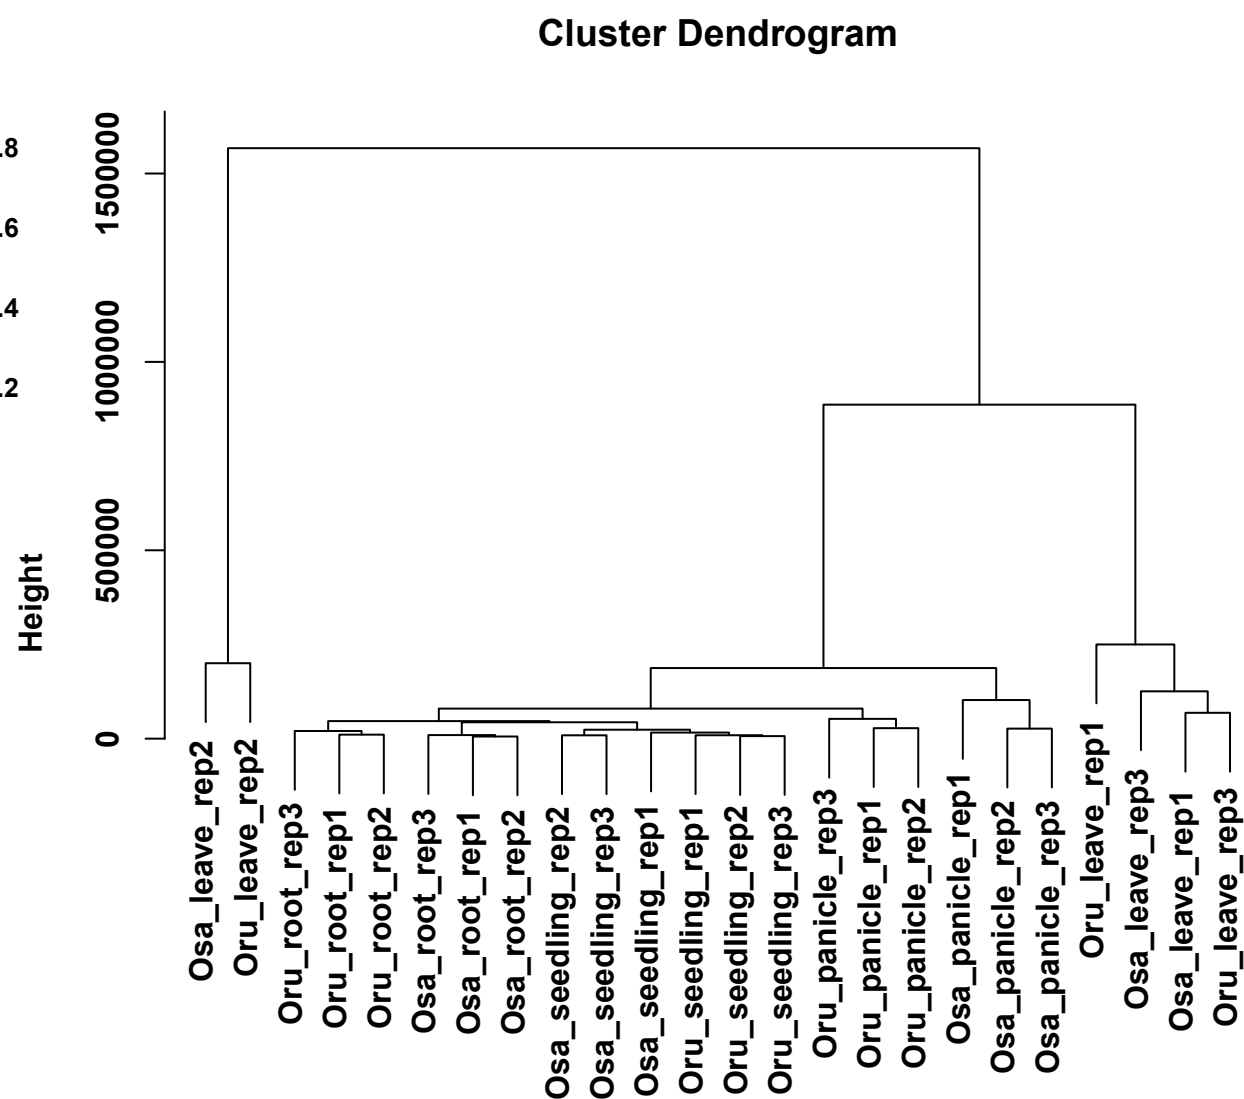

Supplement: Supplementary file 1 [file ijms-24-16313-s001.zip › Figure S5.pdf]
