# Supplementary material for: Comparative Genomic Analysis of Asian Cultivated Rice and Its Wild Progenitor (Oryza rufipogon) Has Revealed Evolutionary Innovation of the Pentatricopeptide Repeat Gene Family through Gene Duplication
Source: Int J Mol Sci. 2023 Nov 14;24(22):16313. doi: 10.3390/ijms242216313 (PMC10671101; doi:10.3390/ijms242216313)
Supplement: Supplementary file 1 [file ijms-24-16313-s001.zip › Table S1.xlsx]

## Sheet: Sheet1
Table S1. The number of PPR genes in the O. sativa genome.
Gene	position	Strand	Class	Exons No.	motifs No.	motif arrangement
LOC_Os01g01115.1	Chr1:58658-61090	+	DYW	1	19	42-SS-SS-P1-30-S1-P1-L1-S1-P1-L1-S1-P1-L1-S1-P2-L2-S2-E1-E2-DYW
LOC_Os01g05860.1	Chr1:2805584-2808152	+	P	2	9	145-P-P-P-P-P-P-P-32-P-P-41
LOC_Os01g06000.1	Chr1:2862560-2867272	-	P	4	20	162-P-P-P-P-P-P-P-P-P-P-P-P-P-P-P-P-P-P-P-P-142
LOC_Os01g07340.1	Chr1:3465634-3467520	-	P	1	9	134-P-P-P-137-P-P-P-P-P-P-38
LOC_Os01g07610.1	Chr1:3661688-3664319	+	P	3	9	9-P-P-P-P-P-P-P-P-P-24
LOC_Os01g08120.1	Chr1:3927450-3929447	-	DYW	1	16	15-P1-L1-S1-P1-L1-S1-SS-P1-L1-S1-P2-L2-S2-E1-E2-DYW
LOC_Os01g10090.1	Chr1:5261189-5262898	-	E2	1	14	42-SS-SS-P1-L1-S1-SS-P1-L1-S1-P2-L2-S2-E1-E2-47
LOC_Os01g10800.1	Chr1:5764652-5767959	-	DYW	1	27	60-P1-L1-S1-P1-L1-S1-P1-L1-S1-P1-L1-S1-P1-L1-S1-P1-L1-S1-P1-L1-S1-P2-L2-S2-E1-E2-DYW
LOC_Os01g12810.3	Chr1:7092032-7095317	+	P	5	12	78-P-P-P-P-P-P-P-P-P-P-P-P-131
LOC_Os01g15530.1	Chr1:8732427-8734486	+	E2	1	11	74-L1-S1-SS-P1-L1-S1-P2-L2-S2-E1-E2-59
LOC_Os01g15840.1	Chr1:8921590-8925372	-	P	1	21	301-P-P-P-P-P-P-P-P-P-P-P-P-137-P-P-P-P-P-P-P-P-83-P
LOC_Os01g17320.1	Chr1:9962629-9966966	+	P	3	7	173-P-34-P-34-P-67-P-P-P-P-57
LOC_Os01g19380.1	Chr1:10965000-10968073	+	PLS	4	12	2-SS-P1-L1-S1-P1-L1-S1-P1-L1-S1-P2-L2-56
LOC_Os01g19490.1	Chr1:11064694-11068774	-	P	2	10	87-P-34-P-P-P-P-P-P-P-P-P-47
LOC_Os01g19529.1	Chr1:11078199-11083482	-	P	2	7	79-P-36-P-P-P-P-37-P-P-87
LOC_Os01g19548.2	Chr1:11089051-11093987	-	P	3	9	71-P-33-P-P-P-P-P-P-P-P-87
LOC_Os01g25270.1	Chr1:14264078-14267208	+	DYW	1	21	36-S1-P1-32-S1-P1-L1-S1-P1-L1-S1-P1-L1-S1-P1-L1-S1-P2-L2-S2-E1-E2-DYW
LOC_Os01g25530.1	Chr1:14471242-14476738	+	E2	7	21	79-S1-P1-L1-S1-P1-L1-S1-P1-L1-S1-P1-L1-S1-P1-L1-S1-P2-L2-S2-E1-E2-15
LOC_Os01g27650.1	Chr1:15418911-15421118	-	E+	1	20	11-L1-S1-P1-L1-S1-P1-L1-S1-P1-L1-S1-P1-L1-S1-P2-L2-S2-E1-E2-E+
LOC_Os01g29430.2	Chr1:16495357-16498522	+	E2	2	19	7-L1-S1-SS-P1-L1-S1-SS-P1-L1-S1-SS-P1-L1-S1-P2-L2-S2-E1-E2-10
LOC_Os01g32090.1	Chr1:17559698-17567805	-	P	3	10	153-P-P-P-P-P-P-P-P-P-P-37
LOC_Os01g32170.1	Chr1:17605172-17607576	+	P	2	10	102-P-P-P-P-P-P-P-P-P-P-79
LOC_Os01g33070.1	Chr1:18176535-18177876	+	E2	2	8	41-SS-60-L1-S1-P2-L2-S2-E1-E2-10
LOC_Os01g36540.1	Chr1:20280855-20282564	+	E2	1	16	8-L1-S1-P1-L1-S1-P1-L1-S1-P1-L1-S1-P2-L2-S2-E1-E2-12
LOC_Os01g36600.1	Chr1:20312945-20314180	-	P	1	4	138-P-32-P-P-P-32
LOC_Os01g36610.1	Chr1:20314316-20316106	+	P	1	10	174-P-P-P-P-P-35-P-P-P-P-P-37
LOC_Os01g37870.2	Chr1:21195432-21201747	+	P	12	9	87-P-34-P-71-P-P-P-P-P-P-P-143
LOC_Os01g40680.1	Chr1:22992552-22994171	-	E1	1	13	20-SS-31-SS-P1-L1-S1-SS-P1-L1-S1-P2-L2-S2-E1-41
LOC_Os01g40720.1	Chr1:23005753-23008941	-	DYW	1	23	99-S1-P1-L1-S1-P1-40-S1-38-L1-S1-P1-L1-S1-P1-L1-S1-P1-L1-S1-P2-L2-S2-E1-E2-DYW
LOC_Os01g41650.1	Chr1:23581143-23584760	+	E2	4	22	59-L1-S1-P1-L1-S1-P1-L1-S1-P1-L1-S1-P1-L1-S1-P1-L1-S1-P2-L2-S2-E1-E2-25
LOC_Os01g42280.1	Chr1:23969757-23972311	+	PLS	1	16	74-L1-S1-P1-L1-S1-P1-L1-S1-P1-L1-S1-SS-SS-P1-L1-S1
LOC_Os01g42620.1	Chr1:24239930-24245230	-	P	4	18	106-P-P-35-P-P-P-P-P-P-P-P-P-P-P-P-P-P-P-P-30
LOC_Os01g45840.1	Chr1:26036642-26039158	+	PLS	2	5	82-P1-L1-S1-P1-L1
LOC_Os01g46230.1	Chr1:26293205-26295001	+	DYW	1	13	14-L1-S1-P1-39-S1-P1-L1-S1-P2-L2-S2-E1-E2-DYW
LOC_Os01g48140.1	Chr1:27565832-27570473	-	P	6	8	101-P-P-33-P-P-P-P-32-P-P-134
LOC_Os01g48380.1	Chr1:27725582-27731537	+	P	9	10	475-P-P-P-P-P-P-P-P-P-P-143
LOC_Os01g51790.1	Chr1:29780279-29783148	+	DYW	3	14	82-L1-37-P1-L1-S1-SS-P1-L1-S1-P2-L2-S2-E1-E2-DYW
LOC_Os01g51810.1	Chr1:29786135-29788237	-	E2	1	16	18-S1-P1-L1-S1-SS-P1-L1-S1-P1-L1-S1-P2-L2-S2-E1-E2-55
LOC_Os01g53610.1	Chr1:30779393-30782727	+	DYW	2	6	400-P1-L1-S1-P2-L2-88-DYW
LOC_Os01g54380.1	Chr1:31286182-31288094	-	P	1	5	135-P-P-36-P-P-P-29
LOC_Os01g55070.1	Chr1:31661724-31664293	-	E1	1	14	11-P1-34-S1-P1-60-P1-L1-S1-P1-93-P1-L1-S1-P2-L2-S2-E1
LOC_Os01g55960.1	Chr1:32231125-32232573	-	E2	1	9	115-L1-S1-P1-L1-S1-P2-37-S2-E1-E2-27
LOC_Os01g57410.1	Chr1:33182589-33186141	+	P	3	18	42-P-P-P-P-P-P-P-P-P-P-P-P-P-P-P-P-P-P-18
LOC_Os01g57630.2	Chr1:33318040-33321777	+	P	2	6	161-P-P-P-P-P-P-61
LOC_Os01g57900.1	Chr1:33478984-33481343	-	P	1	9	233-P-34-P-45-P-P-P-P-P-P-P-42
LOC_Os01g58080.2	Chr1:33593744-33597039	+	P	2	7	132-P-P-P-P-P-P-P-12
LOC_Os01g58630.1	Chr1:33893707-33895999	+	E2	2	11	45-L1-S1-SS-P1-L1-S1-P2-L2-S2-E1-E2-21
LOC_Os01g59890.1	Chr1:34636151-34639624	+	DYW	3	12	60-S1-P1-L1-S1-P1-L1-S1-P2-35-S2-E1-E2-DYW
LOC_Os01g60000.1	Chr1:34685701-34689745	-	E2	2	12	54-P1-L1-S1-SS-P1-L1-S1-P2-L2-S2-E1-563-E2-10
LOC_Os01g60010.1	Chr1:34689869-34691517	+	P	1	8	146-P-P-P-P-P-P-P-67-P-38
LOC_Os01g60250.1	Chr1:34841616-34845610	-	E2	2	13	39-S1-65-SS-P1-L1-S1-P1-L1-S1-P2-L2-S2-E1-E2-66
LOC_Os01g60430.1	Chr1:34946618-34949027	+	DYW	1	15	22-P1-L1-S1-P1-L1-S1-P1-L1-S1-P2-L2-S2-E1-E2-DYW
LOC_Os01g61630.1	Chr1:35658744-35661037	+	P	1	13	127-P-P-P-P-P-P-P-P-P-P-P-P-P-74
LOC_Os01g62220.1	Chr1:36011650-36013020	+	E2	1	12	5-P1-L1-S1-SS-P1-L1-S1-P2-L2-S2-E1-E2-47
LOC_Os01g62910.1	Chr1:36438948-36442944	-	DYW	2	14	77-L1-S1-P1-L1-S1-P1-L1-S1-P2-L2-S2-E1-E2-DYW
LOC_Os01g63400.1	Chr1:36732836-36737403	+	P	4	16	118-P-P-P-P-P-P-P-P-P-P-P-P-P-P-P-P-19
LOC_Os01g65840.1	Chr1:38226380-38228440	-	E2	1	13	54-L1-S1-SS-SS-SS-SS-P1-L1-S1-P2-35-S2-E1-E2-27
LOC_Os01g66160.1	Chr1:38435460-38437074	+	DYW	1	11	8-P1-34-S1-P1-L1-S1-P2-L2-S2-E1-E2-DYW
LOC_Os01g67210.1	Chr1:39000682-39002903	+	P	1	8	222-P-P-P-36-P-P-P-P-P-25
LOC_Os01g68070.1	Chr1:39577048-39580186	+	P	3	8	192-P-P-P-P-P-P-P-P-31
LOC_Os01g68490.1	Chr1:39794226-39799341	-	E2	3	14	45-P1-L1-S1-SS-SS-SS-P1-L1-S1-P2-L2-S2-E1-E2-21
LOC_Os01g68524.1	Chr1:39811722-39819555	-	E2	6	17	120-P1-L1-S1-P1-L1-S1-P1-L1-S1-P1-L1-S1-P2-L2-S2-E1-E2-15
LOC_Os01g68610.1	Chr1:39849645-39851426	-	E2	1	14	80-P1-L1-S1-SS-SS-SS-P1-L1-S1-P2-L2-S2-E1-E2-43
LOC_Os01g71180.1	Chr1:41183800-41186550	+	E2	1	23	97-S1-P1-L1-S1-P1-L1-S1-P1-L1-S1-36-L1-S1-P1-L1-S1-P1-L1-S1-P2-L2-S2-E1-E2-8
LOC_Os01g72930.1	Chr1:42297255-42300253	+	DYW	2	19	42-SS-P1-L1-S1-P1-L1-S1-P1-L1-S1-P1-L1-S1-P2-L2-S2-E1-E2-DYW
LOC_Os01g73950.1	Chr1:42837592-42842621	-	P	2	8	206-P-P-37-P-P-P-P-P-32-P-17
LOC_Os01g74600.1	Chr1:43196120-43198668	+	DYW	1	19	56-S1-P1-L1-S1-P1-L1-S1-P1-L1-S1-P1-L1-S1-P2-L2-S2-E1-E2-DYW
LOC_Os02g01610.2	Chr2:349533-354294	-	DYW	4	19	11-L1-S1-SS-P1-L1-S1-SS-P1-L1-S1-P1-L1-S1-P2-L2-S2-E1-E2-DYW
LOC_Os02g02020.1	Chr2:561823-564487	-	P	1	15	99-P-P-P-P-P-P-P-P-37-P-P-P-P-P-P-32-P-45
LOC_Os02g02590.1	Chr2:938314-941308	-	P	2	6	187-P-34-P-37-P-P-P-P-17
LOC_Os02g02740.1	Chr2:1038334-1039710	-	P	1	6	102-P-36-P-P-P-P-P-19
LOC_Os02g02770.1	Chr2:1047595-1050120	-	P	2	4	151-P-P-P-P-205
LOC_Os02g02950.1	Chr2:1154674-1157039	+	P	1	14	48-P-P-40-P-P-P-P-P-P-P-P-P-P-32-P-P-3
LOC_Os02g03420.1	Chr2:1394865-1397141	+	E2	1	8	104-S1-35-L1-S1-P2-L2-S2-E1-E2-11
LOC_Os02g03530.1	Chr2:1433310-1436998	+	P	2	16	184-P-30-P-P-30-P-P-P-P-P-P-P-P-P-P-P-75-P-P-23
LOC_Os02g03930.1	Chr2:1667744-1672318	-	P	7	18	114-P-P-27-P-P-P-P-P-P-P-P-P-P-P-P-P-P-P-P-74
LOC_Os02g03970.1	Chr2:1708915-1716927	-	P	15	8	89-P-37-P-35-P-P-32-P-P-33-P-37-P-93
LOC_Os02g05720.1	Chr2:2812237-2816193	+	E+	2	23	33-SS-31-SS-SS-SS-P1-L1-S1-SS-SS-SS-P1-L1-S1-SS-P1-L1-S1-P2-L2-S2-E1-E2-E+
LOC_Os02g06880.1	Chr2:3465970-3469079	+	E2	2	11	85-P1-L1-S1-P1-L1-S1-P2-L2-S2-E1-E2-17
LOC_Os02g07050.1	Chr2:3614624-3617164	-	E2	2	20	42-S1-SS-36-L1-S1-P1-L1-S1-SS-SS-P1-L1-S1-P1-L1-S1-P2-L2-S2-E1-E2-57
LOC_Os02g07360.1	Chr2:3798022-3800737	+	P	7	12	174-P-P-P-P-P-P-P-P-P-P-P-P-2
LOC_Os02g09800.1	Chr2:5054309-5058039	+	E+	4	17	36-S1-P1-39-S1-SS-P1-L1-S1-SS-P1-L1-S1-P2-L2-S2-E1-E2-E+
LOC_Os02g13340.1	Chr2:7115786-7119634	+	P	2	13	118-P-32-P-P-P-P-P-P-P-P-P-P-P-P-35
LOC_Os02g16650.1	Chr2:9510002-9514048	+	P	3	14	122-P-P-P-P-P-P-P-P-P-P-P-P-P-P-17
LOC_Os02g18810.1	Chr2:10960622-10968060	+	E2	5	23	54-P1-L1-S1-P1-L1-S1-P1-L1-S1-P1-L1-S1-SS-39-SS-SS-P1-L1-S1-P2-L2-S2-E1-E2-56
LOC_Os02g20160.1	Chr2:11876336-11879831	+	P	3	11	139-P-P-P-P-P-P-P-P-P-P-P-12
LOC_Os02g21070.1	Chr2:12492610-12493561	-	P	2	3	104-P-P-P-3
LOC_Os02g21580.1	Chr2:12815514-12817130	-	P	2	11	51-P-P-P-P-P-P-P-P-P-P-P-66
LOC_Os02g26890.1	Chr2:15788474-15789994	+	P	1	8	191-P-P-P-P-P-P-P-P-31
LOC_Os02g26940.1	Chr2:15821478-15825977	-	PLS	3	14	51-L1-S1-P1-L1-S1-P1-L1-S1-P1-L1-S1-P2-L2-S2-79
LOC_Os02g27070.2	Chr2:15916912-15919906	-	P	2	17	53-P-P-P-P-P-P-P-P-P-P-P-P-P-P-P-P-P-17
LOC_Os02g32780.1	Chr2:19466313-19469360	-	PLS	1	19	35-S1-P1-L1-S1-P1-L1-S1-P1-L1-75-S1-P1-L1-S1-P1-L1-S1-P2-L2-S2-36
LOC_Os02g34700.1	Chr2:20816101-20817861	+	DYW	1	11	112-S1-SS-P1-L1-S1-P2-L2-S2-E1-E2-DYW
LOC_Os02g34960.1	Chr2:20966831-20969333	+	E2	1	13	28-L1-65-P1-L1-S1-SS-P1-L1-S1-P2-L2-S2-E1-E2-53
LOC_Os02g35750.1	Chr2:21471731-21473822	+	P	1	13	64-P-26-P-P-P-P-P-P-P-P-P-P-P-P-12
LOC_Os02g37140.1	Chr2:22452697-22457747	-	P	3	18	152-P-P-P-P-P-P-P-P-P-P-P-P-P-P-P-35-P-P-P-15
LOC_Os02g38950.1	Chr2:23538347-23540253	+	P	2	8	115-P-P-34-P-P-P-P-P-37-P-34
LOC_Os02g39820.1	Chr2:24059188-24062721	+	P	2	8	345-P-P-P-P-P-P-P-34-P-25
LOC_Os02g40750.1	Chr2:24696856-24698448	-	E2	1	14	6-L1-S1-P1-L1-S1-SS-P1-L1-S1-P2-L2-S2-E1-E2-48
LOC_Os02g41560.1	Chr2:24923868-24925349	+	E2	1	12	70-L1-S1-SS-SS-P1-L1-S1-P2-L2-S2-E1-E2-20
LOC_Os02g42210.1	Chr2:25392975-25394765	+	P	1	7	139-P-P-P-P-P-P-P-70
LOC_Os02g43080.1	Chr2:25940341-25944110	+	P	3	18	98-P-55-P-P-P-P-P-P-P-P-P-P-P-P-P-P-P-P-P-44
LOC_Os02g44480.1	Chr2:26922512-26924209	-	E2	1	16	5-L1-S1-P1-L1-S1-P1-L1-S1-P1-L1-S1-P2-L2-S2-E1-E2-19
LOC_Os02g44970.1	Chr2:27238657-27240720	-	E2	1	19	P1-L1-S1-P1-L1-S1-P1-L1-S1-P1-L1-S1-P1-35-S1-P2-L2-S2-E1-E2-15
LOC_Os02g45590.1	Chr2:27735847-27740939	-	P	6	8	338-P-P-P-P-P-P-P-P-166
LOC_Os02g46980.1	Chr2:28681681-28683849	-	DYW	2	12	27-L1-35-P1-L1-S1-P1-L1-S1-P2-36-S2-E1-E2-DYW
LOC_Os02g47360.1	Chr2:28917800-28920757	+	P	2	8	146-P-P-P-79-P-P-P-34-P-P-246
LOC_Os02g48122.1	Chr2:29463827-29465660	-	P	1	7	105-P-33-P-P-76-P-P-P-P-30
LOC_Os02g49830.1	Chr2:30448042-30449508	-	E2	1	11	59-L1-S1-SS-P1-L1-S1-P2-L2-S2-E1-E2-55
LOC_Os02g50280.1	Chr2:30698990-30701615	+	PLS	1	15	124-P1-L1-S1-P1-L1-S1-P1-L1-S1-P1-L1-S1-P1-L1-S1-17
LOC_Os02g51480.1	Chr2:31529599-31531859	+	P	2	10	84-P-P-P-P-P-P-P-P-P-P-55
LOC_Os02g52220.1	Chr2:31975598-31978222	+	P	1	8	220-P-P-P-P-P-P-P-P-53
LOC_Os02g53050.1	Chr2:32462322-32464628	-	E2	1	9	138-SS-31-P1-L1-S1-P2-L2-S2-E1-E2-55
LOC_Os02g55020.1	Chr2:33706516-33708848	+	P	2	12	22-P-P-P-P-P-P-P-P-P-P-P-P-35
LOC_Os02g55310.1	Chr2:33857140-33859405	-	P	2	8	80-P-34-P-P-P-P-35-P-P-P-87
LOC_Os02g57340.1	Chr2:35122839-35126816	+	E2	3	14	96-L1-S1-P1-L1-S1-SS-P1-L1-S1-P2-L2-S2-E1-E2-3
LOC_Os02g57800.1	Chr2:35400295-35403096	-	P	1	23	13-P-51-P-34-P-P-P-P-P-P-P-P-P-P-P-P-P-P-P-P-P-P-P-P-P-30
LOC_Os02g58139.2	Chr2:35572375-35575947	-	P	3	12	109-P-P-P-P-P-P-P-P-P-P-P-P-51
LOC_Os02g58300.1	Chr2:35674797-35676431	-	P	1	6	114-P-32-P-41-P-P-P-P-20
LOC_Os02g58330.1	Chr2:35681629-35683776	+	E2	1	11	79-L1-S1-SS-P1-L1-S1-P2-L2-S2-E1-E2-41
LOC_Os02g58620.1	Chr2:35822996-35829631	+	E1	11	15	58-S1-73-S1-P1-L1-S1-P1-L1-S1-P1-L1-S1-P2-L2-S2-E1-464
LOC_Os03g02430.1	Chr3:861240-862777	-	P	3	9	88-P-P-P-P-P-P-P-P-P-44
LOC_Os03g02762.1	Chr3:1076131-1079382	+	P	1	6	178-P-P-P-P-P-P-39
LOC_Os03g04390.1	Chr3:2014777-2018323	-	DYW	1	18	71-P1-L1-S1-P1-L1-S1-P1-L1-S1-P1-L1-S1-P2-L2-S2-E1-E2-DYW
LOC_Os03g06370.1	Chr3:3186739-3190051	+	P	3	7	95-P-P-P-P-70-P-P-P
LOC_Os03g06710.1	Chr3:3407989-3413958	+	P	3	17	140-P-P-P-P-P-P-P-P-P-P-P-P-P-P-P-P-P-86
LOC_Os03g06910.1	Chr3:3502532-3504478	-	P	1	16	85-P-P-P-P-P-P-P-P-P-P-P-P-P-P-P-P-3
LOC_Os03g07220.1	Chr3:3690005-3694437	+	P	5	25	188-P-P-P-P-P-P-P-P-P-136-P-P-P-P-P-33-P-P-P-P-P-P-P-P-P-P-P-106
LOC_Os03g07234.1	Chr3:3700039-3701586	-	E2	1	14	11-S1-P1-L1-S1-SS-SS-P1-L1-S1-P2-L2-S2-E1-E2-32
LOC_Os03g07330.1	Chr3:3724584-3726496	+	E2	1	12	85-P1-L1-S1-SS-P1-L1-S1-P2-L2-S2-E1-E2-15
LOC_Os03g08680.1	Chr3:4472456-4476109	-	E2	6	10	61-P1-29-L1-S1-P1-33-S1-P2-L2-S2-E1-E2-110
LOC_Os03g10420.1	Chr3:5304975-5307365	+	P	1	15	207-P-P-P-P-P-P-P-P-P-P-P-P-P-P-36-P-27
LOC_Os03g11020.1	Chr3:5669923-5672004	+	P	2	7	184-P-31-P-P-P-P-P-P-71
LOC_Os03g11310.1	Chr3:5817877-5820748	+	P	2	12	151-P-P-P-P-P-P-P-P-P-P-P-P-15
LOC_Os03g11670.1	Chr3:6089248-6091523	-	P	1	10	148-P-P-P-P-P-P-P-P-P-66-P-109
LOC_Os03g11690.2	Chr3:6115338-6118732	+	P	2	10	50-P-30-P-35-P-P-P-P-P-P-P-P-71
LOC_Os03g11700.1	Chr3:6118855-6120196	-	E2	1	10	7-P1-L1-S1-P1-L1-S1-P2-L2-S2-37-E2-9
LOC_Os03g12430.1	Chr3:6563354-6565219	-	P	1	8	119-P-32-P-P-P-P-P-P-P-35
LOC_Os03g13230.1	Chr3:7136651-7138900	+	DYW	1	13	93-SS-P1-L1-S1-P1-L1-S1-P2-L2-S2-E1-E2-DYW
LOC_Os03g13830.1	Chr3:7496050-7499362	-	E+	6	14	53-S1-P1-L1-S1-SS-38-P1-L1-S1-P2-L2-S2-E1-E2-E+
LOC_Os03g16450.1	Chr3:9074313-9076863	+	E2	1	13	5-P1-L1-S1-SS-SS-P1-L1-S1-P2-L2-S2-E1-E2-11
LOC_Os03g17510.1	Chr3:9730414-9732973	-	E2	1	16	13-L1-S1-36-L1-S1-P1-L1-S1-SS-P1-L1-S1-P2-L2-S2-E1-E2-7
LOC_Os03g17634.1	Chr3:9797352-9822129	-	P	12	8	211-P-33-P-39-P-P-P-32-P-35-P-P-186
LOC_Os03g19650.3	Chr3:11048488-11053465	+	P	5	10	110-P-P-P-P-P-P-P-P-P-P-38
LOC_Os03g19980.2	Chr3:11252327-11259529	+	E2	3	17	L1-67-L1-S1-SS-SS-P1-L1-S1-SS-P1-L1-S1-P2-L2-S2-E1-E2-13
LOC_Os03g20190.1	Chr3:11412715-11415488	+	DYW	3	16	47-SS-33-SS-SS-SS-SS-SS-SS-P1-L1-S1-P2-L2-S2-E1-E2-DYW
LOC_Os03g21780.1	Chr3:12444923-12447928	+	P	1	10	127-P-P-P-P-P-P-P-P-35-P-P-26
LOC_Os03g24880.1	Chr3:14174526-14176267	-	P	1	10	184-P-P-P-P-P-P-P-P-P-P-30
LOC_Os03g25380.1	Chr3:14512480-14514592	+	E2	1	13	60-S1-P1-L1-S1-SS-P1-L1-S1-P2-L2-S2-E1-E2-10
LOC_Os03g27880.1	Chr3:16016493-16018739	-	DYW	1	18	31-P1-L1-S1-P1-L1-S1-P1-L1-S1-P1-L1-S1-P2-L2-S2-E1-E2-DYW
LOC_Os03g28270.1	Chr3:16257137-16265284	-	P	10	5	965-P-P-P-P-32-P-252
LOC_Os03g32090.1	Chr3:18355904-18359839	+	PLS	4	15	8-L1-S1-SS-P1-L1-S1-P1-L1-S1-P1-L1-S1-P2-L2-S2-116
LOC_Os03g32620.1	Chr3:18677824-18682844	-	DYW	3	20	58-L1-S1-P1-L1-S1-P1-L1-S1-P1-L1-S1-P1-L1-S1-P2-L2-S2-E1-E2-DYW
LOC_Os03g37260.1	Chr3:20650253-20653294	+	P	1	16	46-P-29-P-P-P-P-P-P-P-P-P-P-P-P-P-P-P-9
LOC_Os03g38580.1	Chr3:21409003-21411259	-	DYW	1	14	70-L1-S1-P1-L1-S1-P1-L1-S1-P2-L2-S2-E1-E2-DYW
LOC_Os03g40020.1	Chr3:22233268-22238894	-	P	1	17	73-P-37-P-P-P-P-P-P-P-P-P-P-P-P-P-P-P-33-P-3
LOC_Os03g40690.1	Chr3:22624156-22628484	+	P	4	23	107-P-P-P-P-P-P-P-P-51-P-P-P-P-P-P-P-P-P-P-P-P-P-P-P-45
LOC_Os03g42650.2	Chr3:23738885-23746139	+	E2	5	11	34-SS-P1-L1-S1-31-L1-S1-P2-L2-S2-E1-E2-11
LOC_Os03g43470.1	Chr3:24250816-24252399	-	E1	1	12	31-L1-32-P1-L1-S1-SS-P1-L1-S1-P2-L2-S2-E1-52
LOC_Os03g44210.1	Chr3:24843226-24845659	-	PLS	1	15	114-S1-P1-L1-S1-P1-L1-S1-P1-L1-S1-P1-L1-S1-P1-L1
LOC_Os03g49464.2	Chr3:28151930-28155430	+	E2	2	19	77-L1-35-SS-SS-P1-L1-S1-SS-P1-L1-S1-SS-P1-L1-S1-P2-L2-S2-E1-E2-42
LOC_Os03g50500.1	Chr3:28830826-28836835	+	P	4	14	121-P-33-P-P-P-P-P-P-P-P-99-P-P-P-P-P-22
LOC_Os03g51840.1	Chr3:29730344-29732399	+	P	1	10	160-P-P-P-P-P-P-P-P-P-P-90
LOC_Os03g52475.1	Chr3:30115650-30116657	-	PLS	1	7	12-L1-S1-35-L1-S1-P2-L2-S2-52
LOC_Os03g52620.1	Chr3:30179543-30181178	+	P	1	5	132-P-P-48-P-P-P-50
LOC_Os03g53170.1	Chr3:30502405-30507088	+	E2	4	14	127-L1-S1-P1-L1-S1-SS-P1-L1-S1-P2-L2-S2-E1-E2-9
LOC_Os03g53490.1	Chr3:30676787-30679242	+	P	1	10	165-P-P-P-P-P-P-P-P-P-P-40
LOC_Os03g55340.1	Chr3:31480148-31483288	+	P	2	11	P-65-P-P-P-P-P-P-P-P-P-P-37
LOC_Os03g56400.1	Chr3:32150804-32153382	-	DYW	1	20	25-L1-S1-SS-P1-L1-S1-SS-P1-L1-S1-SS-P1-L1-S1-P2-L2-S2-E1-E2-DYW
LOC_Os03g56850.1	Chr3:32388963-32392220	+	E2	2	21	38-L1-S1-40-L1-S1-P1-L1-S1-P1-L1-S1-P1-L1-S1-P1-L1-S1-P2-L2-S2-E1-E2-57
LOC_Os03g56960.1	Chr3:32440882-32443979	-	P	3	10	114-P-36-P-P-69-P-P-P-P-P-P-P-48
LOC_Os03g58100.1	Chr3:33078794-33080823	+	DYW	1	14	24-L1-S1-P1-L1-S1-P1-L1-S1-P2-L2-S2-E1-E2-DYW
LOC_Os03g58120.1	Chr3:33091454-33095134	+	P	3	15	97-P-P-36-P-P-P-P-P-P-P-P-P-P-P-P-35-P-56
LOC_Os03g59264.1	Chr3:33744357-33750440	-	E1	10	18	81-S1-P1-L1-S1-SS-SS-P1-L1-S1-SS-SS-P1-L1-S1-P2-L2-S2-E1-486
LOC_Os03g60200.1	Chr3:34238474-34241647	+	DYW	2	14	75-SS-SS-P1-L1-S1-P1-L1-S1-P2-L2-S2-E1-E2-DYW
LOC_Os03g60690.1	Chr3:34493228-34496857	-	DYW	2	11	125-L1-S1-P1-L1-S1-P2-L2-S2-E1-E2-DYW
LOC_Os03g60910.1	Chr3:34609761-34614454	-	P	5	14	102-P-36-P-42-P-P-P-P-P-P-P-P-P-P-P-36-P-162
LOC_Os03g62400.1	Chr3:35345170-35349027	-	E+	3	19	9-S1-P1-L1-S1-P1-L1-S1-P1-L1-S1-P1-L1-S1-P2-L2-S2-E1-E2-E+
LOC_Os03g62690.1	Chr3:35474093-35479956	+	E2	14	17	47-SS-P1-L1-S1-P1-L1-S1-P1-32-S1-P1-L1-S1-P2-L2-S2-E1-E2-605
LOC_Os03g63260.1	Chr3:35741831-35748174	+	E2	4	18	40-SS-31-SS-P1-L1-S1-SS-P1-L1-S1-SS-P1-L1-S1-P2-L2-S2-E1-E2-9
LOC_Os03g63510.1	Chr3:35877542-35882905	-	E2	4	12	7-P1-L1-S1-SS-P1-L1-S1-P2-L2-S2-E1-E2-16
LOC_Os03g63560.1	Chr3:35900686-35903066	-	E2	1	12	106-S1-P1-L1-S1-P1-L1-S1-P2-L2-S2-E1-E2-2
LOC_Os03g63910.1	Chr3:36107251-36110942	+	P	3	10	171-P-P-P-P-P-P-P-P-P-66-P-212
LOC_Os03g64370.1	Chr3:36384991-36386913	+	PLS	1	18	8-P1-L1-S1-P1-L1-S1-P1-L1-S1-P1-L1-S1-P1-L1-S1-P2-L2-S2-14
LOC_Os04g01990.1	Chr4:613779-616346	-	E2	1	13	45-S1-P1-L1-S1-SS-P1-L1-S1-P2-L2-S2-E1-E2-43
LOC_Os04g02850.1	Chr4:1110873-1113296	+	DYW	1	20	9-L1-S1-P1-L1-S1-P1-L1-S1-P1-L1-S1-P1-L1-S1-P2-L2-S2-E1-E2-DYW
LOC_Os04g14130.2	Chr4:7893474-7897863	-	DYW	1	21	27-L1-S1-P1-L1-S1-P1-L1-S1-SS-P1-L1-S1-P1-L1-S1-P2-L2-S2-E1-E2-DYW
LOC_Os04g14450.1	Chr4:8085839-8090712	-	E2	3	11	9-L1-S1-SS-P1-L1-S1-P2-L2-S2-E1-E2-30
LOC_Os04g25410.1	Chr4:14718532-14722122	-	P	2	10	50-P-33-P-P-P-P-P-P-37-P-P-P-47
LOC_Os04g28234.2	Chr4:16684906-16690819	+	P	2	18	150-P-P-P-P-P-P-P-P-P-P-P-P-P-P-P-P-P-P-41
LOC_Os04g28300.1	Chr4:16753556-16757223	+	P	3	15	209-P-P-P-P-P-P-35-P-P-P-P-P-P-P-P-P-72
LOC_Os04g32870.1	Chr4:19849118-19850578	+	E2	1	9	132-S1-SS-P1-35-S1-P2-L2-S2-E1-E2-19
LOC_Os04g33840.1	Chr4:20499421-20501058	+	E2	1	14	5-L1-64-L1-S1-SS-SS-SS-P1-L1-S1-P2-L2-S2-E1-E2-9
LOC_Os04g35305.1	Chr4:21468980-21470947	-	E2	1	17	33-SS-SS-SS-SS-SS-SS-SS-SS-SS-SS-31-L1-S1-P2-L2-S2-E1-E2-44
LOC_Os04g35610.1	Chr4:21703600-21705657	-	E2	1	17	49-S1-SS-P1-L1-S1-P1-L1-S1-SS-P1-L1-S1-P2-L2-S2-E1-E2-62
LOC_Os04g35650.1	Chr4:21725300-21728240	-	E1	1	17	86-SS-35-L1-S1-P1-L1-S1-SS-P1-L1-S1-P1-L1-S1-P2-L2-S2-E1-27
LOC_Os04g36840.1	Chr4:22239221-22242241	-	P	2	11	143-P-36-P-P-P-P-P-P-P-P-P-P-16
LOC_Os04g37720.1	Chr4:22432173-22434744	+	P	2	6	107-P-34-P-P-P-71-P-P-7
LOC_Os04g38930.1	Chr4:23131673-23133502	+	P	1	11	172-P-32-P-P-P-P-P-P-P-P-P-P-20
LOC_Os04g38980.1	Chr4:23153801-23158503	-	E2	5	21	40-S1-P1-L1-S1-P1-L1-S1-P1-L1-S1-P1-L1-S1-P1-L1-S1-P2-L2-S2-E1-E2-172
LOC_Os04g39000.1	Chr4:23163348-23163836	-	P	1	4	1-P-P-P-P-20
LOC_Os04g39410.1	Chr4:23457977-23461347	-	DYW	1	22	65-L1-S1-P1-L1-S1-P1-34-S1-P1-L1-S1-P1-L1-S1-P1-L1-S1-P2-L2-S2-E1-E2-DYW
LOC_Os04g40010.1	Chr4:23815413-23817050	-	P	2	12	77-P-P-P-P-P-P-P-P-P-P-P-P-4
LOC_Os04g40130.1	Chr4:23882661-23885227	-	P	1	11	40-P-P-P-P-P-P-P-P-P-P-P-32
LOC_Os04g41120.1	Chr4:24389132-24390928	+	E2	1	14	76-P1-L1-S1-P1-L1-S1-P1-L1-S1-P2-L2-S2-E1-E2-45
LOC_Os04g41140.1	Chr4:24399162-24402461	-	P	2	20	138-P-P-P-P-P-P-P-P-P-P-P-P-P-P-P-P-P-P-P-P-54
LOC_Os04g43430.2	Chr4:25702074-25707426	-	E2	3	25	90-S1-P1-L1-S1-SS-35-P1-L1-S1-P1-L1-S1-P1-L1-S1-P1-L1-S1-P1-L1-S1-P2-L2-S2-E1-E2-59
LOC_Os04g44030.1	Chr4:26090648-26093773	+	P	1	9	80-P-P-P-P-P-36-P-P-P-P-30
LOC_Os04g46010.1	Chr4:27256245-27258942	-	P	2	10	106-P-35-P-P-P-P-P-P-P-P-P-15
LOC_Os04g49350.1	Chr4:29455859-29458125	+	P	1	13	79-P-37-P-P-P-P-P-P-P-P-P-P-P-P-32
LOC_Os04g49520.1	Chr4:29534884-29538538	-	DYW	1	22	3-L1-S1-SS-P1-L1-S1-SS-P1-L1-S1-P1-L1-S1-SS-P1-L1-S1-P2-36-S2-E1-E2-DYW
LOC_Os04g51350.1	Chr4:30410105-30413205	+	E2	1	17	66-P1-L1-S1-P1-36-S1-P1-L1-S1-P1-L1-S1-P1-L1-S1-P1-68-E1-E2-45
LOC_Os04g52290.1	Chr4:31073380-31076344	-	P	1	10	188-P-P-P-P-P-P-P-P-P-107-P-136
LOC_Os04g52725.1	Chr4:31398698-31400187	+	P	1	8	70-P-P-P-P-P-P-P-P-12
LOC_Os04g53630.1	Chr4:31966462-31968300	+	E2	2	16	10-L1-S1-P1-L1-S1-P1-L1-S1-P1-L1-S1-P2-L2-S2-E1-E2-7
LOC_Os04g55090.1	Chr4:32758857-32762453	+	P	3	7	106-P-35-P-P-P-P-32-P-P-24
LOC_Os04g57670.1	Chr4:34333463-34336668	-	E2	1	18	53-S1-P1-L1-S1-P1-L1-S1-P1-L1-S1-P1-L1-S1-P2-L2-S2-E1-E2-54
LOC_Os04g57900.1	Chr4:34498539-34500540	-	P	1	12	52-P-P-P-35-P-P-P-P-P-P-P-P-P-36
LOC_Os04g57940.1	Chr4:34515402-34517510	-	PLS	1	13	36-L1-S1-P1-L1-S1-35-L1-S1-P1-L1-S1-P2-L2-S2-3
LOC_Os04g58780.1	Chr4:34958612-34970112	+	P	12	15	263-P-P-P-P-P-P-P-P-P-P-P-P-P-P-P-113
LOC_Os04g58980.1	Chr4:35084483-35089011	-	E+	4	17	3-L1-S1-P1-L1-S1-P1-L1-S1-P1-L1-S1-P2-L2-S2-E1-E2-E+
LOC_Os05g01635.1	Chr5:375945-378250	-	E2	2	11	125-L1-S1-SS-P1-L1-S1-P2-L2-S2-E1-E2-52
LOC_Os05g02210.1	Chr5:694389-696374	+	E2	1	15	57-SS-34-SS-SS-SS-SS-SS-SS-SS-P1-32-S1-P2-L2-S2-E1-E2-52
LOC_Os05g04160.1	Chr5:1864582-1866495	+	P	1	16	50-P-P-P-P-P-P-P-P-P-P-P-P-P-P-P-P-31
LOC_Os05g05320.1	Chr5:2618167-2624299	-	P	13	6	47-P-P-P-P-92-P-58-P-47
LOC_Os05g05490.1	Chr5:2734259-2737002	+	E2	2	16	10-L1-S1-P1-L1-S1-P1-L1-S1-P1-L1-S1-P2-L2-S2-E1-E2-31
LOC_Os05g06150.1	Chr5:3083807-3085504	+	E2	1	12	17-L1-S1-P1-L1-S1-P1-L1-S1-P2-37-S2-E1-E2-46
LOC_Os05g11700.1	Chr5:6647138-6648325	+	P	1	7	15-P-33-P-36-P-P-P-P-P-64
LOC_Os05g12130.1	Chr5:6933857-6936591	+	DYW	1	17	47-L1-S1-P1-37-S1-P1-L1-S1-P1-L1-S1-60-S1-P2-L2-S2-E1-E2-DYW
LOC_Os05g18950.1	Chr5:11000428-11002159	+	E2	1	12	71-P1-L1-S1-SS-P1-L1-S1-P2-L2-S2-E1-E2-10
LOC_Os05g19380.1	Chr5:11253553-11256636	-	P	1	16	109-P-P-P-71-P-P-P-P-P-P-P-35-P-P-P-P-P-P-18
LOC_Os05g19390.1	Chr5:11261810-11264629	-	P	2	21	99-P-P-P-P-P-P-P-P-P-P-P-P-P-P-P-P-26-P-P-P-P-P-30
LOC_Os05g22870.1	Chr5:12989680-12992479	-	P	2	11	213-P-54-P-P-35-P-P-P-P-P-P-P-P-68
LOC_Os05g23960.1	Chr5:13795200-13798252	-	DYW	3	20	50-S1-P1-L1-S1-P1-L1-S1-SS-P1-L1-S1-P1-L1-S1-P2-L2-S2-E1-E2-DYW
LOC_Os05g24150.1	Chr5:13929176-13932703	-	E2	5	15	44-L1-37-P1-L1-S1-P1-L1-S1-P1-L1-S1-P2-L2-S2-E1-E2-175
LOC_Os05g24270.1	Chr5:14032750-14033124	+	P	1	3	P-P-P-26
LOC_Os05g24890.1	Chr5:14414408-14416367	+	E2	2	12	162-S1-P1-L1-S1-P1-L1-S1-P2-L2-S2-E1-E2-52
LOC_Os05g24930.1	Chr5:14427967-14432404	-	P	7	17	137-P-P-P-P-P-P-36-P-P-P-P-P-P-P-P-P-P-P-116
LOC_Os05g25060.1	Chr5:14498742-14506826	-	P	10	9	263-P-P-P-P-P-P-P-P-P-273
LOC_Os05g28720.1	Chr5:16845905-16848027	+	P	1	10	220-P-P-P-P-P-P-P-P-P-P-63
LOC_Os05g30240.1	Chr5:17522715-17526484	+	P	2	12	147-P-P-P-P-P-P-P-P-P-P-P-P-334
LOC_Os05g30710.1	Chr5:17783509-17785974	-	DYW	1	16	22-L1-S1-SS-P1-L1-S1-SS-P1-L1-S1-P2-L2-S2-E1-E2-DYW
LOC_Os05g32730.1	Chr5:19166574-19168235	-	P	1	13	65-P-P-P-P-P-P-P-P-P-P-P-P-33-P-1
LOC_Os05g33760.1	Chr5:19894469-19899832	-	P	3	8	173-P-P-P-P-P-P-36-P-P-6
LOC_Os05g33920.1	Chr5:20028098-20029354	+	E2	1	11	10-P1-L1-S1-P1-L1-S1-P2-L2-S2-E1-E2-19
LOC_Os05g34570.1	Chr5:20498924-20501692	-	E+	4	11	33-S1-36-L1-S1-SS-SS-38-P2-L2-S2-E1-E2-E+
LOC_Os05g36350.1	Chr5:21518063-21519885	-	E2	1	12	10-L1-31-P1-L1-S1-SS-P1-L1-S1-P2-37-S2-E1-E2-63
LOC_Os05g38190.2	Chr5:22397889-22403956	+	DYW	6	21	63-P1-L1-S1-P1-L1-S1-P1-L1-S1-P1-L1-S1-P1-L1-S1-P2-L2-S2-E1-E2-DYW
LOC_Os05g40320.1	Chr5:23692827-23697395	+	P	4	6	92-P-70-P-P-P-P-P-18
LOC_Os05g45760.1	Chr5:26504419-26506627	-	P	1	8	108-P-38-P-39-P-P-P-P-P-P-168
LOC_Os05g45850.1	Chr5:26560933-26566642	+	PLS	2	18	70-L1-S1-P1-L1-S1-P1-L1-31-P1-L1-S1-P1-L1-31-P1-L1-S1-P1-L1-S1-142
LOC_Os05g47510.1	Chr5:27219015-27220337	+	P	1	9	94-P-P-P-P-P-P-P-P-P-32
LOC_Os05g49740.1	Chr5:28534151-28536925	-	DYW	1	17	15-L1-S1-P1-L1-S1-P1-L1-S1-P1-L1-S1-P2-L2-S2-E1-E2-DYW
LOC_Os05g49920.1	Chr5:28633062-28635805	+	DYW	1	19	130-S1-P1-L1-S1-P1-L1-S1-P1-L1-S1-P1-L1-S1-P2-L2-S2-E1-E2-DYW
LOC_Os05g50460.1	Chr5:28924125-28926029	+	E2	1	16	18-L1-S1-P1-L1-S1-P1-L1-S1-P1-L1-S1-P2-L2-S2-E1-E2-65
LOC_Os05g50690.1	Chr5:29058243-29062280	-	P	3	11	1-P-P-P-P-P-P-P-P-P-P-P-80
LOC_Os05g50950.1	Chr5:29236686-29240151	+	DYW	3	19	51-L1-S1-P1-L1-31-SS-P1-L1-S1-SS-SS-P1-L1-S1-P2-L2-S2-E1-E2-DYW
LOC_Os06g02120.1	Chr6:629680-633783	-	P	8	14	169-P-P-P-P-P-P-P-P-P-P-58-P-P-P-P-30
LOC_Os06g02200.1	Chr6:676126-678878	+	DYW	2	17	58-L1-S1-P1-L1-S1-P1-L1-S1-P1-L1-S1-P2-L2-S2-E1-E2-DYW
LOC_Os06g02400.1	Chr6:825521-829063	+	E2	3	12	464-L1-32-P1-L1-S1-P1-L1-S1-P2-L2-S2-E1-E2-25
LOC_Os06g03530.1	Chr6:1362999-1367575	+	P	2	9	156-P-P-P-P-P-P-P-P-P-64
LOC_Os06g03570.2	Chr6:1377416-1379454	+	E2	2	11	L1-86-S1-SS-P1-L1-S1-P2-L2-S2-E1-E2-53
LOC_Os06g05140.1	Chr6:2282572-2284863	+	E1	1	21	34-SS-P1-L1-S1-SS-SS-P1-L1-S1-SS-SS-SS-SS-SS-P1-L1-S1-P2-L2-S2-E1-41
LOC_Os06g05920.1	Chr6:2710262-2712458	+	P	2	15	116-P-P-P-P-P-P-P-P-P-P-P-P-P-P-P-60
LOC_Os06g07550.1	Chr6:3640786-3643651	+	P	3	10	123-P-P-P-P-P-P-P-P-P-P-36
LOC_Os06g08570.1	Chr6:4266426-4270771	-	P	1	5	134-P-P-35-P-P-P-32
LOC_Os06g08650.1	Chr6:4313312-4316596	+	E2	2	18	20-L1-S1-P1-L1-S1-P1-L1-S1-35-L1-S1-P1-L1-S1-P2-L2-S2-E1-E2-12
LOC_Os06g08660.1	Chr6:4315693-4319249	-	DYW	1	16	148-S1-P1-L1-S1-P1-L1-S1-P1-L1-S1-P2-L2-S2-E1-E2-DYW
LOC_Os06g09880.1	Chr6:5029395-5035358	-	P	4	24	219-P-37-P-P-P-P-P-P-P-P-31-P-38-P-P-P-P-P-P-P-P-P-P-P-P-P-P-277
LOC_Os06g11300.1	Chr6:5921695-5923664	-	E2	1	13	6-L1-S1-SS-SS-SS-P1-L1-S1-P2-L2-S2-E1-E2-9
LOC_Os06g11304.1	Chr6:5921977-5925597	-	E2	3	13	54-L1-S1-SS-SS-SS-P1-L1-S1-P2-L2-S2-E1-E2-9
LOC_Os06g12360.1	Chr6:6696666-6700782	+	E2	6	17	30-SS-SS-SS-SS-SS-SS-SS-SS-SS-P1-L1-S1-P2-L2-S2-E1-E2-318
LOC_Os06g12510.1	Chr6:6790516-6792069	-	E2	1	14	L1-S1-36-L1-S1-SS-SS-P1-L1-S1-P2-L2-S2-E1-E2-17
LOC_Os06g13950.1	Chr6:7768090-7769904	-	P	1	12	135-P-P-P-P-P-P-P-P-P-P-P-P-42
LOC_Os06g20354.1	Chr6:11693031-11695278	+	P	3	4	165-P-P-P-P-25
LOC_Os06g20870.1	Chr6:12054982-12058674	-	E2	1	24	108-P1-L1-S1-P1-L1-S1-P1-L1-S1-P1-L1-S1-P1-L1-S1-P1-32-S1-P1-35-S1-P2-L2-S2-E1-E2-11
LOC_Os06g27790.1	Chr6:15733745-15737718	+	DYW	3	8	11-L1-S1-P2-L2-S2-E1-E2-DYW
LOC_Os06g29800.1	Chr6:17142218-17144442	-	E2	1	17	36-SS-37-L1-S1-P1-L1-S1-P1-L1-S1-P1-L1-S1-P2-L2-S2-E1-E2-25
LOC_Os06g30420.1	Chr6:17576997-17578925	-	P	1	11	208-P-P-P-P-P-P-P-P-P-P-P-31
LOC_Os06g30940.1	Chr6:17997701-18000860	+	E+	3	20	43-L1-S1-P1-L1-S1-P1-L1-S1-P1-L1-S1-P1-L1-S1-P2-L2-S2-E1-E2-E+
LOC_Os06g36910.1	Chr6:21750356-21752419	+	P	1	15	121-P-31-P-P-P-P-P-P-P-P-P-P-P-P-P-P-10
LOC_Os06g39650.1	Chr6:23547462-23549621	-	E2	1	15	13-P1-L1-S1-P1-L1-S1-SS-P1-L1-S1-P2-L2-S2-E1-E2-12
LOC_Os06g40860.1	Chr6:24369835-24372848	-	E2	2	13	37-L1-S1-P1-L1-S1-36-L1-S1-33-L1-S1-P2-36-S2-E1-E2-35
LOC_Os06g41040.1	Chr6:24510255-24512549	-	DYW	2	14	9-L1-S1-P1-L1-S1-P1-L1-S1-P2-L2-S2-E1-E2-DYW
LOC_Os06g46840.1	Chr6:28433906-28434445	+	E2	1	5	P2-L2-S2-E1-E2-25
LOC_Os06g47570.1	Chr6:28801751-28804726	+	P	1	23	147-P-P-P-P-P-P-P-P-P-P-P-P-P-P-P-P-P-P-P-P-P-P-P-27
LOC_Os06g47920.1	Chr6:28985775-28987849	+	DYW	1	10	29-L1-112-S1-SS-P1-35-S1-36-L2-S2-E1-E2-DYW
LOC_Os06g47950.1	Chr6:28995477-28997357	-	P	1	8	162-P-P-P-P-P-P-P-P-42
LOC_Os06g48660.1	Chr6:29441619-29444248	+	E2	1	13	4-L1-S1-P1-L1-S1-P1-L1-S1-P2-L2-S2-E1-E2-29
LOC_Os06g49185.1	Chr6:29802051-29803832	-	E1	1	16	5-P1-L1-S1-P1-L1-S1-P1-L1-S1-P1-L1-S1-P2-L2-S2-E1-46
LOC_Os06g49670.1	Chr6:30059823-30062860	+	P	4	11	50-P-35-P-P-P-P-P-P-P-P-P-P-22
LOC_Os07g01130.1	Chr7:73162-82300	+	P	11	19	13-P-P-P-P-P-P-P-P-P-P-P-P-P-P-P-P-P-P-P-827
LOC_Os07g02280.1	Chr7:742931-745049	+	DYW	1	13	30-L1-31-P1-32-S1-SS-P1-L1-S1-P2-L2-S2-E1-E2-DYW
LOC_Os07g05560.1	Chr7:2599062-2600840	-	DYW	1	12	11-L1-69-L1-S1-P1-L1-S1-P2-L2-S2-E1-E2-DYW
LOC_Os07g06960.1	Chr7:3426280-3428467	-	E+	2	12	145-L1-S1-SS-P1-L1-S1-P2-L2-S2-E1-E2-E+
LOC_Os07g07620.1	Chr7:3817981-3820729	-	DYW	1	20	78-SS-P1-L1-S1-P1-L1-S1-SS-P1-L1-S1-P1-L1-S1-P2-L2-S2-E1-E2-DYW
LOC_Os07g08180.2	Chr7:4156226-4160559	+	P	4	12	158-P-36-P-P-P-P-P-P-35-P-35-P-P-P-P-42
LOC_Os07g09370.1	Chr7:4935899-4937914	+	DYW	1	12	26-P1-L1-S1-P1-L1-S1-P2-L2-S2-E1-E2-DYW
LOC_Os07g10400.1	Chr7:5582400-5587543	+	E2	7	15	48-S1-P1-L1-S1-P1-L1-S1-P1-L1-S1-P2-L2-S2-E1-E2-172
LOC_Os07g11280.2	Chr7:6224888-6231671	-	P	9	17	10-P-P-P-P-P-P-P-P-P-P-P-P-P-P-P-35-P-P-35
LOC_Os07g12140.1	Chr7:6790686-6796612	+	P	3	8	175-P-34-P-34-P-P-33-P-P-P-P-52
LOC_Os07g13540.1	Chr7:7753929-7757879	-	DYW	3	17	44-S1-P1-L1-S1-SS-P1-L1-S1-P1-L1-S1-P2-L2-S2-E1-E2-DYW
LOC_Os07g14100.1	Chr7:8043463-8045191	-	PLS	1	7	144-S1-39-L1-S1-P1-L1-S1-P1-13
LOC_Os07g14530.3	Chr7:8281895-8286284	-	P	2	20	143-P-P-P-P-P-P-P-P-P-P-P-P-P-P-P-P-P-P-P-P-40
LOC_Os07g15570.1	Chr7:9022284-9023849	+	E2	1	13	5-L1-S1-P1-L1-S1-P1-L1-S1-P2-L2-S2-E1-E2-68
LOC_Os07g15640.1	Chr7:9071856-9077790	-	PLS	8	13	75-P1-L1-S1-SS-SS-SS-SS-P1-L1-S1-P2-L2-S2-240
LOC_Os07g19400.1	Chr7:11479597-11481898	+	E2	1	16	72-L1-30-P1-L1-S1-SS-P1-L1-S1-P1-L1-S1-P2-L2-S2-E1-E2-57
LOC_Os07g20420.1	Chr7:11788919-11792494	-	DYW	2	12	92-L1-S1-P1-L1-32-P1-L1-S1-P2-36-S2-E1-E2-DYW
LOC_Os07g20510.1	Chr7:11845862-11851637	+	P	8	22	173-P-P-P-P-P-P-P-P-P-P-P-P-P-P-P-P-P-P-P-P-P-P-319
LOC_Os07g25500.1	Chr7:14606244-14609276	+	E2	2	12	66-L1-S1-32-L1-S1-P1-L1-S1-P2-L2-S2-E1-E2-10
LOC_Os07g28900.1	Chr7:16942185-16946832	-	P	5	18	78-P-P-P-P-44-P-P-P-P-P-33-P-P-P-P-P-P-P-P-68-P-161
LOC_Os07g30930.1	Chr7:18309682-18312468	+	P	1	13	185-P-P-P-P-P-P-P-P-P-P-P-P-P-14
LOC_Os07g31310.1	Chr7:18536372-18541354	-	P	3	7	287-P-39-P-90-P-P-45-P-P-P-46
LOC_Os07g32900.1	Chr7:19668378-19673208	+	P	4	13	221-P-28-P-P-P-P-P-P-P-P-P-P-P-P-50
LOC_Os07g36390.1	Chr7:21753822-21757322	+	P	4	12	147-P-38-P-P-P-P-P-P-P-P-P-P-P-39
LOC_Os07g39090.1	Chr7:23425405-23430886	-	E+	6	15	372-P1-L1-S1-P1-L1-S1-P1-L1-S1-P2-L2-S2-E1-E2-E+
LOC_Os07g39910.1	Chr7:23933063-23935489	-	DYW	1	17	93-SS-P1-L1-S1-SS-P1-39-S1-SS-P1-L1-S1-P2-L2-S2-E1-E2-DYW
LOC_Os07g40120.1	Chr7:24071181-24073535	+	P	1	17	140-P-P-36-P-P-P-P-P-P-P-P-P-P-P-P-P-P-P-17
LOC_Os07g40750.1	Chr7:24419883-24422332	-	P	2	9	95-P-34-P-P-P-36-P-P-P-P-P-21
LOC_Os07g40800.1	Chr7:24451618-24455574	+	P	7	6	148-P-35-P-123-P-47-P-P-P-59
LOC_Os07g40820.1	Chr7:24460892-24462436	-	P	1	5	220-P-P-P-31-P-P-63
LOC_Os07g41260.1	Chr7:24724562-24728180	+	P	2	6	146-P-32-P-42-P-P-P-P-54
LOC_Os07g42354.1	Chr7:25333309-25338730	+	P	10	16	140-P-P-P-P-P-P-P-P-P-P-P-P-P-P-P-P-200
LOC_Os07g42880.1	Chr7:25672201-25674075	+	P	1	14	76-P-P-P-P-P-P-P-P-P-P-P-P-P-P-54
LOC_Os07g44170.1	Chr7:26397495-26399612	+	E2	1	17	87-S1-P1-L1-S1-P1-L1-S1-P1-L1-S1-P1-L1-S1-P2-36-S2-E1-E2-7
LOC_Os07g44299.1	Chr7:26468910-26470733	-	DYW	1	13	69-L1-S1-SS-SS-P1-L1-S1-P2-L2-S2-E1-E2-DYW
LOC_Os07g46730.1	Chr7:27929310-27932769	-	P	2	6	163-P-P-P-P-P-P-67
LOC_Os07g46770.1	Chr7:27948906-27950765	+	DYW	1	13	8-L1-S1-SS-SS-P1-L1-S1-P2-L2-S2-E1-E2-DYW
LOC_Os07g47370.1	Chr7:28335316-28337597	-	E2	1	17	66-S1-P1-L1-S1-P1-L1-S1-P1-30-S1-P1-L1-S1-P2-L2-S2-E1-E2-58
LOC_Os07g47470.1	Chr7:28373368-28375023	-	P	1	12	106-P-P-P-P-P-P-P-P-P-P-P-P-24
LOC_Os07g47720.1	Chr7:28503059-28505494	-	P	1	14	9-P-78-P-P-P-P-P-P-P-P-P-P-P-P-P-144
LOC_Os07g48850.1	Chr7:29227754-29232888	-	P	3	14	159-P-P-P-P-P-P-P-P-P-P-P-P-P-P-16
LOC_Os08g01640.1	Chr8:374091-376752	-	P	1	19	90-P-P-P-P-P-P-P-P-P-P-P-P-P-P-P-P-P-P-P-36
LOC_Os08g01650.1	Chr8:381307-383986	-	P	1	16	26-P-37-P-P-P-P-P-P-P-P-P-P-P-P-P-P-P
LOC_Os08g01870.1	Chr8:536344-539032	+	P	1	17	95-P-P-P-P-P-P-P-P-P-P-P-P-P-P-P-P-P-103
LOC_Os08g02040.1	Chr8:658503-661608	-	E2	3	16	41-L1-32-P1-L1-S1-SS-P1-L1-S1-P1-L1-S1-P2-L2-S2-E1-E2-53
LOC_Os08g03676.1	Chr8:1749850-1752468	+	E2	1	19	37-S1-SS-SS-SS-SS-SS-P1-L1-S1-SS-SS-P1-L1-S1-P2-L2-S2-E1-E2-14
LOC_Os08g04400.1	Chr8:2154469-2159036	+	DYW	5	13	149-S1-P1-L1-S1-P1-L1-S1-P2-L2-S2-E1-E2-DYW
LOC_Os08g05750.1	Chr8:3079277-3084580	-	DYW	5	14	47-SS-SS-SS-SS-SS-P1-L1-S1-P2-L2-S2-E1-E2-DYW
LOC_Os08g06490.1	Chr8:3677031-3679364	+	E2	2	14	8-P1-L1-S1-SS-SS-SS-SS-P1-37-S1-P2-L2-S2-E1-E2-10
LOC_Os08g06500.1	Chr8:3680925-3688728	+	P	4	7	264-P-P-P-69-P-P-P-P-48
LOC_Os08g09270.1	Chr8:5384443-5388851	+	P	7	9	141-P-P-P-P-32-P-P-P-P-P-118
LOC_Os08g13990.1	Chr8:8389386-8393585	+	E2	4	10	257-L1-S1-P1-L1-S1-P2-L2-S2-E1-E2-53
LOC_Os08g15000.1	Chr8:9050292-9051574	+	P	2	9	20-P-42-P-P-P-P-P-P-P-P-14
LOC_Os08g15010.1	Chr8:9052366-9058406	+	P	2	6	1546-P-P-P-P-P-P-71
LOC_Os08g15090.1	Chr8:9127977-9136745	-	E+	14	12	170-P1-L1-32-SS-P1-L1-S1-P2-L2-S2-E1-E2-E+
LOC_Os08g17080.1	Chr8:10453817-10458045	+	P	3	8	142-P-P-P-35-P-P-P-31-P-P-41
LOC_Os08g19310.1	Chr8:11552519-11554939	-	P	1	16	184-P-P-P-P-P-P-P-P-P-P-P-P-P-P-P-P-60
LOC_Os08g20610.1	Chr8:12381718-12383925	+	P	1	17	71-P-P-P-P-P-P-P-P-P-P-P-P-P-47-P-P-P-P-22
LOC_Os08g21561.1	Chr8:12843778-12845603	+	P	1	13	9-P-P-P-P-P-P-P-P-P-59-P-P-P-P-15
LOC_Os08g25280.1	Chr8:15354219-15357294	+	E+	1	22	52-SS-P1-L1-S1-P1-L1-S1-P1-L1-S1-P1-L1-S1-P1-L1-S1-P2-L2-S2-E1-E2-E+
LOC_Os08g28180.1	Chr8:17199310-17203084	+	P	2	8	102-P-P-P-P-80-P-P-P-P-48
LOC_Os08g28830.1	Chr8:17628667-17631205	+	E2	1	16	26-S1-P1-L1-S1-P1-34-S1-P1-37-S1-P1-L1-S1-P2-L2-S2-E1-E2-59
LOC_Os08g31110.1	Chr8:19215829-19217809	+	P	1	14	14-P-P-P-P-P-P-P-P-P-P-P-P-P-P-2
LOC_Os08g33700.1	Chr8:21043003-21047252	+	DYW	3	11	21-L1-68-L1-S1-P1-L1-S1-P2-L2-33-E1-E2-DYW
LOC_Os08g37520.1	Chr8:23755951-23763739	-	E2	5	14	15-SS-32-SS-SS-SS-SS-SS-P1-L1-S1-P2-L2-S2-E1-E2-58
LOC_Os08g38610.1	Chr8:24402186-24406138	+	E2	5	11	111-L1-S1-P1-60-P1-L1-S1-P2-L2-S2-E1-E2-73
LOC_Os08g39050.1	Chr8:24673130-24676744	+	P	3	7	145-P-P-P-P-P-P-P-53
LOC_Os08g39130.1	Chr8:24716313-24718310	+	E2	1	15	58-P1-L1-S1-SS-SS-SS-SS-P1-L1-S1-P2-L2-S2-E1-E2-3
LOC_Os08g40020.1	Chr8:25344705-25346660	+	E2	2	14	8-P1-L1-S1-P1-L1-S1-P1-L1-S1-P2-L2-S2-E1-E2-14
LOC_Os08g41380.1	Chr8:26134035-26137488	+	P	2	9	148-P-P-P-P-P-P-P-P-P
LOC_Os08g42610.1	Chr8:26932311-26935259	-	E2	2	13	92-L1-S1-P1-L1-S1-P1-L1-S1-P2-L2-S2-E1-E2-47
LOC_Os09g02260.1	Chr9:915351-918134	-	P	1	17	136-P-P-P-P-P-P-P-P-P-P-P-P-P-P-36-P-P-P-14
LOC_Os09g07780.1	Chr9:3935205-3938411	-	DYW	1	22	3-L1-S1-P1-32-S1-P1-L1-S1-P1-L1-S1-P1-L1-S1-P1-L1-S1-P2-L2-S2-E1-E2-DYW
LOC_Os09g15800.1	Chr9:9647717-9650347	-	DYW	2	18	37-SS-SS-SS-SS-SS-SS-SS-SS-SS-SS-P1-L1-S1-P2-36-S2-E1-E2-DYW
LOC_Os09g24240.1	Chr9:14390145-14392934	-	E2	1	13	125-S1-SS-SS-SS-SS-P1-L1-S1-P2-L2-S2-E1-E2-57
LOC_Os09g24520.1	Chr9:14603951-14607125	-	E2	3	11	44-L1-79-L1-S1-SS-P1-L1-S1-P2-33-S2-E1-E2-21
LOC_Os09g24640.1	Chr9:14666229-14667809	+	E2	1	12	2-L1-31-P1-L1-S1-P1-L1-S1-P2-L2-S2-E1-E2-56
LOC_Os09g24680.1	Chr9:14687748-14690180	-	E2	1	21	68-L1-S1-P1-L1-S1-P1-L1-S1-32-L1-S1-P1-L1-S1-P1-L1-S1-P2-L2-S2-E1-E2-5
LOC_Os09g25050.1	Chr9:14971348-14975386	+	P	4	14	105-P-P-P-P-P-P-P-P-P-P-P-P-P-P-20
LOC_Os09g25550.1	Chr9:15328754-15332301	+	P	2	20	190-P-37-P-P-P-P-P-P-P-P-P-P-P-P-36-P-P-P-P-P-P-P-2
LOC_Os09g26190.1	Chr9:15790768-15800951	+	P	12	8	23-P-P-26-P-P-P-P-P-P-244
LOC_Os09g29790.1	Chr9:18101204-18109313	-	P	13	9	135-P-70-P-109-P-P-34-P-48-P-P-P-P-159
LOC_Os09g29825.1	Chr9:18135734-18136435	+	DYW	1	13	42-P1-L1-S1-SS-P1-L1-S1-P2-L2-S2-E1-E2-DYW
LOC_Os09g34870.1	Chr9:20321887-20325772	+	E2	3	16	61-SS-P1-L1-S1-SS-P1-L1-S1-SS-P1-L1-S1-P2-L2-S2-38-E2-124
LOC_Os09g36230.1	Chr9:20894912-20896719	+	P	3	6	154-P-P-P-P-P-P-58
LOC_Os09g37070.1	Chr9:21381376-21383319	-	P	1	10	143-P-P-P-P-P-P-37-P-P-P-P-12
LOC_Os09g38310.1	Chr9:22036957-22040688	-	E2	4	16	8-L1-31-P1-L1-S1-P1-L1-S1-SS-P1-L1-S1-P2-L2-S2-E1-E2-65
LOC_Os09g39970.1	Chr9:22917204-22925592	+	E+	11	12	52-P1-L1-S1-P1-L1-S1-P2-L2-S2-E1-E2-E+
LOC_Os10g02650.1	Chr10:1033932-1037595	-	P	4	23	12-P-P-P-P-P-P-P-P-P-35-P-P-P-P-P-P-P-P-44-P-P-P-P-P-P-53
LOC_Os10g10170.1	Chr10:5577483-5585549	-	P	18	12	234-P-32-P-P-P-P-P-P-P-P-P-P-P-213
LOC_Os10g21470.2	Chr10:10994692-10997385	-	P	2	8	100-P-P-P-P-P-113-P-32-P-P-21
LOC_Os10g21920.1	Chr10:11289218-11290756	+	P	1	9	144-P-P-P-36-P-P-P-P-P-P-17
LOC_Os10g22370.1	Chr10:11571002-11576569	-	P	5	15	138-P-P-P-P-P-P-P-P-P-P-P-P-P-P-P-253
LOC_Os10g26070.1	Chr10:13501851-13503816	-	E2	1	15	6-L1-83-L1-S1-P1-L1-S1-SS-P1-L1-S1-P2-L2-S2-E1-E2-55
LOC_Os10g28600.1	Chr10:14897142-14900931	-	P	2	26	89-P-35-P-P-P-P-P-P-P-P-P-P-P-P-P-P-P-36-P-P-P-P-P-P-P-P-P-P-11
LOC_Os10g28640.1	Chr10:14925735-14929778	+	P	7	7	126-P-P-P-P-37-P-P-P-233
LOC_Os10g30590.1	Chr10:15918243-15923352	+	E2	5	12	26-P1-L1-S1-SS-P1-L1-S1-P2-L2-S2-E1-E2-56
LOC_Os10g30760.1	Chr10:16021744-16024505	-	DYW	3	14	63-L1-S1-P1-L1-S1-P1-L1-S1-P2-L2-S2-E1-E2-DYW
LOC_Os10g33700.2	Chr10:17773192-17776920	-	P	3	12	136-P-P-P-P-P-P-P-P-P-P-P-P-43
LOC_Os10g33730.1	Chr10:17800146-17803223	-	DYW	1	17	9-P1-L1-S1-SS-SS-P1-L1-S1-P1-L1-S1-P2-L2-S2-E1-E2-DYW
LOC_Os10g33874.1	Chr10:17980294-17985456	+	P	8	16	200-P-36-P-P-P-P-P-P-P-P-P-P-P-P-P-P-P-32
LOC_Os10g34310.2	Chr10:18297837-18300228	-	P	2	10	155-P-P-38-P-P-P-P-P-P-P-P-35
LOC_Os10g34370.1	Chr10:18318955-18320451	-	P	1	7	149-P-P-P-P-P-P-P-21
LOC_Os10g34720.1	Chr10:18540559-18542794	+	DYW	1	16	19-L1-S1-P1-L1-S1-36-L1-S1-P1-L1-S1-P2-L2-S2-E1-E2-DYW
LOC_Os10g35230.1	Chr10:18823675-18825328	-	P	1	12	11-P-37-P-P-P-P-P-P-P-P-P-P-P
LOC_Os10g35240.2	Chr10:18832177-18836049	-	P	2	19	19-P-37-P-P-P-P-P-P-P-P-P-P-P-P-P-P-P-P-P-P-57
LOC_Os10g35260.1	Chr10:18846830-18849084	-	P	4	8	193-P-38-P-P-P-P-P-P-P-2
LOC_Os10g35436.1	Chr10:18935690-18942573	+	P	9	19	18-P-37-P-P-P-P-P-P-P-P-P-P-P-P-P-P-P-P-P-P-71
LOC_Os10g35440.1	Chr10:18951471-18953729	+	P	1	5	14-P-37-P-P-38-P-P-1
LOC_Os10g35640.1	Chr10:19056887-19059683	+	P	2	12	17-P-37-P-P-P-P-P-P-P-P-P-P-P-29
LOC_Os10g35730.1	Chr10:19104084-19105750	+	P	2	7	12-P-32-P-40-P-P-P-P-P-12
LOC_Os10g35750.1	Chr10:19108875-19111044	+	P	2	10	113-P-P-32-P-P-P-P-P-P-P-35-P-12
LOC_Os10g35760.1	Chr10:19112196-19114289	+	P	2	9	81-P-34-P-P-P-P-38-P-P-P-35-P-12
LOC_Os10g35790.1	Chr10:19142222-19143586	-	P	1	12	10-P-P-P-P-P-P-P-P-P-P-P-P-28
LOC_Os10g36190.1	Chr10:19350161-19351951	+	P	1	8	181-P-35-P-P-P-P-P-P-P-11
LOC_Os10g39460.1	Chr10:21058117-21061300	-	DYW	3	16	41-S1-P1-L1-S1-P1-L1-S1-P1-L1-S1-P2-L2-S2-E1-E2-DYW
LOC_Os10g40920.1	Chr10:21983939-21987321	+	E+	1	24	56-L1-S1-SS-P1-L1-S1-P1-L1-S1-P1-L1-S1-P1-L1-S1-P1-L1-S1-P2-L2-S2-E1-E2-E+
LOC_Os10g41740.1	Chr10:22467034-22468623	+	E1	1	12	126-SS-P1-L1-S1-SS-P1-L1-S1-P2-L2-S2-E1
LOC_Os10g42760.1	Chr10:23069756-23071683	-	P	1	11	107-P-31-P-35-P-P-P-33-P-P-P-P-P-P-40
LOC_Os11g01210.1	Chr11:127373-129004	+	P	1	11	48-P-P-P-43-P-P-P-P-P-P-P-P-62
LOC_Os11g01836.1	Chr11:445332-447925	-	DYW	1	13	105-S1-P1-L1-S1-P1-L1-S1-P2-L2-S2-E1-E2-DYW
LOC_Os11g01860.1	Chr11:454614-457051	+	E2	1	20	23-S1-P1-L1-S1-P1-L1-S1-P1-L1-S1-P1-L1-32-P1-L1-S1-P2-L2-S2-E1-E2-9
LOC_Os11g02310.1	Chr11:671757-675572	+	E1	4	10	L1-S1-SS-SS-P1-L1-S1-P2-33-S2-E1
LOC_Os11g03690.1	Chr11:1435829-1437759	+	DYW	1	9	176-S1-44-L1-S1-P2-L2-S2-E1-E2-DYW
LOC_Os11g03850.1	Chr11:1534932-1535799	-	P	1	6	77-P-P-P-P-P-P
LOC_Os11g04295.1	Chr11:1777855-1781348	-	P	2	17	98-P-P-P-P-P-P-P-P-P-P-P-P-P-P-P-P-50-P-79
LOC_Os11g05980.1	Chr11:2814473-2817216	+	E1	1	4	32-S1-P2-30-S2-E1
LOC_Os11g10740.1	Chr11:5895364-5896776	+	E2	1	12	5-L1-S1-31-L1-S1-P1-L1-S1-P2-L2-S2-E1-E2-27
LOC_Os11g14980.1	Chr11:8439761-8441556	-	E2	1	15	55-S1-P1-L1-S1-P1-L1-S1-P1-L1-S1-P2-L2-S2-E1-E2-18
LOC_Os11g17530.1	Chr11:9768069-9771823	+	E2	2	10	219-L1-S1-P1-L1-S1-P2-L2-S2-E1-E2-53
LOC_Os11g24530.1	Chr11:13986428-13988479	+	E2	1	15	40-SS-32-SS-SS-SS-SS-SS-SS-P1-L1-S1-P2-L2-S2-E1-E2-60
LOC_Os11g24570.1	Chr11:14027553-14029899	+	P	1	11	101-P-35-P-P-P-P-P-P-P-P-P-P-127
LOC_Os11g29230.1	Chr11:16943497-16946706	+	DYW	2	17	77-L1-S1-P1-L1-S1-P1-L1-S1-P1-L1-S1-P2-L2-S2-E1-E2-DYW
LOC_Os11g29360.1	Chr11:17032753-17034236	-	E2	1	10	123-L1-S1-P1-L1-S1-P2-L2-S2-E1-E2-12
LOC_Os11g37330.1	Chr11:22040368-22044971	+	DYW	4	16	14-L1-S1-P1-L1-S1-P1-35-S1-P1-L1-S1-P2-L2-S2-E1-E2-DYW
LOC_Os11g37660.1	Chr11:22223651-22231042	-	E2	4	17	48-S1-P1-L1-S1-P1-L1-S1-P1-L1-S1-P1-L1-S1-P2-L2-34-E1-E2-10
LOC_Os11g39360.1	Chr11:23427261-23429925	+	P	3	16	110-P-P-P-P-P-P-P-P-P-P-P-P-P-P-P-P-3
LOC_Os11g43800.1	Chr11:26455695-26460071	+	P	4	18	216-P-55-P-P-P-P-P-P-P-P-P-P-P-P-P-P-P-P-P-21
LOC_Os11g43934.1	Chr11:26527574-26531006	-	DYW	2	13	119-S1-36-L1-S1-SS-P1-L1-S1-P2-L2-S2-E1-E2-DYW
LOC_Os11g44930.1	Chr11:27198382-27199929	-	E2	1	9	155-SS-38-P1-L1-S1-P2-L2-S2-E1-E2-17
LOC_Os11g45410.1	Chr11:27492479-27497702	-	E+	6	23	5-P1-38-S1-P1-L1-S1-P1-L1-S1-P1-L1-S1-P1-L1-S1-P1-L1-S1-P2-L2-S2-E1-E2-E+
LOC_Os12g01210.1	Chr12:125923-128386	+	P	1	12	128-P-39-P-P-P-43-P-P-P-P-P-P-P-P-62
LOC_Os12g01850.1	Chr12:496700-502261	-	DYW	2	14	70-L1-S1-P1-L1-S1-P1-L1-S1-P2-L2-S2-E1-E2-DYW
LOC_Os12g01910.1	Chr12:531180-535127	+	E2	4	20	21-SS-P1-L1-S1-P1-L1-S1-P1-L1-S1-P1-L1-32-P1-L1-S1-P2-L2-S2-E1-E2-150
LOC_Os12g02280.1	Chr12:718524-722216	+	E2	3	12	L1-65-L1-S1-SS-SS-P1-L1-S1-P2-33-S2-E1-E2-10
LOC_Os12g03450.1	Chr12:1346249-1348258	+	DYW	1	10	157-SS-P1-L1-S1-P2-L2-S2-E1-E2-DYW
LOC_Os12g03700.1	Chr12:1494517-1495560	-	PLS	1	3	7-P1-L1-S1
LOC_Os12g04110.1	Chr12:1719707-1726259	-	P	8	17	871-P-P-P-P-P-P-P-P-P-P-P-P-P-P-P-P-50-P-78
LOC_Os12g05640.1	Chr12:2592072-2594898	-	P	1	14	195-P-P-P-P-P-P-P-P-P-P-P-P-P-P-30
LOC_Os12g06070.1	Chr12:2830044-2831936	+	DYW	1	14	55-L1-S1-P1-L1-S1-P1-L1-S1-P2-L2-S2-E1-E2-DYW
LOC_Os12g06650.1	Chr12:3226519-3229144	-	DYW	1	13	46-S1-P1-L1-S1-P1-L1-S1-P2-L2-S2-E1-E2-DYW
LOC_Os12g07260.1	Chr12:3566986-3572003	-	P	4	6	242-P-34-P-67-P-P-P-P-57
LOC_Os12g08140.1	Chr12:4163633-4168252	+	DYW	2	12	73-P1-L1-S1-P1-L1-S1-P2-L2-S2-E1-E2-DYW
LOC_Os12g10184.1	Chr12:5384958-5387143	+	PLS	1	16	93-L1-S1-P1-L1-S1-P1-L1-S1-P1-L1-S1-P1-L1-S1-P2-L2-40
LOC_Os12g13110.1	Chr12:7289214-7291739	-	E2	3	14	100-P1-L1-S1-P1-L1-S1-SS-P1-36-S1-P2-L2-S2-E1-E2-90
LOC_Os12g15460.1	Chr12:8823315-8827128	-	E2	3	21	48-S1-P1-L1-S1-P1-L1-S1-P1-L1-S1-P1-L1-S1-P1-L1-S1-P2-L2-S2-E1-E2-23
LOC_Os12g17080.1	Chr12:9777751-9782552	+	DYW	4	11	3-L1-72-L1-S1-41-L1-S1-P2-L2-S2-E1-E2-DYW
LOC_Os12g18640.1	Chr12:10766538-10769036	+	P	2	12	111-P-P-P-P-P-36-P-P-P-P-P-P-P-74
LOC_Os12g19260.1	Chr12:11166091-11169301	-	E2	4	20	41-SS-SS-SS-SS-SS-SS-SS-SS-SS-SS-SS-SS-P1-L1-S1-P2-L2-S2-E1-E2-70
LOC_Os12g21930.1	Chr12:12349459-12352410	+	P	3	7	213-P-P-P-P-P-P-P
LOC_Os12g27060.1	Chr12:15842475-15845828	+	P	1	20	241-P-P-P-P-P-P-P-P-P-P-166-P-P-P-P-P-P-P-P-P-P-11
LOC_Os12g30620.1	Chr12:18388480-18391056	+	E2	1	12	9-L1-S1-SS-SS-P1-L1-S1-P2-L2-S2-E1-E2-41
LOC_Os12g34340.1	Chr12:20814294-20816344	+	P	2	10	74-P-P-33-P-P-P-P-P-P-P-P-55
LOC_Os12g36620.1	Chr12:22419758-22427185	-	E+	10	22	76-S1-P1-L1-S1-P1-L1-S1-P1-L1-S1-P1-L1-S1-P1-L1-S1-P2-L2-S2-E1-E2-E+
LOC_Os12g37100.1	Chr12:22723143-22726843	-	P	2	15	152-P-P-P-P-P-P-P-P-P-P-P-P-P-P-P-18
LOC_Os12g37550.1	Chr12:23042111-23045067	+	P	4	6	9-P-P-P-P-P-67-P-129
LOC_Os12g38880.1	Chr12:23912105-23914774	-	E2	1	12	5-L1-S1-SS-SS-SS-P1-L1-S1-P2-36-S2-E1-E2-55
LOC_Os12g42120.1	Chr12:26117865-26120045	+	P	1	16	106-P-P-P-P-P-P-P-P-P-P-P-P-P-P-P-P-41
LOC_Os12g44170.1	Chr12:27398576-27403415	-	P	3	9	365-P-P-P-P-P-P-P-P-68-P-112
