# Supplementary material for: Comparative Genomic Analysis of Asian Cultivated Rice and Its Wild Progenitor (Oryza rufipogon) Has Revealed Evolutionary Innovation of the Pentatricopeptide Repeat Gene Family through Gene Duplication
Source: Int J Mol Sci. 2023 Nov 14;24(22):16313. doi: 10.3390/ijms242216313 (PMC10671101; doi:10.3390/ijms242216313)
Supplement: Supplementary file 1 [file ijms-24-16313-s001.zip › Table S2.xlsx]

## Sheet: Sheet1
Table S2. The number of PPR genes in the O. rufipogon genome.
Gene	position	Strand	Class	Exons No.	motifs No.	motif arrangement
RUF000036.t1	Chr1:486012-491028	+	DYW	6	19	42-SS-SS-P1-30-S1-P1-L1-S1-P1-L1-S1-P1-L1-S1-P2-L2-S2-E1-E2-DYW
RUF000374.t1	Chr1:3204493-3206844	+	P	2	9	145-P-P-P-P-P-P-P-32-P-P-42
RUF000389.t1	Chr1:3294480-3297311	-	P	1	20	185-P-P-P-P-P-P-P-P-P-P-P-P-P-P-P-P-P-P-P-P-25
RUF000487.t1	Chr1:3890396-3892444	-	P	1	9	134-P-P-P-137-P-P-P-P-P-P-38
RUF000511.t1	Chr1:4090291-4102172	+	P	12	11	706-P-P-P-35-P-P-P-P-P-P-P-P-24
RUF000550.t1	Chr1:4361780-4364098	-	DYW	1	16	15-P1-L1-S1-P1-L1-S1-SS-P1-L1-S1-P2-L2-S2-E1-E2-DYW
RUF000699.t1	Chr1:5635825-5640734	-	E2	6	16	43-P1-253-P1-33-S1-SS-P1-L1-S1-SS-P1-L1-S1-P2-L2-S2-E1-E2-47
RUF000745.t1	Chr1:6154770-6158045	-	DYW	1	26	90-L1-S1-P1-L1-S1-P1-L1-S1-P1-L1-S1-P1-L1-S1-P1-L1-S1-P1-L1-S1-P2-L2-S2-E1-E2-DYW
RUF000907.t2	Chr1:7557653-7560973	+	P	4	12	114-P-P-P-P-P-P-P-P-P-P-P-P-86
RUF001055.t1	Chr1:9056258-9057769	+	E2	1	11	74-L1-S1-SS-P1-L1-S1-P2-L2-S2-E1-E2-59
RUF001075.t1	Chr1:9193532-9197351	-	P	2	21	231-P-P-P-P-P-P-P-P-P-P-P-P-137-P-P-P-P-P-P-P-P-83-P
RUF001201.t1	Chr1:10272827-10276925	+	P	3	7	173-P-34-P-34-P-67-P-P-P-P-57
RUF001315.t1	Chr1:11310520-11312627	+	E2	2	15	2-SS-P1-L1-S1-P1-L1-S1-P1-L1-S1-P2-L2-S2-E1-E2-55
RUF001357.t1	Chr1:11794613-11799106	+	P	3	9	71-P-33-P-P-P-P-P-P-P-P-87
RUF001360.t1	Chr1:11805191-11809682	+	P	2	7	79-P-36-P-P-P-P-37-P-P-38
RUF001362.t1	Chr1:11816929-11821470	+	P	3	10	66-P-34-P-P-P-P-P-P-P-P-P-47
RUF001375.t1	Chr1:11925390-11927579	-	P	1	16	109-P-P-P-P-P-P-P-P-P-P-P-P-P-P-P-P-41
RUF001627.t1	Chr1:14674009-14677265	+	DYW	1	21	36-S1-P1-32-S1-P1-L1-S1-P1-L1-S1-P1-L1-S1-P1-L1-S1-P2-L2-S2-E1-E2-DYW
RUF001649.t1	Chr1:14956431-14959321	+	E2	2	21	79-S1-P1-L1-S1-P1-L1-S1-P1-L1-S1-P1-L1-S1-P1-L1-S1-P2-L2-S2-E1-E2-15
RUF001730.t1	Chr1:15736670-15742976	-	E+	5	20	11-L1-S1-P1-L1-S1-P1-L1-S1-P1-L1-S1-P1-L1-S1-P2-L2-S2-E1-E2-E+
RUF001774.t1	Chr1:16296336-16297593	-	E+	2	8	9-L1-S1-77-P2-L2-S2-E1-E2-E+
RUF001799.t2	Chr1:16799959-16804722	+	E2	3	19	7-L1-S1-SS-P1-L1-S1-SS-P1-L1-S1-SS-P1-L1-S1-P2-L2-S2-E1-E2-10
RUF001876.t1	Chr1:17914927-17916781	+	E2	2	7	13-L1-S1-P2-L2-S2-E1-E2-32
RUF002036.t1	Chr1:19846691-19848501	+	E2	1	16	8-L1-S1-P1-L1-S1-P1-L1-S1-P1-L1-S1-P2-L2-S2-E1-E2-12
RUF002039.t1	Chr1:19878645-19880001	-	P	1	4	138-P-32-P-P-P-32
RUF002040.t1	Chr1:19880175-19882453	+	P	1	10	174-P-P-P-P-P-35-P-P-P-P-P-37
RUF002107.t10	Chr1:20568357-20576429	+	P	11	9	84-P-34-P-71-P-P-P-P-P-P-P-143
RUF002304.t1	Chr1:22406395-22411356	-	E1	5	10	169-SS-SS-P1-L1-S1-SS-SS-44-L2-S2-E1-41
RUF002307.t1	Chr1:22417994-22422733	-	DYW	2	23	98-S1-P1-L1-S1-P1-40-S1-38-L1-S1-P1-L1-S1-P1-L1-S1-P1-L1-S1-P2-L2-S2-E1-E2-DYW
RUF002373.t1	Chr1:22922578-22926981	+	E2	4	22	59-L1-S1-P1-L1-S1-P1-L1-S1-P1-L1-S1-P1-L1-S1-P1-L1-S1-P2-L2-S2-E1-E2-25
RUF002433.t1	Chr1:23375424-23380646	+	PLS	2	14	74-L1-S1-P1-L1-S1-P1-L1-S1-P1-L1-S1-P1-70-L1-S1-157
RUF002459.t2	Chr1:23659654-23665355	-	P	3	18	147-P-P-35-P-P-P-P-P-P-P-P-P-P-P-P-P-P-P-P-30
RUF002492.t1	Chr1:23939558-23941036	+	P	1	4	154-P-P-44-P-P-39
RUF002671.t3	Chr1:25415208-25418493	+	E2	3	17	82-P1-L1-S1-P1-L1-S1-P1-L1-S1-P1-L1-S1-P2-L2-S2-E1-E2-9
RUF002698.t1	Chr1:25660254-25662420	+	DYW	2	9	5-P1-L1-S1-P2-L2-S2-E1-E2-DYW
RUF002832.t1	Chr1:26755176-26769305	-	P	7	8	101-P-P-33-P-P-P-P-32-P-P-410
RUF002848.t1	Chr1:26945810-26952912	+	P	10	10	475-P-P-P-P-P-P-P-P-P-P-117
RUF003138.t1	Chr1:29038214-29040380	+	DYW	1	14	L1-37-P1-L1-S1-SS-P1-L1-S1-P2-L2-S2-E1-E2-DYW
RUF003140.t1	Chr1:29043070-29044994	-	E2	1	16	18-S1-P1-L1-S1-SS-P1-L1-S1-P1-L1-S1-P2-L2-S2-E1-E2-55
RUF003287.t2	Chr1:29984780-29988289	+	DYW	2	8	400-P1-L1-S1-P2-L2-E1-E2-DYW
RUF003408.t1	Chr1:30883527-30886197	-	E1	2	14	11-P1-34-S1-P1-60-P1-L1-S1-P1-93-P1-L1-S1-P2-L2-S2-E1-2
RUF003492.t1	Chr1:31436596-31438044	-	E2	1	9	115-L1-S1-P1-L1-S1-P2-37-S2-E1-E2-27
RUF003604.t1	Chr1:32311742-32313796	+	P	1	18	42-P-P-P-P-P-P-P-P-P-P-P-P-P-P-P-P-P-P-18
RUF003643.t1	Chr1:32743384-32744706	+	E2	1	11	45-L1-S1-SS-P1-L1-S1-P2-L2-S2-E1-E2-21
RUF003683.t1	Chr1:33039598-33042922	+	DYW	3	12	57-S1-P1-L1-S1-P1-L1-S1-P2-35-S2-E1-E2-DYW
RUF003692.t1	Chr1:33089557-33093647	-	E2	2	17	L1-S1-P1-L1-S1-P1-L1-S1-SS-P1-L1-S1-P2-L2-S2-E1-E2-10
RUF003693.t1	Chr1:33091996-33093579	-	E2	1	13	27-S1-P1-L1-S1-SS-P1-L1-S1-P2-L2-S2-E1-E2-10
RUF003694.t1	Chr1:33093775-33095361	+	P	1	8	144-P-P-P-P-P-P-P-67-P-38
RUF003710.t1	Chr1:33238120-33239184	-	E2	1	8	12-P1-L1-S1-P2-L2-S2-E1-E2-66
RUF003722.t1	Chr1:33355004-33357463	+	DYW	1	15	22-P1-L1-S1-P1-L1-S1-P1-L1-S1-P2-L2-S2-E1-E2-DYW
RUF003813.t1	Chr1:34017503-34027134	+	P	10	14	450-P-550-P-P-P-P-P-P-P-P-P-P-P-P-P-74
RUF003865.t1	Chr1:34394680-34400154	+	E2	8	13	145-S1-P1-L1-S1-SS-P1-L1-S1-P2-L2-S2-E1-E2-47
RUF003922.t1	Chr1:34842981-34845250	-	DYW	1	14	77-L1-S1-P1-L1-S1-P1-L1-S1-P2-L2-S2-E1-E2-DYW
RUF003951.t1	Chr1:35095879-35099432	+	P	2	16	118-P-P-P-P-P-P-P-P-P-P-P-P-P-P-P-P-19
RUF004142.t1	Chr1:36553183-36555115	-	E2	1	13	54-L1-S1-SS-SS-SS-SS-P1-L1-S1-P2-35-S2-E1-E2-27
RUF004172.t1	Chr1:36750974-36752821	+	DYW	2	9	8-P1-34-S1-P1-L1-S1-P2-E1-E2-DYW
RUF004256.t1	Chr1:37314358-37316544	+	P	1	8	222-P-P-P-36-P-P-P-P-P-25
RUF004332.t1	Chr1:37907004-37908653	+	P	1	8	235-P-P-P-P-P-P-P-P-31
RUF004365.t1	Chr1:38143407-38146365	-	E2	3	14	45-P1-L1-S1-SS-SS-SS-P1-L1-S1-P2-L2-S2-E1-E2-21
RUF004369.t1	Chr1:38163635-38167594	-	E2	5	17	120-P1-L1-S1-P1-L1-S1-P1-L1-S1-P1-L1-S1-P2-L2-S2-E1-E2-68
RUF004371.t1	Chr1:38172941-38174767	+	P	1	9	114-P-P-P-P-34-P-P-P-P-P-24
RUF004377.t1	Chr1:38195737-38198754	-	E2	2	13	9-L1-S1-SS-SS-SS-P1-L1-S1-P2-L2-S2-E1-E2-50
RUF004565.t1	Chr1:39639521-39642482	+	E2	1	23	97-S1-P1-L1-S1-P1-L1-S1-P1-L1-S1-36-L1-S1-P1-L1-S1-P1-L1-S1-P2-L2-S2-E1-E2-8
RUF004695.t1	Chr1:40655784-40658323	+	DYW	2	19	42-SS-P1-L1-S1-P1-L1-S1-P1-L1-S1-P1-L1-S1-P2-L2-S2-E1-E2-DYW
RUF004777.t1	Chr1:41170711-41172806	-	P	1	8	206-P-P-37-P-P-P-P-P-32-P-17
RUF004782.t1	Chr1:41198426-41205525	-	E2	7	15	505-S1-P1-L1-S1-P1-L1-S1-P1-L1-S1-P2-L2-S2-E1-E2-14
RUF004823.t1	Chr1:41466805-41469236	+	DYW	1	19	38-S1-P1-L1-S1-P1-L1-S1-P1-L1-S1-P1-L1-S1-P2-L2-S2-E1-E2-DYW
RUF004886.t1	Chr2:325106-327361	-	DYW	1	19	11-L1-S1-SS-P1-L1-S1-SS-P1-L1-S1-P1-L1-S1-P2-L2-S2-E1-E2-DYW
RUF004921.t1	Chr2:526633-529308	-	P	1	15	99-P-P-P-P-P-P-P-P-37-P-P-P-P-P-P-32-P-45
RUF004948.t1	Chr2:762996-768679	-	E2	8	8	5-P1-L1-S1-P2-L2-S2-E1-E2-396
RUF004960.t1	Chr2:852691-855237	-	P	2	6	209-P-34-P-37-P-P-P-P-17
RUF004974.t1	Chr2:956565-957971	-	P	1	6	102-P-36-P-P-P-P-P-19
RUF004991.t1	Chr2:1071671-1074263	+	P	1	14	48-P-P-40-P-P-P-P-P-P-P-P-P-P-32-P-P-3
RUF005025.t1	Chr2:1311156-1313283	+	E2	2	8	105-S1-35-L1-S1-P2-L2-S2-E1-E2-11
RUF005031.t1	Chr2:1350785-1353900	+	P	1	16	183-P-30-P-P-30-P-P-P-P-P-P-P-P-P-P-P-75-P-P-23
RUF005061.t1	Chr2:1589861-1594197	-	P	6	18	114-P-P-27-P-P-P-P-P-P-P-P-P-P-P-P-P-P-P-P-74
RUF005065.t1	Chr2:1634501-1642818	-	P	17	8	204-P-104-P-37-P-35-P-P-32-P-P-105-P-93
RUF005171.t1	Chr2:2476572-2479357	+	DYW	1	23	33-SS-31-SS-SS-SS-P1-L1-S1-SS-SS-SS-P1-L1-S1-SS-P1-L1-S1-P2-L2-S2-E1-E2-DYW
RUF005238.t2	Chr2:3057299-3061015	+	E2	3	11	257-P1-L1-S1-P1-L1-S1-P2-L2-S2-E1-E2-17
RUF005253.t1	Chr2:3206925-3209848	-	E2	1	20	42-S1-SS-36-L1-S1-P1-L1-S1-SS-SS-P1-L1-S1-P1-L1-S1-P2-L2-S2-E1-E2-78
RUF005437.t1	Chr2:4652525-4655716	+	DYW	3	17	36-S1-P1-39-S1-SS-P1-L1-S1-SS-P1-L1-S1-P2-L2-S2-E1-E2-DYW
RUF005719.t1	Chr2:7036021-7046472	+	P	11	13	138-P-32-P-P-P-P-P-P-P-P-P-P-P-P-323
RUF005942.t1	Chr2:9192658-9196555	+	P	3	14	122-P-P-P-P-P-P-P-P-P-P-P-P-P-P-17
RUF006046.t1	Chr2:10345464-10346924	+	E2	2	6	8-S1-P2-L2-S2-E1-E2-156
RUF006133.t1	Chr2:11314713-11317574	+	P	2	11	140-P-P-P-P-P-P-P-P-P-P-P-12
RUF006243.t1	Chr2:12365179-12372552	-	P	5	12	55-P-P-P-P-P-P-P-P-P-P-P-P-66
RUF006468.t1	Chr2:15641622-15643352	+	P	1	8	191-P-P-P-P-P-P-P-P-31
RUF006469.t1	Chr2:15665905-15667793	-	E2	1	16	51-L1-S1-P1-L1-S1-P1-L1-S1-P1-L1-S1-P2-L2-S2-E1-E2-11
RUF006478.t1	Chr2:15759266-15762050	-	P	2	17	53-P-P-P-P-P-P-P-P-P-P-P-P-P-P-P-P-P-17
RUF006808.t1	Chr2:19325983-19328385	-	E1	2	16	35-S1-P1-L1-S1-P1-L1-S1-P1-L1-75-S1-70-P1-L1-S1-P2-L2-33-E1-1
RUF006940.t1	Chr2:20718707-20726340	+	E+	15	11	665-S1-SS-P1-L1-S1-P2-L2-S2-E1-E2-E+
RUF006956.t1	Chr2:20876675-20878465	+	E2	1	13	28-L1-65-P1-L1-S1-SS-P1-L1-S1-P2-L2-S2-E1-E2-53
RUF007019.t1	Chr2:21358964-21361842	+	P	4	11	66-P-26-P-P-P-P-P-P-P-P-P-P-34
RUF007128.t1	Chr2:22330532-22333391	-	P	1	18	152-P-P-P-P-P-P-P-P-P-P-P-P-P-P-P-35-P-P-P-15
RUF007254.t1	Chr2:23290024-23292108	+	P	2	8	115-P-P-34-P-P-P-P-P-37-P-34
RUF007343.t1	Chr2:23787786-23791500	+	P	2	8	238-P-P-P-P-P-P-P-34-P-25
RUF007418.t1	Chr2:24397157-24400674	-	E2	4	14	6-L1-S1-P1-L1-S1-SS-P1-L1-S1-P2-L2-S2-E1-E2-48
RUF007444.t1	Chr2:24630482-24631963	+	E2	1	12	70-L1-S1-SS-SS-P1-L1-S1-P2-L2-S2-E1-E2-20
RUF007492.t1	Chr2:25122061-25123891	+	P	1	7	139-P-P-P-P-P-P-P-70
RUF007672.t1	Chr2:26509260-26516209	-	E2	5	18	820-S1-P1-L1-S1-P1-L1-S1-P1-L1-S1-P1-L1-S1-P2-L2-S2-E1-E2-285
RUF007722.t1	Chr2:26823748-26828379	-	E2	5	18	119-S1-P1-L1-S1-SS-54-P1-L1-S1-P1-L1-S1-P1-35-S1-P2-L2-S2-E1-E2-83
RUF007784.t1	Chr2:27342959-27345696	-	P	2	8	197-P-P-P-P-P-P-P-P-139
RUF007792.t1	Chr2:27380248-27382831	+	E2	1	15	59-SS-P1-L1-S1-P1-L1-S1-41-SS-SS-40-SS-P2-L2-S2-E1-E2-58
RUF007899.t1	Chr2:28260329-28262406	-	DYW	2	12	27-L1-35-P1-L1-S1-P1-L1-S1-P2-36-S2-E1-E2-DYW
RUF007932.t1	Chr2:28523171-28527456	+	P	2	8	146-P-P-P-79-P-P-P-34-P-P-246
RUF007999.t1	Chr2:29065472-29067525	-	P	1	7	105-P-33-P-P-76-P-P-P-P-30
RUF008147.t1	Chr2:30054235-30055701	-	E2	1	11	59-L1-S1-SS-P1-L1-S1-P2-L2-S2-E1-E2-55
RUF008181.t1	Chr2:30326392-30328787	+	PLS	1	15	40-P1-L1-S1-P1-L1-S1-P1-L1-S1-P1-L1-S1-P1-L1-S1-15
RUF008284.t1	Chr2:31120233-31122588	+	P	2	10	84-P-P-P-P-P-P-P-P-P-P-55
RUF008350.t3	Chr2:31550549-31553593	+	P	2	8	220-P-P-P-P-P-P-P-P-53
RUF008423.t1	Chr2:32027672-32029255	-	E2	1	9	138-SS-31-P1-L1-S1-P2-L2-S2-E1-E2-55
RUF008614.t1	Chr2:33567000-33570355	+	P	3	12	22-P-P-P-P-P-P-P-P-P-P-P-P-35
RUF008638.t1	Chr2:33717410-33719998	-	P	3	7	43-P-P-P-P-35-P-P-P-87
RUF008792.t1	Chr2:34807213-34811297	+	E1	6	14	50-P1-L1-S1-P1-L1-S1-SS-P1-L1-S1-P2-L2-S2-E1-205
RUF008832.t1	Chr2:35097711-35100989	-	P	3	20	13-P-51-P-34-P-P-P-P-P-P-P-P-P-P-P-P-P-P-35-P-P-P-P-23
RUF008856.t2	Chr2:35239558-35244620	-	P	9	12	250-P-P-P-P-P-P-P-P-P-P-P-P-51
RUF008870.t1	Chr2:35336474-35338420	-	P	1	6	114-P-32-P-41-P-P-P-P-20
RUF008874.t1	Chr2:35349424-35351145	+	E2	1	11	79-L1-S1-SS-P1-L1-S1-P2-L2-S2-E1-E2-41
RUF008903.t1	Chr2:35485915-35495495	+	E1	13	15	58-S1-73-S1-P1-L1-S1-P1-L1-S1-P1-L1-S1-P2-L2-S2-E1-527
RUF009037.t3	Chr3:849013-852000	-	P	4	9	88-P-P-P-P-P-P-P-P-P-44
RUF009063.t1	Chr3:1044499-1072696	+	P	48	6	1892-P-P-P-P-P-P-39
RUF009148.t1	Chr3:1812765-1818704	-	DYW	4	18	327-P1-L1-S1-P1-L1-S1-P1-L1-S1-P1-L1-S1-P2-L2-S2-E1-E2-DYW
RUF009301.t1	Chr3:2951625-2953364	+	E2	1	9	95-L1-S1-35-L1-S1-P2-L2-S2-E1-E2-54
RUF009308.t4	Chr3:2981597-2985709	+	P	3	7	95-P-P-P-P-70-P-P-P
RUF009330.t3	Chr3:3166301-3184774	+	P	26	15	140-P-P-P-P-P-P-P-P-P-P-P-P-P-P-P-1001
RUF009348.t1	Chr3:3253823-3256302	-	P	1	16	85-P-P-P-P-P-P-P-P-P-P-P-P-P-P-P-P-3
RUF009375.t6	Chr3:3429146-3435291	+	P	7	25	188-P-P-P-P-P-P-P-P-P-136-P-P-P-P-P-33-P-P-P-P-P-P-P-P-P-P-P-143
RUF009377.t1	Chr3:3439338-3441053	-	E2	1	15	4-L1-S1-P1-L1-S1-SS-SS-P1-L1-S1-P2-L2-S2-E1-E2-32
RUF009383.t1	Chr3:3462569-3464515	+	E2	3	8	165-P1-L1-S1-P2-L2-S2-E1-E2-15
RUF009498.t1	Chr3:4149087-4153406	-	E2	6	10	61-P1-29-L1-S1-P1-33-S1-P2-L2-S2-E1-E2-137
RUF009618.t1	Chr3:5018191-5020947	+	P	1	15	207-P-P-P-P-P-P-P-P-P-P-P-P-P-P-36-P-27
RUF009671.t1	Chr3:5386629-5388713	+	P	2	7	184-P-31-P-P-P-P-P-P-71
RUF009696.t1	Chr3:5534274-5537152	+	P	2	12	151-P-P-P-P-P-P-P-P-P-P-P-P-15
RUF009725.t1	Chr3:5826066-5828321	-	P	1	10	148-P-P-P-P-P-P-P-P-P-66-P-109
RUF009728.t2	Chr3:5851889-5853795	+	P	2	10	50-P-30-P-35-P-P-P-P-P-P-P-P-71
RUF009729.t1	Chr3:5855337-5856708	-	E2	1	10	7-P1-L1-S1-P1-L1-S1-P2-L2-S2-37-E2-9
RUF009787.t1	Chr3:6297660-6299884	-	P	1	8	119-P-32-P-P-P-P-P-P-P-35
RUF009850.t1	Chr3:6878112-6880475	-	DYW	2	13	93-SS-P1-L1-S1-P1-L1-S1-P2-L2-S2-E1-E2-DYW
RUF009895.t1	Chr3:7166801-7168871	-	DYW	1	14	53-S1-P1-L1-S1-SS-38-P1-L1-S1-P2-L2-S2-E1-E2-DYW
RUF010168.t1	Chr3:9193906-9205805	-	E2	14	15	331-L1-S1-71-S1-P1-L1-S1-SS-P1-L1-S1-P2-L2-S2-E1-E2-465
RUF010179.t1	Chr3:9266232-9290308	-	P	12	8	211-P-33-P-39-P-P-P-32-P-35-P-P-186
RUF010298.t1	Chr3:10084887-10087712	+	DYW	2	13	15-P1-L1-S1-SS-P1-L1-S1-P2-L2-S2-E1-E2-DYW
RUF010360.t1	Chr3:10519780-10525469	+	P	3	10	140-P-P-P-P-P-P-P-P-P-P-38
RUF010391.t1	Chr3:10734322-10736411	+	E2	1	17	L1-67-L1-S1-SS-SS-P1-L1-S1-SS-P1-L1-S1-P2-L2-S2-E1-E2-13
RUF010408.t2	Chr3:10902577-10905096	+	DYW	2	16	47-SS-33-SS-SS-SS-SS-SS-SS-P1-L1-S1-P2-L2-S2-E1-E2-DYW
RUF010545.t1	Chr3:11896567-11898980	+	P	1	10	127-P-P-P-P-P-P-P-P-35-P-P-26
RUF010720.t1	Chr3:13468459-13470153	-	P	1	10	184-P-P-P-P-P-P-P-P-P-P-30
RUF010773.t1	Chr3:13825526-13831932	+	E2	4	13	224-S1-P1-L1-S1-SS-P1-L1-S1-P2-L2-S2-E1-E2-10
RUF010950.t1	Chr3:15446079-15448652	-	E+	2	18	31-P1-L1-S1-P1-L1-S1-P1-L1-S1-P1-L1-S1-P2-L2-S2-E1-E2-E+
RUF010974.t1	Chr3:15654781-15659633	-	P	9	5	212-P-P-P-P-P-309
RUF011169.t2	Chr3:17867234-17872296	+	PLS	4	15	8-L1-S1-SS-P1-L1-S1-P1-L1-S1-P1-L1-S1-P2-L2-S2-108
RUF011199.t1	Chr3:18185167-18193710	-	E+	8	20	58-L1-S1-P1-L1-S1-P1-L1-S1-P1-L1-S1-P1-L1-S1-P2-L2-S2-E1-E2-E+
RUF011308.t1	Chr3:20265816-20268933	+	P	1	16	46-P-29-P-P-P-P-P-P-P-P-P-P-P-P-P-P-P-9
RUF011373.t1	Chr3:21042255-21044458	-	DYW	1	14	69-L1-S1-P1-L1-S1-P1-L1-S1-P2-L2-S2-E1-E2-DYW
RUF011443.t1	Chr3:21722209-21724437	-	P	1	17	73-P-37-P-P-P-P-P-P-P-P-P-P-P-P-P-P-P-33-P-3
RUF011456.t1	Chr3:21848470-21857529	+	DYW	2	21	27-L1-S1-P1-L1-S1-P1-L1-S1-SS-P1-L1-S1-P1-L1-S1-P2-L2-S2-E1-E2-DYW
RUF011463.t2	Chr3:21927251-21931709	-	E2	3	14	68-L1-S1-P1-L1-S1-SS-P1-L1-S1-P2-L2-S2-E1-E2-30
RUF011502.t1	Chr3:22422683-22427325	+	P	3	28	107-P-P-P-P-P-P-P-P-P-P-P-P-P-P-P-P-P-P-P-P-P-P-P-P-P-P-P-P-30
RUF011588.t1	Chr3:23543940-23545289	+	E2	1	11	34-SS-P1-L1-S1-31-L1-S1-P2-L2-S2-E1-E2-11
RUF011636.t1	Chr3:23990379-23996314	-	E1	4	12	133-L1-32-P1-L1-S1-SS-P1-L1-S1-P2-L2-S2-E1-52
RUF011690.t1	Chr3:24616880-24619485	-	PLS	1	15	114-S1-P1-L1-S1-P1-L1-S1-P1-L1-S1-P1-L1-S1-P1-L1
RUF012073.t1	Chr3:27898773-27906485	+	E2	3	19	77-L1-35-SS-SS-P1-L1-S1-SS-P1-L1-S1-SS-P1-L1-S1-P2-L2-S2-E1-E2-42
RUF012148.t1	Chr3:28527454-28532424	+	P	2	14	206-P-33-P-P-P-P-P-P-P-P-99-P-P-P-P-P-22
RUF012261.t1	Chr3:29452804-29454875	+	P	1	10	160-P-P-P-P-P-P-P-P-P-P-90
RUF012296.t1	Chr3:29691369-29699113	-	E2	9	9	437-L1-S1-35-L1-S1-P2-L2-S2-E1-E2-54
RUF012300.t1	Chr3:29778479-29795117	+	E2	17	13	127-L1-S1-P1-L1-S1-SS-35-L1-S1-P2-L2-S2-E1-E2-493
RUF012326.t1	Chr3:29953045-29954709	+	P	1	10	165-P-P-P-P-P-P-P-P-P-P-40
RUF012437.t1	Chr3:30760583-30762501	+	P	2	11	P-65-P-P-P-P-P-P-P-P-P-P-37
RUF012522.t1	Chr3:31412369-31414963	-	DYW	1	20	25-L1-S1-SS-P1-L1-S1-SS-P1-L1-S1-SS-P1-L1-S1-P2-L2-S2-E1-E2-DYW
RUF012556.t1	Chr3:31623580-31627865	+	E2	3	21	38-L1-S1-40-L1-S1-P1-L1-S1-P1-L1-S1-P1-L1-S1-P1-L1-S1-P2-L2-S2-E1-E2-66
RUF012566.t1	Chr3:31675887-31678437	-	P	2	8	124-P-36-P-P-69-P-P-P-P-P-40
RUF012654.t1	Chr3:32331396-32333992	+	DYW	2	10	P1-L1-S1-P1-L1-S1-P2-E1-E2-DYW
RUF012656.t1	Chr3:32344428-32346338	+	P	1	15	5-P-P-36-P-P-P-P-P-P-P-P-P-P-P-P-35-P-40
RUF012753.t1	Chr3:33023687-33027385	-	DYW	2	20	81-S1-P1-L1-S1-SS-SS-P1-L1-S1-SS-SS-P1-L1-S1-P2-L2-S2-E1-E2-DYW
RUF012817.t1	Chr3:33458395-33465582	+	DYW	6	14	481-SS-SS-P1-L1-S1-P1-L1-S1-P2-L2-S2-E1-E2-DYW
RUF012851.t1	Chr3:33718037-33721613	-	DYW	2	11	125-L1-S1-P1-L1-S1-P2-L2-S2-E1-E2-DYW
RUF012869.t2	Chr3:33825464-33830147	-	P	5	14	102-P-36-P-42-P-P-P-P-P-P-P-P-P-P-P-36-P-167
RUF012986.t1	Chr3:34532477-34561467	-	E+	23	20	876-L1-S1-P1-L1-S1-P1-L1-S1-P1-L1-S1-P1-L1-S1-P2-L2-S2-E1-E2-E+
RUF013013.t1	Chr3:34688258-34690397	+	E2	1	17	47-SS-P1-L1-S1-P1-L1-S1-P1-32-S1-P1-L1-S1-P2-L2-S2-E1-E2-54
RUF013053.t1	Chr3:34904468-34907673	+	E1	4	17	40-SS-31-SS-P1-L1-S1-SS-P1-L1-S1-SS-P1-L1-S1-P2-L2-S2-E1-151
RUF013078.t1	Chr3:35046230-35051437	-	E1	5	11	7-P1-L1-S1-SS-P1-L1-S1-P2-L2-S2-E1-243
RUF013084.t1	Chr3:35070107-35071698	-	E2	1	12	106-S1-P1-L1-S1-P1-L1-S1-P2-L2-S2-E1-E2-2
RUF013110.t1	Chr3:35245212-35249615	+	P	2	10	141-P-P-P-P-P-P-P-P-P-66-P-109
RUF013147.t1	Chr3:35535539-35537461	+	PLS	1	18	8-P1-L1-S1-P1-L1-S1-P1-L1-S1-P1-L1-S1-P1-L1-S1-P2-L2-S2-14
RUF013185.t1	Chr4:488126-491014	+	E2	2	10	219-L1-S1-P1-L1-S1-P2-L2-S2-E1-E2-53
RUF013218.t1	Chr4:1053833-1055926	+	P	2	6	300-P-P-P-P-P-P-61
RUF013235.t1	Chr4:1218739-1221062	-	P	1	9	234-P-34-P-45-P-P-P-P-P-P-P-42
RUF013243.t1	Chr4:1310097-1313933	+	P	2	7	132-P-P-P-P-P-P-P-12
RUF013276.t3	Chr4:1596125-1598490	+	E2	2	11	45-L1-S1-SS-P1-L1-S1-P2-L2-S2-E1-E2-21
RUF013291.t2	Chr4:1848041-1850653	-	P	2	10	102-P-P-P-P-P-P-P-P-P-P-79
RUF013296.t1	Chr4:1879076-1881318	+	P	1	10	153-P-P-P-P-P-P-P-P-P-P-37
RUF013365.t1	Chr4:2810752-2829333	-	E2	14	13	723-S1-P1-L1-S1-SS-P1-L1-S1-P2-L2-S2-E1-E2-43
RUF013409.t1	Chr4:3298550-3301465	+	DYW	1	20	56-L1-S1-P1-L1-S1-P1-L1-S1-P1-L1-S1-P1-L1-S1-P2-L2-S2-E1-E2-DYW
RUF013962.t1	Chr4:11659584-11660513	+	PLS	1	6	51-P1-39-S1-P1-L1-S1-P1-17
RUF014104.t1	Chr4:13732570-13735800	+	P	2	10	50-P-33-P-P-P-P-P-P-38-P-P-P-47
RUF014225.t1	Chr4:15264934-15267530	+	P	1	16	121-P-P-P-P-P-P-P-P-P-P-P-P-P-P-P-P-66
RUF014227.t1	Chr4:15288422-15293789	+	P	3	16	117-P-P-P-P-P-P-P-P-P-P-P-P-P-P-P-P-357
RUF014235.t1	Chr4:15360075-15362310	-	P	1	15	47-P-P-P-P-P-P-35-P-P-P-P-P-P-P-P-P-72
RUF014242.t1	Chr4:15443306-15460032	-	E2	26	17	1055-S1-P1-L1-S1-70-L1-S1-SS-SS-SS-P1-L1-S1-P2-L2-S2-E1-E2-71
RUF014521.t1	Chr4:18606819-18608669	+	E2	1	9	132-S1-SS-P1-35-S1-P2-L2-S2-E1-E2-19
RUF014614.t1	Chr4:19336003-19341477	+	E2	5	14	5-L1-64-L1-S1-SS-SS-SS-P1-L1-S1-P2-L2-S2-E1-E2-9
RUF014711.t1	Chr4:20274120-20276501	-	E2	2	17	33-SS-SS-SS-SS-SS-SS-SS-SS-SS-SS-31-L1-S1-P2-L2-S2-E1-E2-44
RUF014732.t1	Chr4:20476516-20478627	-	E2	1	17	49-S1-SS-P1-L1-S1-P1-L1-S1-SS-P1-L1-S1-P2-L2-S2-E1-E2-62
RUF014736.t1	Chr4:20499253-20501690	-	E1	1	17	86-SS-35-L1-S1-P1-L1-S1-SS-P1-L1-S1-P1-L1-S1-P2-L2-S2-E1-27
RUF014810.t1	Chr4:21050404-21052826	-	P	2	11	143-P-36-P-P-P-P-P-P-P-P-P-P-16
RUF014818.t1	Chr4:21084648-21086655	+	P	1	13	70-P-29-P-P-P-P-P-P-P-P-P-P-34-P-P-17
RUF014847.t1	Chr4:21246208-21248646	+	P	2	6	107-P-34-P-P-P-71-P-P-7
RUF014939.t1	Chr4:21858457-21861767	+	P	3	11	172-P-32-P-P-P-P-P-P-P-P-P-P-20
RUF014942.t1	Chr4:21877012-21885329	-	E2	7	18	71-P1-L1-S1-P1-L1-S1-SS-35-P1-L1-S1-P1-L1-S1-P2-L2-S2-E1-E2-410
RUF014944.t1	Chr4:21890174-21890662	-	P	1	4	1-P-P-P-P-20
RUF014979.t1	Chr4:22178722-22181925	-	DYW	1	22	65-L1-S1-P1-L1-S1-P1-34-S1-P1-L1-S1-P1-L1-S1-P1-L1-S1-P2-L2-S2-E1-E2-DYW
RUF015020.t1	Chr4:22499760-22503251	-	P	3	12	77-P-P-P-P-P-P-P-P-35-P-P-P-P-4
RUF015030.t1	Chr4:22571239-22578022	-	P	7	11	523-P-P-P-P-P-P-P-P-P-P-P-32
RUF015250.t3	Chr4:24158876-24163627	-	E2	3	25	90-S1-P1-L1-S1-SS-35-P1-L1-S1-P1-L1-S1-P1-L1-S1-P1-L1-S1-P1-L1-S1-P2-L2-S2-E1-E2-59
RUF015291.t2	Chr4:24532651-24539464	+	P	3	9	80-P-P-P-P-P-36-P-P-P-P-30
RUF015463.t1	Chr4:25685045-25687922	-	P	2	10	106-P-35-P-P-P-P-P-P-P-P-P-15
RUF015724.t1	Chr4:27881672-27887191	+	P	3	13	81-P-37-P-P-P-P-P-P-P-P-P-P-P-P-32
RUF015739.t1	Chr4:27964327-27966943	-	DYW	1	22	3-L1-S1-SS-P1-L1-S1-SS-P1-L1-S1-P1-L1-S1-SS-P1-L1-S1-P2-36-S2-E1-E2-DYW
RUF015870.t1	Chr4:28802888-28805467	+	E2	2	17	66-P1-L1-S1-P1-36-S1-P1-L1-S1-P1-L1-S1-P1-L1-S1-P1-68-E1-E2-13
RUF015953.t1	Chr4:29477267-29479987	-	P	1	10	239-P-P-P-P-P-P-P-P-P-107-P-136
RUF015996.t1	Chr4:29828844-29831509	+	P	4	7	70-P-36-P-P-P-P-P-P-41
RUF016085.t1	Chr4:30578325-30584978	+	E2	5	16	10-L1-S1-P1-L1-S1-P1-L1-S1-P1-L1-S1-P2-L2-S2-E1-E2-257
RUF016173.t1	Chr4:31258216-31260062	+	P	1	7	106-P-35-P-P-P-P-32-P-P-24
RUF016334.t1	Chr4:32394799-32402157	-	PLS	4	14	53-S1-P1-36-S1-P1-L1-S1-P1-L1-S1-P1-L1-S1-P2-L2-851
RUF016363.t1	Chr4:32574189-32575975	-	P	1	12	52-P-P-P-35-P-P-P-P-P-P-P-P-P-36
RUF016366.t1	Chr4:32591397-32593213	-	PLS	1	13	36-L1-S1-P1-L1-S1-35-L1-S1-P1-L1-S1-P2-L2-S2-3
RUF016441.t1	Chr4:33067749-33079523	+	P	12	15	262-P-P-P-P-P-P-P-P-P-P-P-P-P-P-P-113
RUF016457.t2	Chr4:33196947-33200733	-	E+	4	17	3-L1-S1-P1-L1-S1-P1-L1-S1-P1-L1-S1-P2-L2-S2-E1-E2-E+
RUF016552.t1	Chr5:386369-388470	-	E2	2	11	131-L1-S1-SS-P1-L1-S1-P2-L2-S2-E1-E2-52
RUF016595.t1	Chr5:701103-702923	+	E2	1	12	56-SS-SS-SS-SS-SS-P1-32-S1-P2-L2-S2-E1-E2-52
RUF016732.t1	Chr5:2013200-2017726	+	P	2	16	50-P-P-P-P-P-P-P-P-P-P-P-P-P-P-P-P-31
RUF016823.t1	Chr5:2734429-2751636	-	P	24	6	605-P-P-P-P-76-P-P-121
RUF016840.t1	Chr5:2845173-2846948	+	E2	1	16	10-L1-S1-P1-L1-S1-P1-L1-S1-P1-L1-S1-P2-L2-S2-E1-E2-31
RUF016889.t1	Chr5:3153170-3154742	+	E2	1	12	17-L1-S1-P1-L1-S1-P1-L1-S1-P2-37-S2-E1-E2-46
RUF017028.t1	Chr5:4435355-4443598	-	E2	3	16	150-L1-30-P1-L1-S1-SS-P1-L1-S1-P1-L1-S1-P2-L2-S2-E1-E2-57
RUF017220.t1	Chr5:6534081-6535970	+	P	1	7	87-P-33-P-36-P-P-P-P-P-64
RUF017254.t1	Chr5:6825080-6834517	+	DYW	2	17	40-L1-S1-P1-37-S1-P1-L1-S1-P1-L1-S1-60-S1-P2-L2-S2-E1-E2-DYW
RUF017564.t1	Chr5:10622596-10624321	+	E2	1	12	71-P1-L1-S1-SS-P1-L1-S1-P2-L2-S2-E1-E2-10
RUF017580.t1	Chr5:10858323-10862292	-	P	2	16	109-P-P-P-71-P-P-P-P-P-P-P-35-P-P-P-P-P-P-18
RUF017581.t1	Chr5:10865592-10869076	-	P	2	22	99-P-P-P-P-P-P-P-P-P-P-P-P-P-P-P-P-26-P-P-P-P-P-P-30
RUF017639.t1	Chr5:12090976-12093646	-	P	2	11	213-P-54-P-P-35-P-P-P-P-P-P-P-P-68
RUF017713.t1	Chr5:12921969-12924623	-	DYW	1	21	27-L1-S1-P1-L1-S1-P1-L1-S1-SS-P1-L1-S1-P1-L1-S1-P2-L2-S2-E1-E2-DYW
RUF017733.t1	Chr5:13307430-13308789	+	E2	2	11	P1-L1-S1-P1-L1-S1-P2-L2-S2-E1-E2-52
RUF017735.t1	Chr5:13320185-13324948	-	P	6	17	174-P-P-P-P-P-P-36-P-P-P-P-P-P-P-P-P-P-P-180
RUF017741.t3	Chr5:13375061-13383156	-	P	10	9	263-P-P-P-P-P-P-P-P-P-273
RUF017950.t1	Chr5:15590404-15592728	+	P	1	10	216-P-P-P-P-P-P-P-P-P-P-63
RUF018011.t1	Chr5:16318565-16325566	+	P	5	12	465-P-P-P-P-P-P-P-P-P-P-P-P-334
RUF018048.t1	Chr5:16650640-16651688	-	DYW	1	7	12-S1-P2-L2-S2-E1-E2-DYW
RUF018052.t1	Chr5:16662257-16664248	-	DYW	1	16	18-L1-S1-SS-P1-L1-S1-SS-P1-L1-S1-P2-L2-S2-E1-E2-DYW
RUF018056.t1	Chr5:16694576-16696570	-	DYW	2	14	59-SS-P1-L1-S1-SS-P1-L1-S1-P2-L2-S2-E1-E2-DYW
RUF018058.t1	Chr5:16706551-16708938	-	DYW	1	16	18-L1-S1-SS-P1-L1-S1-SS-P1-L1-S1-P2-L2-S2-E1-E2-DYW
RUF018213.t1	Chr5:18069980-18071657	-	P	1	13	65-P-P-P-P-P-P-P-P-P-P-P-P-33-P-1
RUF018297.t2	Chr5:18814665-18819814	-	P	2	8	220-P-P-P-P-P-P-36-P-P-6
RUF018312.t1	Chr5:18933725-18938701	+	E2	2	10	9-L1-S1-P1-L1-S1-P2-L2-S2-E1-E2-19
RUF018377.t1	Chr5:19555082-19557395	-	E+	6	7	88-S1-36-L1-S1-SS-SS-63-L2-64-E+
RUF018496.t1	Chr5:20577132-20579087	-	E2	1	12	11-L1-31-P1-L1-S1-SS-P1-L1-S1-P2-37-S2-E1-E2-63
RUF018588.t1	Chr5:21390510-21393625	+	DYW	1	21	63-P1-L1-S1-P1-L1-S1-P1-L1-S1-P1-L1-S1-P1-L1-S1-P2-L2-S2-E1-E2-DYW
RUF018772.t3	Chr5:22633833-22637098	+	P	3	6	37-P-70-P-P-P-P-P-18
RUF019143.t1	Chr5:25328521-25330712	-	P	1	8	108-P-38-P-39-P-P-P-P-P-P-168
RUF019150.t1	Chr5:25375137-25378015	+	PLS	1	17	S1-P1-L1-S1-P1-L1-31-P1-L1-S1-P1-L1-31-P1-L1-S1-P1-L1-S1-142
RUF019239.t1	Chr5:25964556-25966334	+	P	2	9	94-P-P-P-P-P-P-P-P-P-36
RUF019430.t1	Chr5:27256121-27258211	-	DYW	1	17	7-L1-S1-P1-L1-S1-P1-L1-S1-P1-L1-S1-P2-L2-S2-E1-E2-DYW
RUF019446.t2	Chr5:27354186-27358183	+	DYW	2	19	130-S1-P1-L1-S1-P1-L1-S1-P1-L1-S1-P1-L1-S1-P2-L2-S2-E1-E2-DYW
RUF019488.t1	Chr5:27637266-27639987	+	E2	1	18	SS-P1-L1-S1-P1-L1-S1-P1-L1-S1-P1-L1-S1-P2-L2-S2-E1-E2-65
RUF019508.t1	Chr5:27772149-27776188	-	P	2	11	1-P-P-P-P-P-P-P-P-P-P-P-59
RUF019536.t1	Chr5:27958309-27961811	+	DYW	2	19	51-L1-S1-P1-L1-31-SS-P1-L1-S1-SS-SS-P1-L1-S1-P2-L2-S2-E1-E2-DYW
RUF019649.t1	Chr6:222529-226570	-	P	8	21	169-P-P-P-P-P-P-P-P-P-P-58-P-P-P-P-P-P-P-P-P-P-P-53
RUF019656.t1	Chr6:268928-271587	+	DYW	2	17	58-L1-S1-P1-L1-S1-P1-L1-S1-P1-L1-S1-P2-L2-S2-E1-E2-DYW
RUF019677.t1	Chr6:440072-441707	+	E2	1	13	49-L1-S1-P1-L1-S1-P1-L1-S1-P2-L2-S2-E1-E2-25
RUF019756.t1	Chr6:1373909-1375637	+	P	1	9	107-P-P-P-P-P-P-P-P-P-64
RUF019760.t1	Chr6:1393532-1397252	+	E2	3	11	L1-86-S1-SS-P1-L1-S1-P2-L2-S2-E1-E2-53
RUF019886.t1	Chr6:2342685-2345798	+	E1	3	21	S1-P1-L1-S1-SS-SS-P1-L1-S1-SS-SS-SS-SS-SS-P1-L1-S1-P2-L2-S2-E1-41
RUF019965.t1	Chr6:2783619-2786958	+	P	2	16	116-P-P-P-P-P-P-P-P-P-P-P-P-P-P-P-P-2
RUF020110.t1	Chr6:3668784-3670814	+	P	3	10	123-P-P-P-P-P-P-P-P-P-P-36
RUF020177.t1	Chr6:4244090-4246944	-	P	2	5	192-P-P-35-P-P-P-32
RUF020182.t1	Chr6:4301758-4303788	+	E2	1	18	23-L1-S1-P1-L1-S1-P1-L1-S1-35-L1-S1-P1-L1-S1-P2-L2-S2-E1-E2-12
RUF020183.t1	Chr6:4304274-4307649	-	DYW	1	16	148-S1-P1-L1-S1-P1-L1-S1-P1-L1-S1-P2-L2-S2-E1-E2-DYW
RUF020270.t1	Chr6:4978890-4988526	-	P	8	24	655-P-37-P-P-P-P-P-P-P-P-31-P-38-P-P-P-P-P-P-P-P-P-P-P-P-P-P-81
RUF020385.t1	Chr6:5907287-5909147	-	E2	1	12	6-L1-S1-SS-SS-SS-P1-L1-S1-P2-L2-S2-39-E2-9
RUF020471.t1	Chr6:6680620-6682671	+	E2	1	18	35-SS-SS-SS-SS-SS-SS-SS-SS-SS-SS-P1-L1-S1-P2-L2-S2-E1-E2-44
RUF020488.t1	Chr6:6773224-6775302	-	E2	2	14	L1-S1-36-L1-S1-SS-SS-P1-L1-S1-P2-L2-S2-E1-E2-17
RUF020491.t1	Chr6:6779870-6781714	-	DYW	1	12	95-L1-S1-SS-P1-L1-S1-P2-L2-S2-E1-E2-DYW
RUF020601.t1	Chr6:7810770-7815657	-	P	4	12	135-P-P-P-P-P-P-P-P-P-P-P-P-42
RUF020951.t1	Chr6:11699711-11702689	-	E2	2	22	108-P1-L1-S1-P1-L1-S1-P1-L1-S1-P1-L1-S1-P1-L1-S1-P1-35-S1-P2-L2-S2-E1-E2-11
RUF021238.t1	Chr6:16147908-16150036	+	DYW	1	14	66-L1-S1-P1-L1-S1-P1-L1-S1-P2-L2-S2-E1-E2-DYW
RUF021327.t1	Chr6:17529947-17530504	+	E2	1	5	P2-L2-S2-E1-E2-25
RUF021356.t1	Chr6:17923507-17925913	-	E2	1	17	36-SS-37-L1-S1-P1-L1-S1-P1-L1-S1-P1-L1-S1-P2-L2-S2-E1-E2-25
RUF021381.t1	Chr6:18332345-18337788	-	P	2	11	206-P-P-P-P-P-P-P-P-P-P-P-52
RUF021426.t1	Chr6:18806292-18808592	+	E+	1	20	43-L1-S1-P1-L1-S1-P1-L1-S1-P1-L1-S1-P1-L1-S1-P2-L2-S2-E1-E2-E+
RUF021672.t1	Chr6:21912735-21914798	+	P	1	15	121-P-31-P-P-P-P-P-P-P-P-P-P-P-P-P-P-10
RUF021796.t1	Chr6:23308489-23310480	-	E2	1	15	13-P1-L1-S1-P1-L1-S1-SS-P1-L1-S1-P2-L2-S2-E1-E2-12
RUF021883.t1	Chr6:24081207-24083336	-	E2	1	13	37-L1-S1-P1-L1-S1-36-L1-S1-33-L1-S1-P2-36-S2-E1-E2-35
RUF021898.t1	Chr6:24225657-24228924	-	DYW	3	14	41-L1-S1-P1-L1-S1-P1-L1-S1-P2-L2-S2-E1-E2-DYW
RUF021974.t1	Chr6:24956415-24957692	-	E2	1	10	26-L1-S1-P1-L1-S1-P2-L2-S2-E1-E2-58
RUF022354.t1	Chr6:28155094-28155705	+	E2	1	5	12-P2-L2-S2-E1-E2-25
RUF022412.t1	Chr6:28497423-28500792	+	P	1	23	147-P-P-P-P-P-P-P-P-P-P-P-P-P-P-P-P-P-P-P-P-P-P-P-27
RUF022442.t1	Chr6:28692259-28694205	+	DYW	1	10	29-L1-112-S1-SS-P1-35-S1-36-L2-S2-E1-E2-DYW
RUF022445.t1	Chr6:28701731-28703683	-	P	1	8	162-P-P-P-P-P-P-P-P-42
RUF022489.t1	Chr6:29015330-29023841	+	E2	12	12	843-S1-P1-L1-S1-P1-L1-S1-P2-L2-S2-E1-E2-29
RUF022530.t1	Chr6:29407925-29416829	-	E+	12	17	60-S1-P1-37-S1-SS-P1-L1-S1-SS-P1-L1-S1-P2-L2-S2-E1-E2-E+
RUF022558.t1	Chr6:29565521-29569435	+	P	5	11	50-P-35-P-P-P-P-P-P-P-P-P-P-22
RUF022700.t1	Chr7:41835-44051	+	P	1	19	16-P-P-P-P-P-P-P-P-P-P-P-P-P-P-P-P-P-P-P-61
RUF022780.t1	Chr7:735491-744310	+	DYW	5	13	213-L1-31-P1-32-S1-SS-P1-L1-S1-P2-L2-S2-E1-E2-DYW
RUF022958.t1	Chr7:2518300-2523183	-	E+	4	12	11-L1-69-L1-S1-P1-L1-S1-P2-L2-S2-E1-E2-E+
RUF023051.t1	Chr7:3312959-3316088	-	DYW	1	12	145-L1-S1-SS-P1-L1-S1-P2-L2-S2-E1-E2-DYW
RUF023118.t1	Chr7:3755619-3758264	-	DYW	1	20	SS-P1-L1-S1-P1-L1-S1-SS-P1-L1-S1-P1-L1-S1-P2-L2-S2-E1-E2-DYW
RUF023153.t1	Chr7:4062051-4065169	+	P	2	12	159-P-36-P-P-P-P-P-P-35-P-35-P-P-P-P-42
RUF023258.t1	Chr7:4871966-4874037	+	DYW	1	12	26-P1-L1-S1-P1-L1-S1-P2-L2-S2-E1-E2-DYW
RUF023348.t1	Chr7:5549843-5551549	+	E2	1	15	48-S1-P1-L1-S1-P1-L1-S1-P1-L1-S1-P2-L2-S2-E1-E2-14
RUF023408.t1	Chr7:6196270-6205727	-	P	11	18	129-P-P-P-P-P-P-P-P-P-P-P-P-P-P-P-P-35-P-P-35
RUF023435.t1	Chr7:6632990-6635814	+	P	1	7	43-P-P-35-P-33-P-P-P-P-52
RUF023508.t1	Chr7:7467841-7476404	+	E+	8	17	39-S1-P1-L1-S1-SS-P1-L1-S1-P1-L1-S1-P2-L2-S2-E1-E2-E+
RUF023550.t1	Chr7:7918628-7928640	+	PLS	3	7	233-S1-39-L1-S1-P1-L1-S1-P1-13
RUF023583.t1	Chr7:8409873-8414409	-	P	4	20	134-P-P-P-P-P-P-P-P-P-P-P-P-P-P-P-P-P-P-P-P-8
RUF023640.t1	Chr7:9175755-9177566	+	E2	2	13	5-L1-S1-P1-L1-S1-P1-L1-S1-P2-L2-S2-E1-E2-68
RUF023642.t1	Chr7:9228770-9234413	-	E2	8	13	9-L1-S1-SS-SS-SS-P1-L1-S1-P2-L2-S2-E1-E2-224
RUF023918.t1	Chr7:12925860-12927762	+	E2	1	12	66-L1-S1-32-L1-S1-P1-L1-S1-P2-L2-S2-E1-E2-10
RUF024185.t1	Chr7:16304067-16306550	+	P	1	13	185-P-P-P-P-P-P-P-P-P-P-P-P-P-14
RUF024339.t1	Chr7:17637840-17644472	-	P	4	13	221-P-28-P-P-P-P-P-P-P-P-P-P-P-P-116
RUF024596.t1	Chr7:19577281-19582138	+	P	6	13	131-P-38-P-P-P-P-P-P-P-P-P-P-P-P-20
RUF024803.t1	Chr7:21282468-21288307	-	DYW	5	15	414-P1-L1-S1-P1-L1-S1-P1-L1-S1-P2-L2-S2-E1-E2-DYW
RUF024871.t1	Chr7:21789734-21792726	-	DYW	2	17	93-SS-P1-L1-S1-SS-P1-39-S1-SS-P1-L1-S1-P2-L2-S2-E1-E2-DYW
RUF024886.t1	Chr7:21935683-21938488	+	P	1	17	140-P-P-36-P-P-P-P-P-P-P-P-P-P-P-P-P-P-P-17
RUF024935.t1	Chr7:22257247-22259984	-	P	2	9	95-P-34-P-P-P-36-P-P-P-P-P-21
RUF024940.t1	Chr7:22288147-22292312	+	P	7	6	156-P-35-P-123-P-47-P-P-P-59
RUF024942.t1	Chr7:22295218-22299021	-	P	3	5	220-P-P-P-31-P-P-63
RUF024978.t1	Chr7:22595717-22599331	+	P	4	6	146-P-32-P-42-P-P-P-P-54
RUF025043.t1	Chr7:23060050-23062227	+	P	1	16	140-P-P-P-P-P-P-P-P-P-P-P-P-P-P-P-P-25
RUF025087.t1	Chr7:23388526-23391403	+	P	2	14	76-P-P-P-P-P-P-P-P-P-P-P-P-P-P-54
RUF025185.t1	Chr7:24114541-24116794	+	E2	1	17	82-S1-P1-L1-S1-P1-L1-S1-P1-L1-S1-P1-L1-S1-P2-36-S2-E1-E2-7
RUF025195.t1	Chr7:24186823-24188646	-	DYW	1	13	69-L1-S1-SS-SS-P1-L1-S1-P2-L2-S2-E1-E2-DYW
RUF025381.t1	Chr7:25551305-25555773	-	P	3	6	163-P-P-P-P-P-P-67
RUF025386.t1	Chr7:25567367-25572840	+	DYW	7	13	244-L1-S1-SS-SS-P1-L1-S1-P2-L2-S2-E1-E2-DYW
RUF025442.t1	Chr7:25954330-25956657	-	E2	1	17	66-S1-P1-L1-S1-P1-L1-S1-P1-30-S1-P1-L1-S1-P2-L2-S2-E1-E2-58
RUF025450.t1	Chr7:25992241-25994091	-	P	1	12	106-P-P-P-P-P-P-P-P-P-P-P-P-24
RUF025476.t1	Chr7:26115508-26118505	-	P	2	13	145-P-P-P-P-P-P-P-P-P-P-P-P-P-144
RUF025592.t1	Chr7:27186596-27190054	-	P	3	14	159-P-P-P-P-P-P-P-P-P-P-P-P-P-P-16
RUF025656.t1	Chr7:28108160-28113945	-	P	11	22	173-P-P-P-P-P-P-P-P-P-P-P-P-P-P-P-P-P-P-P-P-P-P-391
RUF025726.t1	Chr8:1030895-1033385	-	P	2	15	90-P-P-P-P-P-P-P-P-P-P-P-P-P-P-P-36
RUF025728.t1	Chr8:1049103-1051677	-	P	1	16	26-P-37-P-P-P-P-P-P-P-P-P-P-P-P-P-P-P
RUF025745.t1	Chr8:1200993-1202978	+	P	3	10	64-P-32-P-39-P-P-P-P-P-P-P-P
RUF025759.t1	Chr8:1312047-1317889	-	PLS	2	14	41-L1-32-P1-L1-S1-SS-P1-L1-S1-P1-L1-S1-P2-L2-S2-524
RUF025885.t1	Chr8:2430533-2436030	+	E1	3	18	61-S1-SS-SS-SS-SS-SS-P1-L1-S1-SS-SS-P1-L1-S1-P2-L2-S2-E1-539
RUF025888.t1	Chr8:2446507-2456981	+	PLS	14	9	577-S1-SS-38-SS-SS-P1-L1-S1-SS-SS-558
RUF025928.t3	Chr8:2764484-2767823	+	DYW	3	13	147-S1-P1-L1-S1-P1-L1-S1-P2-L2-S2-E1-E2-DYW
RUF026027.t1	Chr8:3776526-3780221	-	DYW	3	14	47-SS-SS-SS-SS-SS-P1-L1-S1-P2-L2-S2-E1-E2-DYW
RUF026101.t1	Chr8:4433549-4436824	+	E2	4	13	8-P1-L1-41-SS-SS-SS-SS-P1-37-S1-P2-L2-S2-E1-E2-10
RUF026102.t1	Chr8:4443855-4447192	+	P	3	7	148-P-P-P-69-P-P-P-P-48
RUF026195.t1	Chr8:5183888-5184298	-	P	1	4	4-P-P-P-P
RUF026277.t1	Chr8:5981164-5985725	+	P	7	9	141-P-P-P-P-32-P-P-P-P-P-117
RUF026499.t2	Chr8:9123133-9127821	+	E2	3	10	172-L1-S1-P1-L1-S1-P2-L2-S2-E1-E2-53
RUF026558.t1	Chr8:9778008-9782786	+	P	6	19	19-P-42-P-P-P-P-P-P-P-P-P-P-P-P-P-P-P-P-P-P-167
RUF026566.t1	Chr8:9851522-9860057	-	E+	13	12	170-P1-L1-32-SS-P1-L1-S1-P2-L2-S2-E1-E2-E+
RUF026651.t1	Chr8:11030218-11031198	+	P	1	6	9-P-35-P-P-P-31-P-P-41
RUF026749.t1	Chr8:13334534-13343347	-	P	5	17	71-P-P-P-P-P-P-P-P-P-P-P-P-P-47-P-P-P-P-22
RUF026790.t1	Chr8:14048133-14050889	-	P	1	19	179-P-P-P-P-P-P-P-P-P-P-P-P-P-P-P-59-P-P-P-P-15
RUF026936.t1	Chr8:15989169-15992572	+	E+	1	22	52-SS-P1-L1-S1-P1-L1-S1-P1-L1-S1-P1-L1-S1-P1-L1-S1-P2-L2-S2-E1-E2-E+
RUF027097.t1	Chr8:18331295-18334118	+	P	2	8	102-P-P-P-P-80-P-P-P-P-48
RUF027124.t1	Chr8:18823366-18825930	+	E2	1	16	26-S1-P1-L1-S1-P1-34-S1-P1-37-S1-P1-L1-S1-P2-L2-S2-E1-E2-59
RUF027240.t1	Chr8:20255141-20257660	+	P	1	16	124-P-P-P-P-P-P-P-P-P-P-P-P-P-P-P-P-2
RUF027415.t1	Chr8:21908919-21914439	+	E+	3	11	21-L1-67-L1-S1-P1-L1-S1-P2-L2-33-E1-E2-E+
RUF027703.t1	Chr8:24640847-24643130	-	E2	2	14	15-SS-32-SS-SS-SS-SS-SS-P1-L1-S1-P2-L2-S2-E1-E2-58
RUF027794.t1	Chr8:25281373-25291578	+	E2	11	11	122-L1-S1-P1-60-P1-L1-S1-P2-L2-S2-E1-E2-403
RUF027834.t1	Chr8:25548008-25551538	+	P	3	7	145-P-P-P-P-P-P-P-53
RUF027842.t1	Chr8:25591037-25592881	+	E2	1	15	58-P1-L1-S1-SS-SS-SS-SS-P1-L1-S1-P2-L2-S2-E1-E2-3
RUF027911.t1	Chr8:26207541-26212705	+	E2	9	15	173-S1-213-P1-L1-S1-P1-L1-S1-P1-L1-S1-P2-L2-S2-E1-E2-14
RUF028025.t1	Chr8:26942493-26945980	+	P	3	9	129-P-P-P-P-P-P-P-P-P
RUF028119.t1	Chr8:27674859-27676463	-	E2	1	13	4-L1-S1-P1-L1-S1-P1-L1-S1-P2-L2-S2-E1-E2-47
RUF028386.t1	Chr9:741465-745754	-	P	2	14	136-P-P-P-P-P-P-P-P-P-P-P-P-P-P-78
RUF028549.t1	Chr9:3834494-3837504	+	DYW	1	22	3-L1-S1-P1-32-S1-P1-L1-S1-P1-L1-S1-P1-L1-S1-P1-L1-S1-P2-L2-S2-E1-E2-DYW
RUF028908.t2	Chr9:8600648-8605532	+	DYW	3	18	34-SS-SS-SS-SS-SS-SS-SS-SS-SS-SS-P1-L1-S1-P2-36-S2-E1-E2-DYW
RUF029134.t1	Chr9:11196418-11200699	-	P	4	9	157-P-P-P-P-P-P-P-P-P-117
RUF029323.t1	Chr9:13092373-13100502	-	E2	10	13	626-S1-SS-SS-SS-SS-P1-L1-S1-P2-L2-S2-E1-E2-57
RUF029340.t1	Chr9:13284373-13286163	-	E2	1	11	44-L1-79-L1-S1-SS-P1-L1-S1-P2-33-S2-E1-E2-21
RUF029350.t1	Chr9:13343868-13345524	+	E2	1	12	2-L1-31-P1-L1-S1-P1-L1-S1-P2-L2-S2-E1-E2-56
RUF029354.t1	Chr9:13363840-13367807	-	E2	3	21	31-L1-S1-P1-L1-S1-P1-L1-S1-32-L1-S1-P1-L1-S1-P1-L1-S1-P2-L2-S2-E1-E2-5
RUF029384.t1	Chr9:13632297-13636345	+	P	4	14	105-P-P-P-P-P-P-P-P-P-P-P-P-P-P-20
RUF029413.t1	Chr9:13981156-13984476	+	P	2	20	190-P-37-P-P-P-P-P-P-P-P-P-P-P-P-36-P-P-P-P-P-P-P-2
RUF029470.t1	Chr9:14496861-14511471	+	P	11	9	100-P-P-P-P-P-P-P-P-P-183
RUF029759.t1	Chr9:16827543-16837032	-	P	15	9	125-P-70-P-109-P-P-34-P-48-P-P-P-P-159
RUF029762.t1	Chr9:16856089-16866200	+	DYW	12	8	42-P1-L1-S1-SS-P1-L1-S1-81-DYW
RUF030031.t1	Chr9:19079277-19087431	+	E2	7	16	61-SS-P1-L1-S1-SS-P1-L1-S1-SS-P1-L1-S1-P2-L2-S2-38-E2-348
RUF030105.t1	Chr9:19660778-19668820	+	P	17	6	154-P-P-P-P-P-P-739
RUF030106.t1	Chr9:19671372-19672592	+	P	1	6	154-P-P-P-P-P-P-42
RUF030179.t1	Chr9:20146476-20149229	-	P	2	10	143-P-P-P-P-P-P-37-P-P-P-P-12
RUF030281.t1	Chr9:20847423-20850370	-	E2	3	16	8-L1-31-P1-L1-S1-P1-L1-S1-SS-P1-L1-S1-P2-L2-S2-E1-E2-64
RUF030412.t1	Chr9:21682607-21690856	+	E+	11	12	52-P1-L1-S1-P1-L1-S1-P2-L2-S2-E1-E2-E+
RUF030501.t2	Chr10:1532908-1537156	-	P	3	23	12-P-P-P-P-P-P-P-P-P-35-P-P-P-P-P-P-P-P-44-P-P-P-P-P-P-33
RUF030672.t1	Chr10:3258286-3261699	+	P	2	16	155-P-P-P-P-P-P-36-P-P-P-P-P-P-P-P-P-34-P-70
RUF030818.t1	Chr10:5116037-5117920	+	DYW	1	5	164-L1-S1-P2-L2-66-DYW
RUF030929.t1	Chr10:6417614-6425355	-	P	18	12	281-P-32-P-P-P-P-P-P-P-P-P-P-P-213
RUF031294.t1	Chr10:11529771-11534995	-	P	6	8	100-P-P-P-P-P-113-P-32-P-P-21
RUF031321.t3	Chr10:11959423-11964583	+	P	2	9	144-P-P-P-36-P-P-P-P-P-P-17
RUF031351.t1	Chr10:12214566-12216626	-	P	1	15	138-P-P-P-P-P-P-P-P-P-P-P-P-P-P-P-26
RUF031528.t1	Chr10:13961968-13963923	-	E2	1	15	6-L1-83-L1-S1-P1-L1-S1-SS-P1-L1-S1-P2-L2-S2-E1-E2-55
RUF031674.t1	Chr10:15302498-15305731	-	P	1	26	86-P-35-P-P-P-P-P-P-P-P-P-P-P-P-P-P-P-36-P-P-P-P-P-P-P-P-P-P-11
RUF031677.t1	Chr10:15331126-15337915	+	P	7	7	126-P-P-P-P-37-P-P-P-285
RUF031762.t1	Chr10:16121509-16131330	+	E2	12	12	807-P1-L1-S1-SS-P1-L1-S1-P2-L2-S2-E1-E2-56
RUF031772.t1	Chr10:16218052-16220241	-	DYW	1	14	63-L1-S1-P1-L1-S1-P1-L1-S1-P2-L2-S2-E1-E2-DYW
RUF031968.t1	Chr10:18043158-18046413	-	P	3	12	136-P-P-P-P-P-P-P-P-P-P-P-P-43
RUF031972.t1	Chr10:18069679-18073361	-	DYW	1	22	48-P1-L1-S1-SS-SS-P1-L1-S1-SS-SS-P1-L1-S1-P1-L1-S1-P2-L2-S2-E1-E2-DYW
RUF031984.t1	Chr10:18239184-18244066	+	P	4	16	66-P-36-P-P-P-P-P-P-P-P-P-P-P-P-P-P-P-8
RUF032021.t2	Chr10:18638882-18641181	-	P	2	10	155-P-P-38-P-P-P-P-P-P-P-P-35
RUF032029.t1	Chr10:18664861-18666698	-	P	1	7	149-P-P-P-P-P-P-P-21
RUF032067.t1	Chr10:19010552-19012648	+	DYW	1	16	19-L1-S1-P1-L1-S1-36-L1-S1-P1-L1-S1-P2-L2-S2-E1-E2-DYW
RUF032111.t1	Chr10:19259106-19261647	-	P	2	9	11-P-37-P-29-P-P-P-P-P-P-P-13
RUF032114.t1	Chr10:19278638-19304963	-	P	2	19	19-P-37-P-P-P-P-P-P-P-P-P-P-P-P-P-P-P-P-P-P-57
RUF032115.t1	Chr10:19284538-19286880	-	P	1	19	17-P-37-P-P-P-P-P-P-P-P-P-P-P-P-P-P-P-P-P-P-57
RUF032121.t1	Chr10:19315853-19318442	-	P	4	8	201-P-38-P-P-P-P-P-P-P-2
RUF032133.t1	Chr10:19392120-19399917	+	P	10	20	18-P-37-P-P-P-P-P-P-P-P-P-P-P-P-P-P-P-P-P-P-P-432
RUF032134.t1	Chr10:19402972-19405363	+	P	1	19	14-P-37-P-P-P-P-P-P-P-P-P-P-P-P-P-P-P-P-P-P-71
RUF032136.t1	Chr10:19411044-19416012	+	P	5	18	50-P-P-P-P-P-P-P-P-P-P-P-P-P-P-P-P-P-P-164
RUF032151.t1	Chr10:19529295-19538033	+	P	10	8	17-P-37-P-P-P-P-P-P-P-312
RUF032159.t1	Chr10:19577431-19579543	+	P	2	8	132-P-P-P-40-P-P-P-P-P-12
RUF032161.t1	Chr10:19582945-19584991	+	P	2	10	114-P-P-32-P-P-P-P-P-P-P-35-P-12
RUF032162.t1	Chr10:19586131-19591525	+	P	3	9	149-P-34-P-P-P-P-38-P-P-P-35-P-12
RUF032165.t1	Chr10:19616752-19618116	-	P	1	12	10-P-P-P-P-P-P-P-P-P-P-P-P-28
RUF032198.t1	Chr10:19796330-19798122	+	P	1	8	182-P-35-P-P-P-P-P-P-P-11
RUF032417.t1	Chr10:21543870-21546063	-	DYW	1	16	41-S1-P1-L1-S1-P1-L1-S1-P1-L1-S1-P2-L2-S2-E1-E2-DYW
RUF032533.t1	Chr10:22454577-22458673	+	E+	2	24	56-L1-S1-SS-P1-L1-S1-P1-L1-S1-P1-L1-S1-P1-L1-S1-P1-L1-S1-P2-L2-S2-E1-E2-E+
RUF032598.t1	Chr10:22935816-22937405	+	E1	1	12	126-SS-P1-L1-S1-SS-P1-L1-S1-P2-L2-S2-E1
RUF032681.t1	Chr10:23458178-23460249	-	P	1	11	107-P-31-P-35-P-P-P-33-P-P-P-P-P-P-40
RUF032735.t1	Chr11:495154-496757	+	E1	2	11	42-L1-65-L1-S1-SS-SS-P1-L1-S1-P2-33-S2-E1
RUF032789.t1	Chr11:832373-839735	-	E2	8	10	850-L1-S1-P1-72-L1-S1-P2-L2-S2-E1-E2-11
RUF032847.t1	Chr11:1387446-1392113	+	DYW	4	9	516-S1-44-L1-S1-P2-L2-S2-E1-E2-DYW
RUF032883.t1	Chr11:1720637-1743468	-	P	18	14	608-P-P-P-P-P-P-P-P-P-P-P-P-P-P-53
RUF033034.t1	Chr11:2733201-2741101	+	E1	10	5	32-S1-P2-L2-S2-E1-873
RUF033344.t1	Chr11:5769181-5772346	+	E2	2	11	52-P1-L1-S1-P1-L1-S1-P2-L2-S2-E1-E2-27
RUF033553.t1	Chr11:7926344-7928627	-	E2	2	15	55-S1-P1-L1-S1-P1-L1-S1-P1-L1-S1-P2-L2-S2-E1-E2-18
RUF033804.t1	Chr11:12909566-12911936	+	E2	1	15	40-SS-32-SS-SS-SS-SS-SS-SS-P1-L1-S1-P2-L2-S2-E1-E2-60
RUF033808.t1	Chr11:12953852-12955837	+	P	1	11	101-P-35-P-P-P-P-P-P-P-P-P-P-127
RUF033983.t1	Chr11:15810417-15813301	+	DYW	1	17	56-L1-S1-P1-L1-S1-P1-L1-S1-P1-L1-S1-P2-L2-S2-E1-E2-DYW
RUF033991.t1	Chr11:15903372-15904808	-	E2	1	11	82-P1-L1-S1-P1-L1-S1-P2-L2-S2-E1-E2-12
RUF034583.t1	Chr11:21968697-21973109	+	DYW	4	16	14-L1-S1-P1-L1-S1-P1-35-S1-P1-L1-S1-P2-L2-S2-E1-E2-DYW
RUF034594.t1	Chr11:22069106-22076003	-	E2	5	17	48-S1-P1-L1-S1-P1-L1-S1-P1-L1-S1-P1-L1-S1-P2-L2-34-E1-E2-10
RUF034717.t1	Chr11:23163072-23165823	+	P	3	16	88-P-P-P-P-P-P-P-P-P-P-P-P-P-P-P-P-3
RUF035139.t1	Chr11:27319291-27329049	+	E2	2	9	155-SS-38-P1-L1-S1-P2-L2-S2-E1-E2-17
RUF035297.t1	Chr12:55025-57938	-	E2	1	20	68-S1-P1-L1-S1-P1-L1-S1-P1-L1-S1-P1-L1-32-P1-L1-S1-P2-L2-S2-E1-E2-9
RUF035299.t1	Chr12:62243-66136	+	DYW	2	14	549-L1-S1-P1-L1-S1-P1-L1-S1-P2-L2-S2-E1-E2-DYW
RUF035352.t1	Chr12:416541-418634	-	P	1	12	128-P-39-P-P-P-43-P-P-P-P-P-P-P-P-62
RUF035397.t1	Chr12:801306-803399	+	P	1	12	128-P-39-P-P-P-43-P-P-P-P-P-P-P-P-62
RUF035440.t1	Chr12:1161754-1167149	-	DYW	3	11	489-S1-SS-P1-L1-S1-P2-L2-S2-E1-E2-DYW
RUF035442.t1	Chr12:1175485-1179041	+	E2	3	20	62-S1-P1-L1-S1-P1-L1-S1-P1-L1-S1-P1-L1-32-P1-L1-S1-P2-L2-S2-E1-E2-104
RUF035463.t1	Chr12:1350401-1352806	+	E2	1	12	6-L1-65-L1-S1-SS-SS-P1-L1-S1-P2-33-S2-E1-E2-10
RUF035549.t1	Chr12:2002808-2004824	+	DYW	1	10	170-SS-P1-L1-S1-P2-L2-S2-E1-E2-DYW
RUF035564.t1	Chr12:2088071-2089127	+	PLS	2	5	L1-79-S1-P1-L1-S1
RUF035606.t1	Chr12:2348628-2350368	-	P	4	3	9-P-P-28-P-123
RUF035607.t1	Chr12:2350370-2353268	-	P	5	14	249-P-P-P-P-P-P-P-P-P-P-P-P-P-P
RUF035737.t1	Chr12:3163328-3164920	-	P	1	14	9-P-P-P-P-P-P-P-P-P-P-P-P-P-P-30
RUF035773.t1	Chr12:3399877-3402721	+	DYW	2	14	55-L1-S1-P1-L1-S1-P1-L1-S1-P2-L2-S2-E1-E2-DYW
RUF035821.t1	Chr12:3823855-3826279	-	DYW	2	13	46-S1-P1-L1-S1-P1-L1-S1-P2-L2-S2-E1-E2-DYW
RUF035863.t1	Chr12:4158832-4169411	-	P	10	7	650-P-34-P-P-32-P-P-P-P-57
RUF035917.t1	Chr12:4712430-4715423	+	DYW	3	12	73-P1-L1-S1-P1-L1-S1-P2-L2-S2-E1-E2-DYW
RUF036015.t1	Chr12:5542214-5548663	-	PLS	10	16	95-L1-S1-P1-L1-S1-P1-L1-S1-P1-L1-S1-P1-L1-S1-P2-L2-707
RUF036086.t1	Chr12:6530545-6532536	-	E2	1	15	34-L1-31-P1-L1-S1-P1-L1-S1-SS-P1-36-S1-P2-L2-S2-E1-E2-49
RUF036173.t2	Chr12:7730610-7734407	-	E2	2	21	50-S1-P1-L1-S1-P1-L1-S1-P1-L1-S1-P1-L1-S1-P1-L1-S1-P2-L2-S2-E1-E2-23
RUF036231.t1	Chr12:8711651-8713977	+	DYW	3	10	97-S1-P1-L1-S1-P2-L2-S2-E1-E2-DYW
RUF036324.t1	Chr12:9584667-9586993	+	P	1	12	79-P-P-P-P-P-36-P-P-P-P-P-P-P-74
RUF036357.t2	Chr12:9997194-10002511	-	E2	5	20	41-SS-SS-SS-SS-SS-SS-SS-SS-SS-SS-SS-SS-P1-L1-S1-P2-L2-S2-E1-E2-8
RUF036508.t1	Chr12:12731386-12734989	+	DYW	2	12	92-L1-S1-P1-L1-32-P1-L1-S1-P2-36-S2-E1-E2-DYW
RUF036568.t1	Chr12:13711994-13716398	-	P	3	20	253-P-P-P-P-P-P-P-P-P-P-166-P-P-P-P-P-P-P-P-P-P-11
RUF036716.t1	Chr12:15869683-15872447	+	E2	3	14	7-L1-30-P1-L1-S1-SS-SS-P1-L1-S1-P2-L2-S2-E1-E2-41
RUF036859.t1	Chr12:17150787-17155864	+	DYW	2	22	76-S1-P1-L1-S1-P1-L1-S1-P1-L1-S1-P1-L1-S1-P1-L1-S1-P2-L2-S2-E1-E2-DYW
RUF037004.t1	Chr12:18623366-18625330	-	P	2	10	72-P-P-33-P-P-P-P-P-P-P-P-55
RUF037041.t3	Chr12:18905174-18908839	+	P	2	15	152-P-P-P-P-P-P-P-P-P-P-P-P-P-P-P-18
RUF037074.t1	Chr12:19173522-19186060	+	P	12	11	207-P-36-P-35-P-P-P-P-P-P-P-P-67-P-663
RUF037179.t1	Chr12:19963064-19965621	-	E2	1	15	26-L1-S1-P1-L1-S1-SS-SS-SS-P1-L1-S1-P2-36-S2-E1-E2-55
RUF037528.t1	Chr12:22930391-22932970	-	P	1	9	365-P-P-P-P-P-P-P-P-68-P-112
RUF037888.t1	PGA_scaffold318:161630-169013	-	E+	9	25	264-L1-S1-P1-38-S1-P1-L1-S1-P1-L1-S1-P1-L1-S1-P1-L1-S1-P1-L1-S1-P2-L2-S2-E1-E2-E+
RUF038032.t1	PGA_scaffold325:101584-104197	-	E2	2	15	44-L1-37-P1-L1-S1-P1-L1-S1-P1-L1-S1-P2-L2-S2-E1-E2-52
RUF038117.t1	PGA_scaffold333:280397-287328	+	P	5	16	182-P-P-P-P-P-P-P-P-P-P-P-P-P-P-P-P-60
RUF038220.t1	PGA_scaffold340:104224-122608	+	P	7	18	747-P-P-P-P-44-P-P-P-P-P-33-P-P-P-P-P-P-P-P-68-P-58
RUF038252.t1	PGA_scaffold341:170220-176379	+	P	6	22	205-P-P-P-P-P-P-P-P-P-P-P-P-P-P-P-P-P-P-P-P-37-P-P-8
RUF038255.t1	PGA_scaffold341:182711-184607	-	E2	1	14	76-P1-L1-S1-P1-L1-S1-P1-L1-S1-P2-L2-S2-E1-E2-45
RUF038417.t1	PGA_scaffold345:297285-298557	-	P	1	5	132-P-P-48-P-P-P-50
RUF038434.t2	PGA_scaffold348:35229-39454	-	P	3	7	213-P-P-P-P-P-P-P
RUF038473.t1	PGA_scaffold352:36985-41082	-	P	3	18	98-P-55-P-P-P-P-P-P-P-P-P-P-P-P-P-P-P-P-P-21
RUF038491.t3	PGA_scaffold353:188375-194151	+	DYW	4	13	69-S1-36-L1-S1-SS-P1-L1-S1-P2-L2-S2-E1-E2-DYW
RUF038507.t1	PGA_scaffold354:47455-49672	-	P	2	14	9-P-P-P-P-P-P-P-P-P-P-P-P-P-35-P-90
