# Supplementary material for: Comparative Genomic Analysis of Asian Cultivated Rice and Its Wild Progenitor (Oryza rufipogon) Has Revealed Evolutionary Innovation of the Pentatricopeptide Repeat Gene Family through Gene Duplication
Source: Int J Mol Sci. 2023 Nov 14;24(22):16313. doi: 10.3390/ijms242216313 (PMC10671101; doi:10.3390/ijms242216313)
Supplement: Supplementary file 1 [file ijms-24-16313-s001.zip › Table S3.xlsx]

## Sheet: sheet1 
Table S3. The number of various types of gene duplication in the PPR gene family.
	O. sativa				O. rufipogon
	WGD	Tandem	Proximal	Dispersed	WGD	Tandem	Proximal	Dispersed
Whole genome	5978	3332	4246	31625	5399	2792	3176	16112
PPR genes	17	12	11	293	30	7	26	300
