# Supplementary material for: Comparative Genomic Analysis of Asian Cultivated Rice and Its Wild Progenitor (Oryza rufipogon) Has Revealed Evolutionary Innovation of the Pentatricopeptide Repeat Gene Family through Gene Duplication
Source: Int J Mol Sci. 2023 Nov 14;24(22):16313. doi: 10.3390/ijms242216313 (PMC10671101; doi:10.3390/ijms242216313)
Supplement: Supplementary file 1 [file ijms-24-16313-s001.zip › Table S4.xlsx]

## Sheet: Sheet1
Table S4. The number of PPR genes generated by segmental duplications.
	O. sativa		O. rufipogon
	non-SD	SD	non-SD	SD
PPR genes	52	408	65	479
