# Supplementary material for: Comparative Genomic Analysis of Asian Cultivated Rice and Its Wild Progenitor (Oryza rufipogon) Has Revealed Evolutionary Innovation of the Pentatricopeptide Repeat Gene Family through Gene Duplication
Source: Int J Mol Sci. 2023 Nov 14;24(22):16313. doi: 10.3390/ijms242216313 (PMC10671101; doi:10.3390/ijms242216313)
Supplement: Supplementary file 1 [file ijms-24-16313-s001.zip › Table S5.xlsx]

## Sheet: Sheet1
Table S5. Characterisitics of segmental duplications in the O. rufipogon genome.
SD1	SD2	SD-identity	SD-kimura-distance	Gene1	Gene2	Gene blast similarity	Gene1 completeness	Gene2 completeness	Gene1 type	Gene2 type	Gene1-exon-num	Gene1-motif-num	Gene1-motif-structure	Gene2-exon-num	Gene2-motif-num	Gene2-motif-structure
r1Chr10_19256146_19258673_+	r1Chr10_19415423_19418834_+	0.966019	0.0348007	RUF032109	RUF032136	35.922	Incomplete	Incomplete	unknown	P	unknown	unknown	unknown	5	18	50-P-P-P-P-P-P-P-P-P-P-P-P-P-P-P-P-P-P-164
r1Chr10_19276577_19280006_+	r1Chr10_19312635_19316152_+	0.955932	0.0456766	RUF032114	RUF032121	22	Incomplete	Incomplete	P	P	2	19	19-P-37-P-P-P-P-P-P-P-P-P-P-P-P-P-P-P-P-P-P-57	4	8	201-P-38-P-P-P-P-P-P-P-2
r1Chr10_19280718_19292696_+	r1Chr10_19301931_19312263_+	0.972979	0.027567	RUF032115	RUF032114	92.465	Complete	Incomplete	P	P	1	19	17-P-37-P-P-P-P-P-P-P-P-P-P-P-P-P-P-P-P-P-P-57	2	19	19-P-37-P-P-P-P-P-P-P-P-P-P-P-P-P-P-P-P-P-P-57
r1Chr10_19375335_19378426_+	r1Chr10_19395005_19398116_+	0.960248	0.0409609	RUF032131	RUF032133	93.798	Incomplete	Incomplete	unknown	P	unknown	unknown	unknown	10	20	18-P-37-P-P-P-P-P-P-P-P-P-P-P-P-P-P-P-P-P-P-P-432
r1Chr10_19578081_19579891_+	r1Chr10_19582870_19585026_+	0.94697	0.0551357	RUF032159	RUF032161	56.311	Incomplete	Complete	P	P	2	8	132-P-P-P-40-P-P-P-P-P-12	2	10	114-P-P-32-P-P-P-P-P-P-P-35-P-12
r1Chr10_19703304_19704622_+	r1Chr5_16319997_16321242_+	0.937702	0.0653789	RUF032183	RUF018011	72.941	Incomplete	Incomplete	unknown	P	unknown	unknown	unknown	5	12	465-P-P-P-P-P-P-P-P-P-P-P-P-334
r1Chr1_10273402_10278258__	r1Chr12_4157962_4162739__	0.952093	0.0495964	RUF001201	RUF035863	94.935	Incomplete	Incomplete	P	P	3	7	173-P-34-P-34-P-67-P-P-P-P-57	10	7	650-P-34-P-P-32-P-P-P-P-57
r1Chr11_1376909_1392618_+	r1Chr12_1985839_2005166_+	0.946685	0.0554017	RUF032847	RUF035548	87.143	Complete	Complete	DYW	unknown	4	9	516-S1-44-L1-S1-P2-L2-S2-E1-E2-DYW	unknown	unknown	unknown
r1Chr11_1376909_1392618_+	r1Chr12_1985839_2005166_+	0.946685	0.0554017	RUF032847	RUF035549	94.318	Complete	Complete	DYW	DYW	4	9	516-S1-44-L1-S1-P2-L2-S2-E1-E2-DYW	1	10	170-SS-P1-L1-S1-P2-L2-S2-E1-E2-DYW
r1Chr11_1390241_1399468_+	r1Chr12_2002807_2013709_+	0.949608	0.0523241	RUF032847	RUF035549	94.318	Incomplete	Complete	DYW	DYW	4	9	516-S1-44-L1-S1-P2-L2-S2-E1-E2-DYW	1	10	170-SS-P1-L1-S1-P2-L2-S2-E1-E2-DYW
r1Chr11_1498675_1501630_+	r1Chr3_21721965_21724311_+	0.94196	0.0607337	RUF032857	RUF011443	22.807	Incomplete	Incomplete	unknown	P	unknown	unknown	unknown	1	17	73-P-37-P-P-P-P-P-P-P-P-P-P-P-P-P-P-P-33-P-3
r1Chr11_1714935_1729453_+	r1Chr12_2344394_2354001_+	0.961977	0.039111	RUF032883	RUF035606	24.684	Incomplete	Complete	P	P	18	14	608-P-P-P-P-P-P-P-P-P-P-P-P-P-P-53	4	3	9-P-P-28-P-123
r1Chr11_1714935_1729453_+	r1Chr12_2344394_2354001_+	0.961977	0.039111	RUF032883	RUF035607	23.747	Incomplete	Complete	P	P	18	14	608-P-P-P-P-P-P-P-P-P-P-P-P-P-P-53	5	14	249-P-P-P-P-P-P-P-P-P-P-P-P-P-P
r1Chr11_1714935_1729453_+	r1Chr12_2344394_2354001_+	0.961977	0.039111	RUF032883	RUF035608	64.706	Incomplete	Complete	P	unknown	18	14	608-P-P-P-P-P-P-P-P-P-P-P-P-P-P-53	unknown	unknown	unknown
r1Chr11_1737984_1748595_+	r1Chr12_2354256_2366826_+	0.962384	0.0386598	RUF032883	RUF035609	67.429	Incomplete	Complete	P	unknown	18	14	608-P-P-P-P-P-P-P-P-P-P-P-P-P-P-53	unknown	unknown	unknown
r1Chr1_14674173_14677251_+	r1Chr9_3834766_3837839_+	0.96876	0.0319864	RUF001627	RUF028549	96.697	Incomplete	Incomplete	DYW	DYW	1	21	36-S1-P1-32-S1-P1-L1-S1-P1-L1-S1-P1-L1-S1-P1-L1-S1-P2-L2-S2-E1-E2-DYW	1	22	3-L1-S1-P1-32-S1-P1-L1-S1-P1-L1-S1-P1-L1-S1-P1-L1-S1-P2-L2-S2-E1-E2-DYW
r1Chr11_474166_519056_+	r1Chr12_1331149_1368447_+	0.952175	0.0494818	RUF032735	RUF035463	92.205	Complete	Complete	E1	E2	2	11	42-L1-65-L1-S1-SS-SS-P1-L1-S1-P2-33-S2-E1	1	12	6-L1-65-L1-S1-SS-SS-P1-L1-S1-P2-33-S2-E1-E2-10
r1Chr12_1098113_1099750__	r1Chr12_1178392_1180013__	0.9601	0.0410199	RUF035434	RUF035442	80.702	Incomplete	Incomplete	unknown	E2	unknown	unknown	unknown	3	20	62-S1-P1-L1-S1-P1-L1-S1-P1-L1-S1-P1-L1-32-P1-L1-S1-P2-L2-S2-E1-E2-104
r1Chr12_115769_117399_+	r1Chr12_1178392_1180019_+	0.953951	0.0476328	RUF035308	RUF035442	80.702	Incomplete	Incomplete	unknown	E2	unknown	unknown	unknown	3	20	62-S1-P1-L1-S1-P1-L1-S1-P1-L1-S1-P1-L1-32-P1-L1-S1-P2-L2-S2-E1-E2-104
r1Chr12_406828_418931__	r1Chr12_801011_810727__	0.959836	0.0413203	RUF035352	RUF035397	97.851	Complete	Complete	P	P	1	12	128-P-39-P-P-P-43-P-P-P-P-P-P-P-P-62	1	12	128-P-39-P-P-P-43-P-P-P-P-P-P-P-P-62
r1Chr12_55223_57603__	r1Chr12_1175479_1177865__	0.960924	0.0402218	RUF035297	RUF035442	93.35	Incomplete	Incomplete	E2	E2	1	20	68-S1-P1-L1-S1-P1-L1-S1-P1-L1-S1-P1-L1-32-P1-L1-S1-P2-L2-S2-E1-E2-9	3	20	62-S1-P1-L1-S1-P1-L1-S1-P1-L1-S1-P1-L1-32-P1-L1-S1-P2-L2-S2-E1-E2-104
r1Chr12_58532_102792__	r1Chr12_1114816_1170468__	0.935915	0.0670549	RUF035298	RUF035440	47.558	Incomplete	Complete	unknown	DYW	unknown	unknown	unknown	3	11	489-S1-SS-P1-L1-S1-P2-L2-S2-E1-E2-DYW
r1Chr12_58532_102792__	r1Chr12_1114816_1170468__	0.935915	0.0670549	RUF035299	RUF035440	92.342	Complete	Complete	DYW	DYW	2	14	549-L1-S1-P1-L1-S1-P1-L1-S1-P2-L2-S2-E1-E2-DYW	3	11	489-S1-SS-P1-L1-S1-P2-L2-S2-E1-E2-DYW
r1Chr12_58532_102792__	r1Chr12_1114816_1170468__	0.935915	0.0670549	RUF035299	RUF035441	46.75	Complete	Incomplete	DYW	unknown	2	14	549-L1-S1-P1-L1-S1-P1-L1-S1-P2-L2-S2-E1-E2-DYW	unknown	unknown	unknown
r1Chr1_32742610_32746272_+	r1Chr4_1595555_1599213_+	0.995348	0.00466854	RUF003643	RUF013276	99.773	Complete	Complete	E2	E2	1	11	45-L1-S1-SS-P1-L1-S1-P2-L2-S2-E1-E2-21	2	11	45-L1-S1-SS-P1-L1-S1-P2-L2-S2-E1-E2-21
r1Chr1_37313203_37314559__	r1Chr5_8728464_8729683__	0.924979	0.079515	RUF004256	RUF017440	64.925	Incomplete	Incomplete	P	unknown	1	8	222-P-P-P-36-P-P-P-P-P-25	unknown	unknown	unknown
r1Chr1_41198098_41199998__	r1Chr7_5549976_5551876__	0.960526	0.0407301	RUF004782	RUF023348	92.97	Incomplete	Incomplete	E2	E2	7	15	505-S1-P1-L1-S1-P1-L1-S1-P1-L1-S1-P2-L2-S2-E1-E2-14	1	15	48-S1-P1-L1-S1-P1-L1-S1-P1-L1-S1-P2-L2-S2-E1-E2-14
r1Chr1_41374142_41376006__	r1Chr5_16319658_16321243__	0.946869	0.0554155	RUF004810	RUF018011	73.958	Incomplete	Incomplete	unknown	P	unknown	unknown	unknown	5	12	465-P-P-P-P-P-P-P-P-P-P-P-P-334
r1Chr2_4652524_4654997__	r1Chr6_29414312_29416772__	0.911765	0.0942226	RUF005437	RUF022530	23.982	Incomplete	Incomplete	DYW	E+	3	17	36-S1-P1-39-S1-SS-P1-L1-S1-SS-P1-L1-S1-P2-L2-S2-E1-E2-DYW	12	17	60-S1-P1-37-S1-SS-P1-L1-S1-SS-P1-L1-S1-P2-L2-S2-E1-E2-E+
r1Chr3_15654763_15656732__	r1Chr3_16775864_16778393__	0.926829	0.0773078	RUF010974	RUF011066	79.545	Incomplete	Incomplete	P	unknown	9	5	212-P-P-P-P-P-309	unknown	unknown	unknown
r1Chr3_15657202_15658276__	r1Chr5_25964862_25966106__	0.95247	0.0492093	RUF010974	RUF019239	67.99	Incomplete	Incomplete	P	P	9	5	212-P-P-P-P-P-309	2	9	94-P-P-P-P-P-P-P-P-P-36
r1Chr3_21853028_21870053__	r1Chr5_12909860_12926468__	0.980966	0.0192939	RUF011456	RUF017713	98.757	Incomplete	Complete	DYW	DYW	2	21	27-L1-S1-P1-L1-S1-P1-L1-S1-SS-P1-L1-S1-P1-L1-S1-P2-L2-S2-E1-E2-DYW	1	21	27-L1-S1-P1-L1-S1-P1-L1-S1-SS-P1-L1-S1-P1-L1-S1-P2-L2-S2-E1-E2-DYW
r1Chr3_2951756_2953557__	r1Chr3_29691194_29692983__	0.942373	0.0601494	RUF009301	RUF012296	93.45	Incomplete	Incomplete	E2	E2	1	9	95-L1-S1-35-L1-S1-P2-L2-S2-E1-E2-54	9	9	437-L1-S1-35-L1-S1-P2-L2-S2-E1-E2-54
r1Chr3_34528867_34532946__	r1Chr4_11148403_11168511__	0.922918	0.0818639	RUF012986	RUF013921	90	Incomplete	Incomplete	E+	unknown	23	20	876-L1-S1-P1-L1-S1-P1-L1-S1-P1-L1-S1-P1-L1-S1-P2-L2-S2-E1-E2-E+	unknown	unknown	unknown
r1Chr3_4153172_4154307_+	r1Chr3_4157912_4159031_+	0.945355	0.0569447	RUF009498	RUF009500	96.154	Incomplete	Incomplete	E2	unknown	6	10	61-P1-29-L1-S1-P1-33-S1-P2-L2-S2-E1-E2-137	unknown	unknown	unknown
r1Chr4_15265502_15267569__	r1Chr4_15360139_15362308__	0.913508	0.0920466	RUF014225	RUF014235	81.001	Incomplete	Incomplete	P	P	1	16	121-P-P-P-P-P-P-P-P-P-P-P-P-P-P-P-P-66	1	15	47-P-P-P-P-P-P-35-P-P-P-P-P-P-P-P-P-72
r1Chr4_15452714_15455413__	r1Chr5_13063273_13065647__	0.957783	0.043563	RUF014242	RUF017720	82.553	Incomplete	Incomplete	E2	unknown	26	17	1055-S1-P1-L1-S1-70-L1-S1-SS-SS-SS-P1-L1-S1-P2-L2-S2-E1-E2-71	unknown	unknown	unknown
r1Chr4_21890202_21891793_+	r1Chr5_27775662_27777252_+	0.995597	0.00441762	RUF014944	RUF019508	26.364	Incomplete	Incomplete	P	P	1	4	1-P-P-P-P-20	2	11	1-P-P-P-P-P-P-P-P-P-P-P-59
r1Chr4_32366454_32368132_+	r1Chr4_32395083_32396758_+	0.977273	0.0230902	RUF016330	RUF016334	45.853	Incomplete	Incomplete	unknown	PLS	unknown	unknown	unknown	4	14	53-S1-P1-36-S1-P1-L1-S1-P1-L1-S1-P1-L1-S1-P2-L2-851
r1Chr4_485772_498317_+	r1Chr8_9122965_9133605_+	0.974101	0.0264007	RUF013185	RUF026499	97.869	Complete	Complete	E2	E2	2	10	219-L1-S1-P1-L1-S1-P2-L2-S2-E1-E2-53	3	10	172-L1-S1-P1-L1-S1-P2-L2-S2-E1-E2-53
r1Chr5_16650525_16651643_+	r1Chr5_16706836_16707954_+	0.952594	0.0491298	RUF018048	RUF018058	24.615	Incomplete	Incomplete	DYW	DYW	1	7	12-S1-P2-L2-S2-E1-E2-DYW	1	16	18-L1-S1-SS-P1-L1-S1-SS-P1-L1-S1-P2-L2-S2-E1-E2-DYW
r1Chr7_28107547_28110620__	r1Chr9_20816759_20820616__	0.94865	0.0532457	RUF025656	RUF030277	77.262	Incomplete	Incomplete	P	unknown	11	22	173-P-P-P-P-P-P-P-P-P-P-P-P-P-P-P-P-P-P-P-P-P-P-391	unknown	unknown	unknown
r1Chr8_2421512_2442359_+	r1Chr8_2442507_2463351_+	0.997787	0.00221626	RUF025884	RUF025888	98.302	Complete	Complete	unknown	PLS	unknown	unknown	unknown	14	9	577-S1-SS-38-SS-SS-P1-L1-S1-SS-SS-558
r1Chr8_2421512_2442359_+	r1Chr8_2442507_2463351_+	0.997787	0.00221626	RUF025885	RUF025888	27.733	Complete	Complete	E1	PLS	3	18	61-S1-SS-SS-SS-SS-SS-P1-L1-S1-SS-SS-P1-L1-S1-P2-L2-S2-E1-539	14	9	577-S1-SS-38-SS-SS-P1-L1-S1-SS-SS-558
r1Chr8_25287092_25291105_+	r1Chr8_25331563_25335725_+	0.939962	0.0626884	RUF027794	RUF027801	83.492	Incomplete	Incomplete	E2	unknown	11	11	122-L1-S1-P1-60-P1-L1-S1-P2-L2-S2-E1-E2-403	unknown	unknown	unknown
r1Chr9_19660126_19670189_+	r1Chr9_19670382_19674583_+	0.96631	0.0345191	RUF030105	RUF030106	97.135	Complete	Complete	P	P	17	6	154-P-P-P-P-P-P-739	1	6	154-P-P-P-P-P-P-42
r1Chr9_19660126_19670189_+	r1Chr9_19670382_19674583_+	0.96631	0.0345191	RUF030105	RUF030107	95.876	Complete	Incomplete	P	unknown	17	6	154-P-P-P-P-P-P-739	unknown	unknown	unknown
r1PGA_scaffold352__1_contigs__length_50000_29017_39601__	r1PGA_scaffold354__1_contigs__length_50100_38885_50000__	0.978135	0.0222208	RUF038473	RUF038507	28.926	Incomplete	Complete	P	P	3	18	98-P-55-P-P-P-P-P-P-P-P-P-P-P-P-P-P-P-P-P-21	2	14	9-P-P-P-P-P-P-P-P-P-P-P-P-P-35-P-90
