# Supplementary material for: Comparative Genomic Analysis of Asian Cultivated Rice and Its Wild Progenitor (Oryza rufipogon) Has Revealed Evolutionary Innovation of the Pentatricopeptide Repeat Gene Family through Gene Duplication
Source: Int J Mol Sci. 2023 Nov 14;24(22):16313. doi: 10.3390/ijms242216313 (PMC10671101; doi:10.3390/ijms242216313)
Supplement: Supplementary file 1 [file ijms-24-16313-s001.zip › Table S6.xlsx]

## Sheet: Sheet1
Table S6. Characteristics of segmental duplications in the O. sativa genome.
SD1	SD2	SD-identity	SD-kimura-distance	Gene1	Gene2	Gene blast similarity	Gene1 completeness	Gene2 completeness	Gene1 type	Gene2 type	Gene1-exon-num	Gene1-motif-num	Gene1-motif-structure	Gene2-exon-num	Gene2-motif-num	Gene2-motif-structure
nipChr1_9963189_9968051__	nipChr12_3566021_3570789__	0.952463	0.0492001	LOC_Os01g17320	LOC_Os12g07260	95.098	Incomplete	Incomplete	P	P	3	7	173-P-34-P-34-P-67-P-P-P-P-57	4	6	242-P-34-P-67-P-P-P-P-57
nipChr1_14264303_14267384__	nipChr9_3935135_3938208__	0.967122	0.0337048	LOC_Os01g25270	LOC_Os09g07780	96.469	Incomplete	Incomplete	DYW	DYW	1	21	36-S1-P1-32-S1-P1-L1-S1-P1-L1-S1-P1-L1-S1-P1-L1-S1-P2-L2-S2-E1-E2-DYW	1	22	3-L1-S1-P1-32-S1-P1-L1-S1-P1-L1-S1-P1-L1-S1-P1-L1-S1-P2-L2-S2-E1-E2-DYW
nipChr11_26456304_26473918_+	nipChr2_25939026_25952120_+	0.975417	0.025028	LOC_Os11g43800	LOC_Os02g43080	27.202	Incomplete	Complete	P	P	4	18	216-P-55-P-P-P-P-P-P-P-P-P-P-P-P-P-P-P-P-P-21	3	18	98-P-55-P-P-P-P-P-P-P-P-P-P-P-P-P-P-P-P-P-44
nipChr3_4475875_4476961_+	nipChr3_4480978_4482026_+	0.94305	0.059444	LOC_Os03g08680	LOC_Os03g08690	100	Incomplete	Incomplete	E2	unknown	6	10	61-P1-29-L1-S1-P1-33-S1-P2-L2-S2-E1-E2-110	unknown	unknown	unknown
nipChr11_1532684_1535681_+	nipChr3_22236124_22238505_+	0.940305	0.0625805	LOC_Os11g03850	LOC_Os03g40020	28.788	Incomplete	Incomplete	P	P	1	6	77-P-P-P-P-P-P	1	17	73-P-37-P-P-P-P-P-P-P-P-P-P-P-P-P-P-P-33-P-3
nipChr3_33744113_33745602_+	nipChr3_34954011_34955130_+	0.945255	0.0570781	LOC_Os03g59264	LOC_Os03g61670	82.673	Incomplete	Incomplete	E1	unknown	10	18	81-S1-P1-L1-S1-SS-SS-P1-L1-S1-SS-SS-P1-L1-S1-P2-L2-S2-E1-486	unknown	unknown	unknown
nipChr4_7881124_7898144_+	nipChr5_13783088_13799662_+	0.980729	0.019555	LOC_Os04g14130	LOC_Os05g23960	98.201	Incomplete	Complete	DYW	DYW	1	21	27-L1-S1-P1-L1-S1-P1-L1-S1-SS-P1-L1-S1-P1-L1-S1-P2-L2-S2-E1-E2-DYW	3	20	50-S1-P1-L1-S1-P1-L1-S1-SS-P1-L1-S1-P1-L1-S1-P2-L2-S2-E1-E2-DYW
nipChr4_23163376_23164967_+	nipChr5_29061775_29063364_+	0.996222	0.00379059	LOC_Os04g39000	LOC_Os05g50690	26.364	Incomplete	Incomplete	P	P	1	4	1-P-P-P-P-20	3	11	1-P-P-P-P-P-P-P-P-P-P-P-80
nipChr4_7881124_7898144_+	nipChr5_13783088_13799662_+	0.980729	0.019555	LOC_Os04g14130	LOC_Os05g23960	98.201	Incomplete	Complete	DYW	DYW	1	21	27-L1-S1-P1-L1-S1-P1-L1-S1-SS-P1-L1-S1-P1-L1-S1-P2-L2-S2-E1-E2-DYW	3	20	50-S1-P1-L1-S1-P1-L1-S1-SS-P1-L1-S1-P1-L1-S1-P2-L2-S2-E1-E2-DYW
nipChr5_13930671_13932562__	nipChr5_14414460_14416368__	0.934252	0.0691831	LOC_Os05g24150	LOC_Os05g24890	23.42	Incomplete	Incomplete	E2	E2	5	15	44-L1-37-P1-L1-S1-P1-L1-S1-P1-L1-S1-P2-L2-S2-E1-E2-175	2	12	162-S1-P1-L1-S1-P1-L1-S1-P2-L2-S2-E1-E2-52
nipChr5_13930671_13932562__	nipChr5_14414460_14416368__	0.934252	0.0691831	LOC_Os05g24150	LOC_Os05g24890	23.42	Incomplete	Incomplete	E2	E2	5	15	44-L1-37-P1-L1-S1-P1-L1-S1-P1-L1-S1-P2-L2-S2-E1-E2-175	2	12	162-S1-P1-L1-S1-P1-L1-S1-P2-L2-S2-E1-E2-52
nipChr11_26527661_26529946_+	nipChr5_20498584_20500784_+	0.946069	0.0563099	LOC_Os11g43934	LOC_Os05g34570	23.504	Incomplete	Incomplete	DYW	E+	2	13	119-S1-36-L1-S1-SS-P1-L1-S1-P2-L2-S2-E1-E2-DYW	4	11	33-S1-36-L1-S1-SS-SS-38-P2-L2-S2-E1-E2-E+
nipChr4_23163376_23164967_+	nipChr5_29061775_29063364_+	0.996222	0.00379059	LOC_Os04g39000	LOC_Os05g50690	26.364	Incomplete	Incomplete	P	P	1	4	1-P-P-P-P-20	3	11	1-P-P-P-P-P-P-P-P-P-P-P-80
nipChr12_3236395_3239108__	nipChr7_5584434_5587490__	0.954636	0.0468241	LOC_Os12g06670	LOC_Os07g10400	88.125	Incomplete	Incomplete	unknown	E2	unknown	unknown	unknown	7	15	48-S1-P1-L1-S1-P1-L1-S1-P1-L1-S1-P2-L2-S2-E1-E2-172
nipChr7_11849145_11852248_+	nipChr9_22007648_22011541_+	0.948192	0.0537513	LOC_Os07g20510	LOC_Os09g38210	92.164	Incomplete	Incomplete	P	unknown	8	22	173-P-P-P-P-P-P-P-P-P-P-P-P-P-P-P-P-P-P-P-P-P-P-319	unknown	unknown	unknown
nipChr8_374118_376234__	nipChr8_536847_538852__	0.930175	0.0735419	LOC_Os08g01640	LOC_Os08g01870	74.118	Incomplete	Incomplete	P	P	1	19	90-P-P-P-P-P-P-P-P-P-P-P-P-P-P-P-P-P-P-P-36	1	17	95-P-P-P-P-P-P-P-P-P-P-P-P-P-P-P-P-P-103
nipChr8_374118_376234__	nipChr8_536847_538852__	0.930175	0.0735419	LOC_Os08g01640	LOC_Os08g01870	74.118	Incomplete	Incomplete	P	P	1	19	90-P-P-P-P-P-P-P-P-P-P-P-P-P-P-P-P-P-P-P-36	1	17	95-P-P-P-P-P-P-P-P-P-P-P-P-P-P-P-P-P-103
nipChr1_14264303_14267384__	nipChr9_3935135_3938208__	0.967122	0.0337048	LOC_Os01g25270	LOC_Os09g07780	96.469	Incomplete	Incomplete	DYW	DYW	1	21	36-S1-P1-32-S1-P1-L1-S1-P1-L1-S1-P1-L1-S1-P1-L1-S1-P2-L2-S2-E1-E2-DYW	1	22	3-L1-S1-P1-32-S1-P1-L1-S1-P1-L1-S1-P1-L1-S1-P1-L1-S1-P2-L2-S2-E1-E2-DYW
nipChr10_18834618_18835871_+	nipChr10_18847143_18848396_+	0.956105	0.0453045	LOC_Os10g35240	LOC_Os10g35260	21.777	Incomplete	Incomplete	P	P	2	19	19-P-37-P-P-P-P-P-P-P-P-P-P-P-P-P-P-P-P-P-P-57	4	8	193-P-38-P-P-P-P-P-P-P-2
nipChr10_18833510_18835904___d2	nipChr10_18951764_18953574__	0.920994	0.0838564	LOC_Os10g35240	LOC_Os10g35440	22.564	Incomplete	Incomplete	P	P	2	19	19-P-37-P-P-P-P-P-P-P-P-P-P-P-P-P-P-P-P-P-P-57	1	5	14-P-37-P-P-38-P-P-1
nipChr10_18833510_18835904___d3	nipChr10_18935846_18938228__	0.924853	0.0795911	LOC_Os10g35240	LOC_Os10g35436	87.666	Incomplete	Incomplete	P	P	2	19	19-P-37-P-P-P-P-P-P-P-P-P-P-P-P-P-P-P-P-P-P-57	9	19	18-P-37-P-P-P-P-P-P-P-P-P-P-P-P-P-P-P-P-P-P-71
nipChr10_18847151_18848392__	nipChr10_18935883_18937121__	0.911955	0.094004	LOC_Os10g35260	LOC_Os10g35436	21.053	Incomplete	Incomplete	P	P	4	8	193-P-38-P-P-P-P-P-P-P-2	9	19	18-P-37-P-P-P-P-P-P-P-P-P-P-P-P-P-P-P-P-P-P-71
nipChr10_18834618_18835871_+	nipChr10_18847143_18848396_+	0.956105	0.0453045	LOC_Os10g35240	LOC_Os10g35260	21.777	Incomplete	Incomplete	P	P	2	19	19-P-37-P-P-P-P-P-P-P-P-P-P-P-P-P-P-P-P-P-P-57	4	8	193-P-38-P-P-P-P-P-P-P-2
nipChr10_18935676_18938576_+	nipChr10_18951605_18953897_+	0.93687	0.0661316	LOC_Os10g35436	LOC_Os10g35440	27.451	Incomplete	Incomplete	P	P	9	19	18-P-37-P-P-P-P-P-P-P-P-P-P-P-P-P-P-P-P-P-P-71	1	5	14-P-37-P-P-38-P-P-1
nipChr10_18847151_18848392__	nipChr10_18935883_18937121__	0.911955	0.094004	LOC_Os10g35260	LOC_Os10g35436	21.053	Incomplete	Incomplete	P	P	4	8	193-P-38-P-P-P-P-P-P-P-2	9	19	18-P-37-P-P-P-P-P-P-P-P-P-P-P-P-P-P-P-P-P-P-71
nipChr10_18833510_18835904___d3	nipChr10_18935846_18938228__	0.924853	0.0795911	LOC_Os10g35240	LOC_Os10g35436	87.666	Incomplete	Incomplete	P	P	2	19	19-P-37-P-P-P-P-P-P-P-P-P-P-P-P-P-P-P-P-P-P-57	9	19	18-P-37-P-P-P-P-P-P-P-P-P-P-P-P-P-P-P-P-P-P-71
nipChr10_18935676_18938576_+	nipChr10_18951605_18953897_+	0.93687	0.0661316	LOC_Os10g35436	LOC_Os10g35440	27.451	Incomplete	Incomplete	P	P	9	19	18-P-37-P-P-P-P-P-P-P-P-P-P-P-P-P-P-P-P-P-P-71	1	5	14-P-37-P-P-38-P-P-1
nipChr10_18833510_18835904___d2	nipChr10_18951764_18953574__	0.920994	0.0838564	LOC_Os10g35240	LOC_Os10g35440	22.564	Incomplete	Incomplete	P	P	2	19	19-P-37-P-P-P-P-P-P-P-P-P-P-P-P-P-P-P-P-P-P-57	1	5	14-P-37-P-P-38-P-P-1
nipChr10_19104118_19105897_+	nipChr10_19109020_19111036_+	0.941245	0.0613191	LOC_Os10g35730	LOC_Os10g35750	67.971	Incomplete	Incomplete	P	P	2	7	12-P-32-P-40-P-P-P-P-P-12	2	10	113-P-P-32-P-P-P-P-P-P-P-35-P-12
nipChr10_19104118_19105897_+	nipChr10_19109020_19111036_+	0.941245	0.0613191	LOC_Os10g35730	LOC_Os10g35750	67.971	Incomplete	Incomplete	P	P	2	7	12-P-32-P-40-P-P-P-P-P-12	2	10	113-P-P-32-P-P-P-P-P-P-P-35-P-12
nipChr11_127246_139350_+	nipChr12_126387_136332_+	0.963054	0.0379225	LOC_Os11g01210	LOC_Os12g01210	99.632	Complete	Incomplete	P	P	1	11	48-P-P-P-43-P-P-P-P-P-P-P-P-62	1	12	128-P-39-P-P-P-43-P-P-P-P-P-P-P-P-62
nipChr11_454494_456877_+	nipChr12_531051_533437_+	0.960974	0.0401771	LOC_Os11g01860	LOC_Os12g01910	93.707	Incomplete	Incomplete	E2	E2	1	20	23-S1-P1-L1-S1-P1-L1-S1-P1-L1-S1-P1-L1-32-P1-L1-S1-P2-L2-S2-E1-E2-9	4	20	21-SS-P1-L1-S1-P1-L1-S1-P1-L1-S1-P1-L1-32-P1-L1-S1-P2-L2-S2-E1-E2-150
nipChr11_650570_675701_+	nipChr12_695974_722335_+	0.949991	0.0517918	LOC_Os11g02310	LOC_Os12g02280	21.93	Complete	Complete	E1	E2	4	10	L1-S1-SS-SS-P1-L1-S1-P2-33-S2-E1	3	12	L1-65-L1-S1-SS-SS-P1-L1-S1-P2-33-S2-E1-E2-10
nipChr11_1422540_1444901_+	nipChr12_1329114_1357278_+	0.944825	0.0574538	LOC_Os11g03690	LOC_Os12g03450	94.426	Complete	Complete	DYW	DYW	1	9	176-S1-44-L1-S1-P2-L2-S2-E1-E2-DYW	1	10	157-SS-P1-L1-S1-P2-L2-S2-E1-E2-DYW
nipChr11_1532684_1535681_+	nipChr3_22236124_22238505_+	0.940305	0.0625805	LOC_Os11g03850	LOC_Os03g40020	28.788	Incomplete	Incomplete	P	P	1	6	77-P-P-P-P-P-P	1	17	73-P-37-P-P-P-P-P-P-P-P-P-P-P-P-P-P-P-33-P-3
nipChr11_1773199_1786790_+	nipChr12_1714193_1724354_+	0.962214	0.0388509	LOC_Os11g04290	LOC_Os12g04110	88.304	Complete	Incomplete	unknown	P	unknown	unknown	unknown	8	17	871-P-P-P-P-P-P-P-P-P-P-P-P-P-P-P-P-50-P-78
nipChr11_1773199_1786790_+	nipChr12_1714193_1724354_+	0.962214	0.0388509	LOC_Os11g04295	LOC_Os12g04110	96.602	Complete	Incomplete	P	P	2	17	98-P-P-P-P-P-P-P-P-P-P-P-P-P-P-P-P-50-P-79	8	17	871-P-P-P-P-P-P-P-P-P-P-P-P-P-P-P-P-50-P-78
nipChr11_1773199_1786790_+	nipChr12_1714193_1724354_+	0.962214	0.0388509	LOC_Os11g04300	LOC_Os12g04110	91.078	Incomplete	Incomplete	unknown	P	unknown	unknown	unknown	8	17	871-P-P-P-P-P-P-P-P-P-P-P-P-P-P-P-P-50-P-78
nipChr11_26456304_26473918_+	nipChr2_25939026_25952120_+	0.975417	0.025028	LOC_Os11g43800	LOC_Os02g43080	27.202	Incomplete	Complete	P	P	4	18	216-P-55-P-P-P-P-P-P-P-P-P-P-P-P-P-P-P-P-P-21	3	18	98-P-55-P-P-P-P-P-P-P-P-P-P-P-P-P-P-P-P-P-44
nipChr11_26527661_26529946_+	nipChr5_20498584_20500784_+	0.946069	0.0563099	LOC_Os11g43934	LOC_Os05g34570	23.504	Incomplete	Incomplete	DYW	E+	2	13	119-S1-36-L1-S1-SS-P1-L1-S1-P2-L2-S2-E1-E2-DYW	4	11	33-S1-36-L1-S1-SS-SS-38-P2-L2-S2-E1-E2-E+
nipChr11_127246_139350_+	nipChr12_126387_136332_+	0.963054	0.0379225	LOC_Os11g01210	LOC_Os12g01210	99.632	Complete	Incomplete	P	P	1	11	48-P-P-P-43-P-P-P-P-P-P-P-P-62	1	12	128-P-39-P-P-P-43-P-P-P-P-P-P-P-P-62
nipChr11_397339_398969__	nipChr12_533964_535591__	0.951462	0.0502984	LOC_Os11g01740	LOC_Os12g01910	85.185	Incomplete	Incomplete	unknown	E2	unknown	unknown	unknown	4	20	21-SS-P1-L1-S1-P1-L1-S1-P1-L1-S1-P1-L1-32-P1-L1-S1-P2-L2-S2-E1-E2-150
nipChr11_454494_456877_+	nipChr12_531051_533437_+	0.960974	0.0401771	LOC_Os11g01860	LOC_Os12g01910	93.707	Incomplete	Incomplete	E2	E2	1	20	23-S1-P1-L1-S1-P1-L1-S1-P1-L1-S1-P1-L1-32-P1-L1-S1-P2-L2-S2-E1-E2-9	4	20	21-SS-P1-L1-S1-P1-L1-S1-P1-L1-S1-P1-L1-32-P1-L1-S1-P2-L2-S2-E1-E2-150
nipChr12_439051_440688__	nipChr12_533964_535585__	0.956983	0.0443331	LOC_Os12g01740	LOC_Os12g01910	85.185	Incomplete	Incomplete	unknown	E2	unknown	unknown	unknown	4	20	21-SS-P1-L1-S1-P1-L1-S1-P1-L1-S1-P1-L1-32-P1-L1-S1-P2-L2-S2-E1-E2-150
nipChr11_650570_675701_+	nipChr12_695974_722335_+	0.949991	0.0517918	LOC_Os11g02310	LOC_Os12g02280	21.93	Complete	Complete	E1	E2	4	10	L1-S1-SS-SS-P1-L1-S1-P2-33-S2-E1	3	12	L1-65-L1-S1-SS-SS-P1-L1-S1-P2-33-S2-E1-E2-10
nipChr11_1422540_1444901_+	nipChr12_1329114_1357278_+	0.944825	0.0574538	LOC_Os11g03690	LOC_Os12g03450	94.426	Complete	Complete	DYW	DYW	1	9	176-S1-44-L1-S1-P2-L2-S2-E1-E2-DYW	1	10	157-SS-P1-L1-S1-P2-L2-S2-E1-E2-DYW
nipChr11_1773199_1786790_+	nipChr12_1714193_1724354_+	0.962214	0.0388509	LOC_Os11g04290	LOC_Os12g04110	88.304	Complete	Incomplete	unknown	P	unknown	unknown	unknown	8	17	871-P-P-P-P-P-P-P-P-P-P-P-P-P-P-P-P-50-P-78
nipChr11_1773199_1786790_+	nipChr12_1714193_1724354_+	0.962214	0.0388509	LOC_Os11g04295	LOC_Os12g04110	96.602	Complete	Incomplete	P	P	2	17	98-P-P-P-P-P-P-P-P-P-P-P-P-P-P-P-P-50-P-79	8	17	871-P-P-P-P-P-P-P-P-P-P-P-P-P-P-P-P-50-P-78
nipChr11_1773199_1786790_+	nipChr12_1714193_1724354_+	0.962214	0.0388509	LOC_Os11g04300	LOC_Os12g04110	91.078	Incomplete	Incomplete	unknown	P	unknown	unknown	unknown	8	17	871-P-P-P-P-P-P-P-P-P-P-P-P-P-P-P-P-50-P-78
nipChr11_1795366_1806418_+	nipChr12_1724703_1737283_+	0.95777	0.0435553	LOC_Os11g04310	LOC_Os12g04110	98.828	Complete	Incomplete	unknown	P	unknown	unknown	unknown	8	17	871-P-P-P-P-P-P-P-P-P-P-P-P-P-P-P-P-50-P-78
nipChr11_1795366_1806418_+	nipChr12_1724703_1737283_+	0.95777	0.0435553	LOC_Os11g04320	LOC_Os12g04110	61.65	Complete	Incomplete	unknown	P	unknown	unknown	unknown	8	17	871-P-P-P-P-P-P-P-P-P-P-P-P-P-P-P-P-50-P-78
nipChr1_9963189_9968051__	nipChr12_3566021_3570789__	0.952463	0.0492001	LOC_Os01g17320	LOC_Os12g07260	95.098	Incomplete	Incomplete	P	P	3	7	173-P-34-P-34-P-67-P-P-P-P-57	4	6	242-P-34-P-67-P-P-P-P-57
