# Supplementary material for: Comparative Genomic Analysis of Asian Cultivated Rice and Its Wild Progenitor (Oryza rufipogon) Has Revealed Evolutionary Innovation of the Pentatricopeptide Repeat Gene Family through Gene Duplication
Source: Int J Mol Sci. 2023 Nov 14;24(22):16313. doi: 10.3390/ijms242216313 (PMC10671101; doi:10.3390/ijms242216313)
Supplement: Supplementary file 1 [file ijms-24-16313-s001.zip › Table S7.xlsx]

## Sheet: Sheet1
Table S7. List of the identified Quantitative Trait Loci (QTLs) in the PPR gene family.
QTL Accession ID	Species Name	Trait Symbol	Published Symbol	Linkage Group	Map	Position	Associated Markers
AQAJ004	Oryza sativa	MALERF	qRf-5	5	Oryza sativa-CNRRI XeiB/Mil46 RI QTL 2002-5	184.4-186 cM	RG119, RG474, RG493, RG346
AQBH002	Oryza sativa	MALERF	NA	10	Oryza sativa-TKU RD21A/IR24 B1F1 QTL 1998-10	47.5-64.7 cM	R2309, RG257, R2946, RZ811
AQBH003	Oryza sativa	MALERF	NA	10	Oryza sativa-TKU RD21A/IR24 B1F1 QTL 1998-10	100.3-106.9 cM	S11148, C1361, S11014, S10019
AQCG003	Oryza sativa	MALERF	qRf-10	10	Oryza sativa-CNRRI Zh97B/Mil46 RI QTL 2002-10	60.4-86.8 cM	RZ811, RZ583, RG561, RZ861, RM171, RM228
AQBH004	Oryza sativa	MALERF	NA	10	Oryza sativa-TKU RD21A/IR24 B1F1 QTL 1998-10	47.5-64.7 cM	R2309, RG257, R2946, RZ811
AQAJ003	Oryza sativa	MALERF	qRf-10-2	10b	Oryza sativa-CNRRI XeiB/Mil46 RI QTL 2002-10b	7.3-17.9 cM	RM258, RZ583, RM171, RZ811, RG241, RZ861
AQAJ001	Oryza sativa	MALERF	qRf-1	1	Oryza sativa-CNRRI XeiB/Mil46 RI QTL 2002-1	48.3-67.9 cM	RG532, RM35, RM151, RG811
AQCG004	Oryza sativa	MALERF	qRf-11	11	Oryza sativa-CNRRI Zh97B/Mil46 RI QTL 2002-11	19.3-37.8 cM	RG118, RM202, RG167, RZ816, RM229
AQCG002	Oryza sativa	MALERF	qRf-7	7	Oryza sativa-CNRRI Zh97B/Mil46 RI QTL 2002-7	39.2-71.7 cM	RZ395, RM18, RZ989, RG650, RM248
AQCG001	Oryza sativa	MALERF	qRf-1	1	Oryza sativa-CNRRI Zh97B/Mil46 RI QTL 2002-1	1.2-38.5 cM	RG472, RZ543, RG313, RM1, RM151, RG532, RG447, RG811
AQAJ002	Oryza sativa	MALERF	qRf-10-1	10a	Oryza sativa-CNRRI XeiB/Mil46 RI QTL 2002-10a	0-11.9 cM	RM311, RG257
AQBH001	Oryza sativa	MALERF	NA	10	Oryza sativa-TKU RD21A/IR24 B1F1 QTL 1998-10	100.3-107.8 cM	S11148, C1361, S10019, S11014, RG134
