# Supplementary figures and images for: Comparative Genomic Analysis of Asian Cultivated Rice and Its Wild Progenitor (Oryza rufipogon) Has Revealed Evolutionary Innovation of the Pentatricopeptide Repeat Gene Family through Gene Duplication
Source: MDPI journal article supplement (doi:10.3390/ijms242216313), 2023-11-14

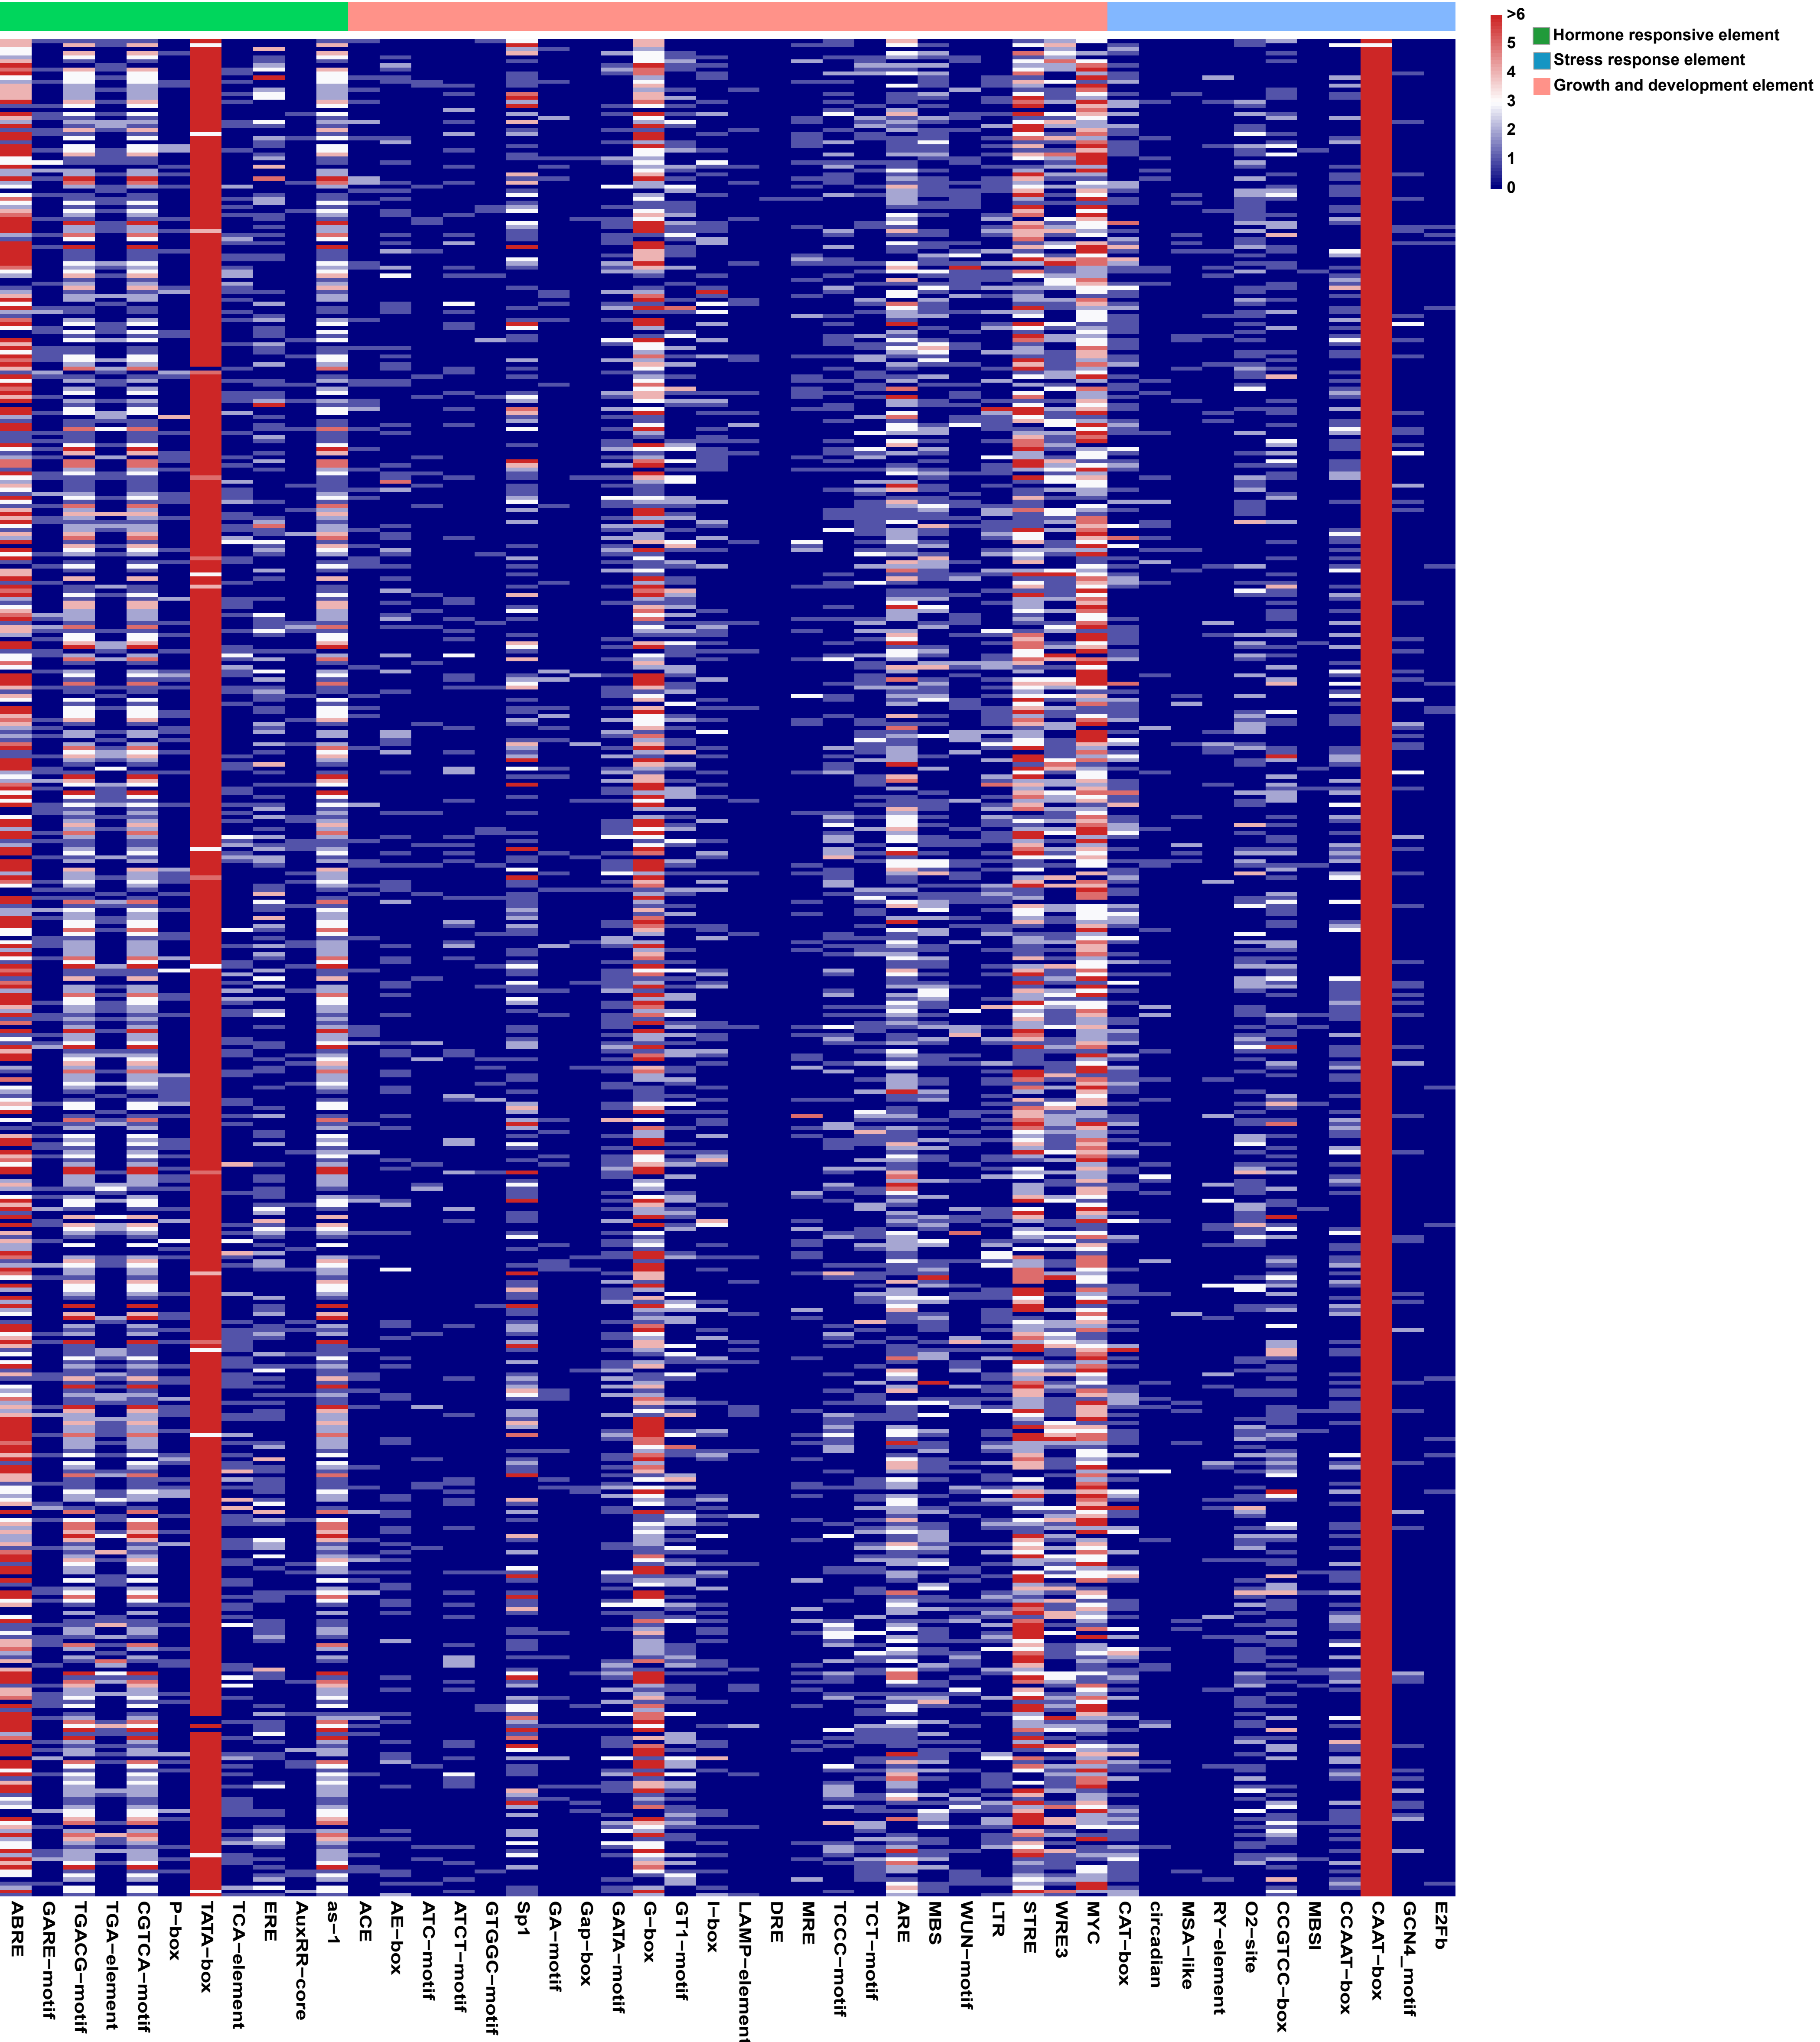

Supplement: s1 [file s1]

a

Oru Chr1:19568356-21576429

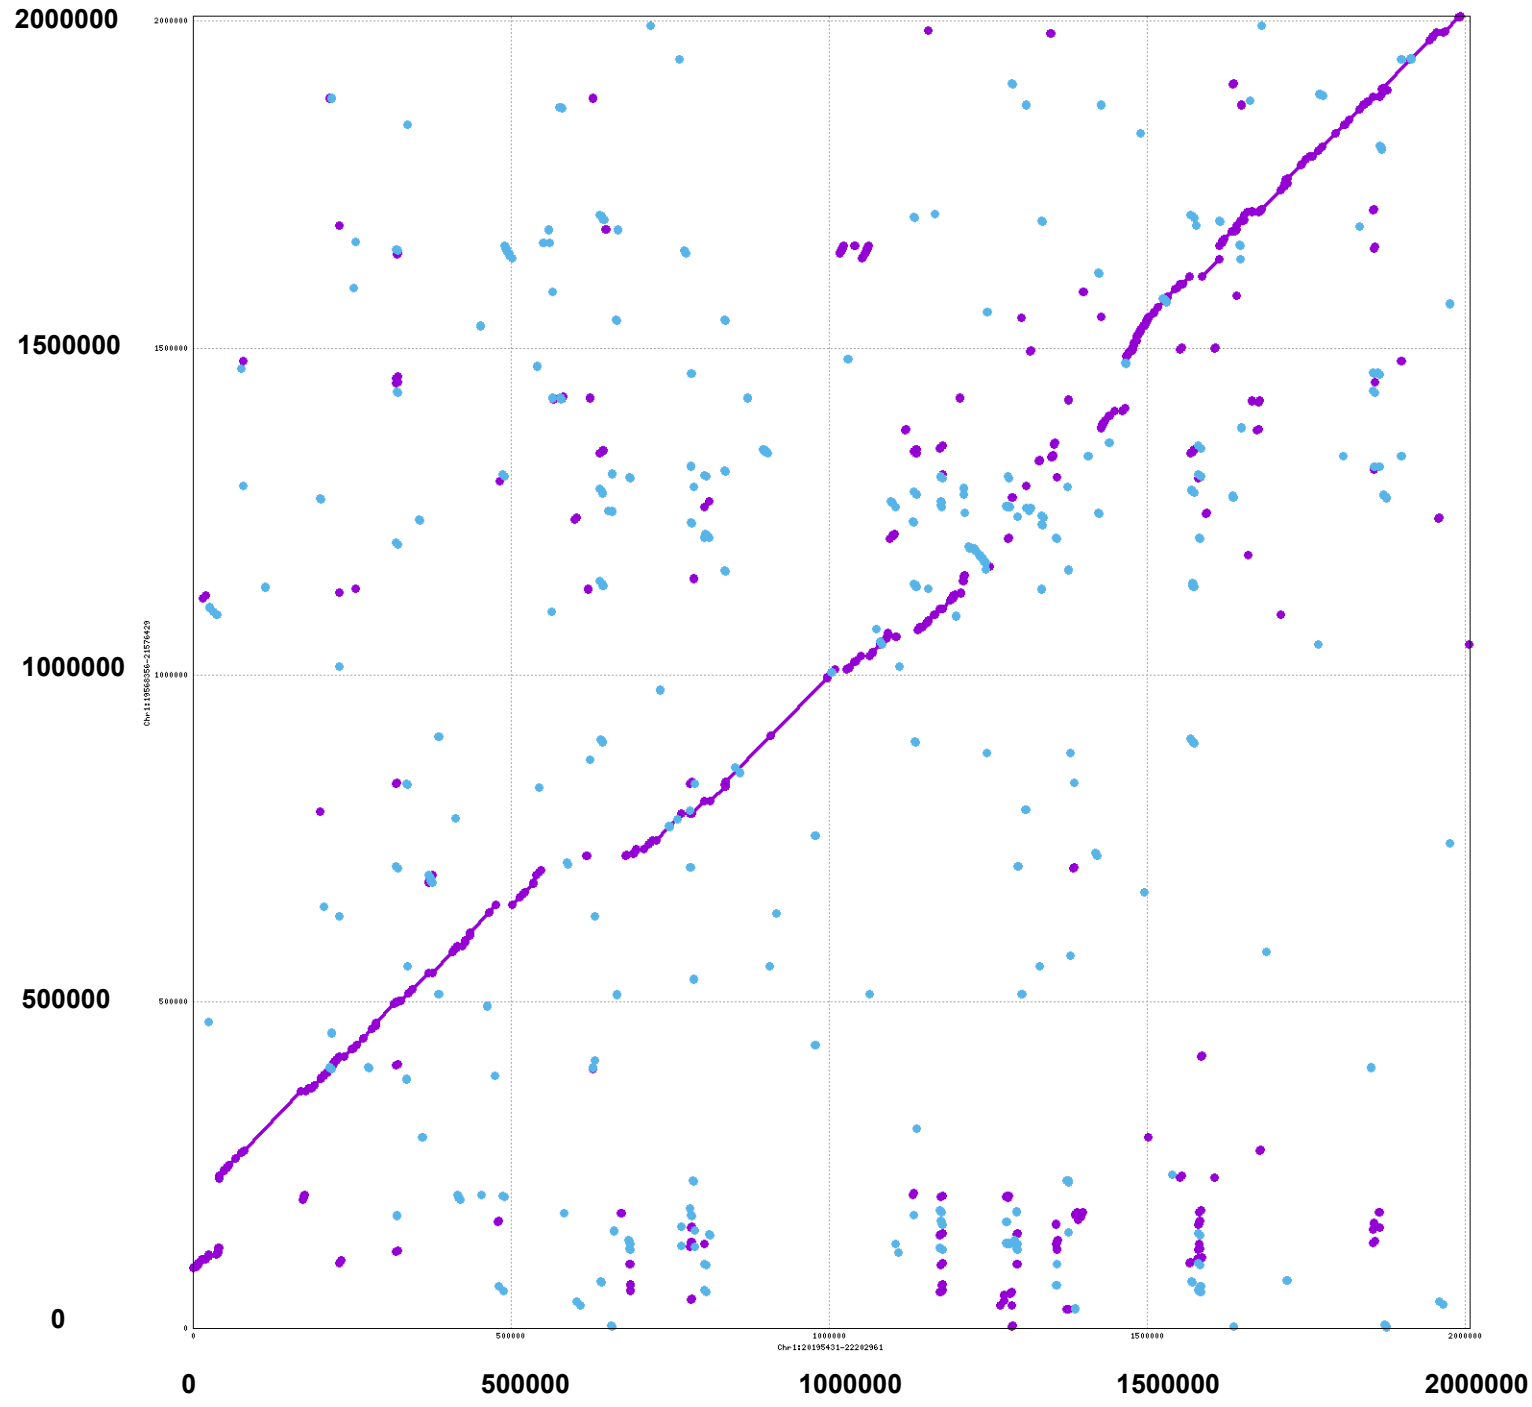

Osa Chr1:20195431-22202961

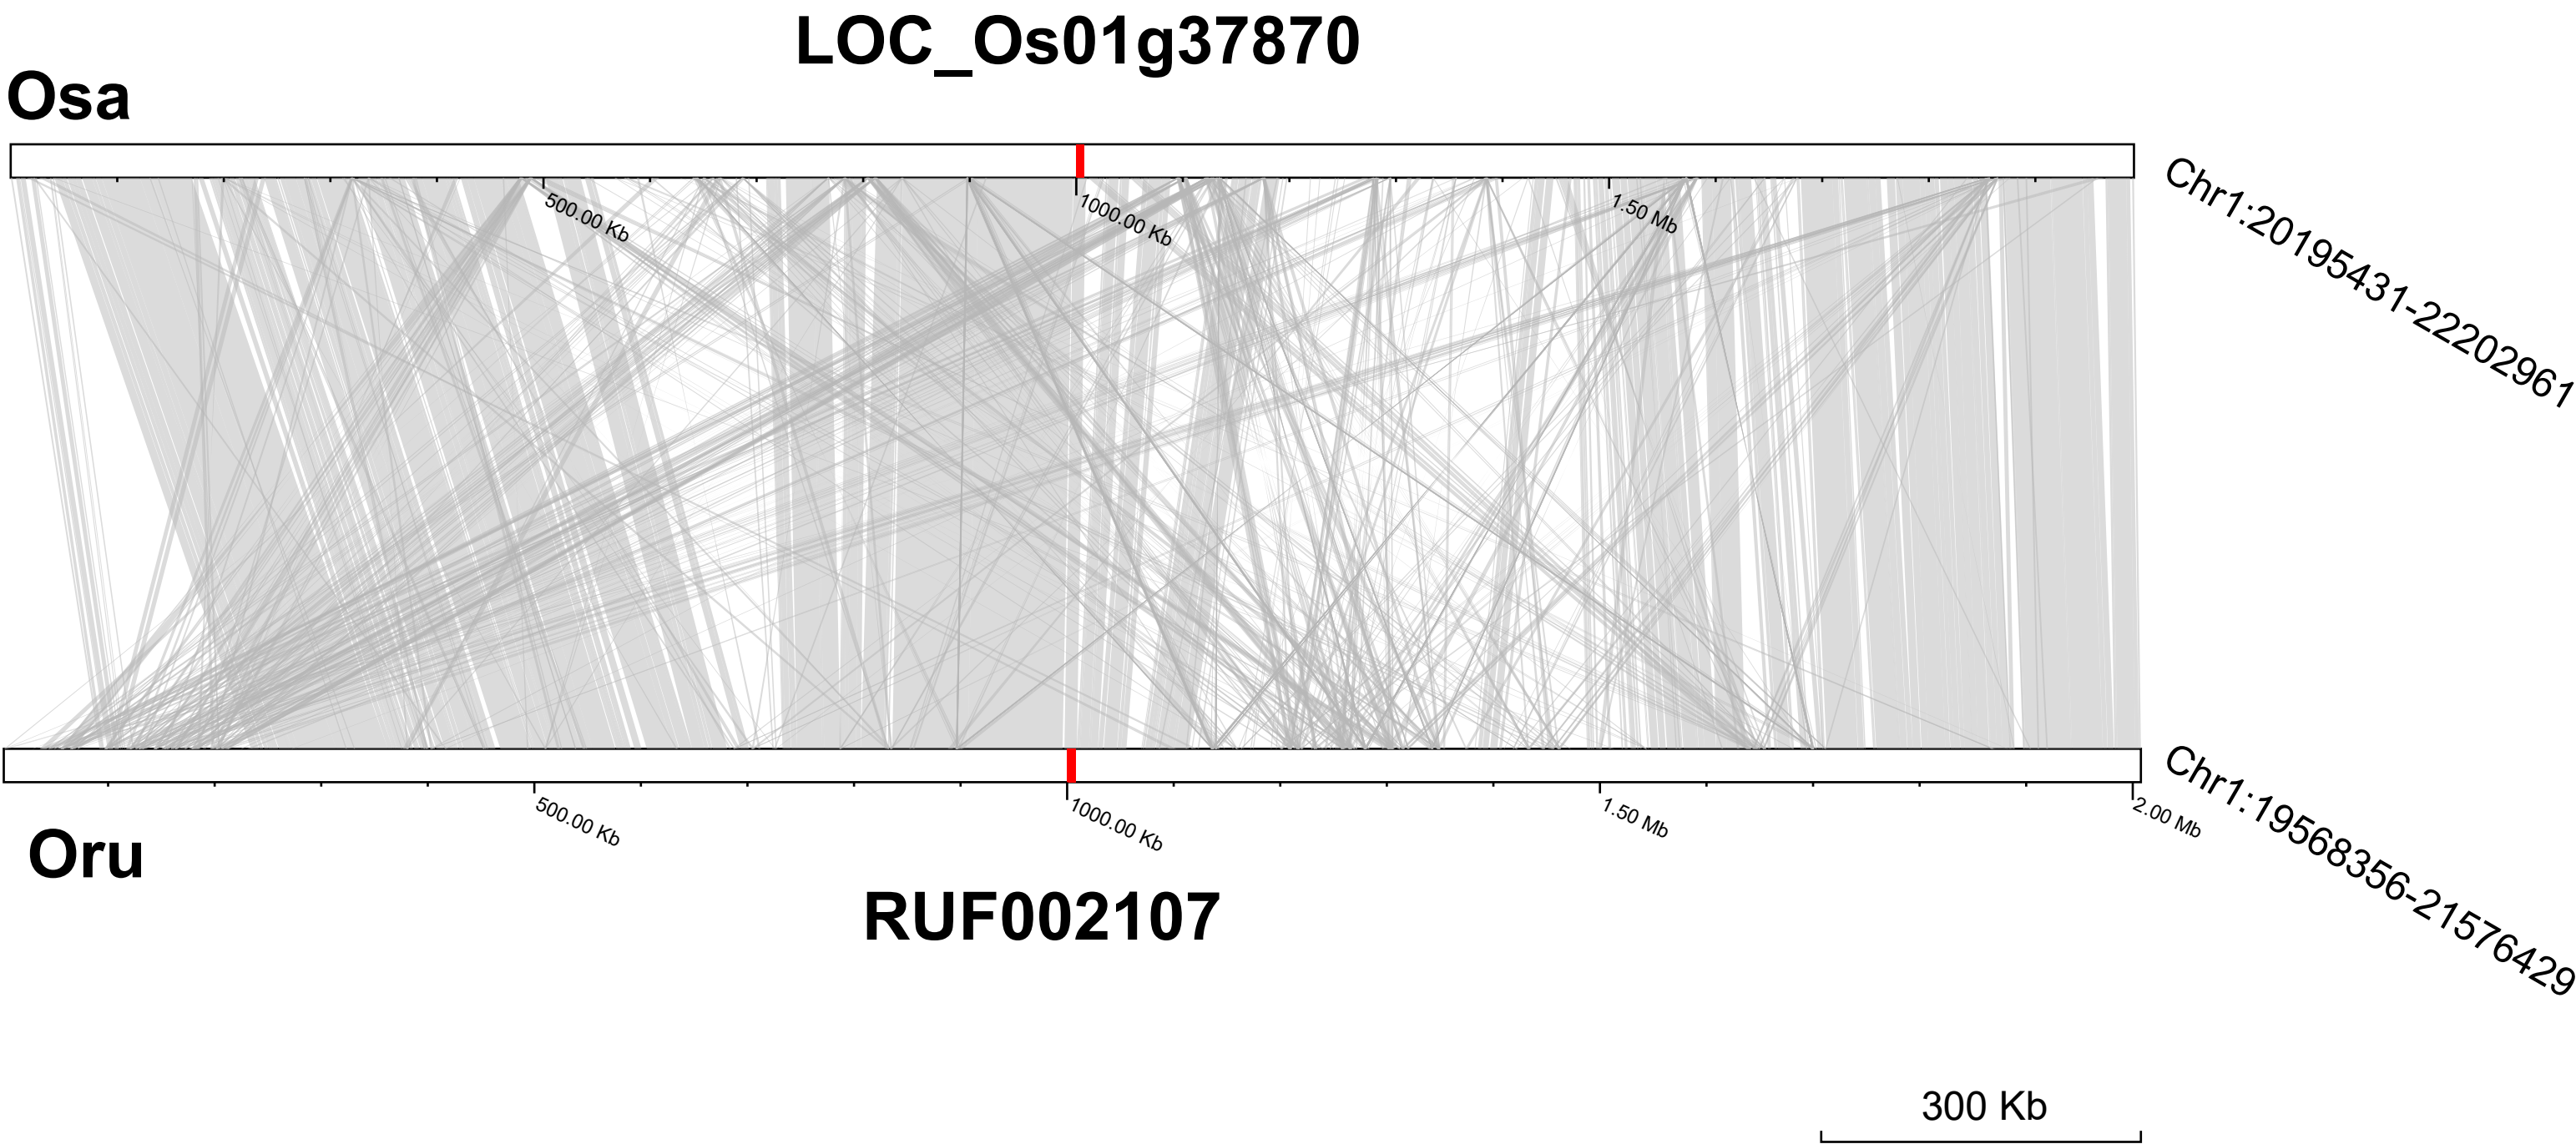

b

Oru Chr11:14810416-16813301

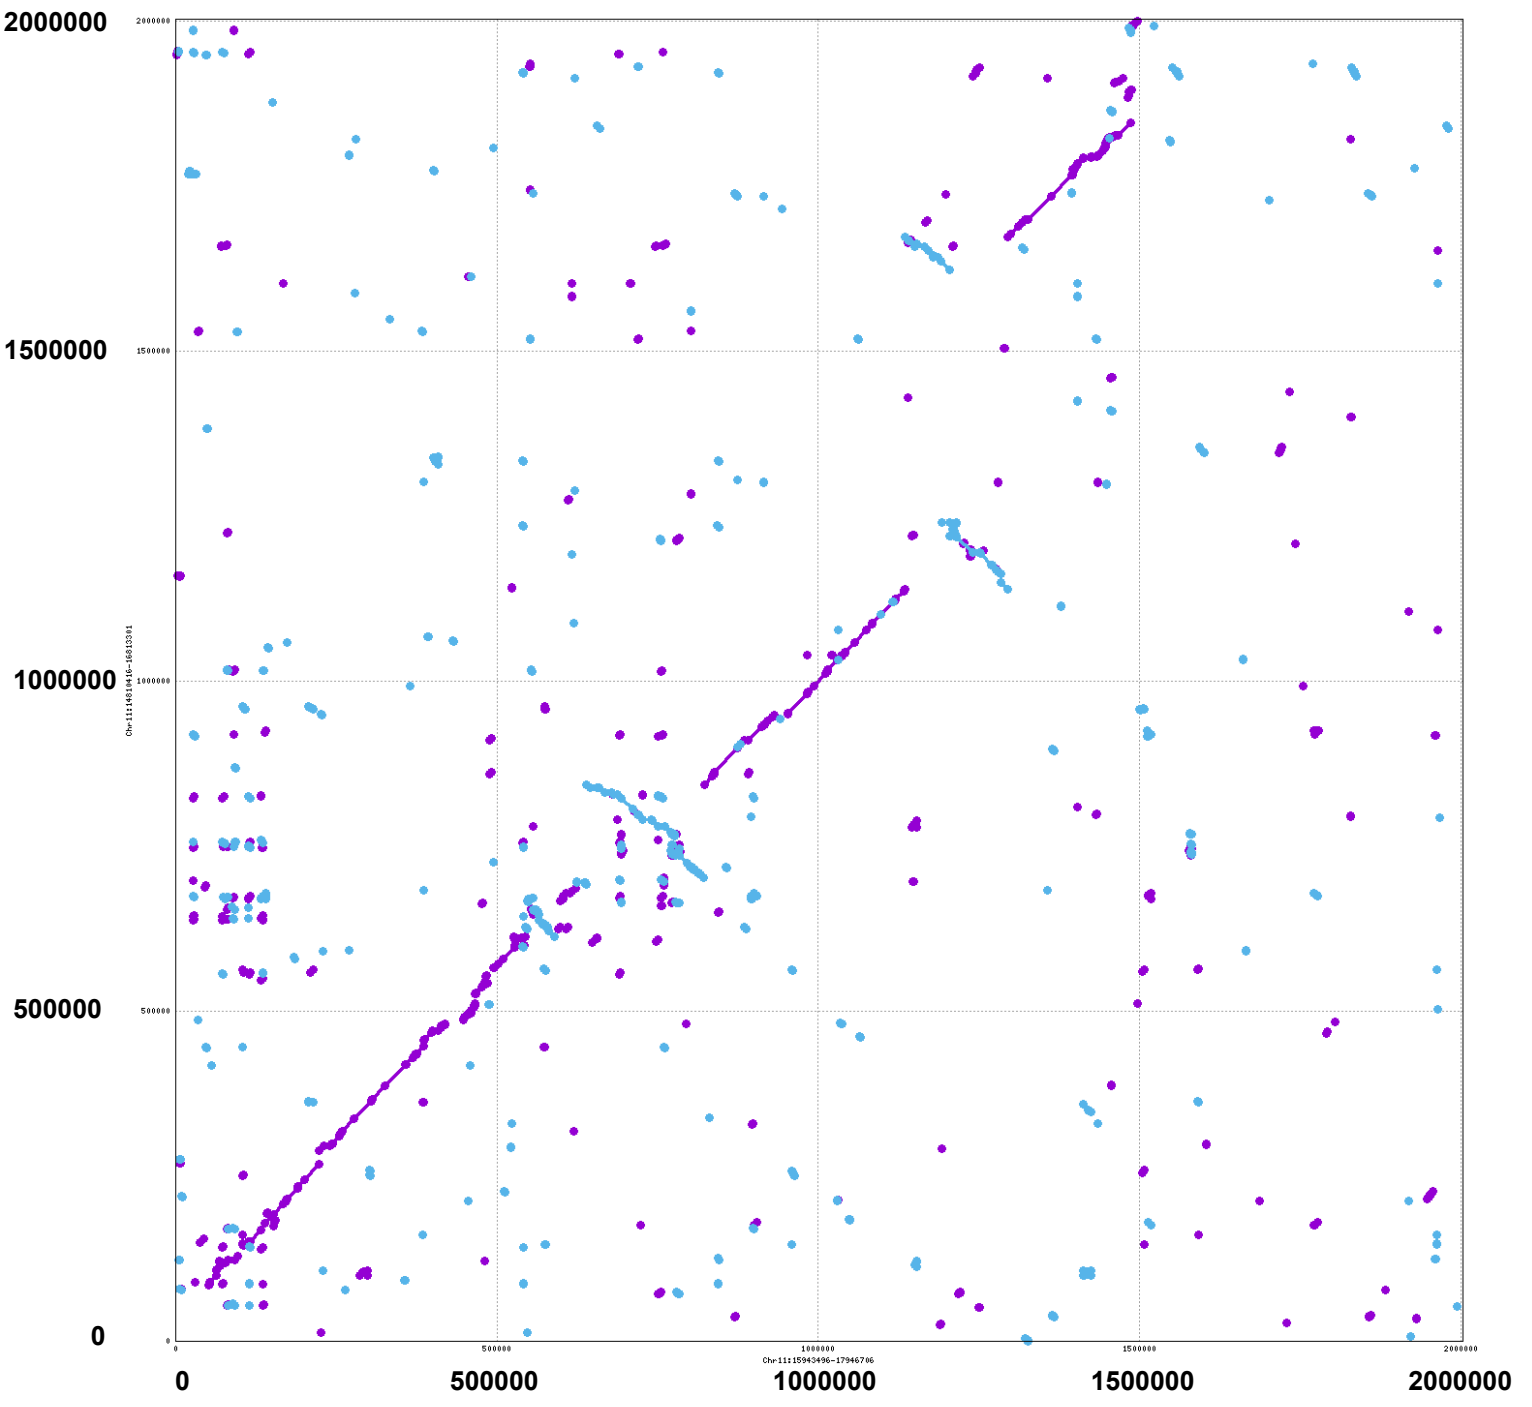

Osa Chr11:15943496-17946706

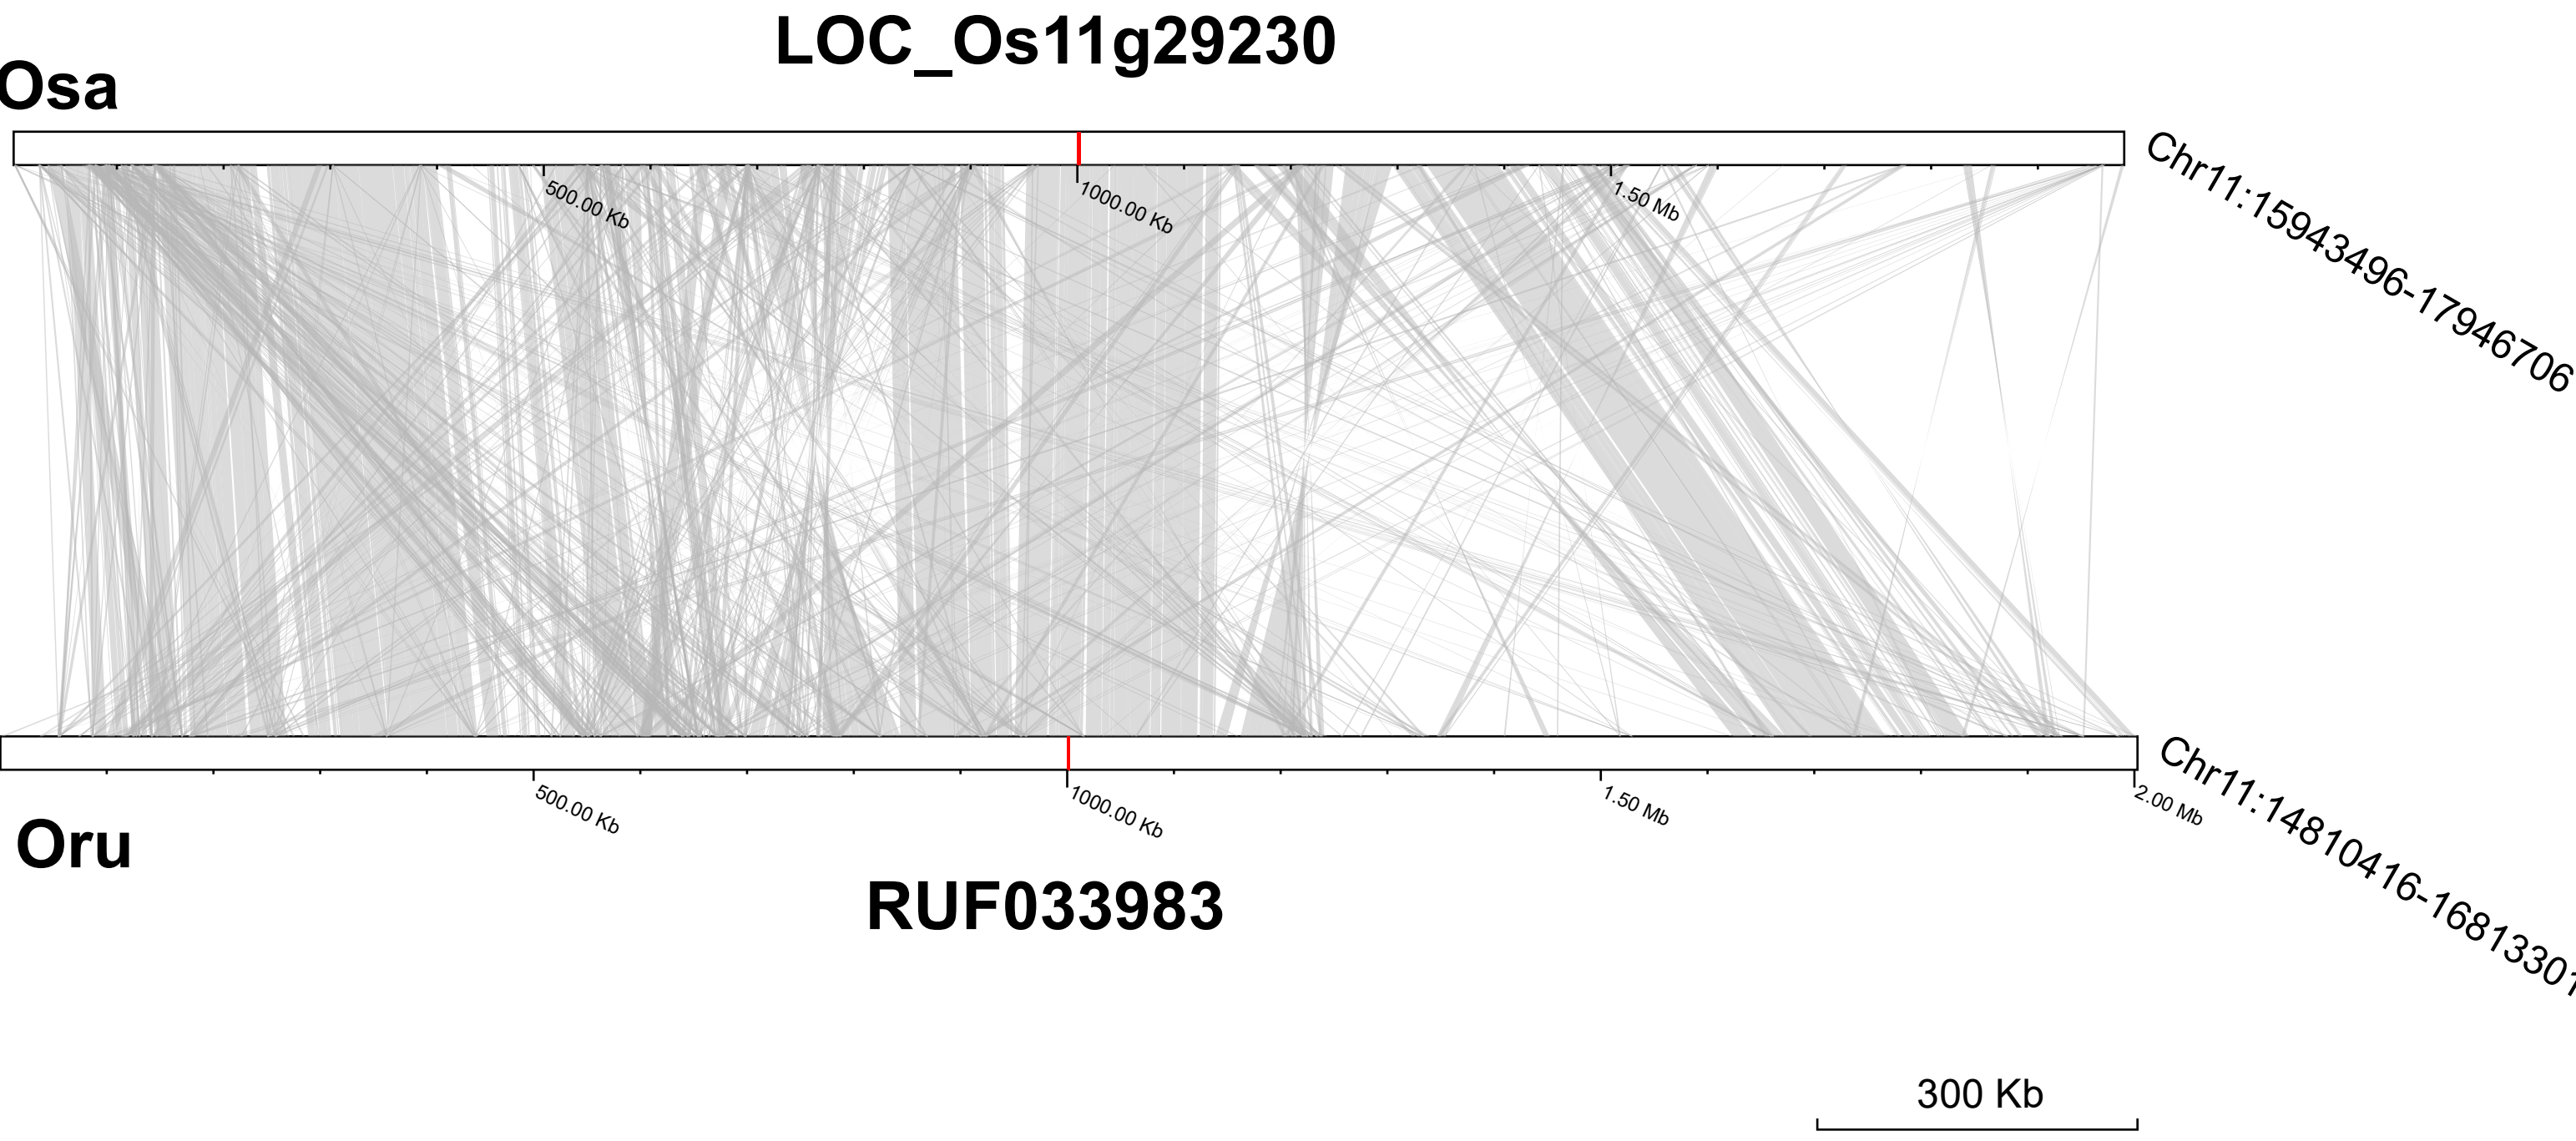

c

Oru Chr11:14903371-16904808

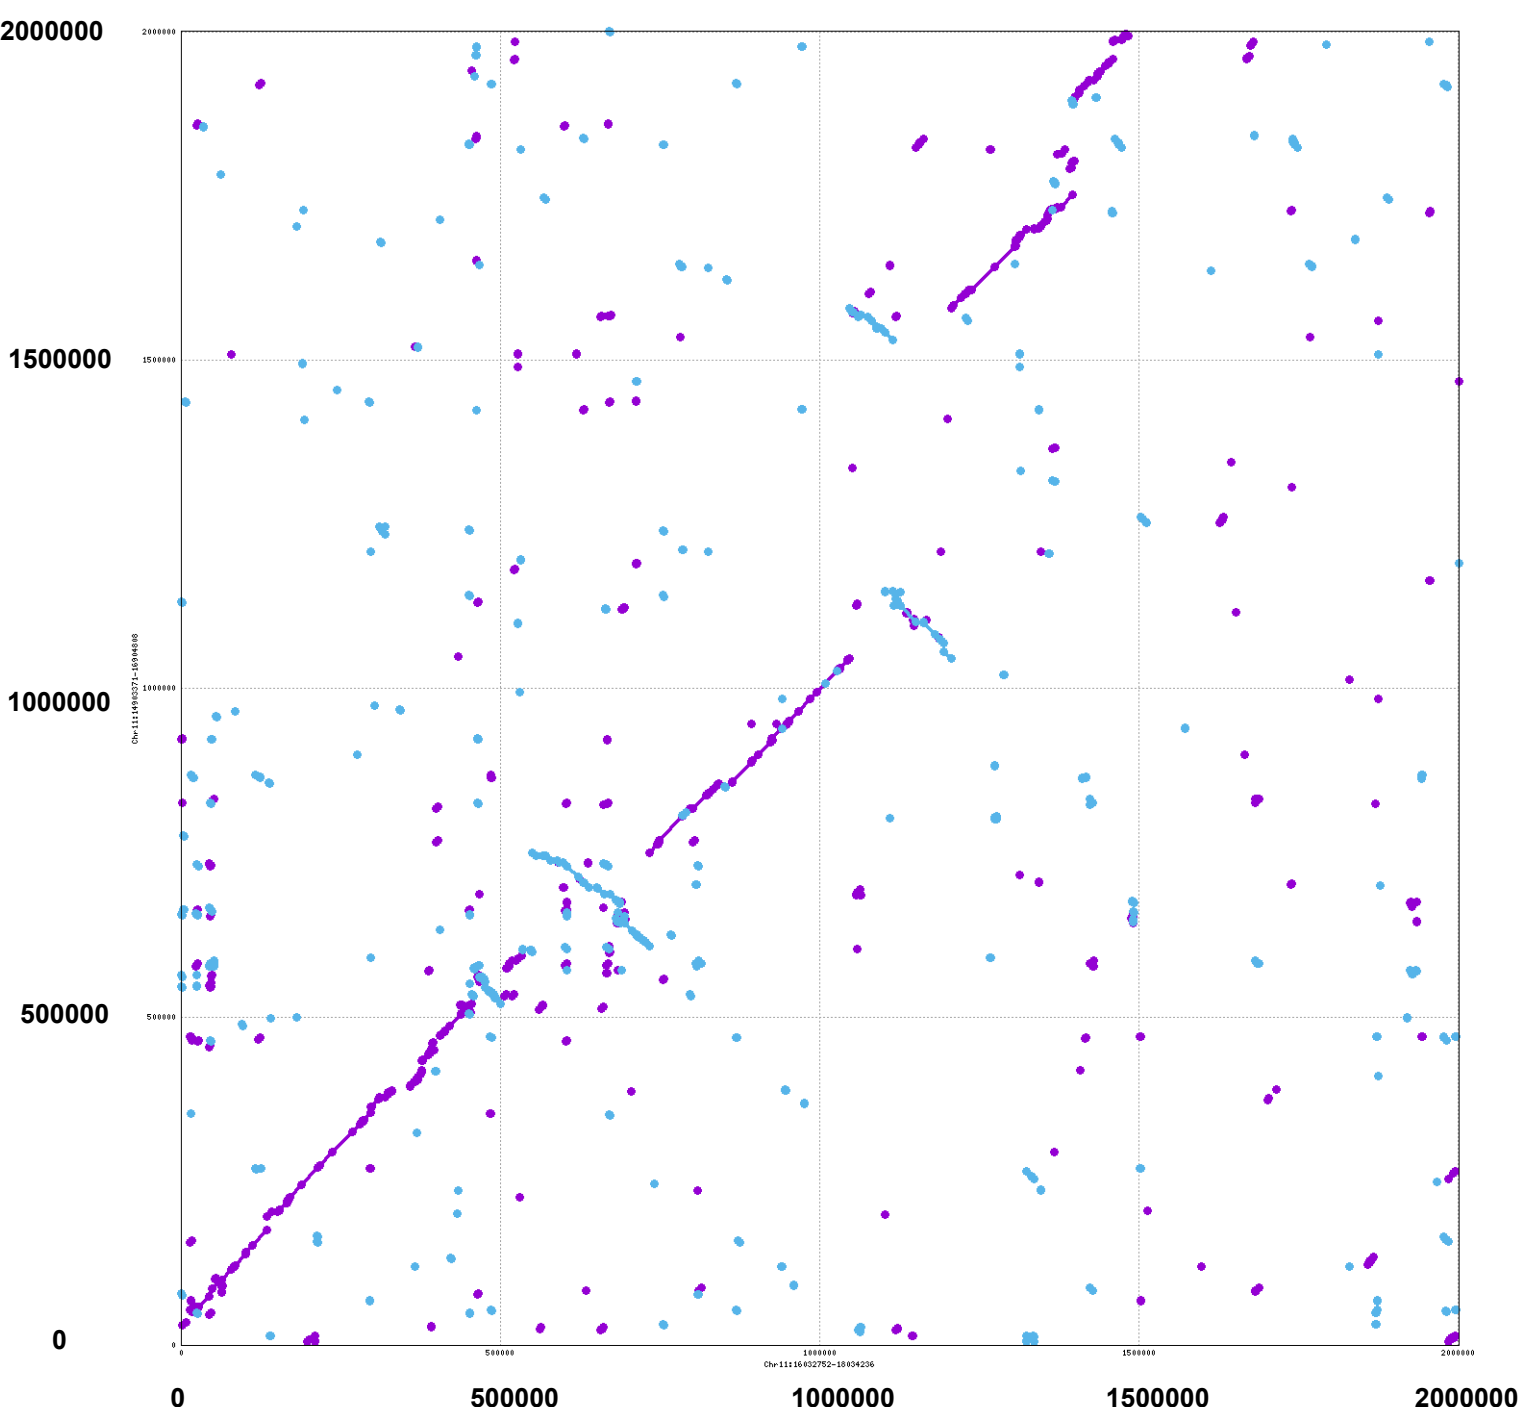

Osa Chr11:16032752-18034236

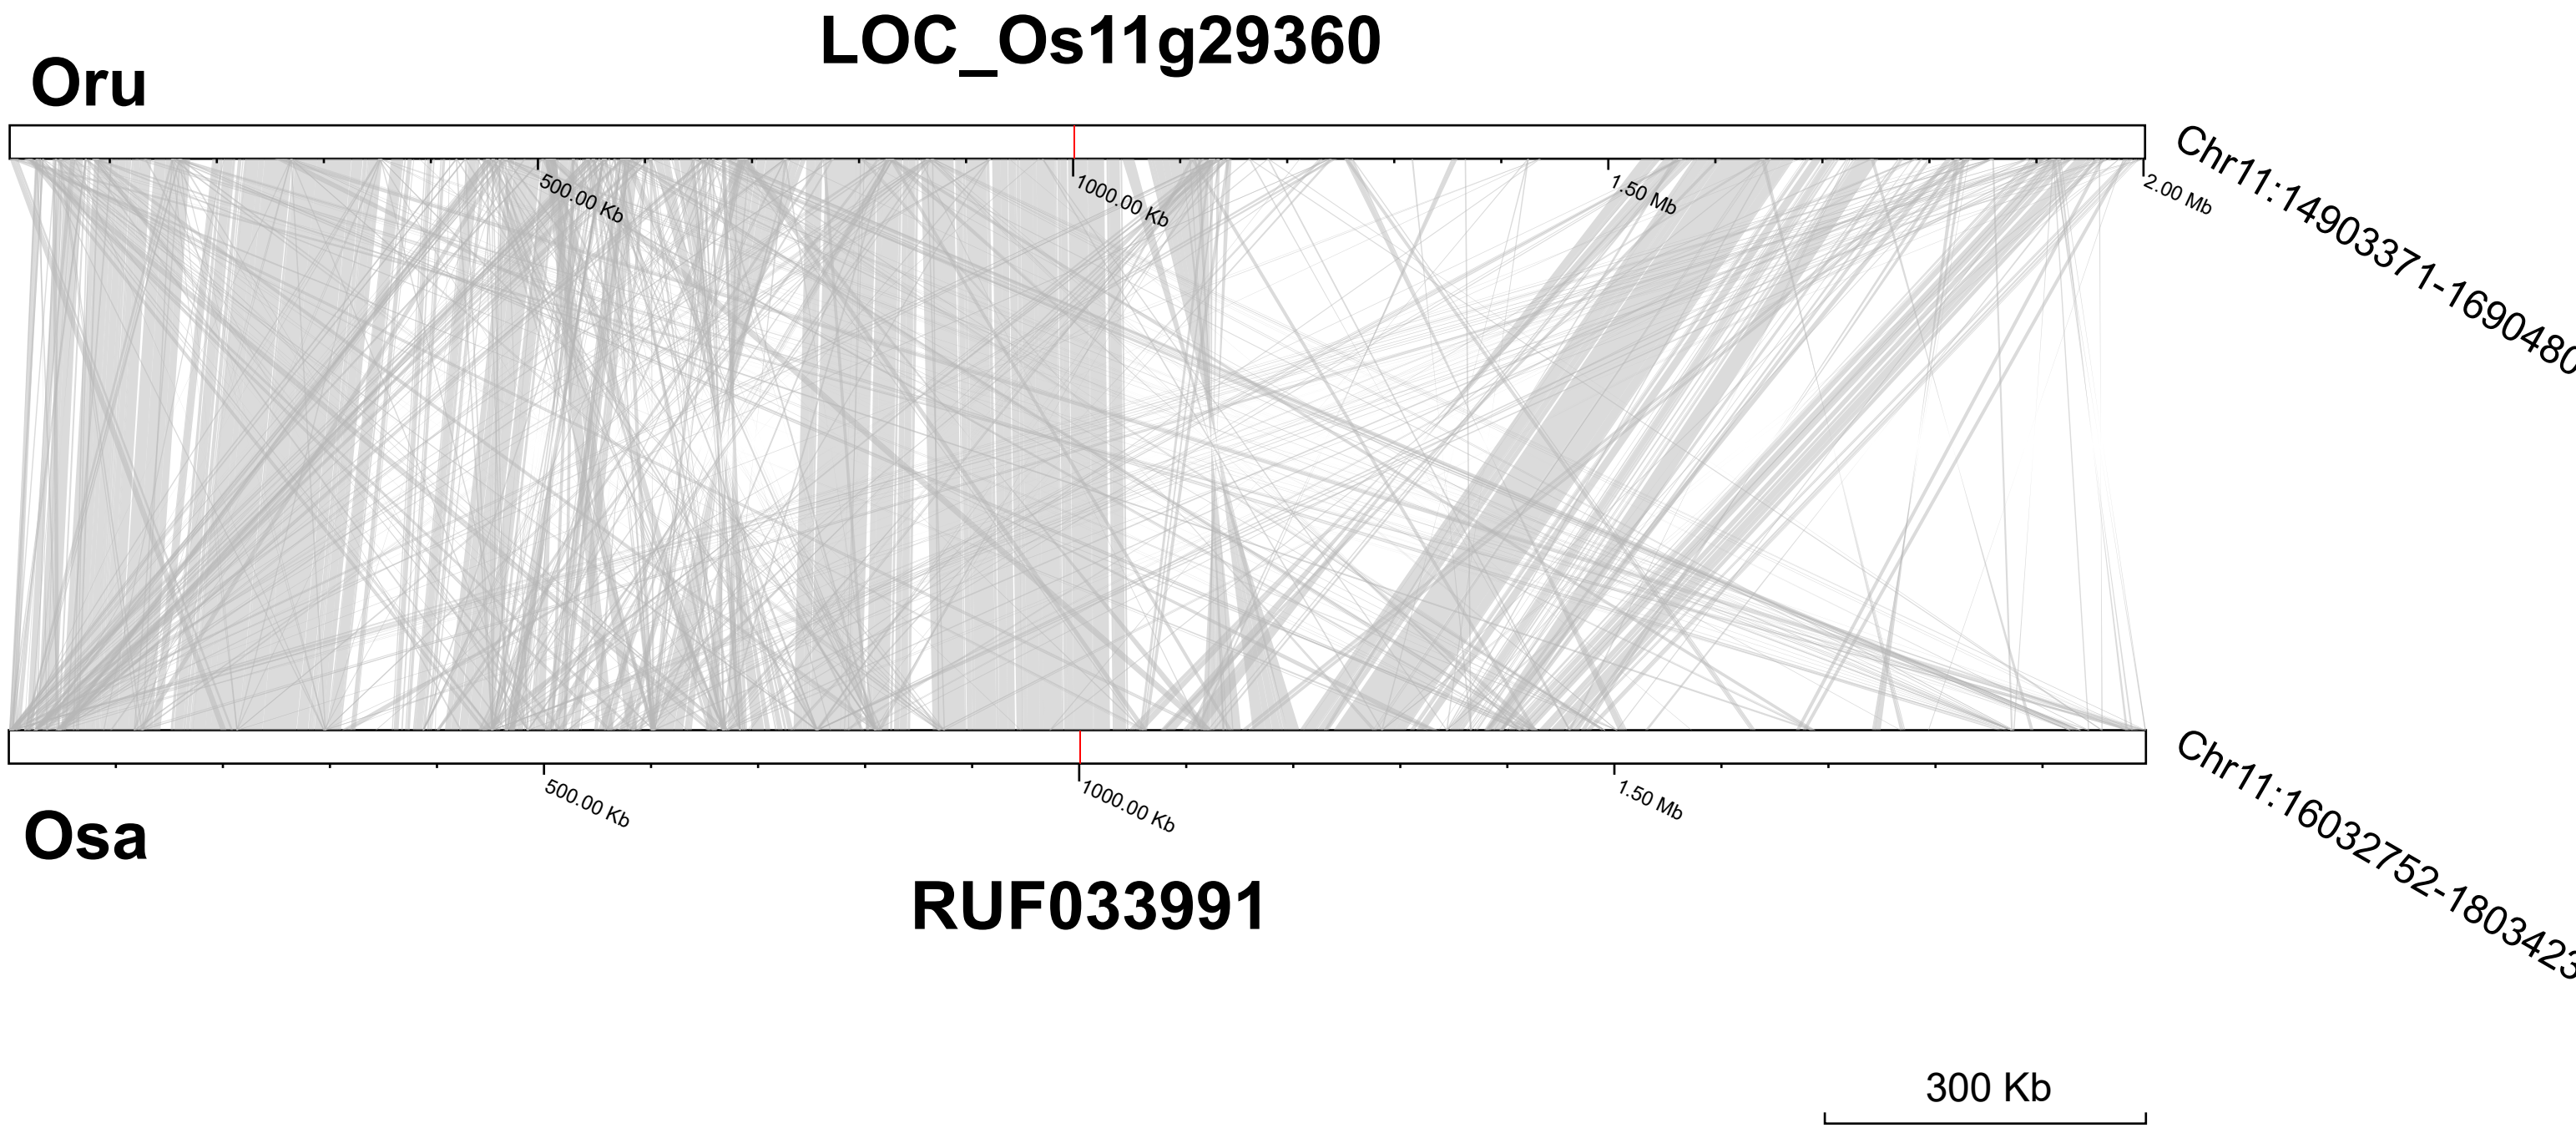

Supplement: s1 [file s1]

**a**

among 5 up-/down-stream

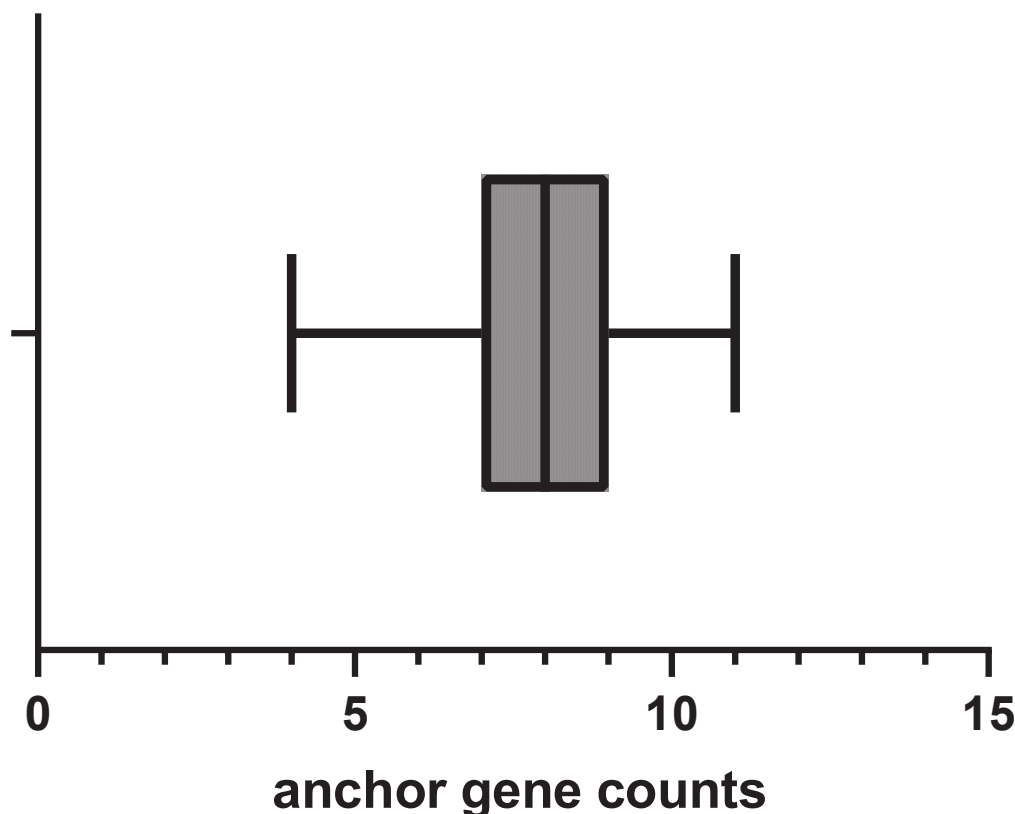**b**

among 20 up-/down-stream

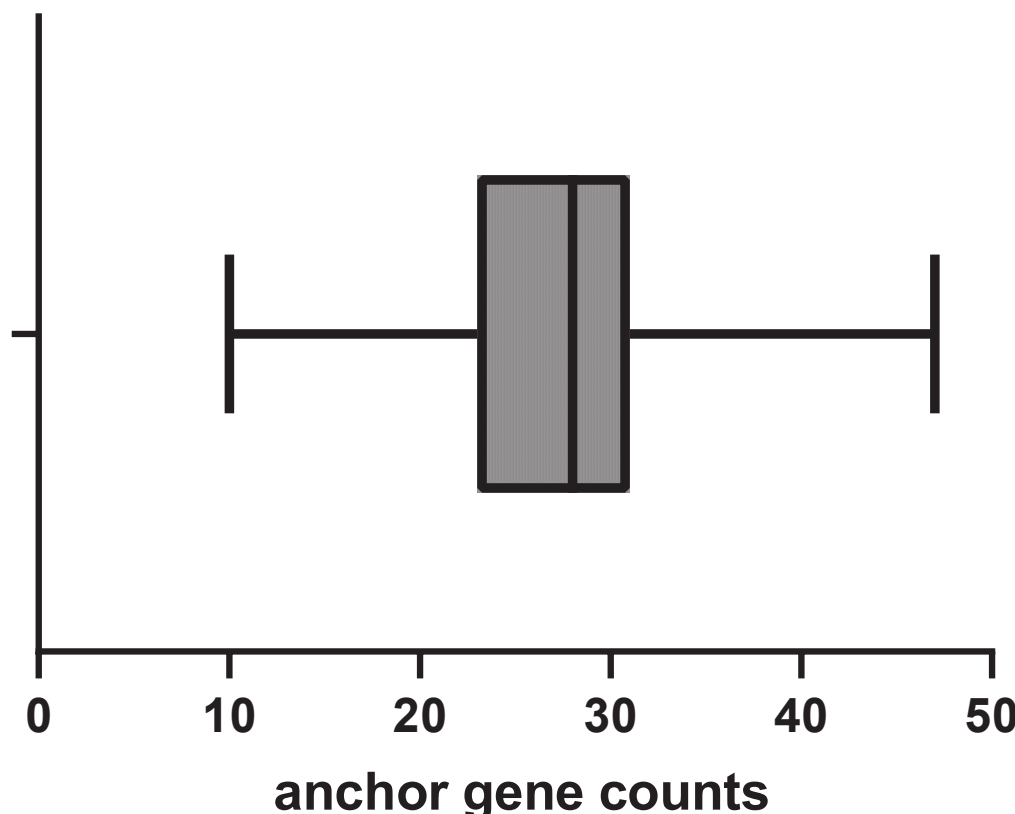

Supplement: s1 [file s1]

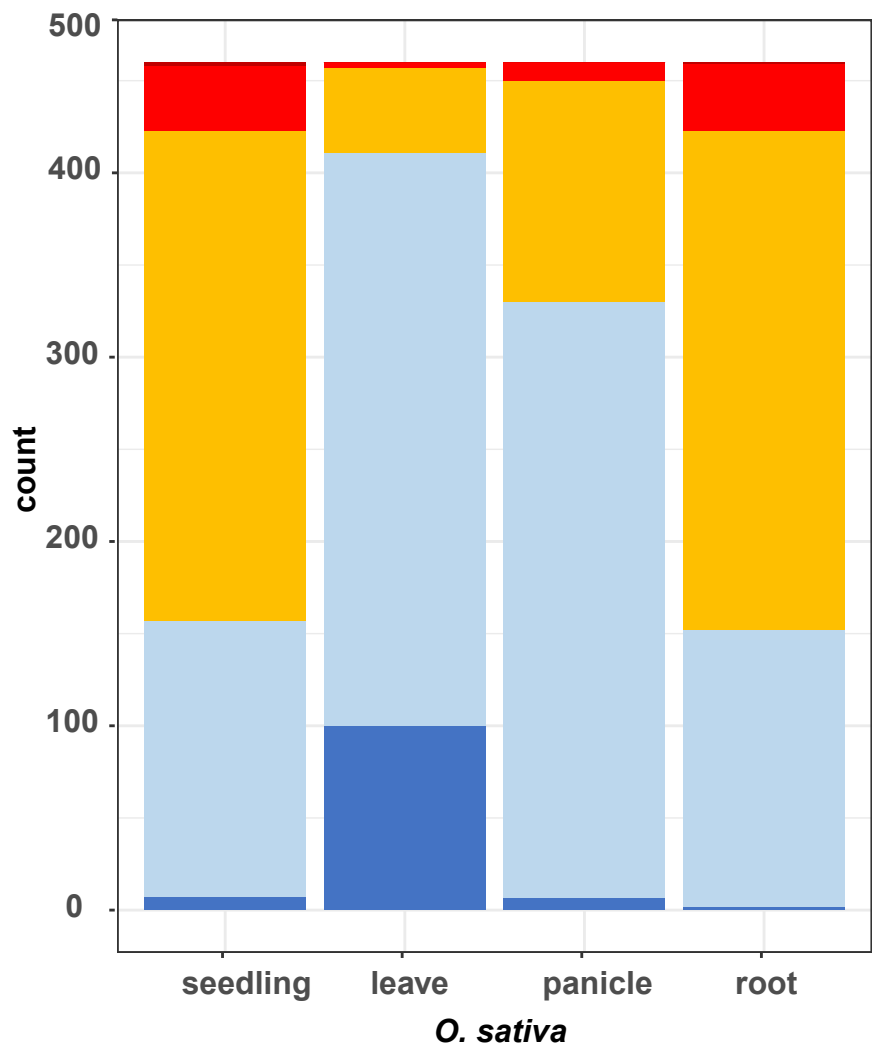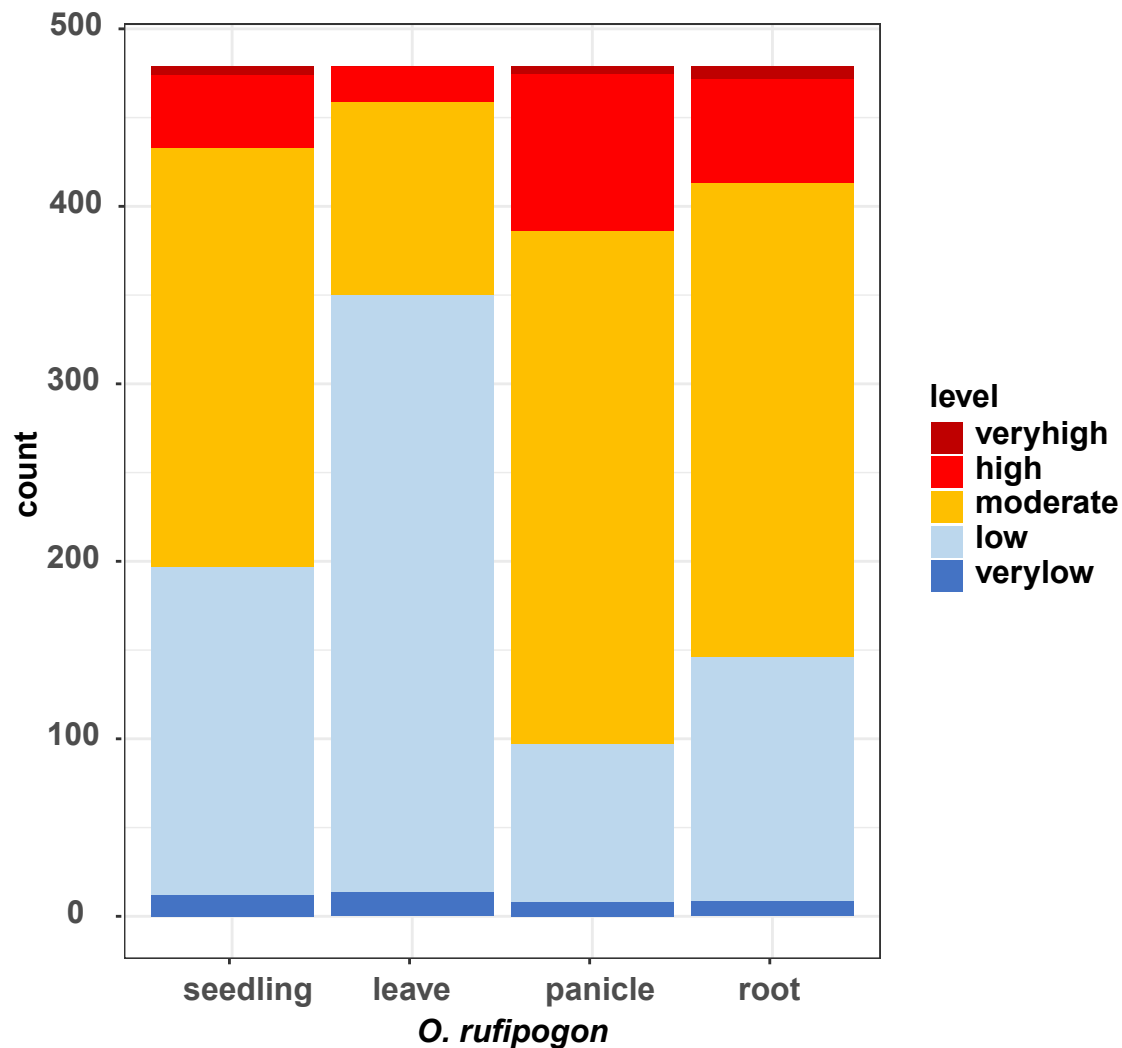

Supplement: s1 [file s1]

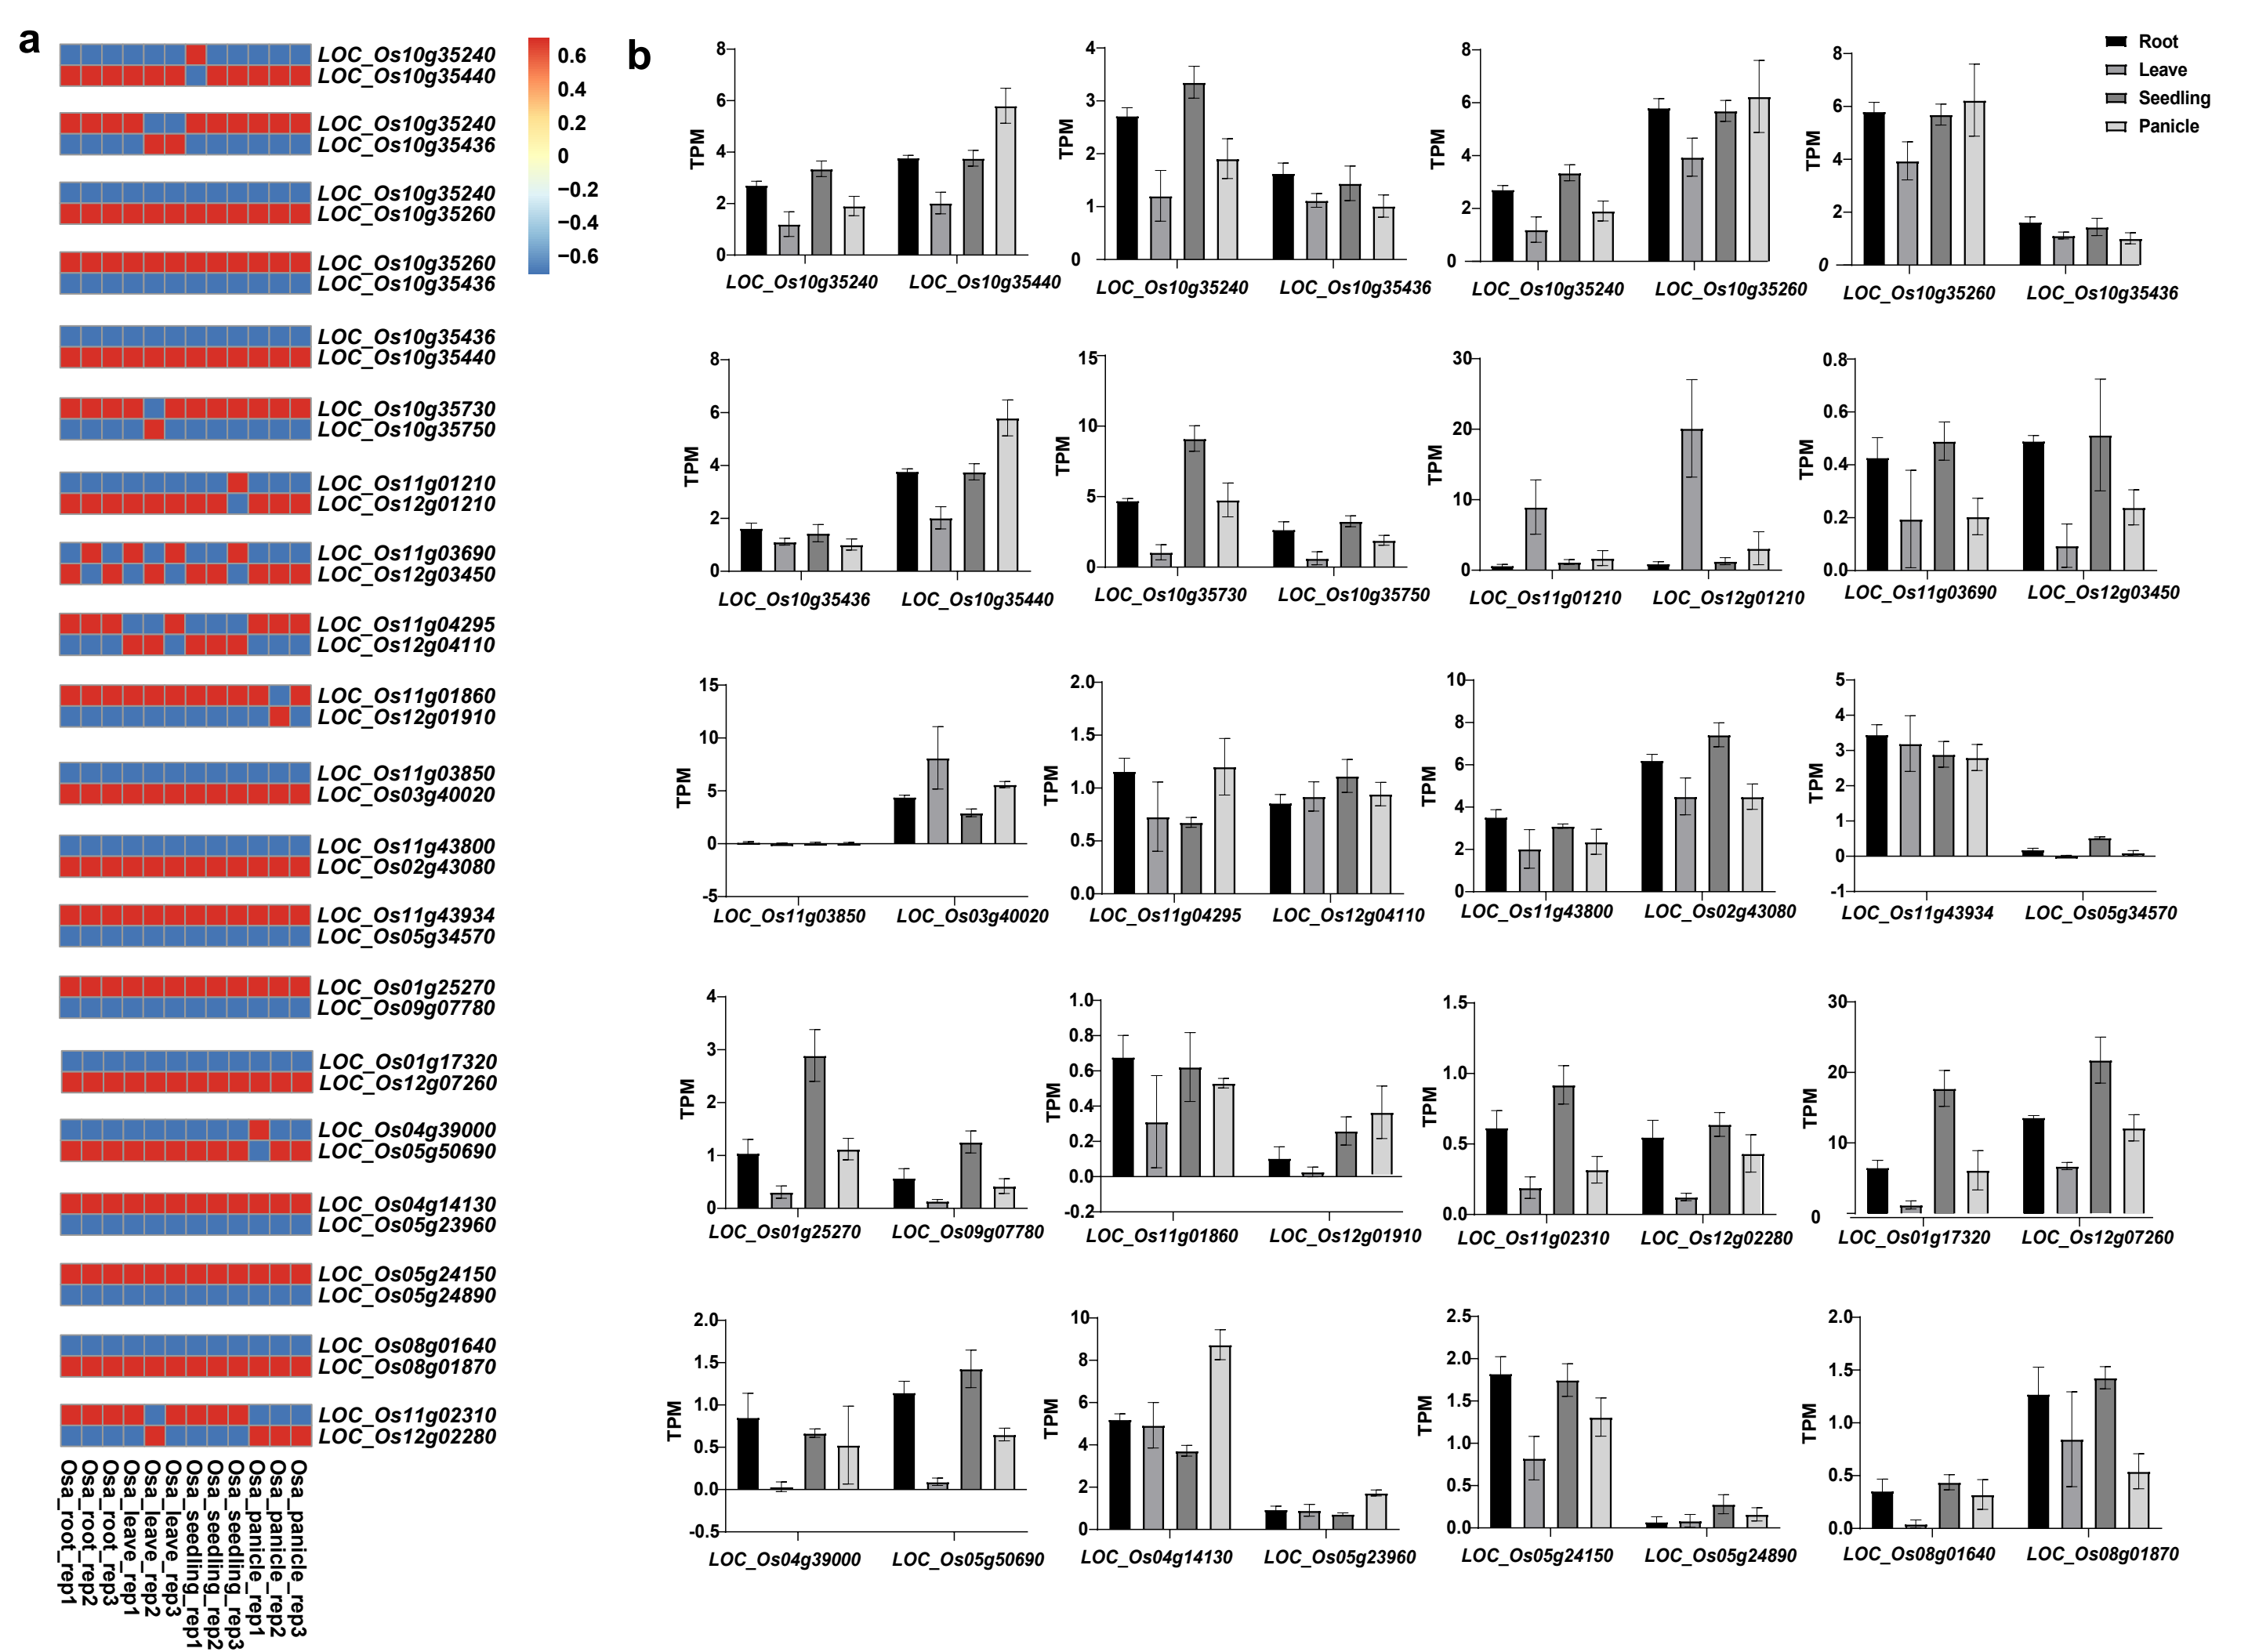

Supplement: s1 [file s1]

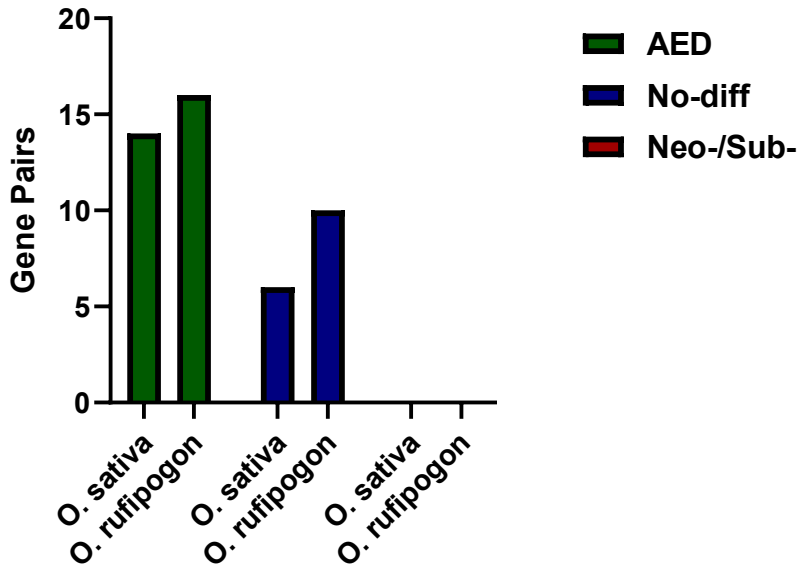

Supplement: s1 [file s1]

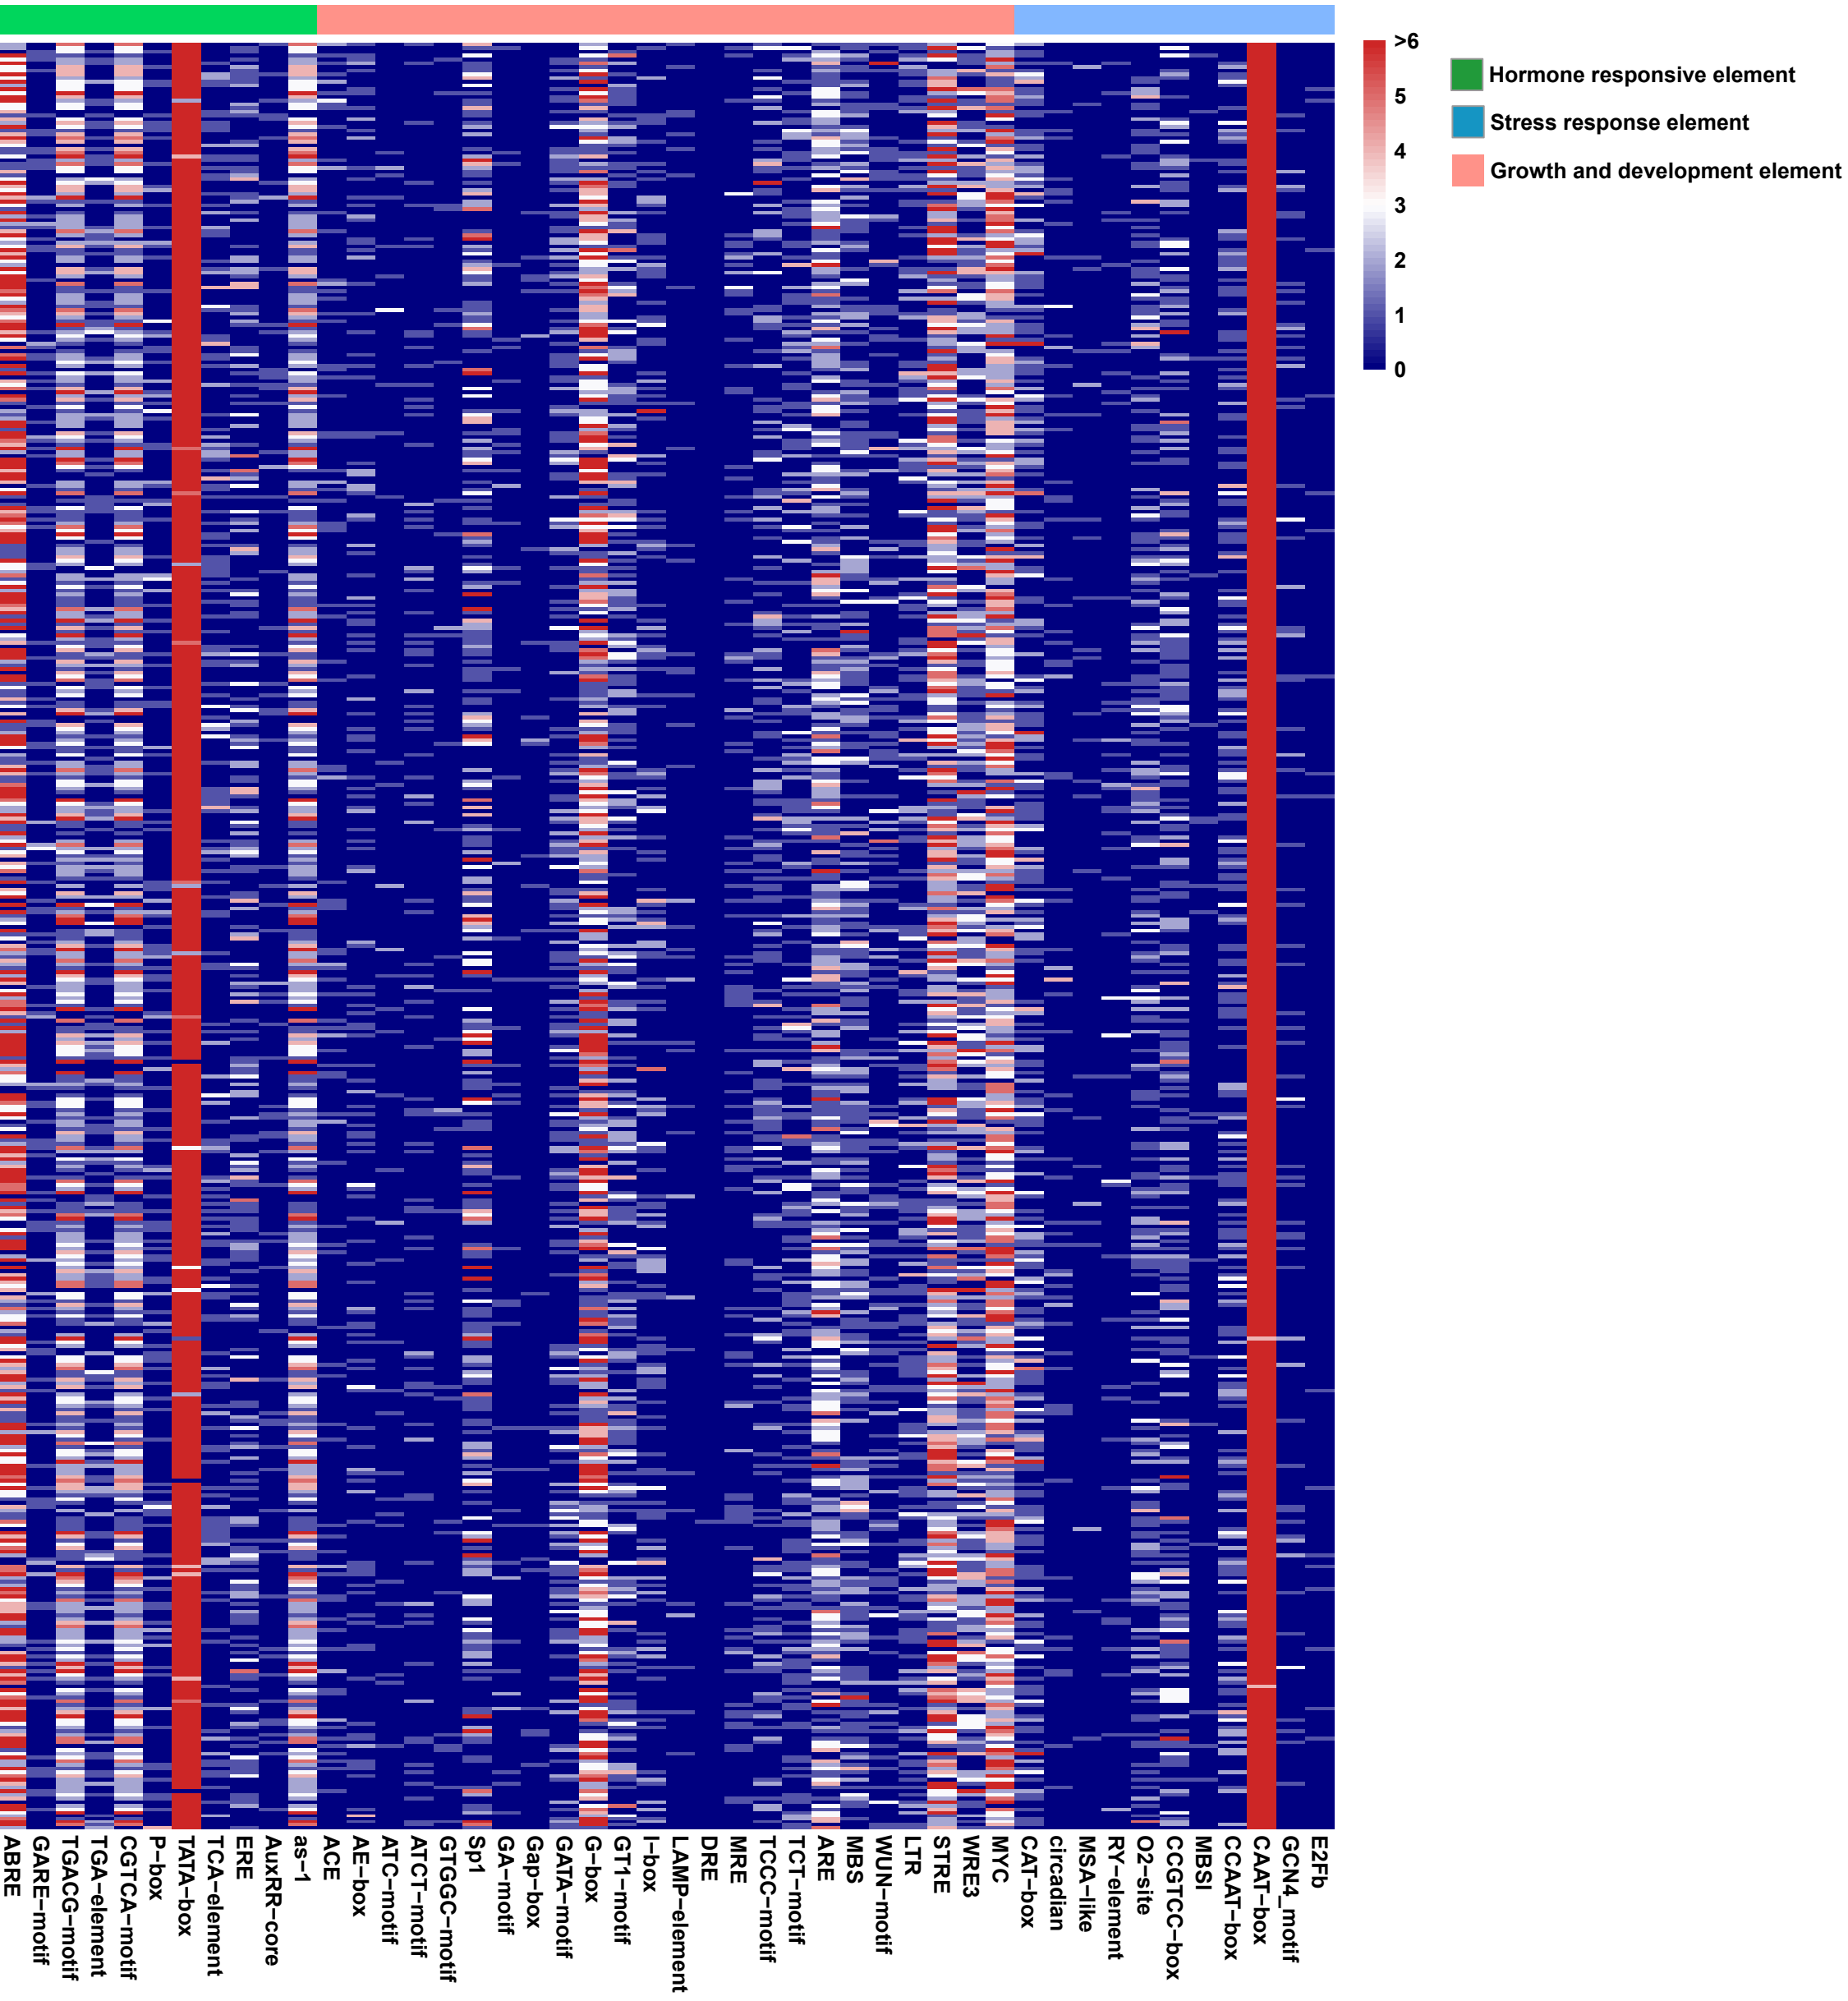

Supplement: s1 [file s1]

[illegible]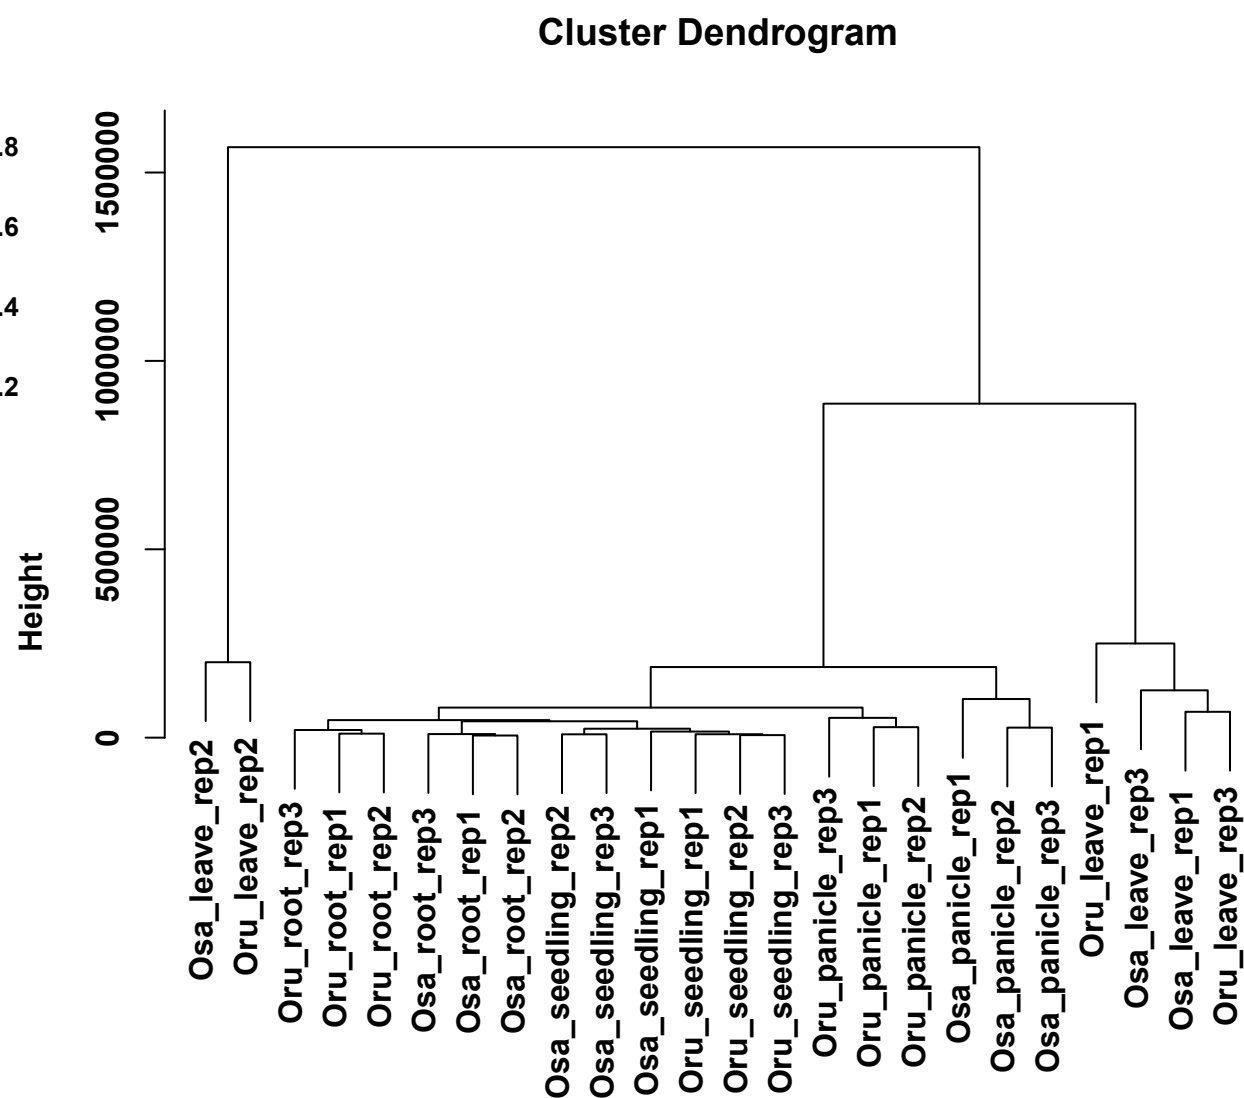

Supplement: s1 [file s1]

**a**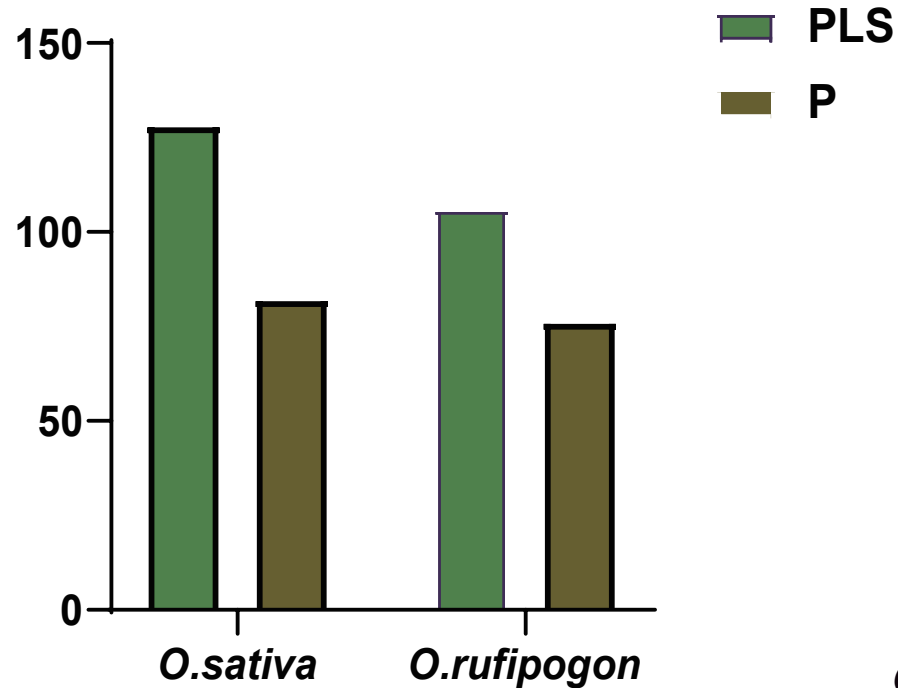**b**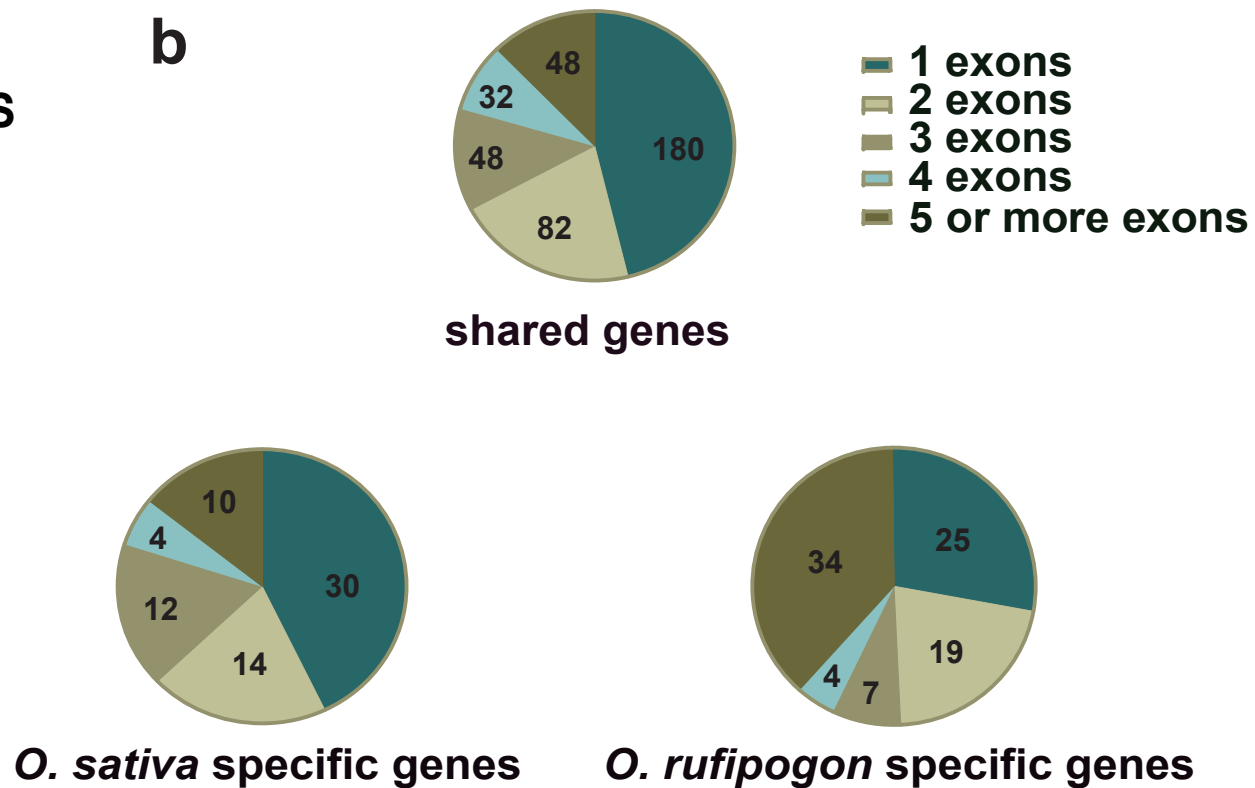

Supplement: s1 [file s1]

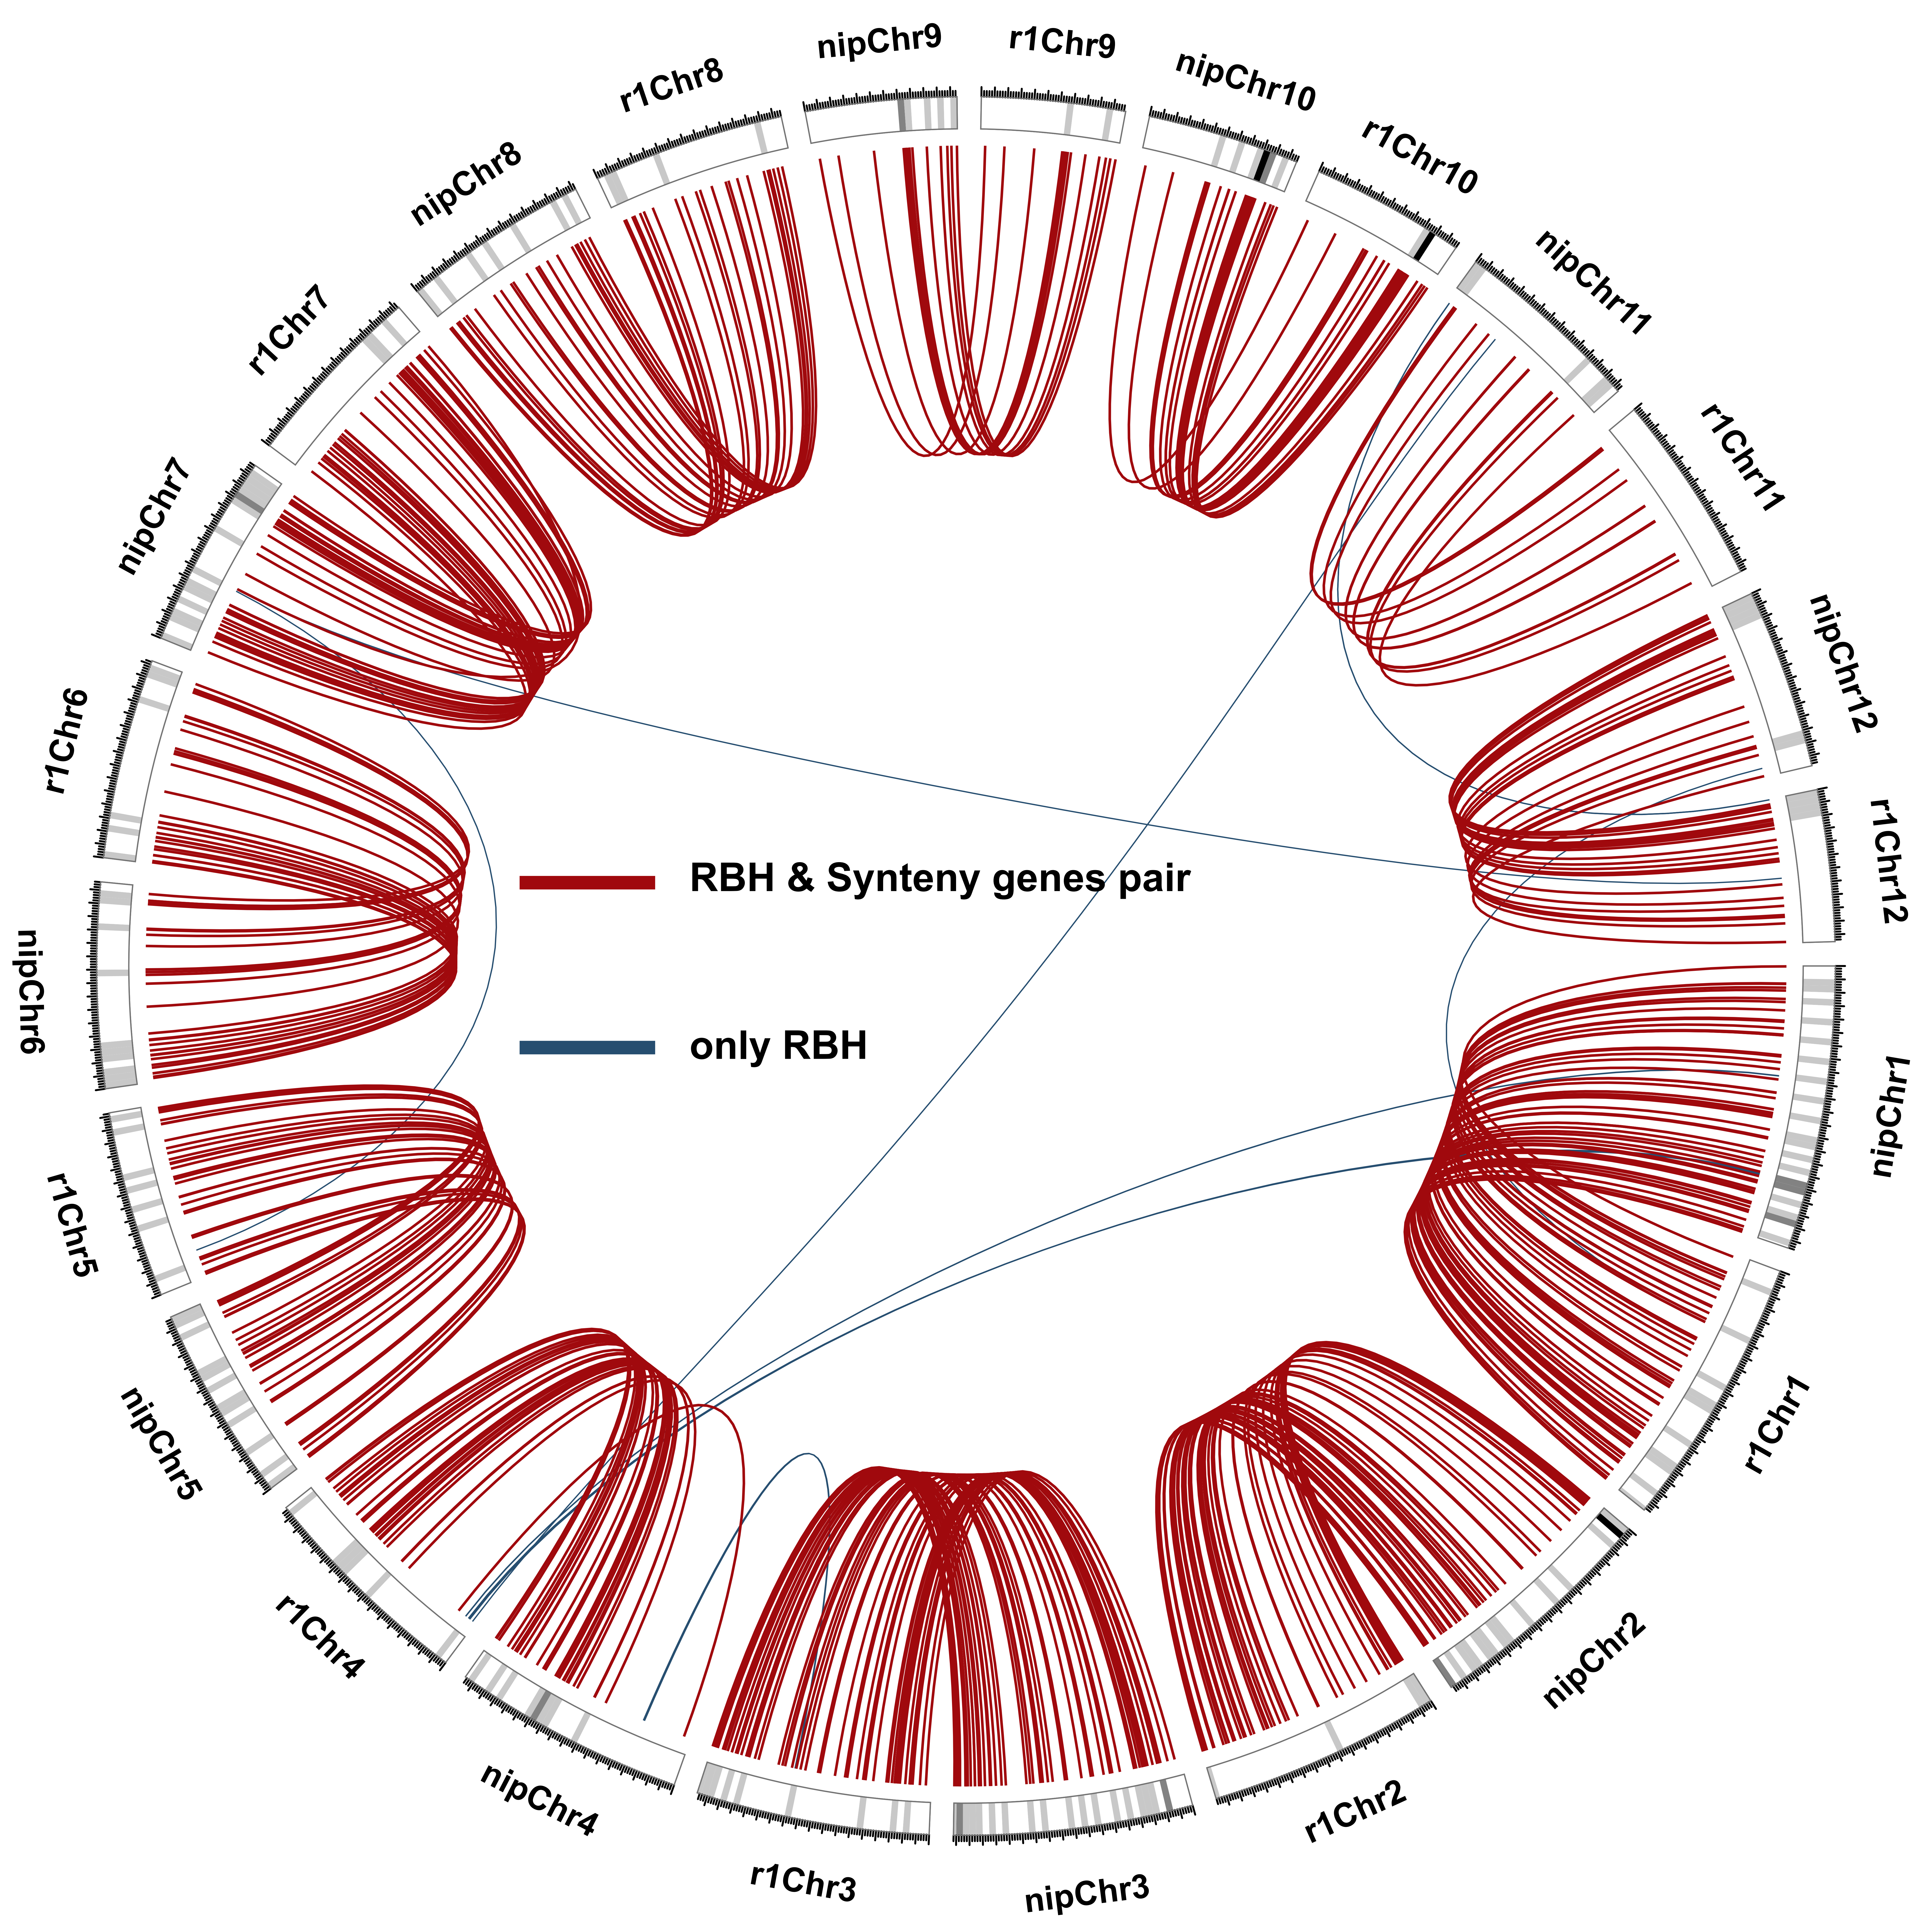

Supplement: s1 [file s1]

a

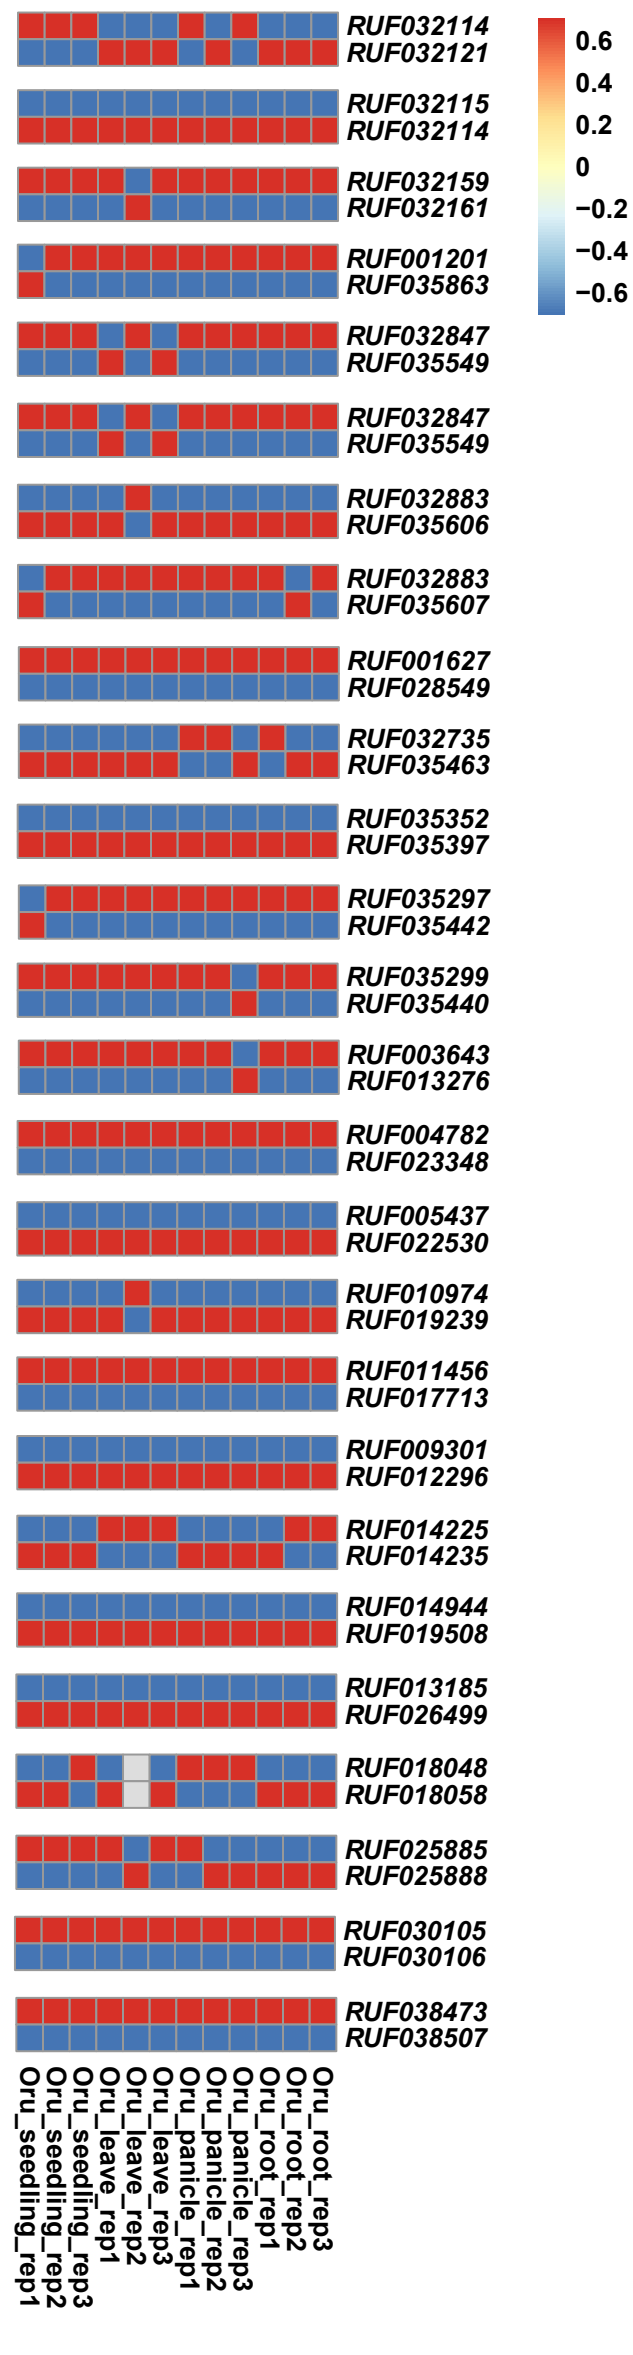

b

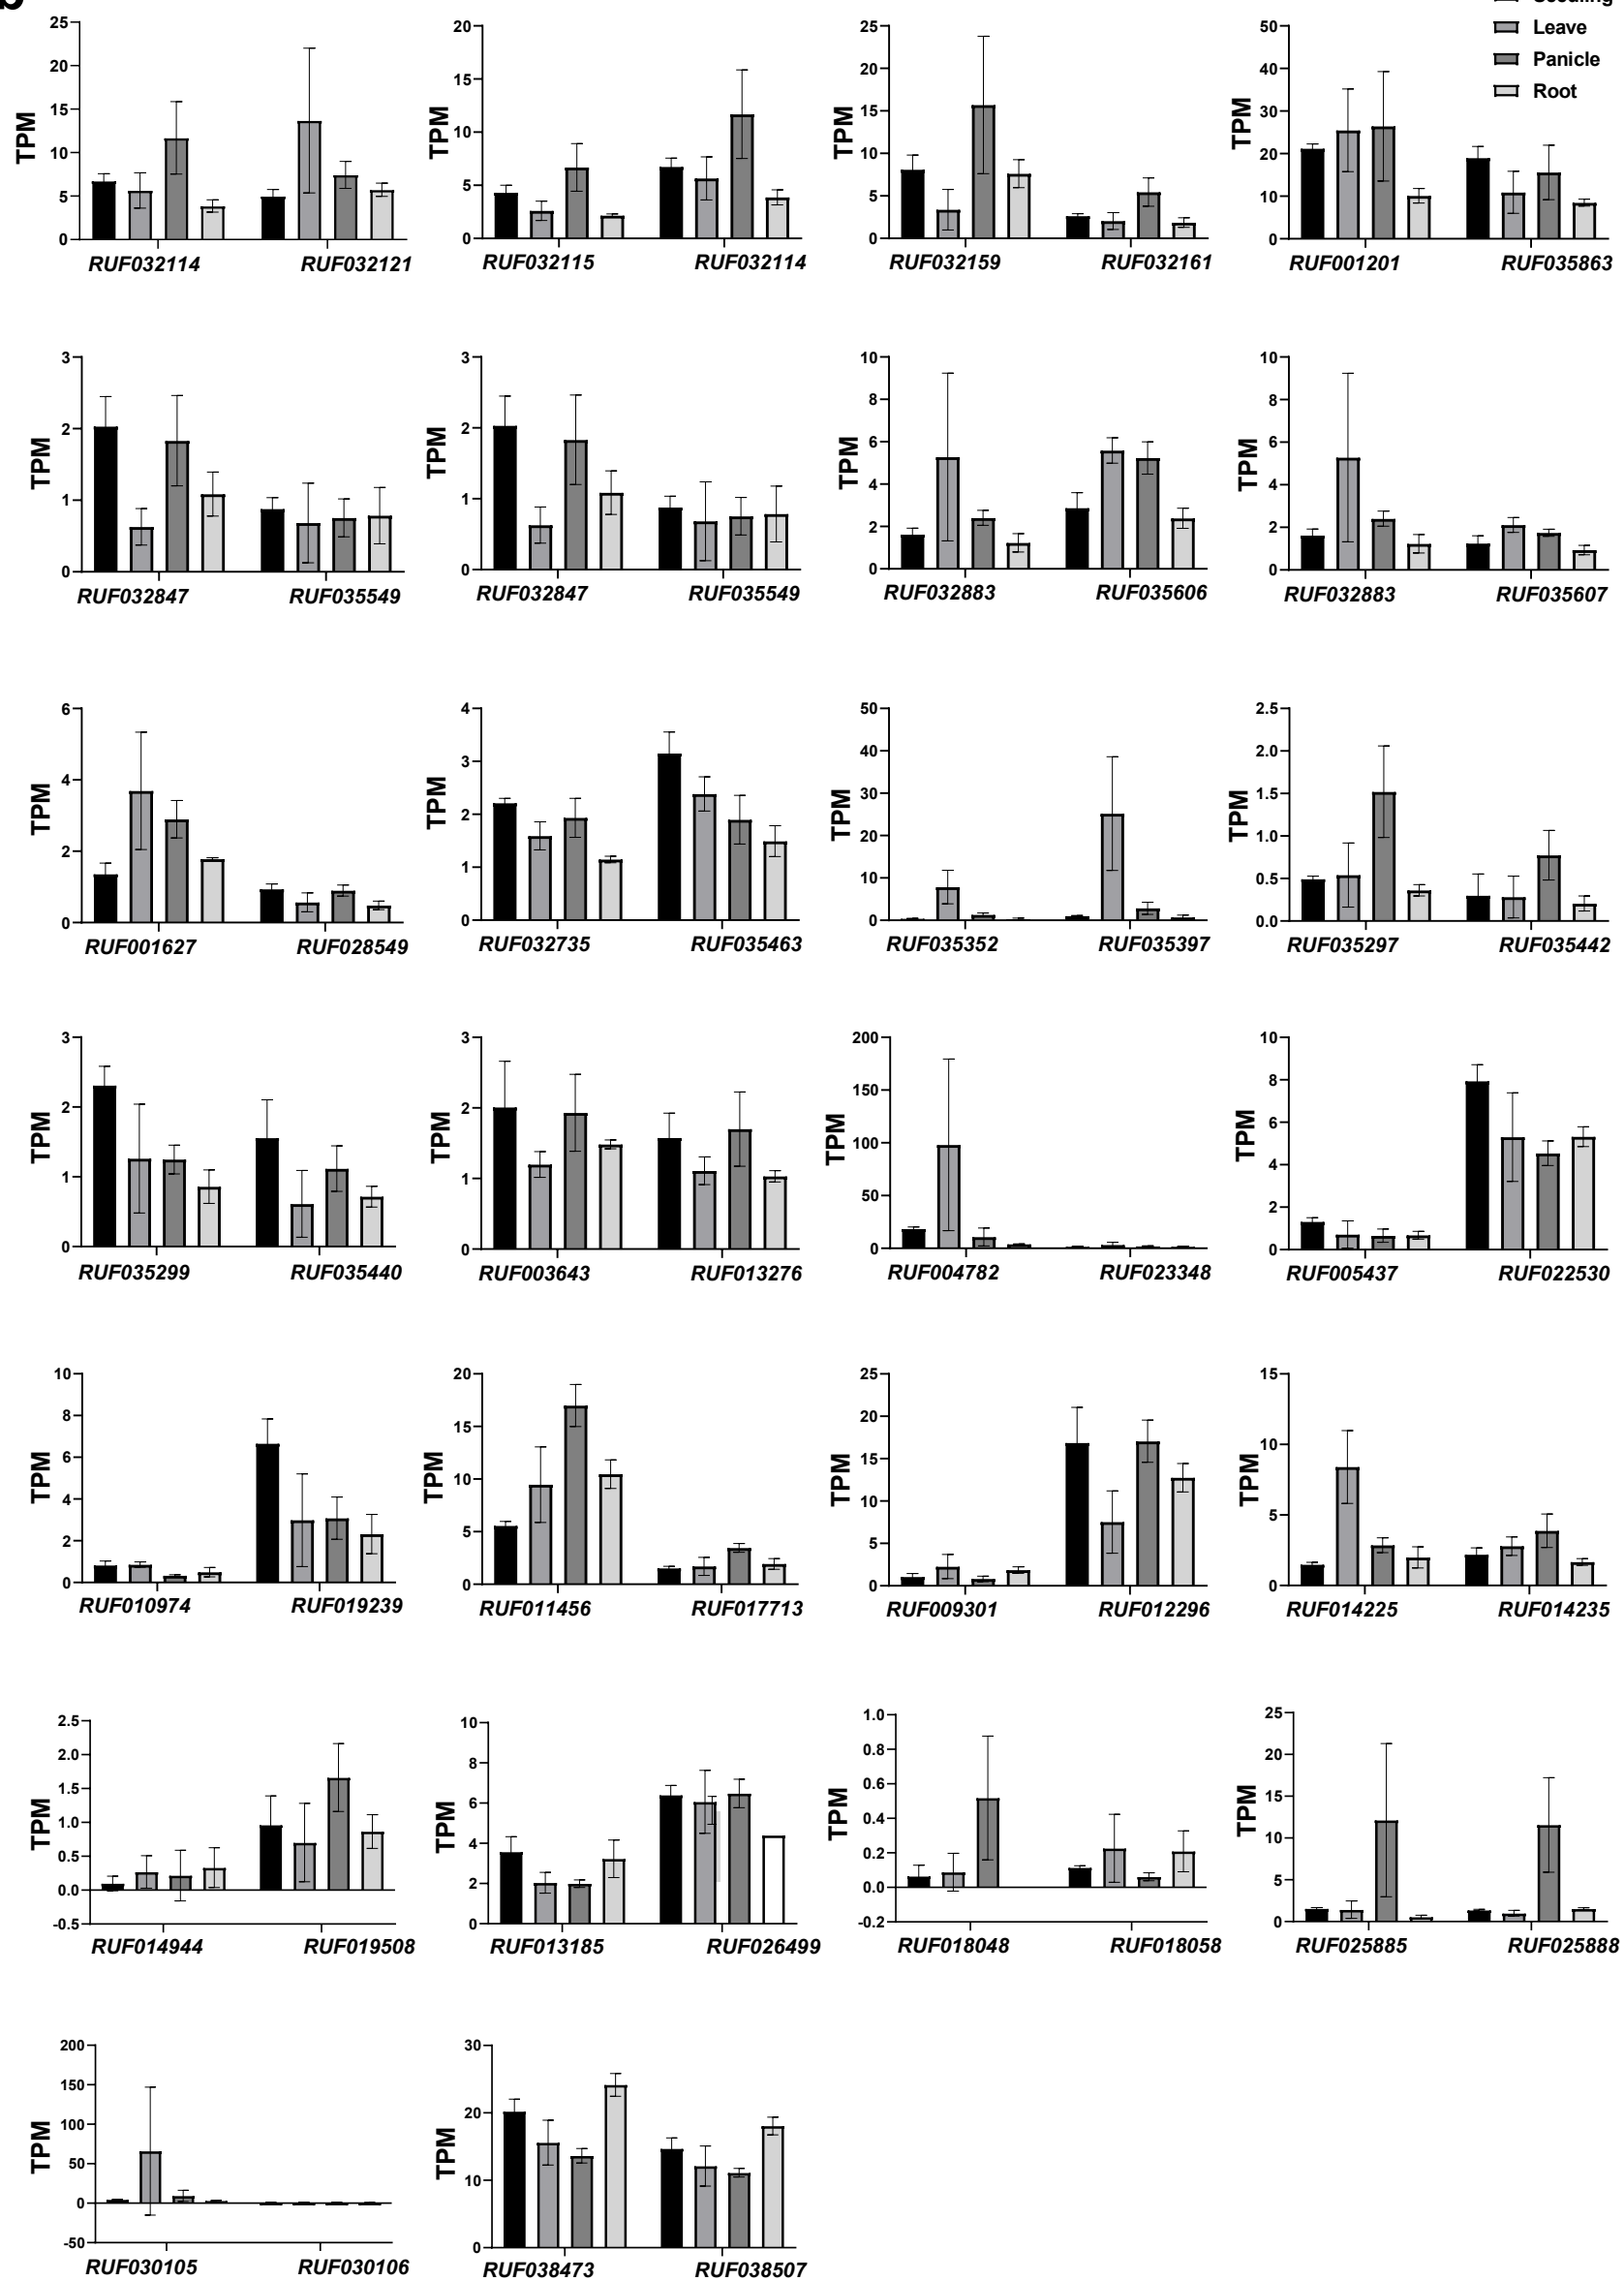

Supplement: s1 [file s1]
